# Supplementary material for: The effect of deep ocean currents on ocean- bottom seismometers records
Source: Copernicus journal article supplement (doi:10.5194/nhess-23-1433-2023), 2023-04-20
Supplement: Supplementary file 1 [file nhess-23-1433-2023-supplement.pdf]

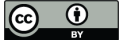

*Supplement of*

## **The effect of deep ocean currents on ocean-bottom seismometers records**

**Carlos Corela et al.**

*Correspondence to:* Carlos Corela (ccorela@fc.ul.pt)

The copyright of individual parts of the supplement might differ from the article licence.

## **Electronic Supplement**

### **Contents**

This electronic supplement contains a tide table from Lagos, Sines, and Cascais (Portugal) from 10 September 2007 until 28 September 2007, showing a complete tide cycle from spring to neap tide and finishes in a spring tide to show that the ocean bottom has a flow regime that may have two contributions, the permanent low-frequency bottom current, and the tidal current. The recorded noise displays the balance between these two currents along the entire tidal cycle, between neap and spring tides. For each day of the tide cycle, we show the day-plot of the OBSs data record, the raw waveform in counts of the vertical and horizontal Y components, the waveform corrected for instrument response and filtered in the short [0.5,10]Hz and long period [0.0167,0.1]Hz in terms of acceleration ( $m/s^2$ ) with ObsPy software (Krischer et al., 2015). The spectrograms were made with GMT (Wessel et al., 2013), and the tide cycle of that day.

**Table S1 – Tide from Lagos/Sines/Cascais (Portugal) between 10/09/2007 and 28/09/2007.**  
 (Source: Instituto Hidrográfico, Marinha - Portugal, [Instituto Hidrográfico \(hidrografico.pt\)](http://www.instituto-hidrografico.pt))

| Date          | Time              | Tide(m)     | Phenomenon    | Tide range(m) |
|---------------|-------------------|-------------|---------------|---------------|
| 10/09/2007    | 02:31/02:39/02:43 | 3.1/3.1/3.2 | High Tide     | 2.3/2.3/2.4   |
| 10/09/2007    | 08:28/08:36/08:39 | 0.9/0.9/0.9 | Low tide      | 2.2/2.2/2.3   |
| 10/09/2007    | 14:43/14:52/14:55 | 3.4/3.4/3.5 | High Tide     | 2.5/2.5/2.6   |
| 10/09/2007    | 20:56/21:05/21:08 | 0.7/0.7/0.7 | Low Tide      | 2.7/2.7/2.8   |
| 11/09/2007    | 03:04/03:12/03:15 | 3.2/3.2/3.3 | High Tide     | 2.5/2.5/2.6   |
| 11/09/2007    | 09:00/09:09/09:12 | 0.8/0.8/0.9 | Low Tide      | 2.4/2.4/2.4   |
| 11/09/2007    | 13:44             | -           | New Moon      |               |
| 11/09/2007    | 15:16/15:25/15:28 | 3.5/3.4/3.5 | High Tide     | 2.7/2.6/2.6   |
| 11/09/2007    | 21:25/21:35/21:38 | 0.6/0.6/0.7 | Low Tide      | 2.9/2.8/2.8   |
| 12/09/2007    | 03:35/03:43/03:46 | 3.3/3.2/3.4 | High Tide     | 2.7/2.6/2.7   |
| 12/09/2007    | 09:29/09:40/09:43 | 0.7/0.7/0.8 | Low Tide      | 2.6/2.5/2.6   |
| 12/09/2007    | 15:47/15:56/15:59 | 3.5/3.4/3.5 | High Tide     | 2.8/2.7/2.7   |
| 12/09/2007    | 21:53/22:04/22:06 | 0.6/0.7/0.7 | Low Tide      | 2.9/2.7/2.8   |
| 13/09/2007    | 04:04/04:13/04:15 | 3.3/3.2/3.4 | High Tide     | 2.7/2.5/2.7   |
| 13/09/2007    | 09:59/10:10/10:13 | 0.7/0.7/0.8 | Low Tide      | 2.6/2.5/2.6   |
| 13/09/2007    | 16:17/16:26/16:29 | 3.4/3.4/3.5 | High Tide     | 2.7/2.7/2.7   |
| 13/09/2007    | 22:21/22:32/22:34 | 0.7/0.7/0.8 | Low Tide      | 2.7/2.7/2.7   |
| 14/09/2007    | 04:33/04:42/04:44 | 3.2/3.2/3.3 | High Tide     | 2.5/2.5/2.5   |
| 14/09/2007    | 10:28/10:40/10:42 | 0.7/0.8/0.8 | Low Tide      | 2.5/2.4/2.5   |
| 14/09/2007    | 16:46/16:55/16:58 | 3.3/3.3/3.4 | High Tide     | 2.6/2.5/2.6   |
| 14/09/2007    | 22:49/22:59/23:02 | 0.8/0.8/0.9 | Low Tide      | 2.5/2.5/2.5   |
| 15/09/2007    | 05:02/05:11/05:13 | 3.2/3.1/3.2 | High Tide     | 2.4/2.3/2.3   |
| 15/09/2007    | 10:58/11:10/11:12 | 0.8/0.9/0.9 | Low Tide      | 2.4/2.2/2.3   |
| 15/09/2007    | 17:15/17:25/17:27 | 3.2/3.1/3.2 | High Tide     | 2.4/2.2/2.3   |
| 15/09/2007    | 23:17/23:27/23:30 | 0.9/1.0/1.0 | Low Tide      | 2.3/2.1/2.2   |
| 16/09/2007    | 05:31/05:40/05:43 | 3.0/3.0/3.1 | High Tide     | 2.1/2.0/2.1   |
| 16/09/2007    | 11:29/11:41/11:44 | 1.0/1.0/1.1 | Low Tide      | 2.0/2.0/2.0   |
| 16/09/2007    | 17:46/17:56/17:58 | 3.0/2.9/3.0 | High Tide     | 2.0/1.9/2.1   |
| 16-17/09/2007 | 23:47/23:57/00:00 | 1.1/1.1/1.2 | Low Tide      | 1.9/1.8/1.8   |
| 17/09/2007    | 06:03/06:13/06:15 | 2.9/2.9/3.0 | High Tide     | 1.8/1.8/1.8   |
| 17/09/2007    | 12:03/12:16/12:18 | 1.2/1.2/1.2 | Low Tide      | 1.7/1.7/1.8   |
| 17/09/2007    | 18:19/18:30/18:32 | 2.8/2.7/2.8 | High Tide     | 1.6/1.5/1.6   |
| 18/09/2007    | 00:21/00:30/00:34 | 1.3/1.3/1.3 | Low Tide      | 1.5/1.4/1.5   |
| 18/09/2007    | 06:40/06:51/06:53 | 2.7/2.7/2.8 | High Tide     | 1.4/1.4/1.5   |
| 18/09/2007    | 12:44/12:58/13:00 | 1.4/1.4/1.4 | Low Tide      | 1.3/1.3/1.4   |
| 18/09/2007    | 19:02/19:13/19:15 | 2.6/2.5/2.6 | High Tide     | 1.2/1.1/1.2   |
| 19/09/2007    | 01:03/01:12/01:17 | 1.5/1.5/1.5 | Low Tide      | 1.1/1.0/1.1   |
| 19/09/2007    | 07:31/07:43/07:46 | 2.6/2.6/2.7 | High Tide     | 1.1/1.1/1.2   |
| 19/09/2007    | 13:44/13:59/14:00 | 1.5/1.5/1.6 | Low Tide      | 1.1/1.1/1.1   |
| 19/09/2007    | 17:48             |             | First quarter |               |
| 19/09/2007    | 20:08/20:19/20:20 | 2.4/2.4/2.5 | High Tide     | 0.9/0.9/0.9   |
| 20/09/2007    | 02:12/02:21/02:25 | 1.6/1.6/1.7 | Low Tide      | 0.8/0.8/0.8   |
| 20/09/2007    | 08:53/09:04/09:07 | 2.4/2.5/2.6 | High Tide     | 0.8/0.9/0.9   |
| 20/09/2007    | 15:29/15:45/15:41 | 1.6/1.6/1.7 | Low Tide      | 0.8/0.9/0.9   |
| 20/09/2007    | 21:58/22:05/22:05 | 2.3/2.3/2.4 | High Tide     | 0.7/0.7/0.7   |
| 21/09/2007    | 04:08/04:19/04:18 | 1.7/1.7/1.7 | Low Tide      | 0.6/0.6/0.7   |

|            |                   |             |           |             |
|------------|-------------------|-------------|-----------|-------------|
| 21/09/2007 | 10:38/10:46/10:47 | 2.5/2.5/2.6 | High Tide | 0.8/0.8/0.9 |
| 21/09/2007 | 17:19/17:32/17:27 | 1.5/1.5/1.6 | Low Tide  | 1.0/1.0/1.0 |
| 21/09/2007 | 23:34/23:43/23:44 | 2.4/2.4/2.5 | High Tide | 0.9/0.9/0.9 |
| 22/09/2007 | 05:38/05:48/05:48 | 1.5/1.5/1.6 | Low Tide  | 0.9/0.9/0.9 |
| 22/09/2007 | 11:52/12:01/12:03 | 2.7/2.7/2.8 | High Tide | 1.2/1.2/1.2 |
| 22/09/2007 | 18:22/18:33/18:32 | 1.3/1.3/1.3 | Low Tide  | 1.4/1.4/1.5 |
| 23/09/2007 | 00:31/00:41/00:44 | 2.7/2.6/2.7 | High Tide | 1.4/1.3/1.4 |
| 23/09/2007 | 06:34/06:42/06:43 | 1.3/1.3/1.3 | Low Tide  | 1.4/1.3/1.4 |
| 23/09/2007 | 12:43/12:53/12:56 | 3.0/3.0/3.1 | High Tide | 1.7/1.7/1.8 |
| 23/09/2007 | 19:06/19:17/19:17 | 1.0/1.0/1.1 | Low Tide  | 2.0/2.0/2.0 |
| 24/09/2007 | 01:15/01:25/01:28 | 2.9/2.9/3.0 | High Tide | 1.9/1.9/1.9 |
| 24/09/2007 | 07:17/07:25/07:26 | 1.0/1.0/1.1 | Low Tide  | 1.9/1.9/1.9 |
| 24/09/2007 | 13:26/13:35/13:38 | 3.3/3.2/3.3 | High Tide | 2.3/2.2/2.2 |
| 24/09/2007 | 19:44/19:55/19:55 | 0.7/0.7/0.8 | Low Tide  | 2.5/2.5/2.5 |
| 25/09/2007 | 01:54/02:03/02:06 | 3.2/3.2/3.3 | High Tide | 2.5/2.5/2.5 |
| 25/09/2007 | 07:56/08:03/08:06 | 0.7/0.8/0.8 | Low Tide  | 2.5/2.4/2.5 |
| 25/09/2007 | 14:07/14:15/14:19 | 3.5/3.5/3.6 | High Tide | 2.8/2.7/2.8 |
| 25/09/2007 | 20:21/20:31/20:33 | 0.5/0.5/0.6 | Low Tide  | 3.0/3.0/3.0 |
| 26/07/2007 | 02:32/02:41/02:44 | 3.4/3.4/3.5 | High Tide | 2.9/2.9/2.9 |
| 26/07/2007 | 08:34/08:42/08:44 | 0.5/0.6/0.6 | Low Tide  | 2.9/2.8/2.9 |
| 26/07/2007 | 14:47/14:55/14:58 | 3.7/3.7/3.8 | High Tide | 3.2/3.2/3.2 |
| 26/07/2007 | 20:45             |             | Full Moon |             |
| 26/07/2007 | 20:58/21:08/21:10 | 0.3/0.4/0.4 | Low Tide  | 3.4/3.3/3.4 |
| 27/07/2007 | 03:11/03:19/03:22 | 3.6/3.5/3.7 | High Tide | 3.3/3.1/3.3 |
| 27/07/2007 | 09:12/09:20/09:23 | 0.4/0.4/0.4 | Low Tide  | 3.2/3.1/3.3 |
| 27/07/2007 | 15:27/15:36/15:39 | 3.8/3.8/3.9 | High Tide | 3.4/3.4/3.5 |
| 27/07/2007 | 21:36/21:46/21:49 | 0.3/0.3/0.3 | Low Tide  | 3.5/3.5/3.6 |
| 28/07/2007 | 03:50/03:58/04:01 | 3.7/3.6/3.7 | High Tide | 3.4/3.3/3.4 |
| 28/07/2007 | 09:52/10:01/10:04 | 0.3/0.3/0.3 | Low Tide  | 3.4/3.3/3.4 |
| 28/07/2007 | 16:09/16:17/16:20 | 3.8/3.8/3.9 | High Tide | 3.5/3.5/3.6 |
| 28/07/2007 | 22:15/22:25/22:28 | 0.3/0.4/0.4 | Low Tide  | 3.5/3.4/3.5 |

Legend:

Tide range – Difference between the amplitude of High Tide and Low Tide

Yellow – face of the moon

Green – Spring Tide

Blue – Neap Tide

Sequence from spring tide to neap tide and back to spring tide (2007-09-10 to 2007-09-28)

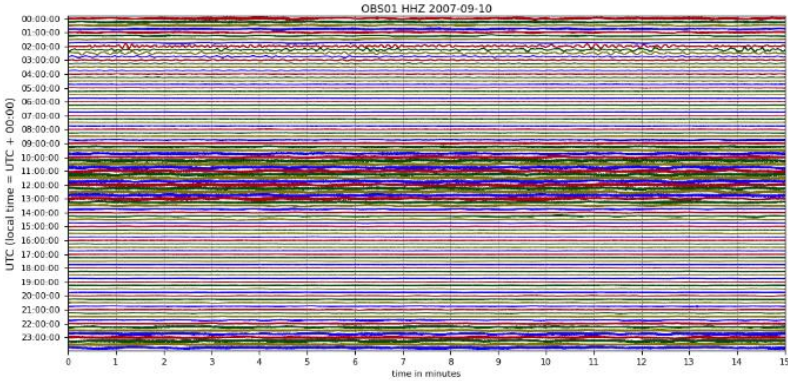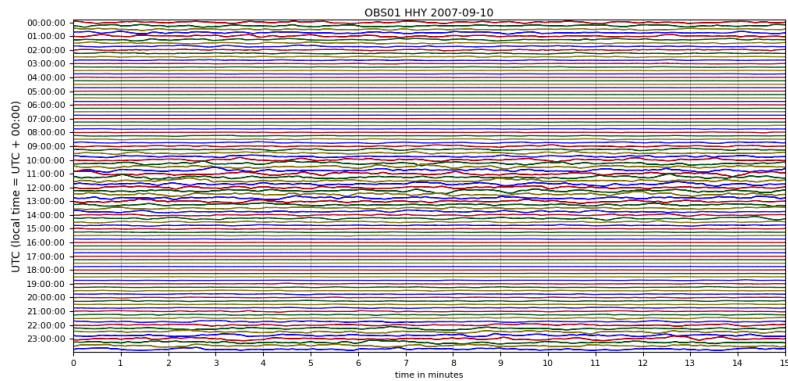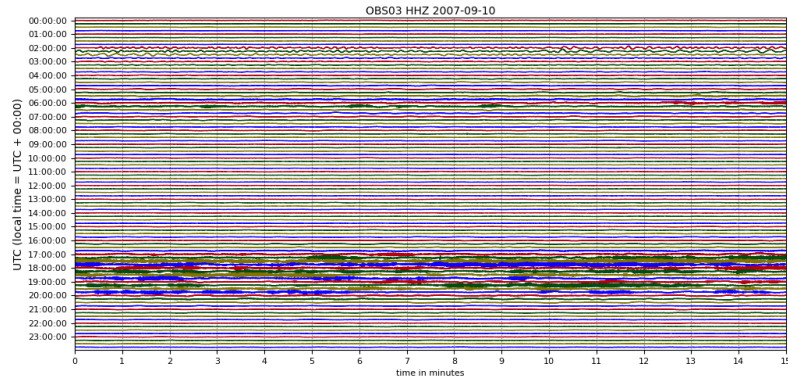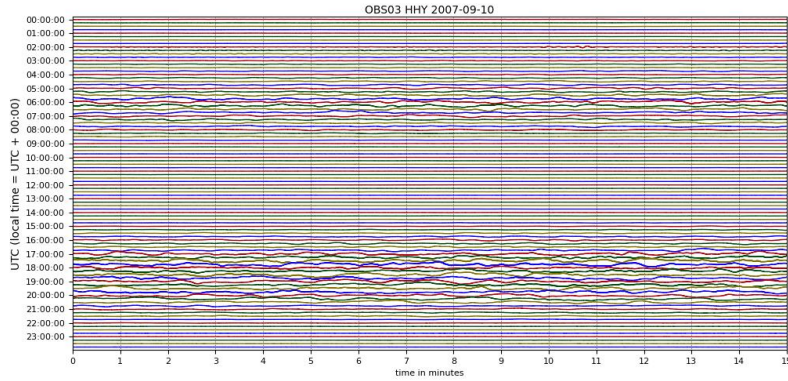

2007-09-10T00:00:00.01 - 2007-09-11T00:00:00.01

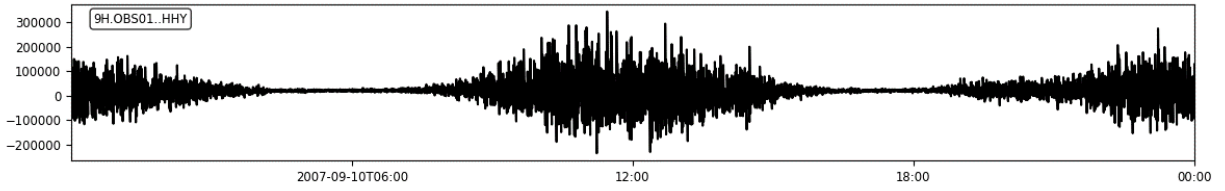

2007-09-10T00:00:00.01 - 2007-09-11T00:00:00.01

**Acc(m/s<sup>2</sup>) Filter[0.5-10]Hz**

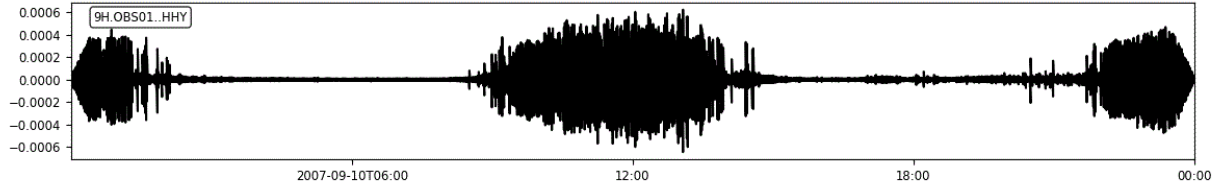

2007-09-10T00:00:00.01 - 2007-09-11T00:00:00.01

**Acc(m/s<sup>2</sup>) Filter[0.0167-0.1]Hz**

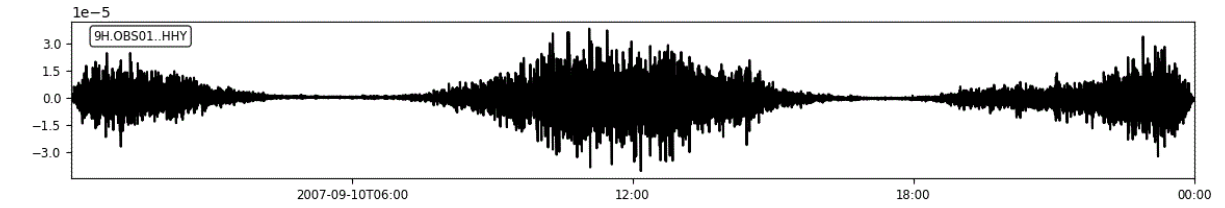

2007-09-10T00:00:00.03 - 2007-09-11T00:00:00.02

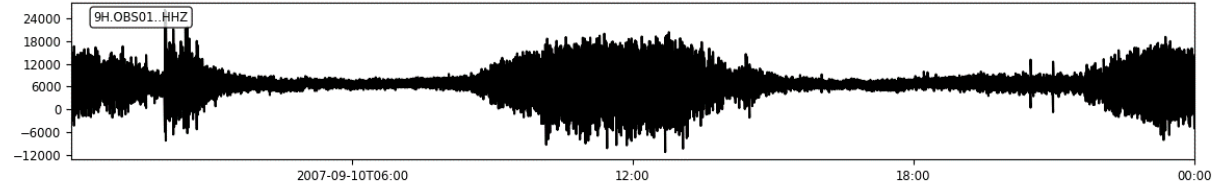

2007-09-10T00:00:00.03 - 2007-09-11T00:00:00.02

**Acc(m/s<sup>2</sup>) Filter[0.5-10]Hz**

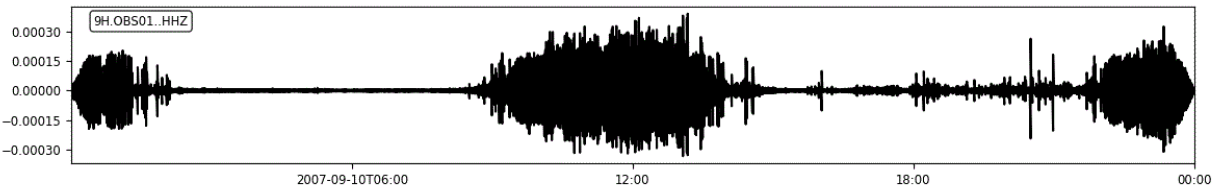

2007-09-10T00:00:00.03 - 2007-09-11T00:00:00.02

**Acc(m/s<sup>2</sup>) Filter[0.0167-0.1]Hz**

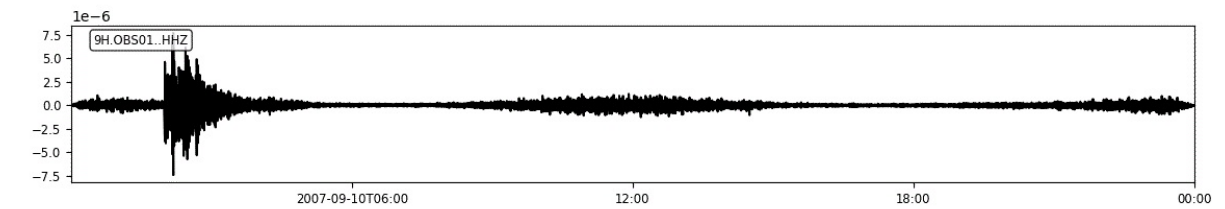

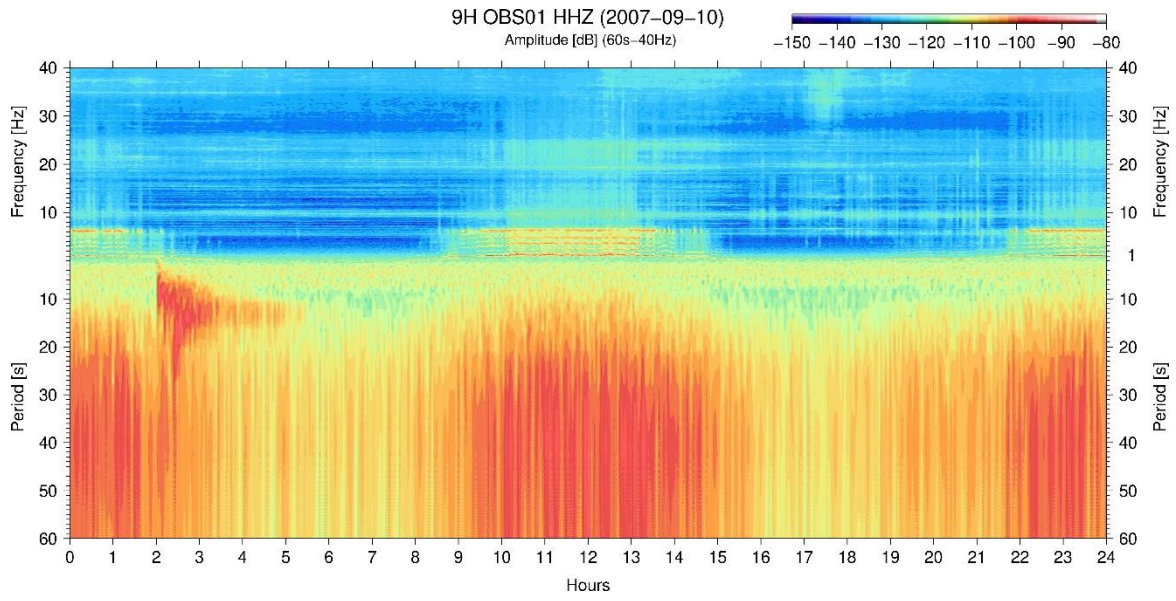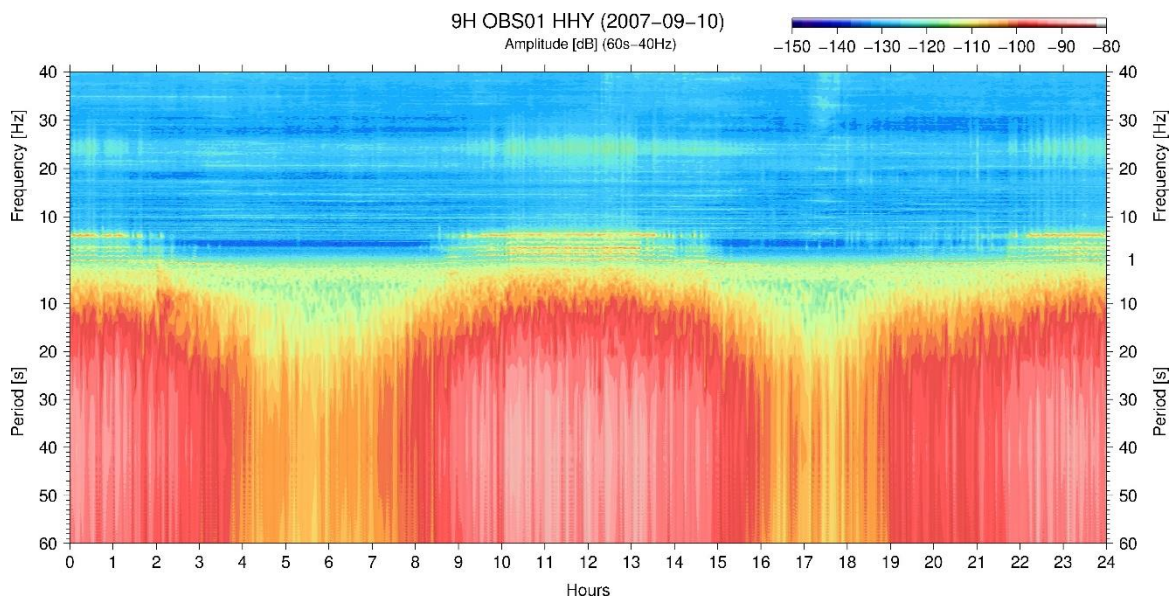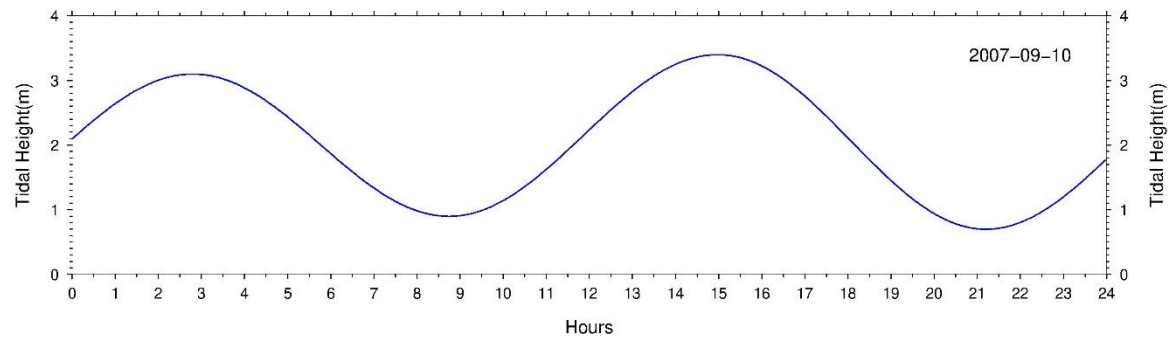

2007-09-10T00:00:00.03 - 2007-09-11T00:00:00.02

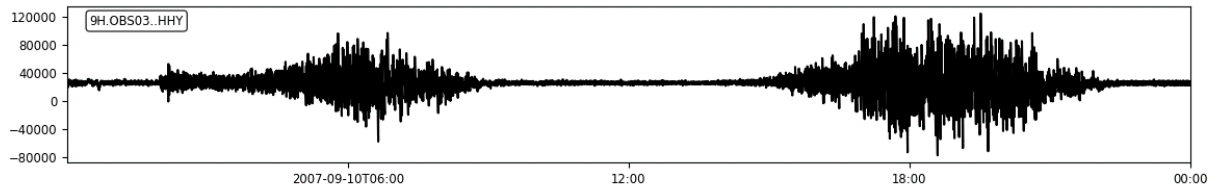

2007-09-10T00:00:00.03 - 2007-09-11T00:00:00.02

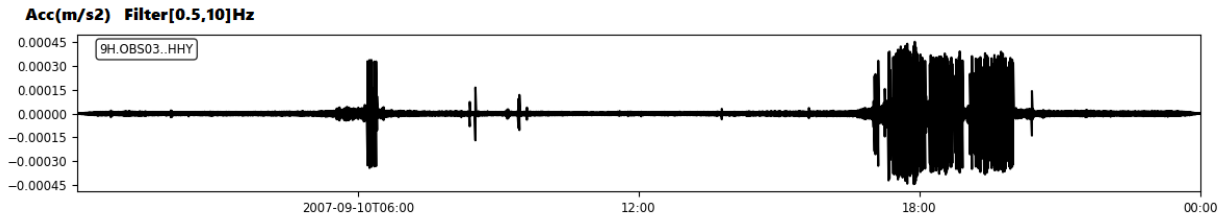

2007-09-10T00:00:00.03 - 2007-09-11T00:00:00.02

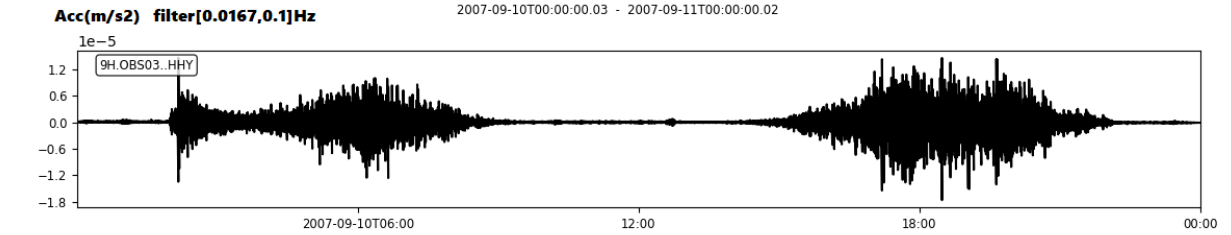

2007-09-10T00:00:00.02 - 2007-09-11T00:00:00.01

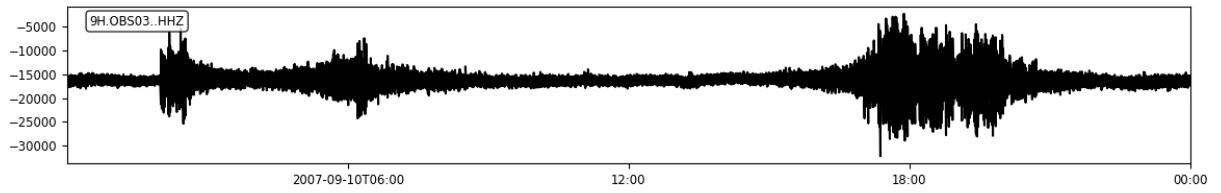

2007-09-10T00:00:00.02 - 2007-09-11T00:00:00.01

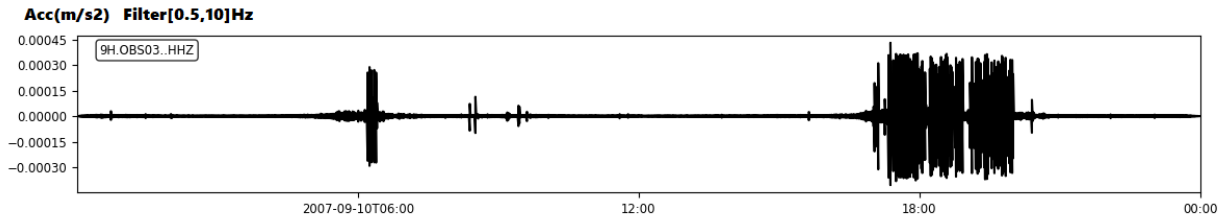

2007-09-10T00:00:00.02 - 2007-09-11T00:00:00.01

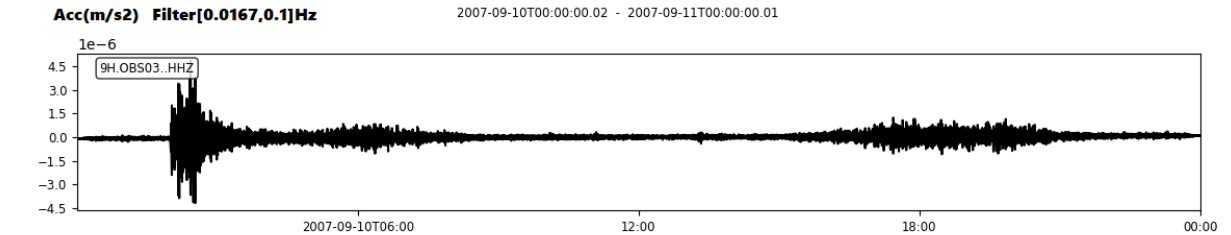



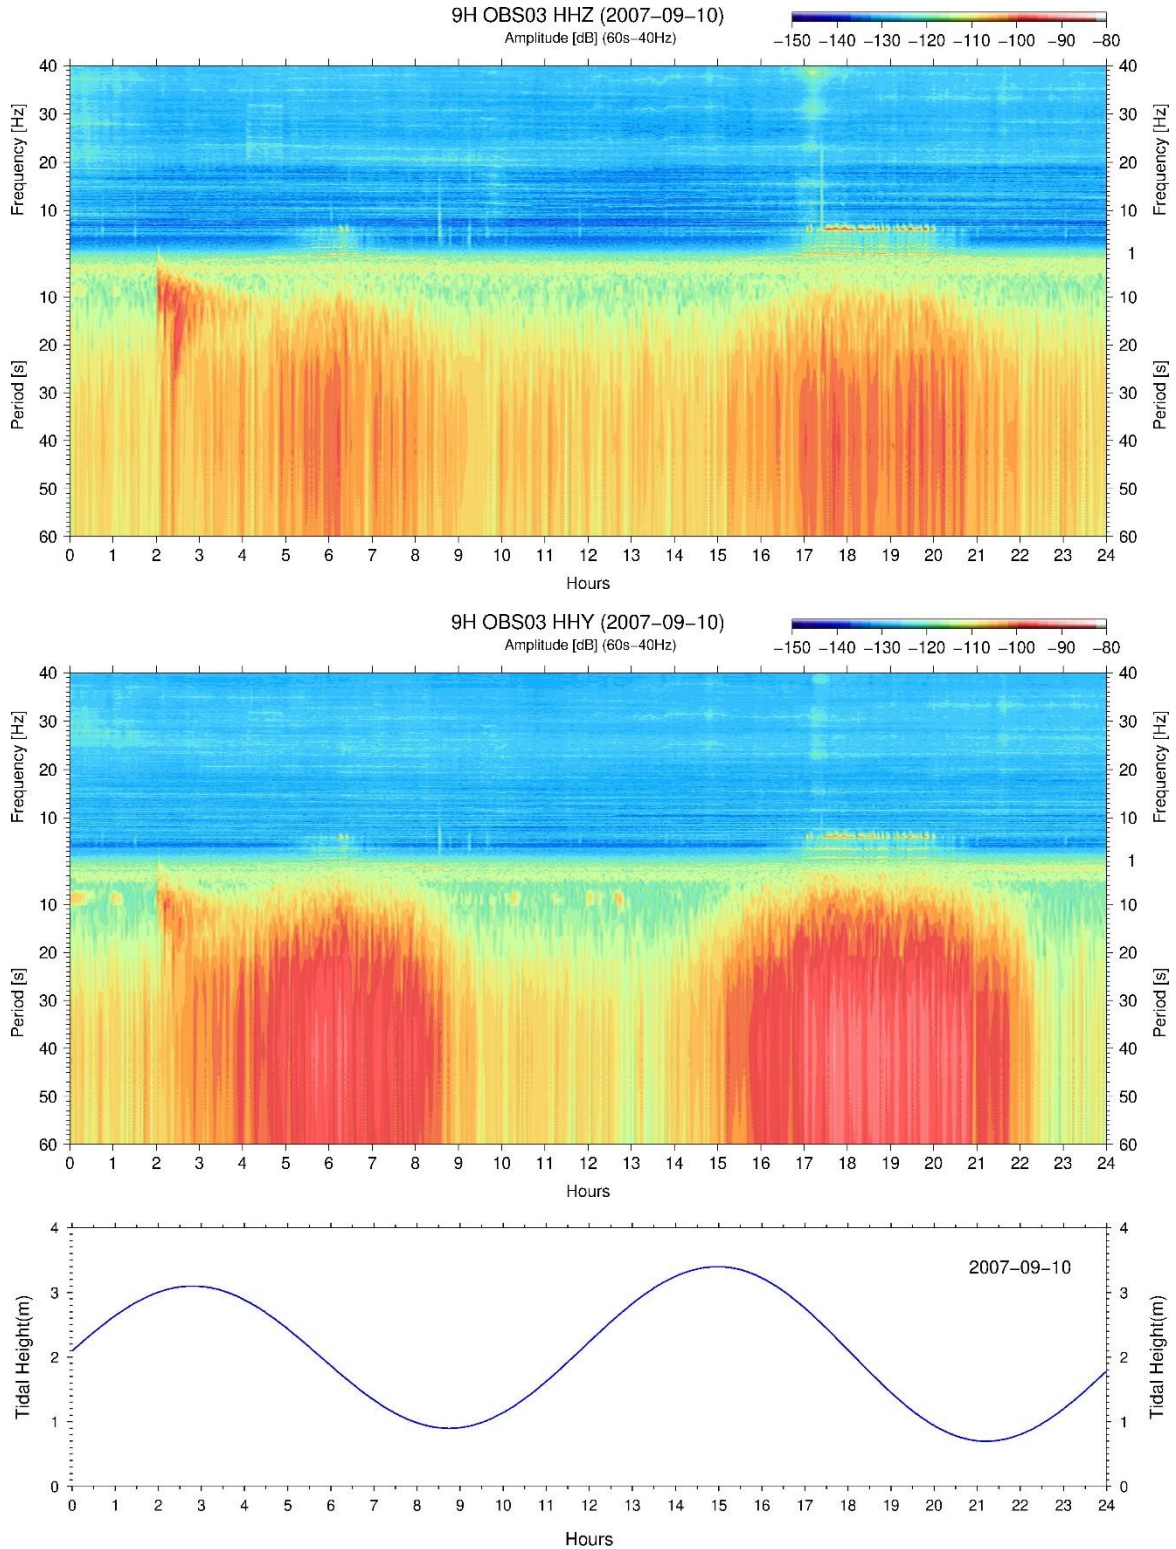

**Figure S1 | OBS01-OBS03 2007-09-10** – Day plot, the raw waveform in counts of the vertical Z and horizontal Y components, signals been corrected for instrument response to show acceleration ( $m/s^2$ ) and filtered in the short and long period band, spectrogram and tide height of Sines (maximum tidal range of 2.8m). The several plots show an earthquake (Colombia: origin time: 01:53:37 with  $M_w$  of 6.8), the effect of tilt noise (20-60s) and harmonic tremor (0.7-6Hz).

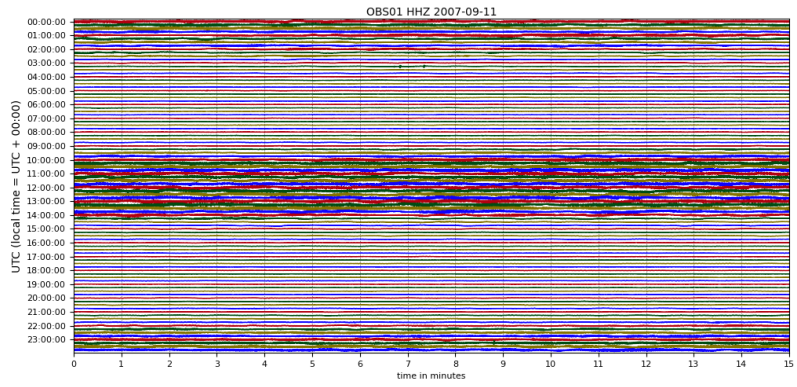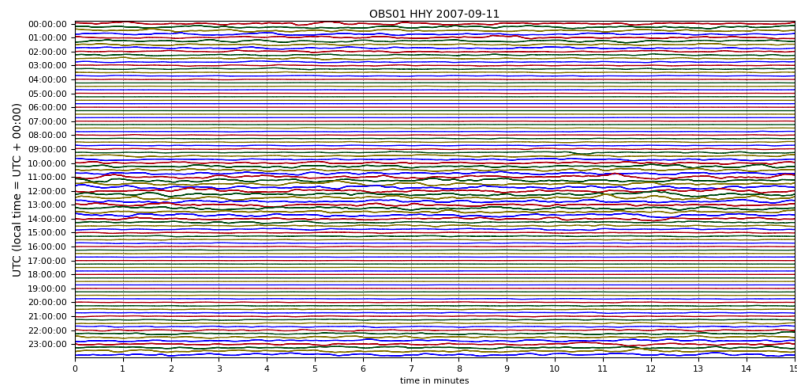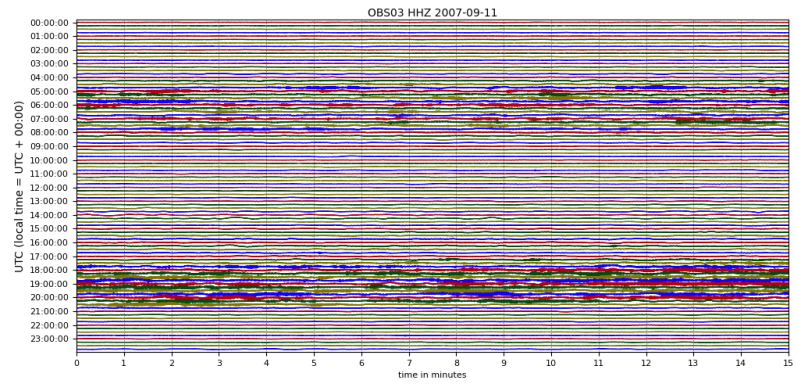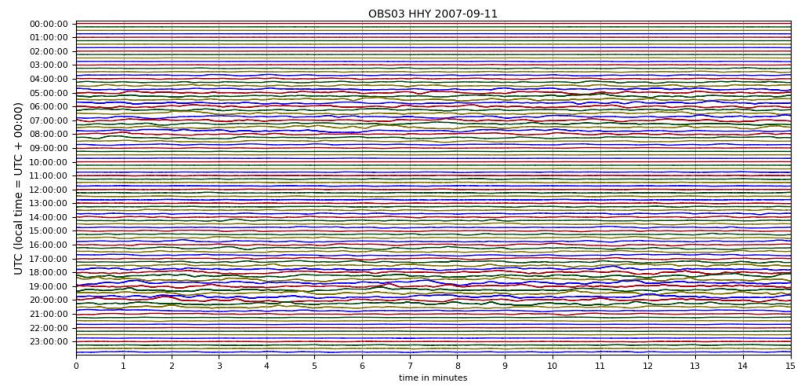

2007-09-11T00:00:00.02 - 2007-09-12T00:00:00

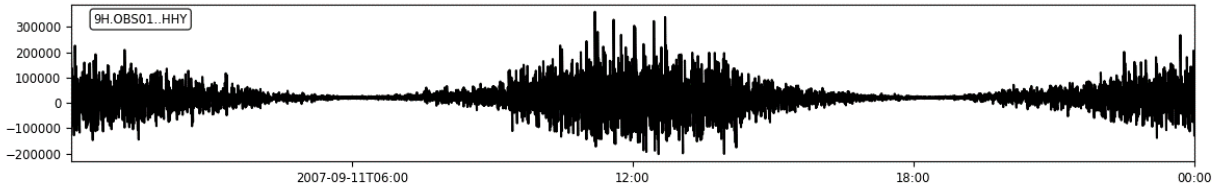

**Acc(m/s<sup>2</sup>) Filter[0.5-10]Hz**

2007-09-11T00:00:00.02 - 2007-09-12T00:00:00

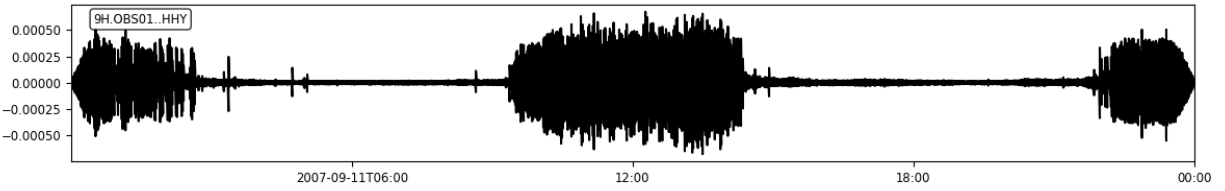

**Acc(m/s<sup>2</sup>) Filter[0.0167-0.1]Hz**

2007-09-11T00:00:00.02 - 2007-09-12T00:00:00

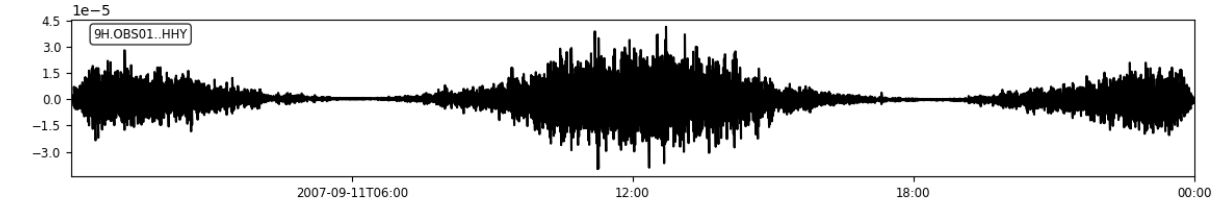

2007-09-11T00:00:00.03 - 2007-09-12T00:00:00.02

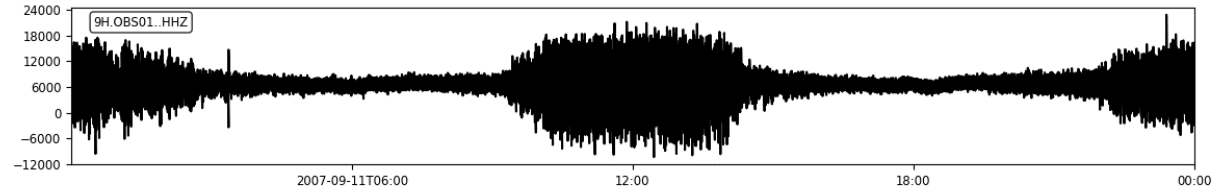

**Acc(m/s<sup>2</sup>) Filter[0.5-10]Hz**

2007-09-11T00:00:00.03 - 2007-09-12T00:00:00.02

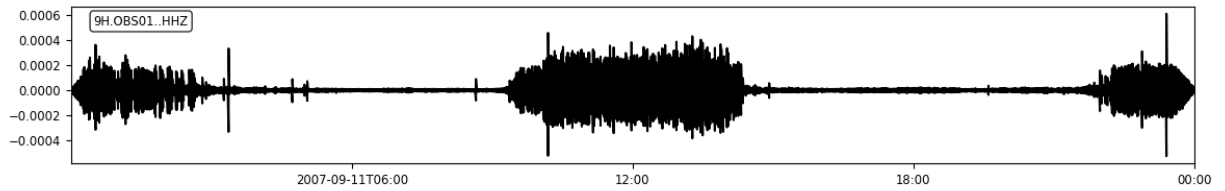

**Acc(m/s<sup>2</sup>) Filter[0.0167-0.1]Hz**

2007-09-11T00:00:00.03 - 2007-09-12T00:00:00.02

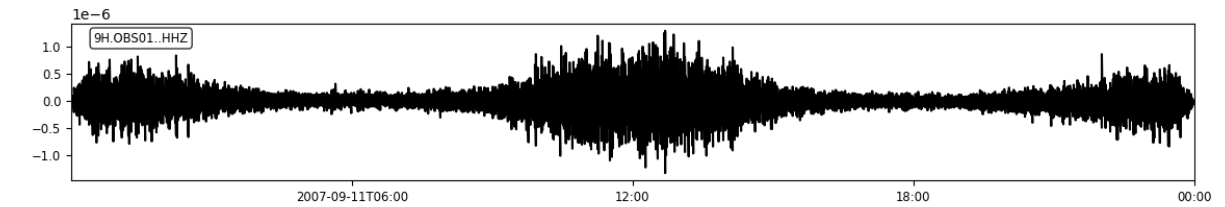

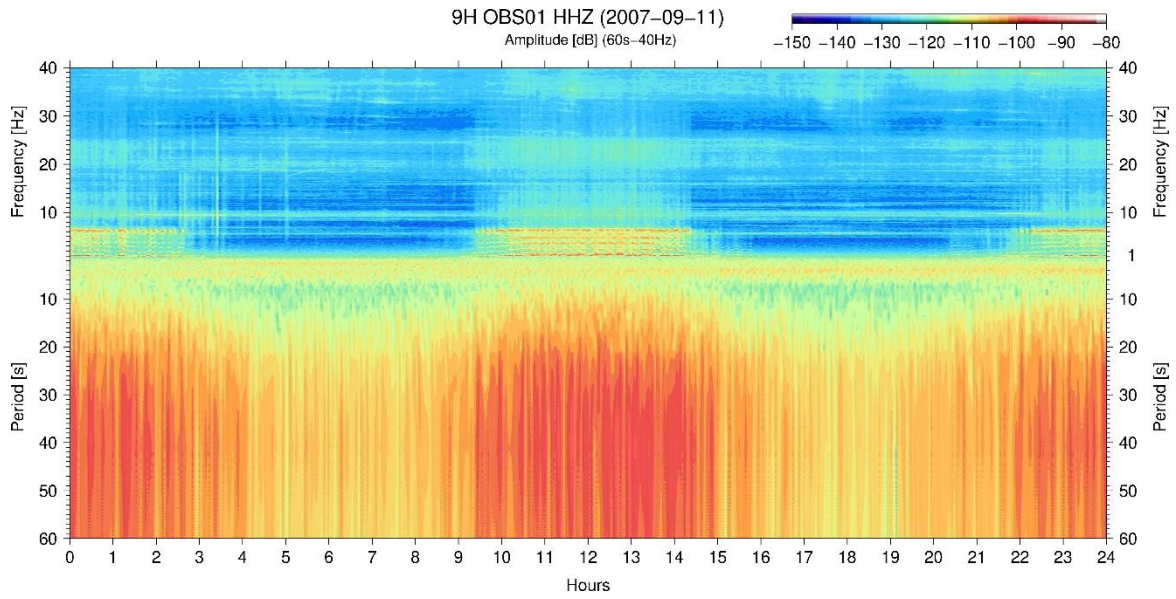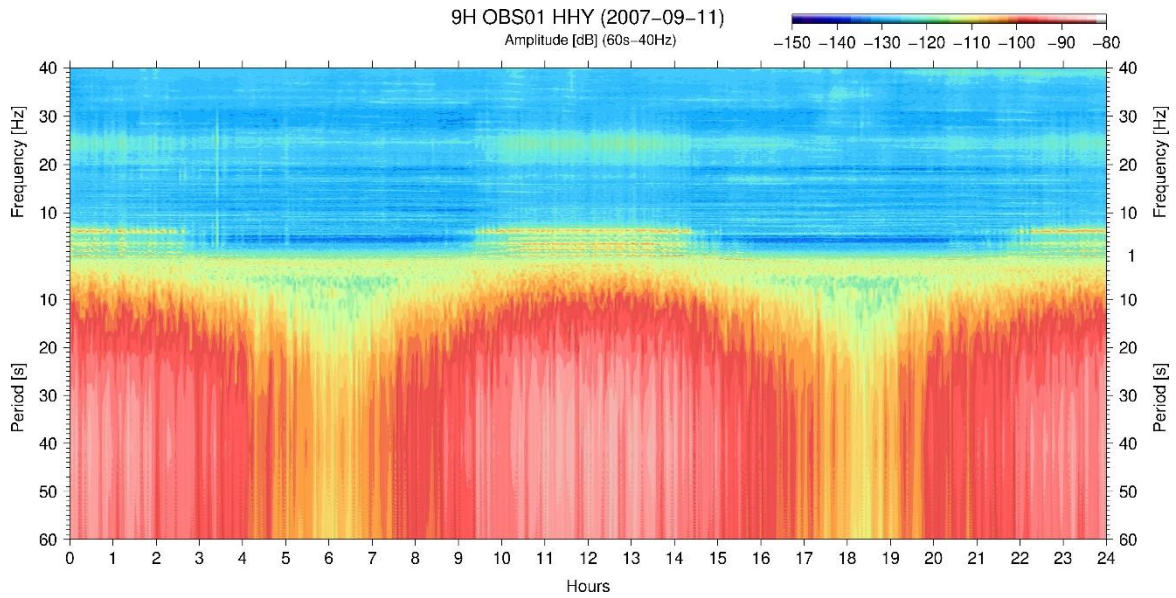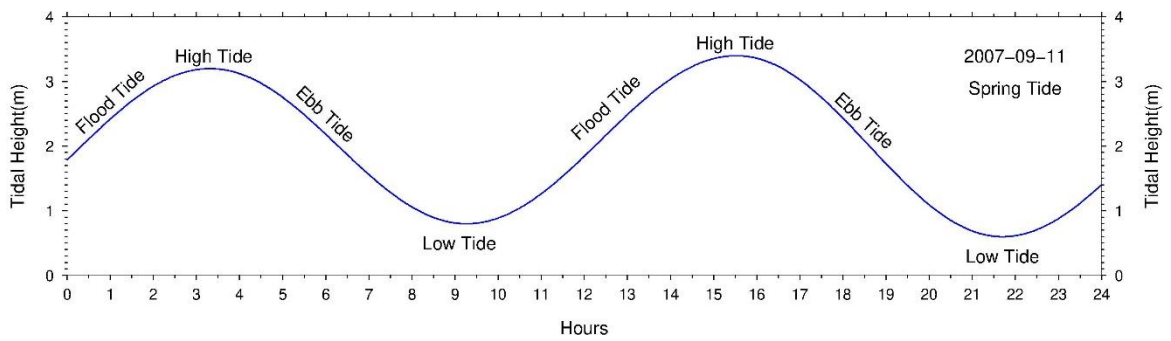

2007-09-11T00:00:00.03 - 2007-09-12T00:00:00.02

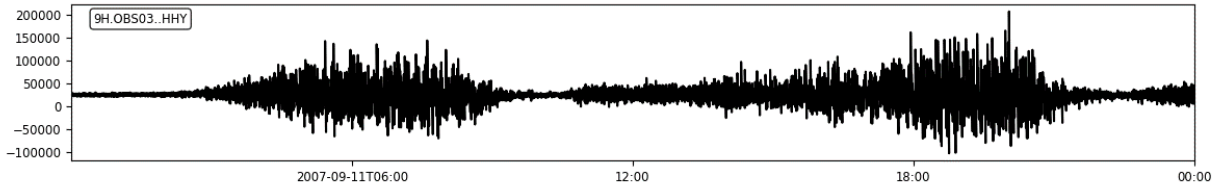

2007-09-11T00:00:00.03 - 2007-09-12T00:00:00.02

**Acc(m/s<sup>2</sup>) Filter[0.5,10]Hz**

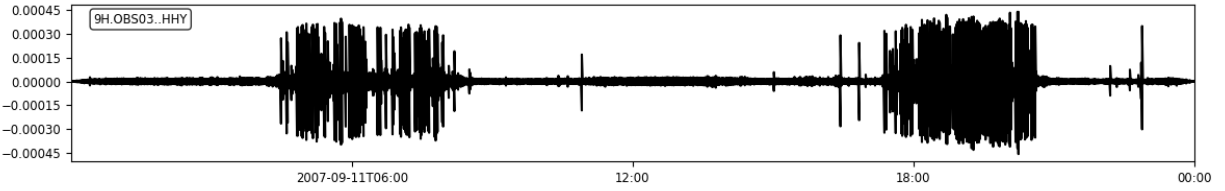

2007-09-11T00:00:00.03 - 2007-09-12T00:00:00.02

**Acc(m/s<sup>2</sup>) Filter[0.0167,0.1]Hz**

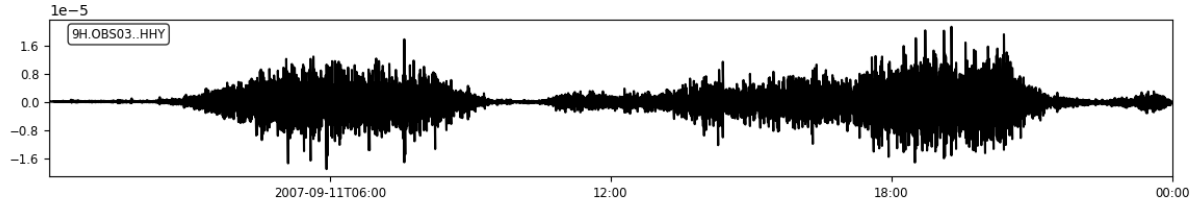

2007-09-11T00:00:00.02 - 2007-09-11T23:59:59.99

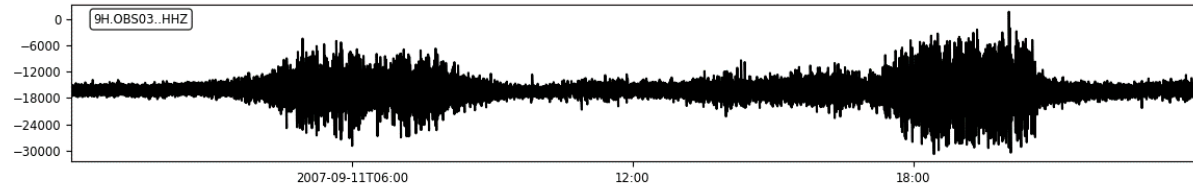

2007-09-11T00:00:00.02 - 2007-09-11T23:59:59.99

**Acc(m/s<sup>2</sup>) Filter[0.5,10]Hz**

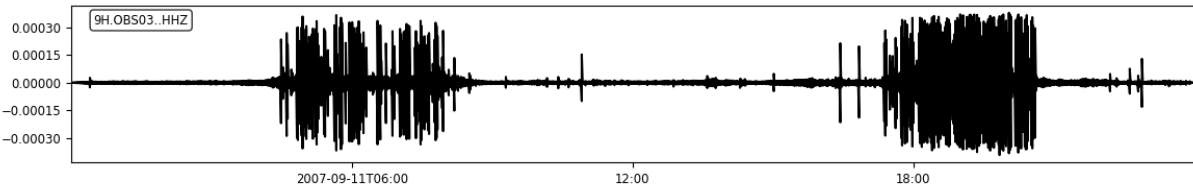

2007-09-11T00:00:00.02 - 2007-09-11T23:59:59.99

**Acc(m/s<sup>2</sup>) Filter[0.0167,0.1]Hz**

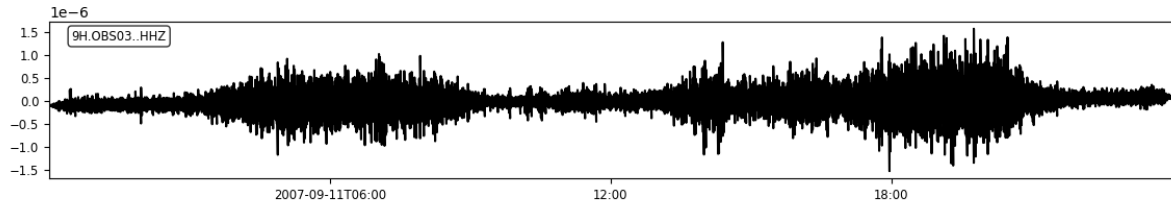

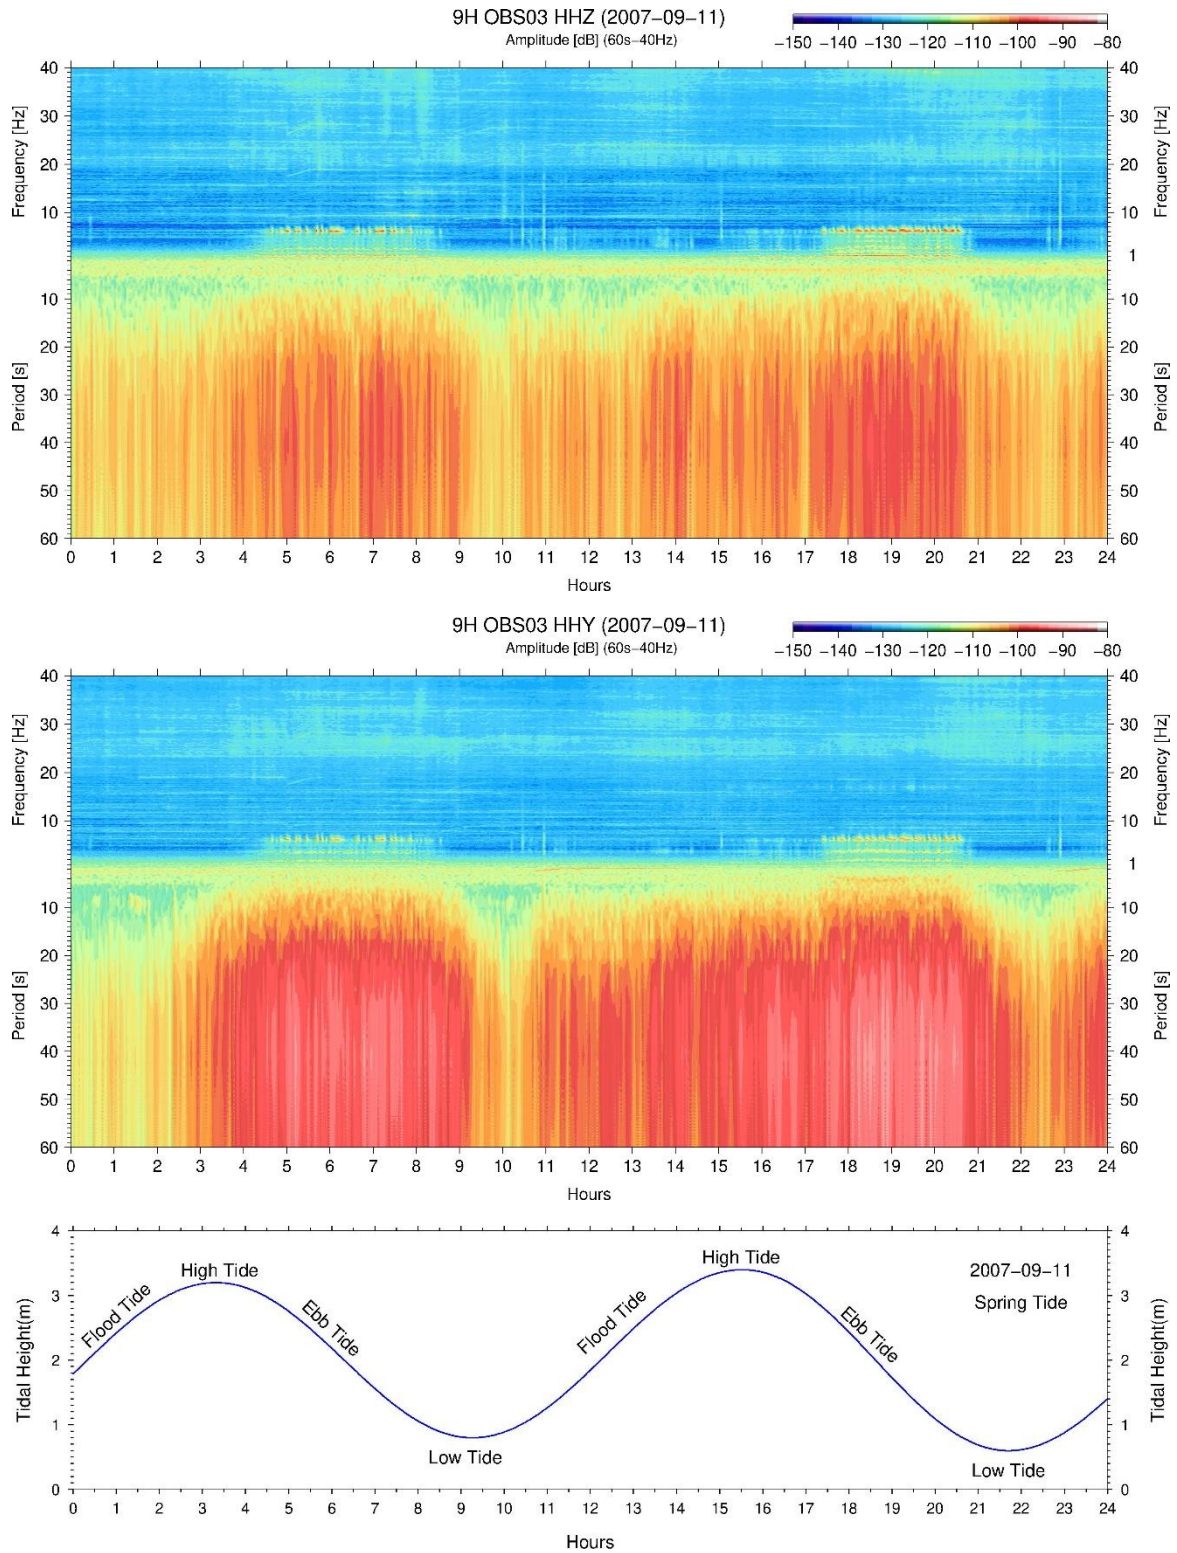

**Figure S2 | OBS01-OBS03 2007-09-11** – Day plot, the raw waveform in counts of the vertical Z and horizontal Y components, signals corrected for instrument response to show acceleration ( $m/s^2$ ) and filtered in the short and long period band, spectrogram and tide height of Sines (maximum tidal range of 2.9m), showing the effect of tilt noise (20-60s) and harmonic tremor (0.5-6Hz) during spring tide.

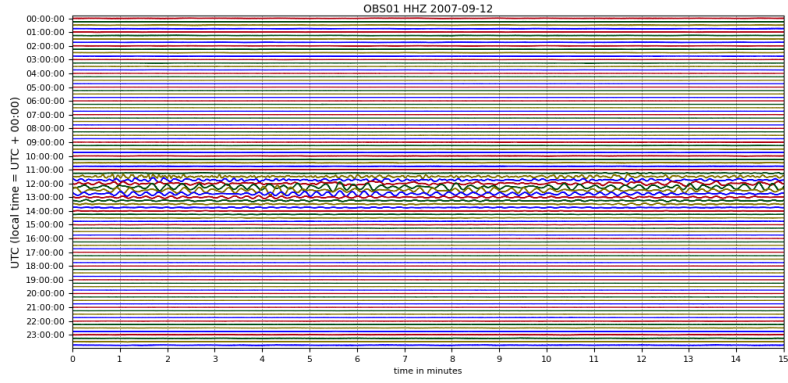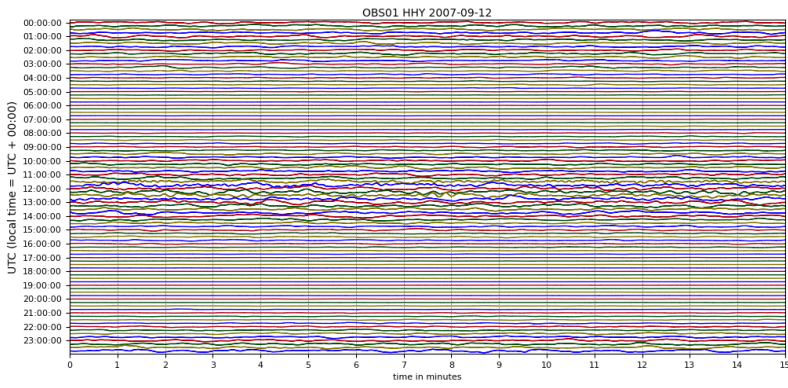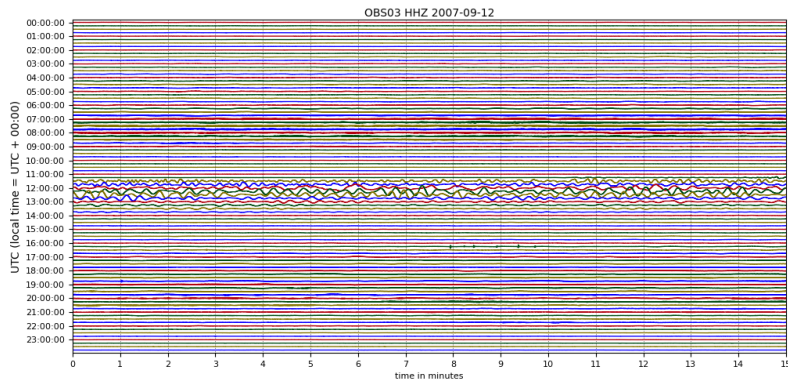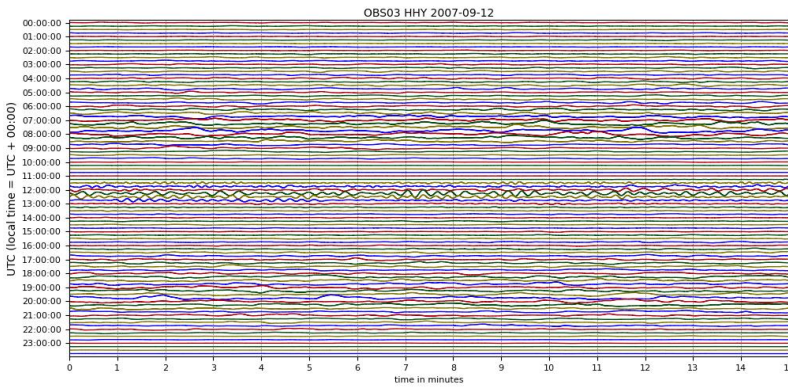

2007-09-12T00:00:00.01 - 2007-09-13T00:00:00.01

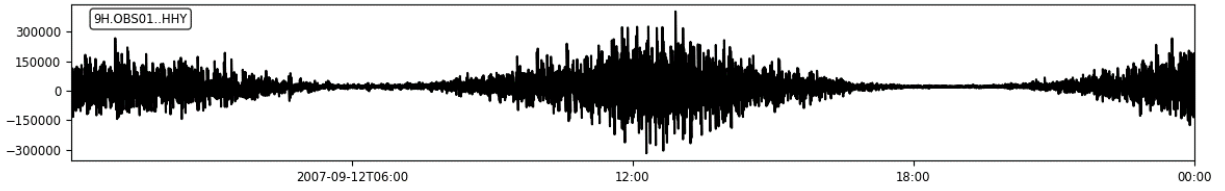

2007-09-12T00:00:00.01 - 2007-09-13T00:00:00.01

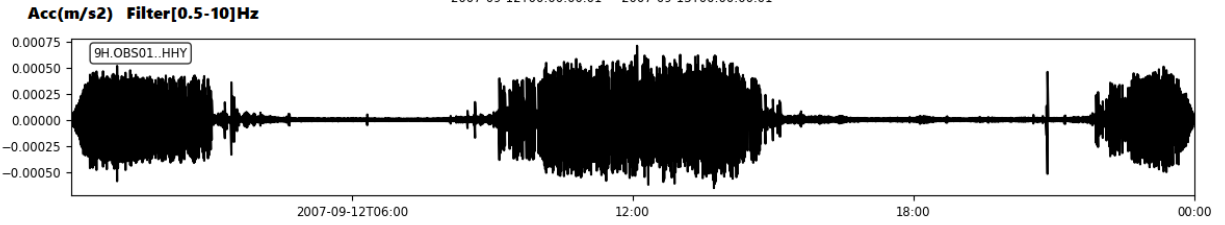

2007-09-12T00:00:00.01 - 2007-09-13T00:00:00.01

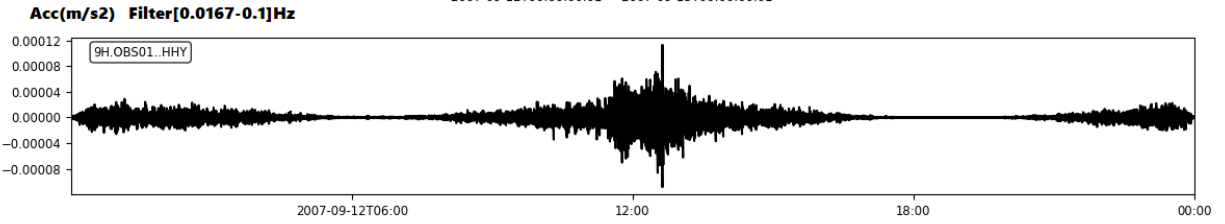

2007-09-12T00:00:00.03 - 2007-09-13T00:00:00.02

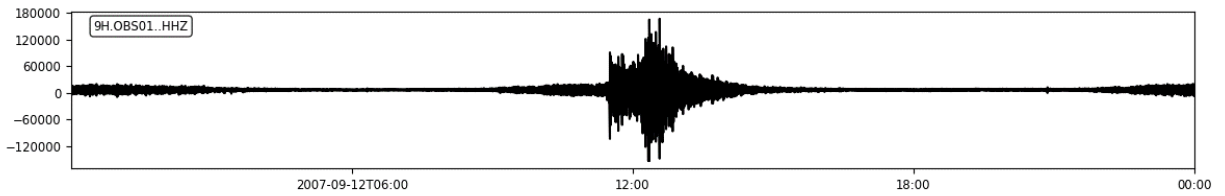

2007-09-12T00:00:00.03 - 2007-09-13T00:00:00.02

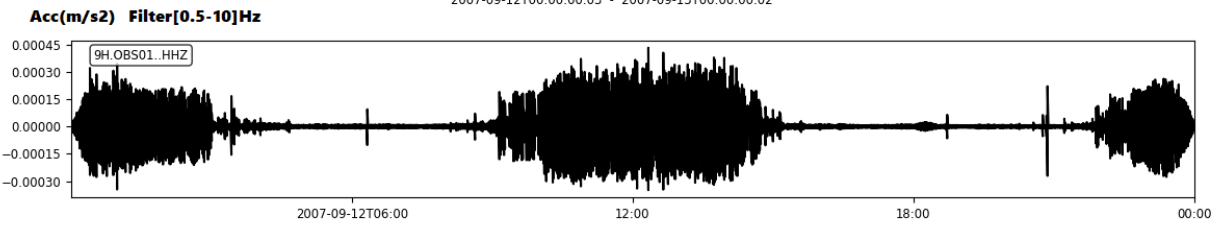

2007-09-12T00:00:00.03 - 2007-09-13T00:00:00.02

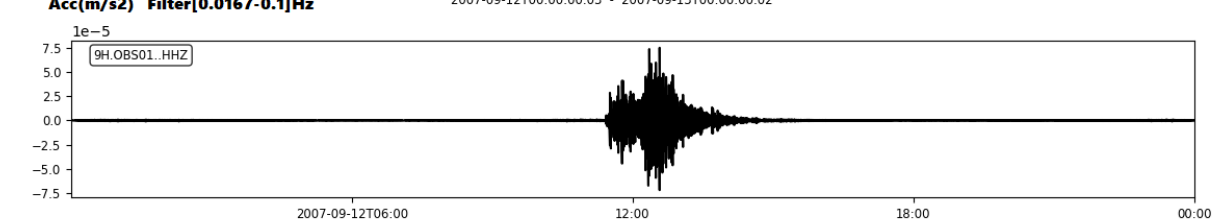



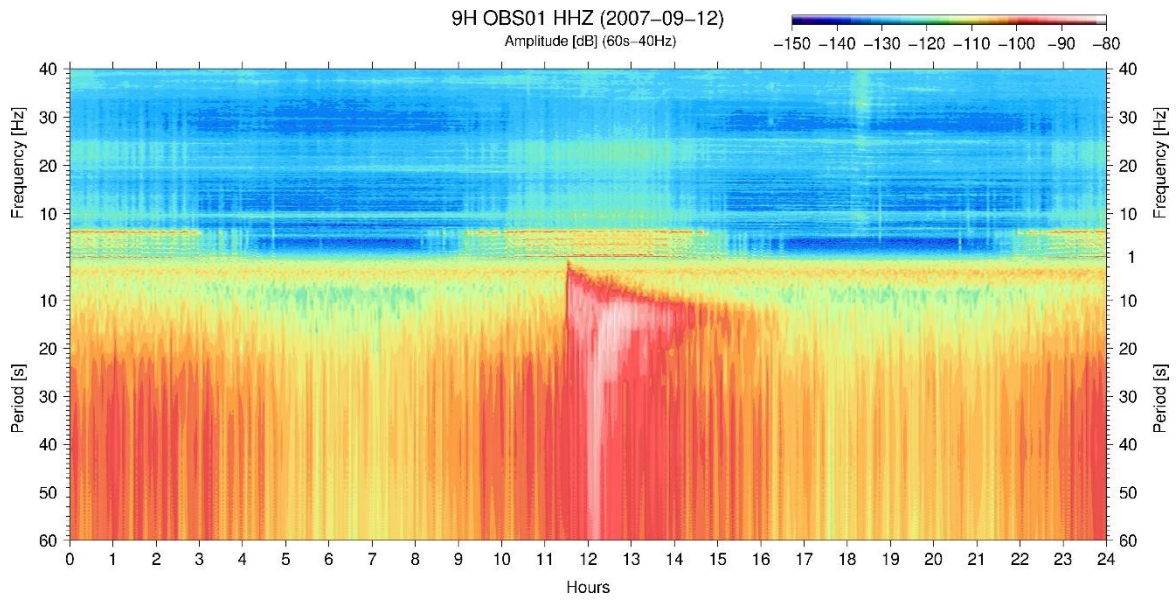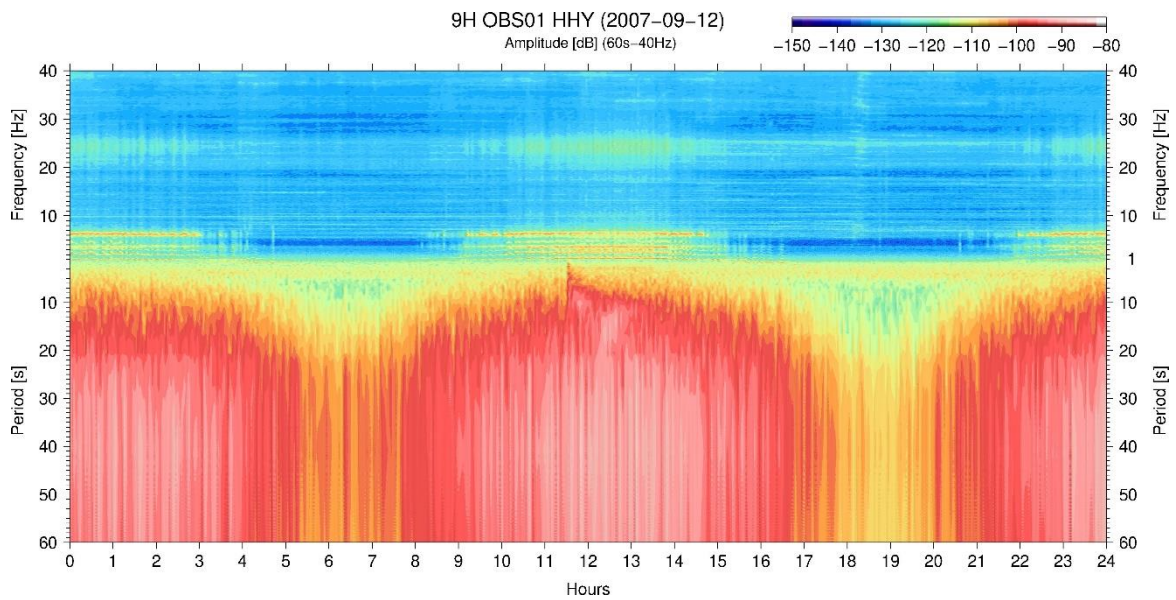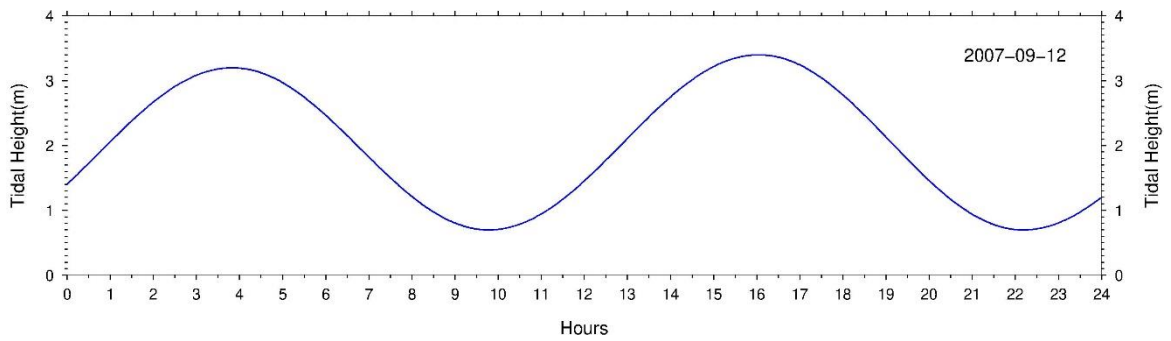

2007-09-12T00:00:00.03 - 2007-09-13T00:00:00.01

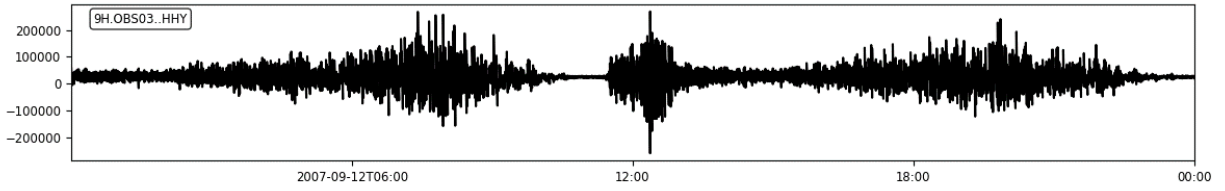

2007-09-12T00:00:00.03 - 2007-09-13T00:00:00.01

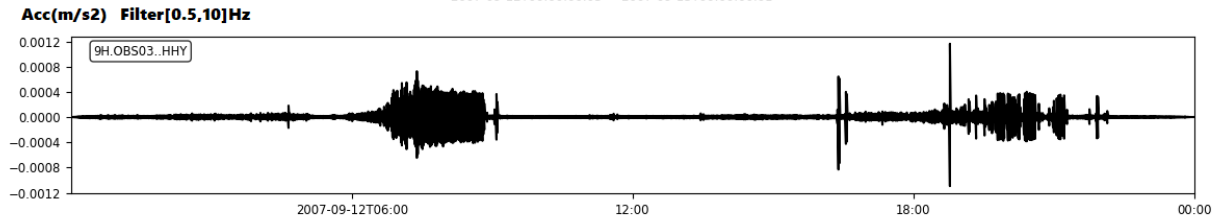

2007-09-12T00:00:00.03 - 2007-09-13T00:00:00.01

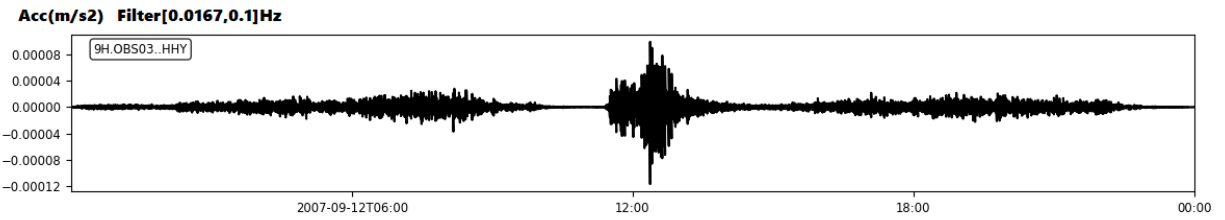

2007-09-12T00:00:00 - 2007-09-13T00:00:00.01

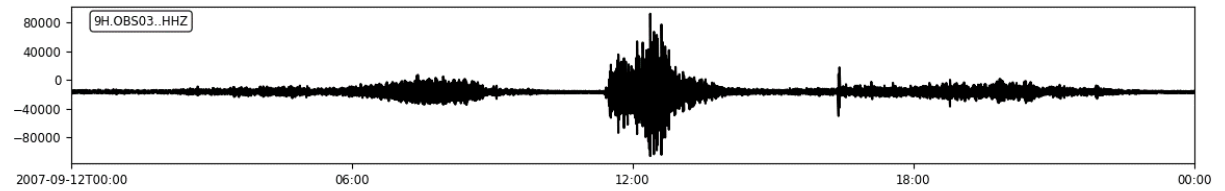

2007-09-12T00:00:00 - 2007-09-13T00:00:00.01

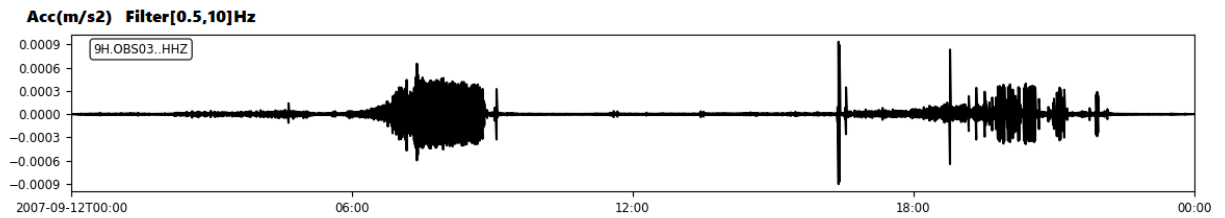

2007-09-12T00:00:00 - 2007-09-13T00:00:00.01

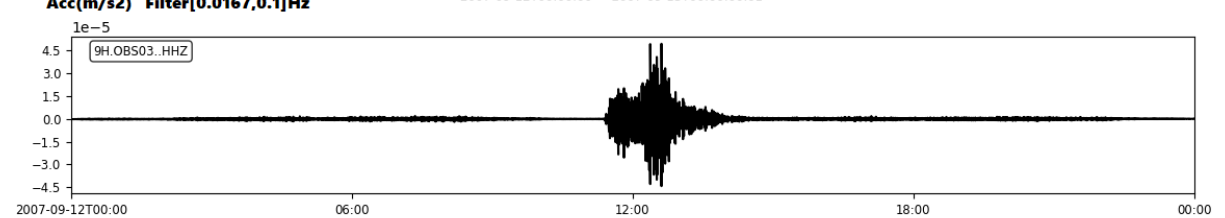

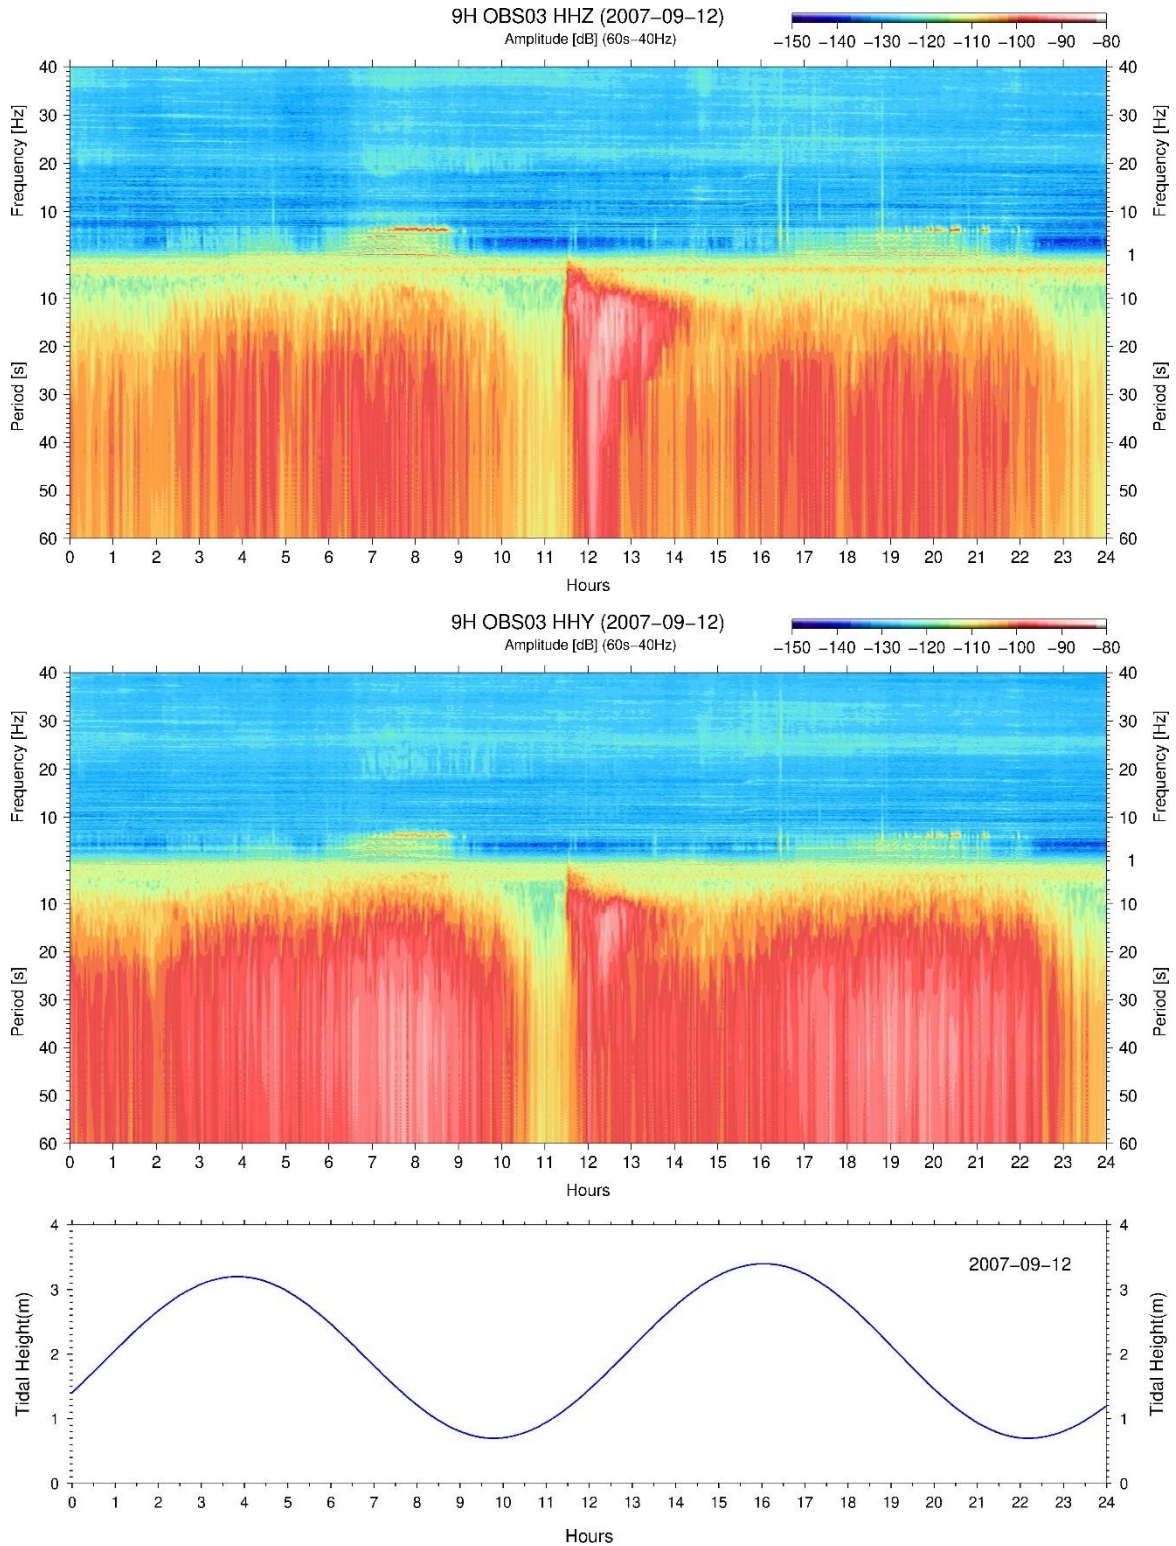

**Figure S3 | OBS01-OBS03 2007-09-12** – Day plot, the raw waveform, in counts, of vertical Z and horizontal Y components, signals corrected for instrument response to show acceleration ( $m/s^2$ ) and filtered in the short and long period band, spectrogram and tide height of Sines (maximum tidal range of 2.9m), showing a distant earthquake (Sumatra, Indonesia: origin time: 11:10:21 with  $M_w$  of 8.4), the effect of tilt noise (20-60s) and harmonic tremor (0.5-6Hz) during the spring tide.

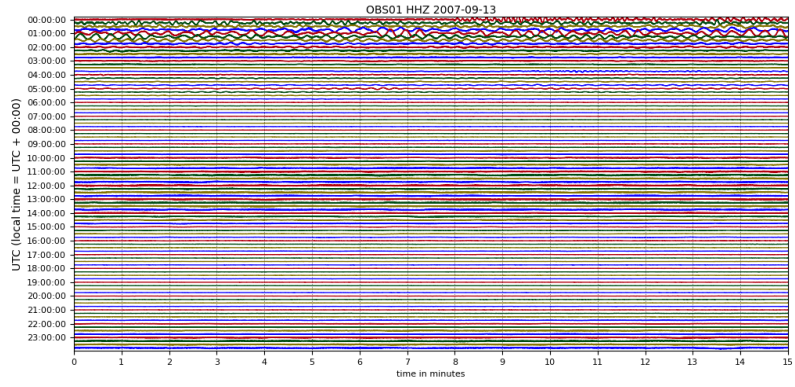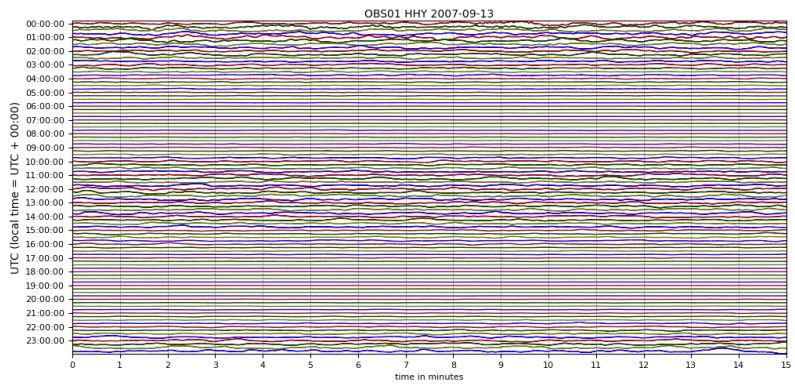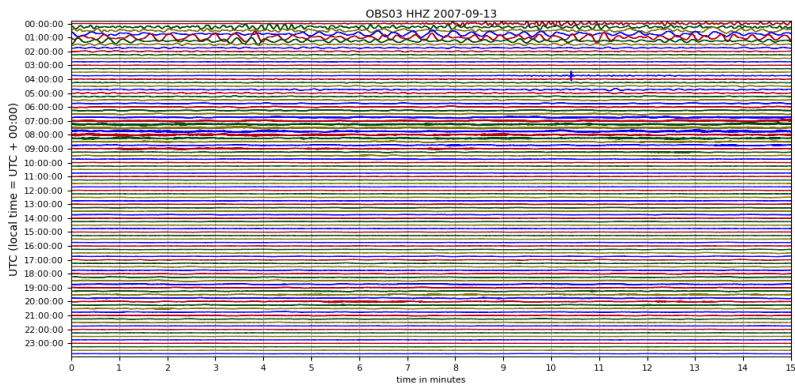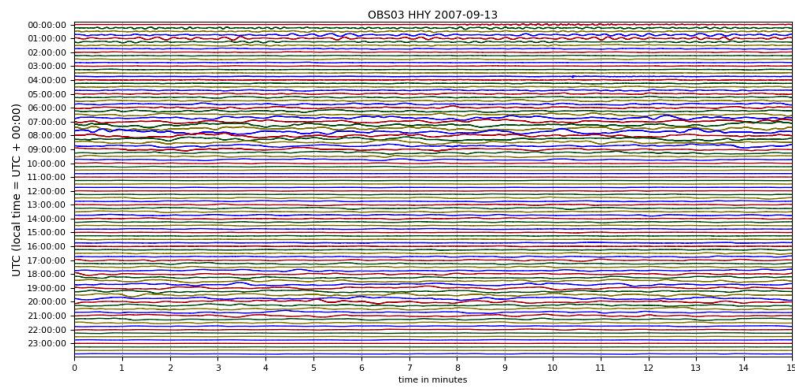

2007-09-13T00:00:00.02 - 2007-09-14T00:00:00.01

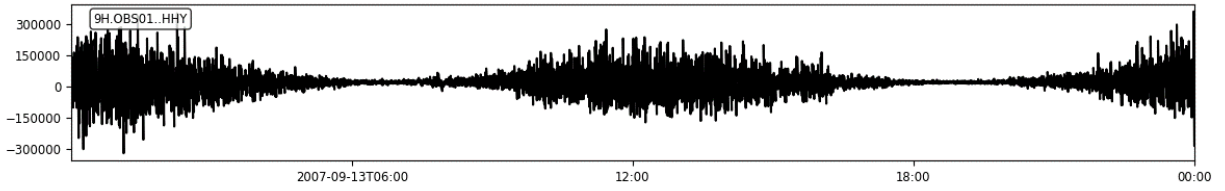

2007-09-13T00:00:00.02 - 2007-09-14T00:00:00.01

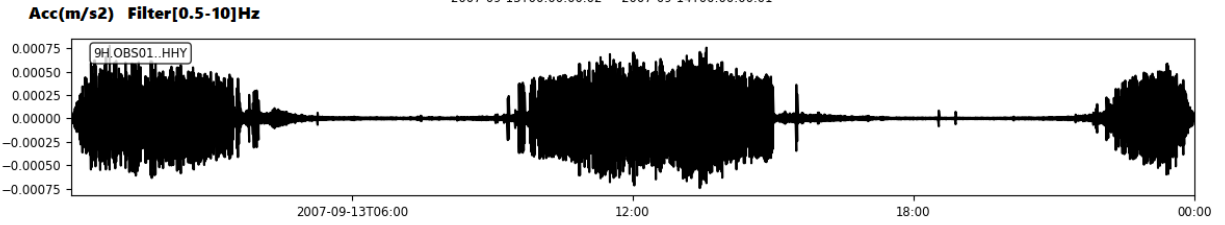

2007-09-13T00:00:00.02 - 2007-09-14T00:00:00.01

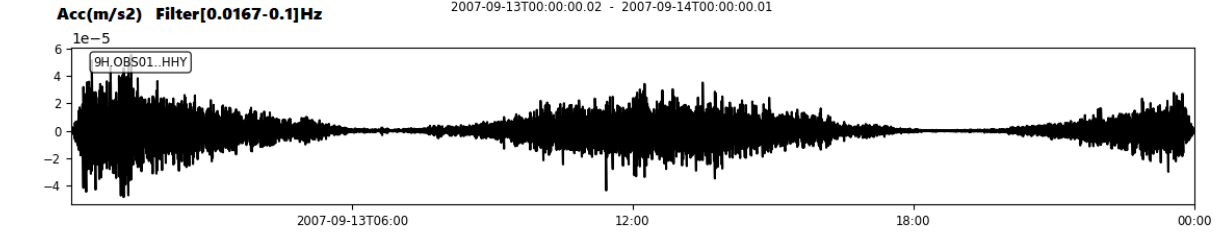

2007-09-13T00:00:00.03 - 2007-09-14T00:00:00.02

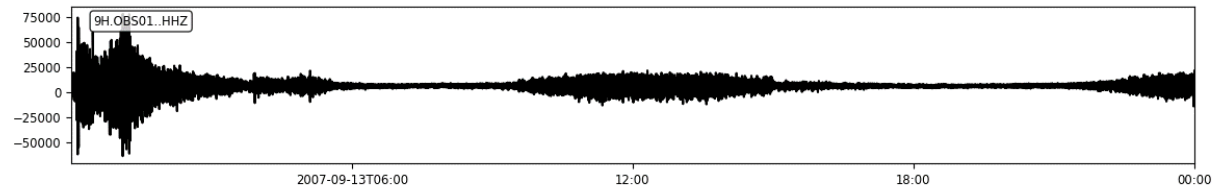

2007-09-13T00:00:00.03 - 2007-09-14T00:00:00.02

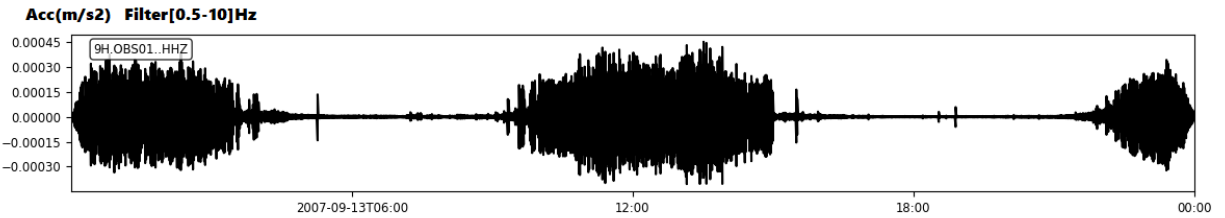

2007-09-13T00:00:00.03 - 2007-09-14T00:00:00.02

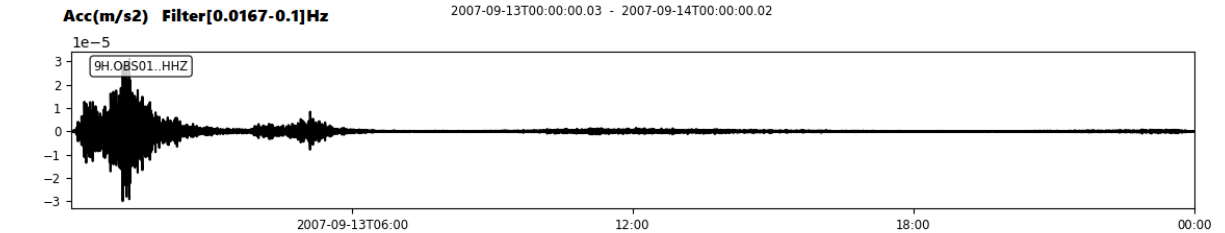

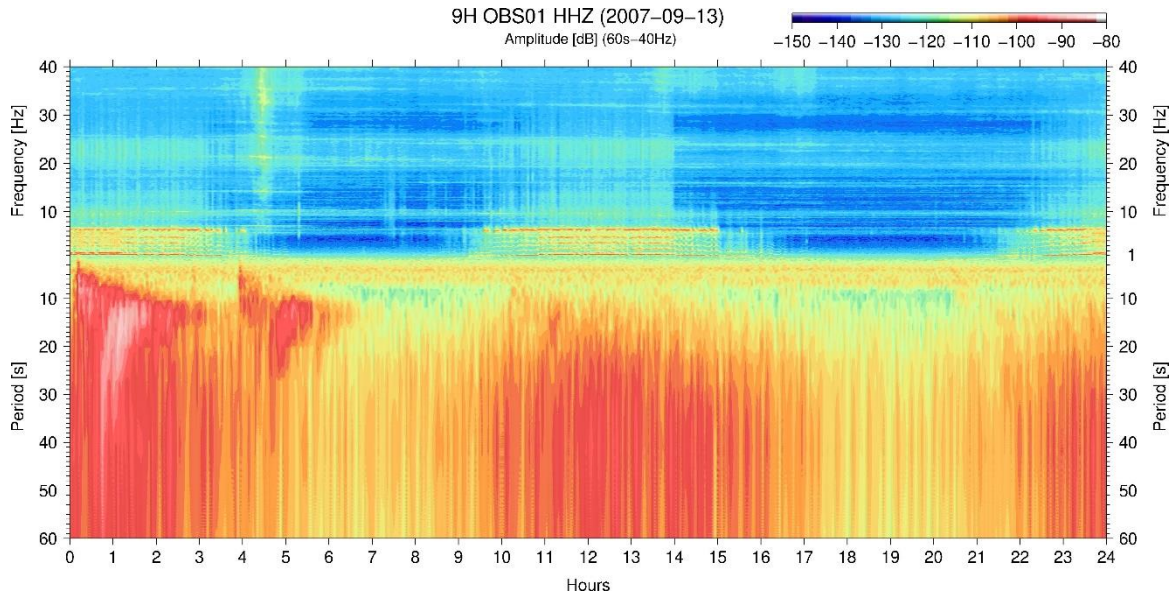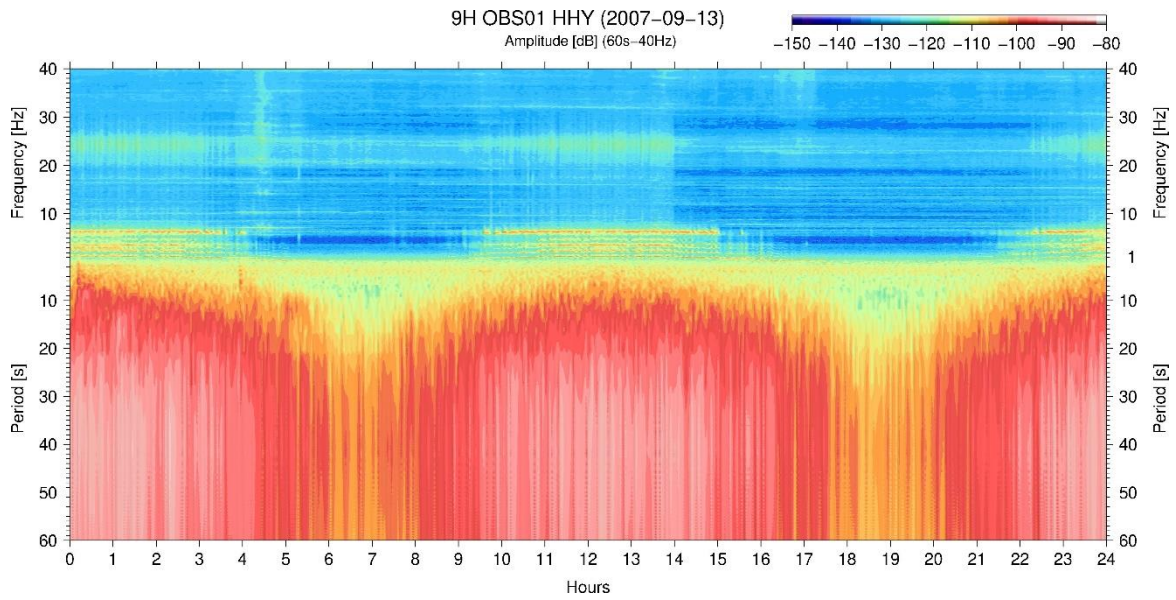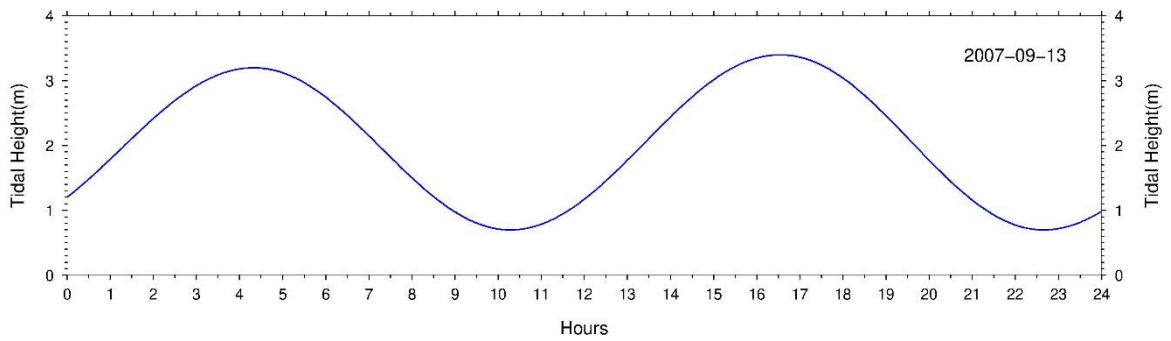

2007-09-13T00:00:00.02 - 2007-09-14T00:00:00.01

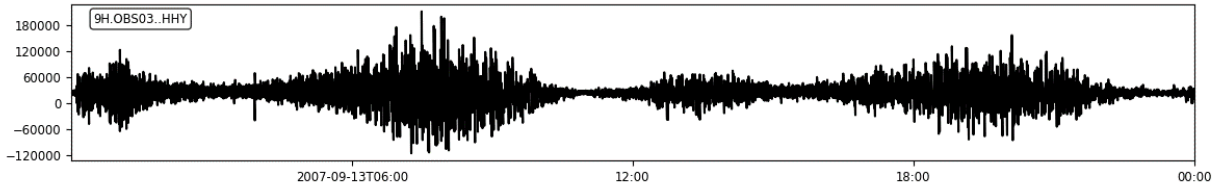

2007-09-13T00:00:00.02 - 2007-09-14T00:00:00.01

Acc(m/s<sup>2</sup>) Filter[0.5,10]Hz

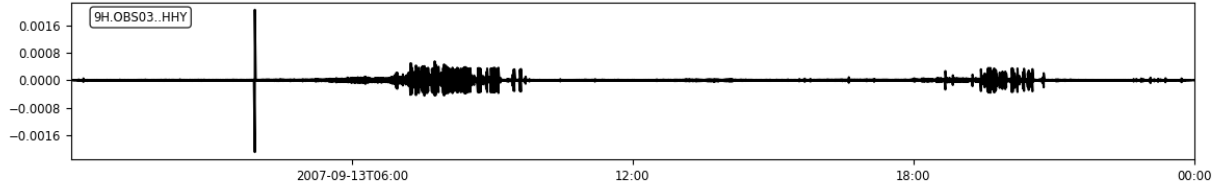

2007-09-13T00:00:00.02 - 2007-09-14T00:00:00.01

Acc(m/s<sup>2</sup>) Filter[0.0167,0.1]Hz

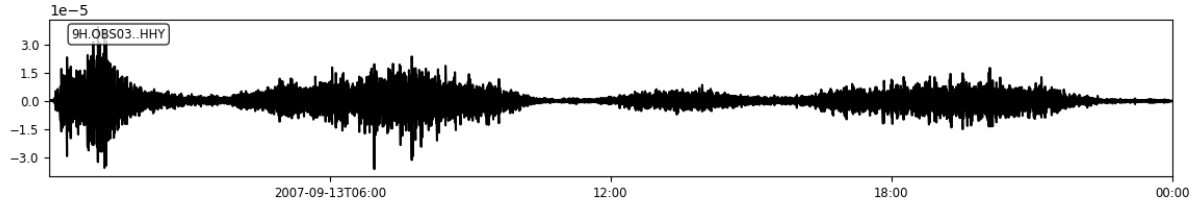

2007-09-13T00:00:00.02 - 2007-09-14T00:00:00.01

9H.OBS03..HHZ

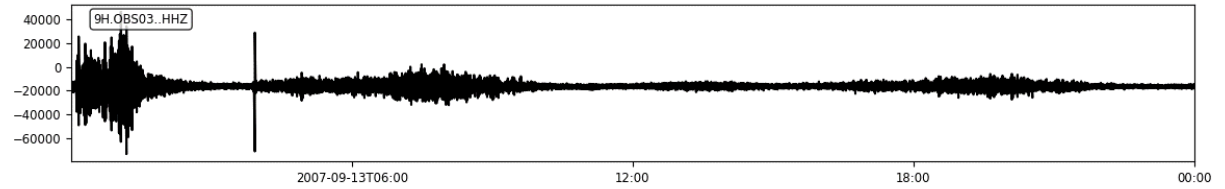

2007-09-13T00:00:00.02 - 2007-09-14T00:00:00.01

Acc(m/s<sup>2</sup>) Filter[0.5,10]Hz

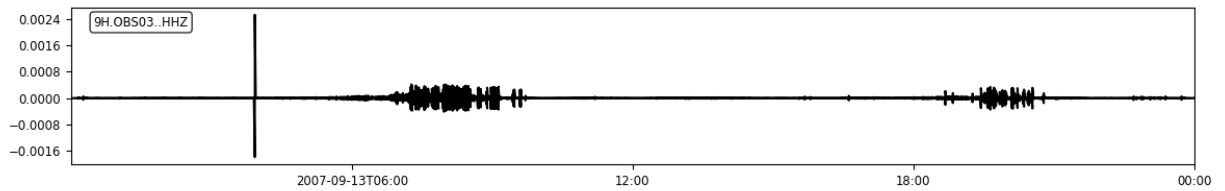

2007-09-13T00:00:00.02 - 2007-09-14T00:00:00.01

Acc(m/s<sup>2</sup>) Filter[0.0167,0.1]Hz

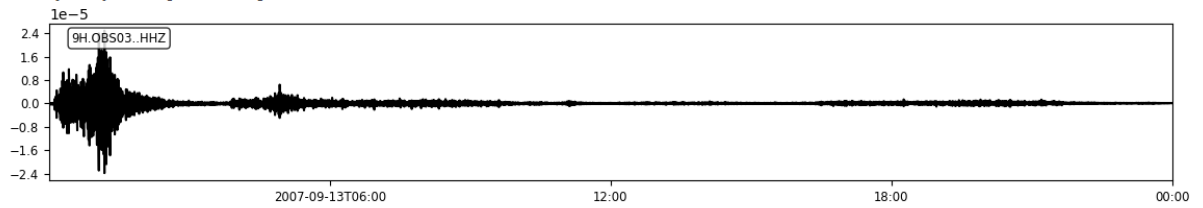

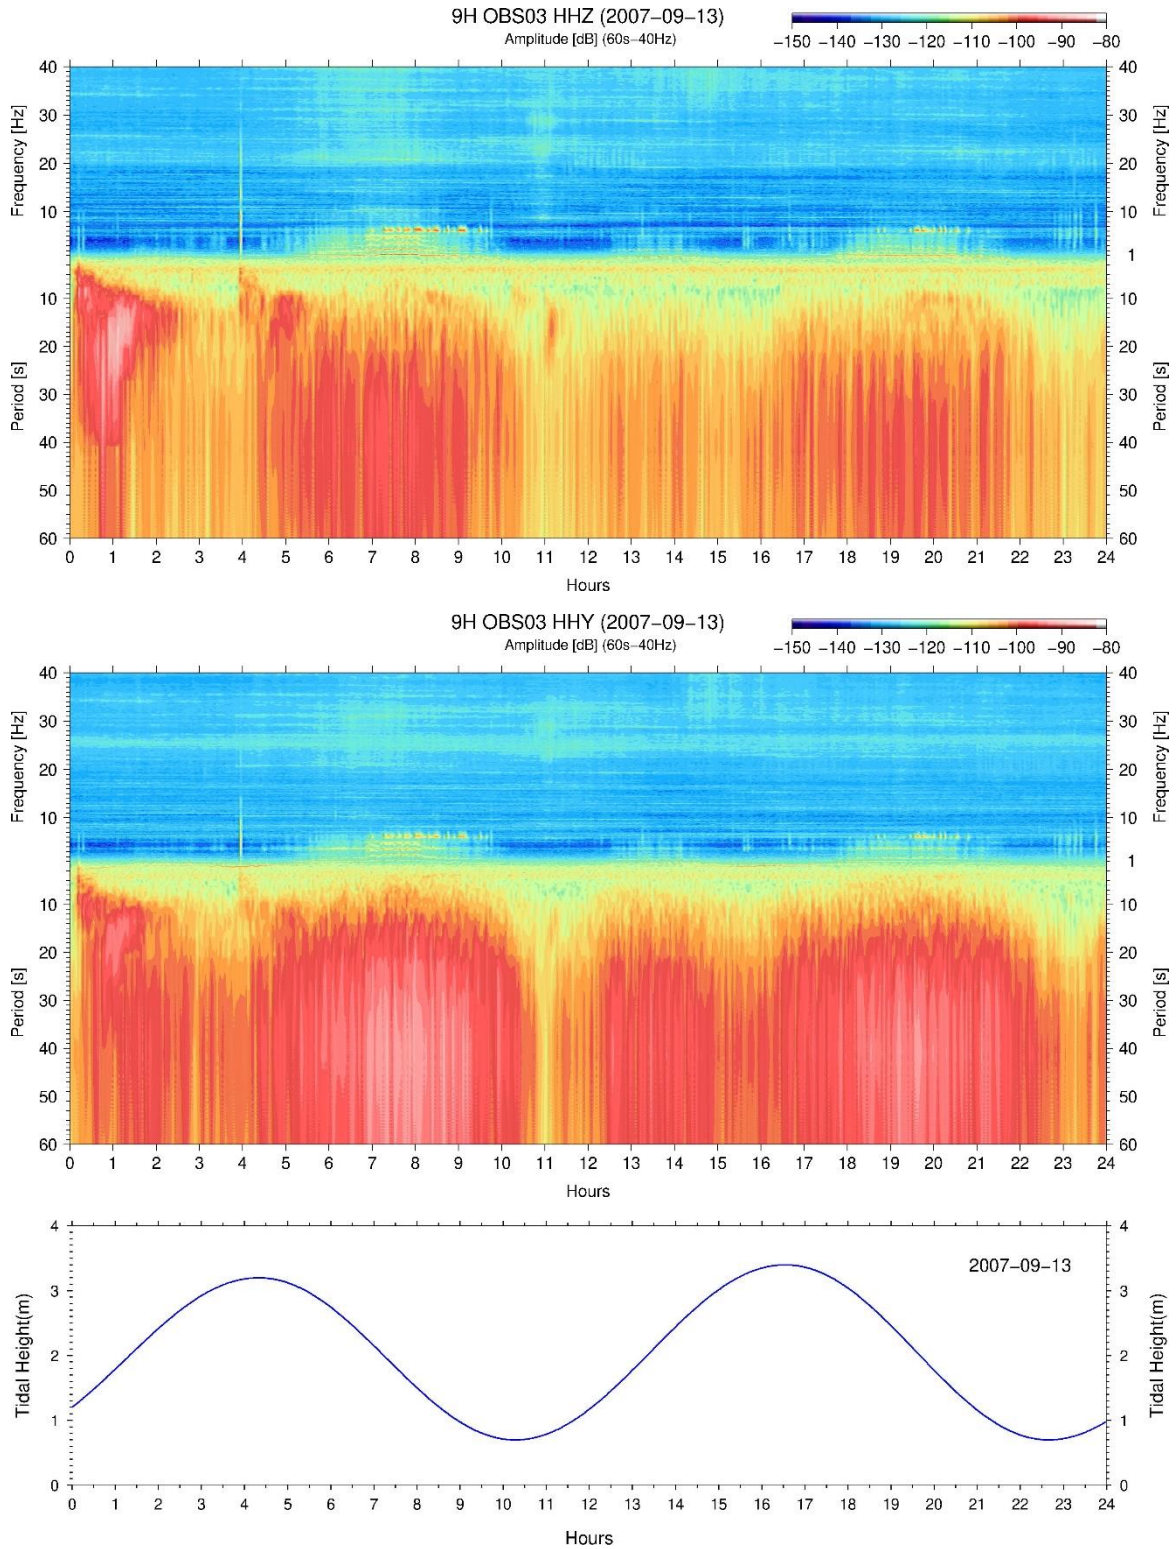

**Figure S4 | OBS01-OBS03 2007-09-13** – Day plot, the raw waveform in counts of the vertical Z and horizontal Y components, signals corrected for instrument response to show acceleration ( $m/s^2$ ) and filtered in the short and long period band, spectrogram and tide height of Sines (maximum tidal range of 2.7m), showing two distant earthquakes (Mentawai, Indonesia: origin time: 23:48:59, 12-09-2007, with Mw of 7.8 and Mentawai, Indonesia: origin time 03:35:26, with Mw of 7.1), the effect of tilt noise (20-60s) and harmonic tremor (0.5-6Hz).



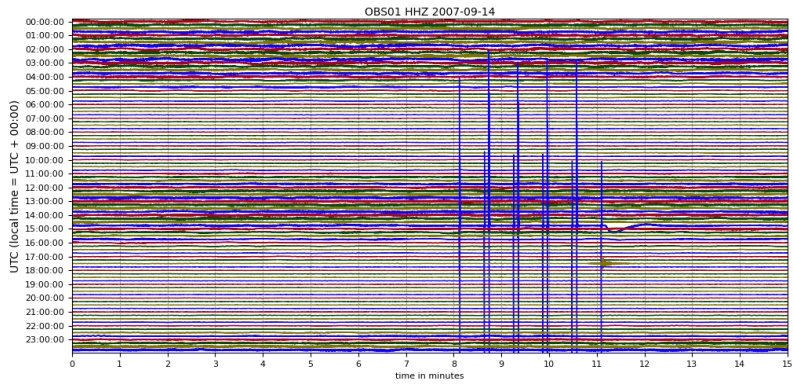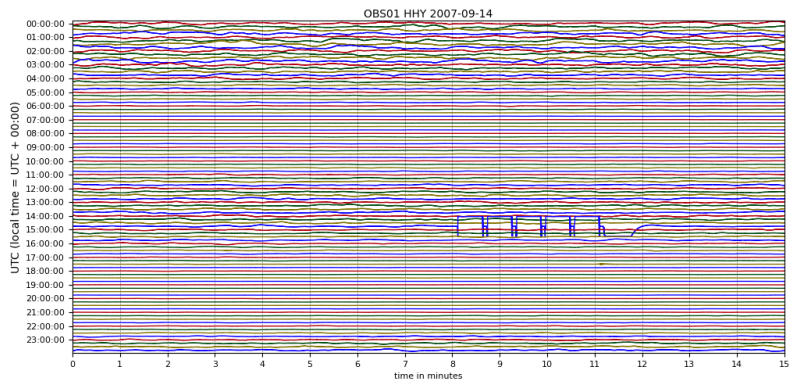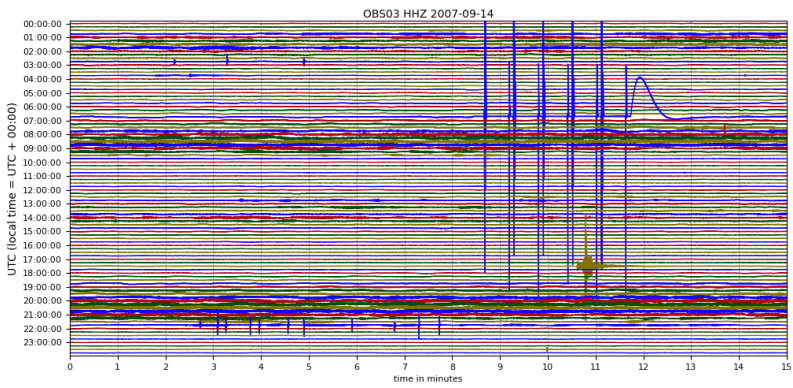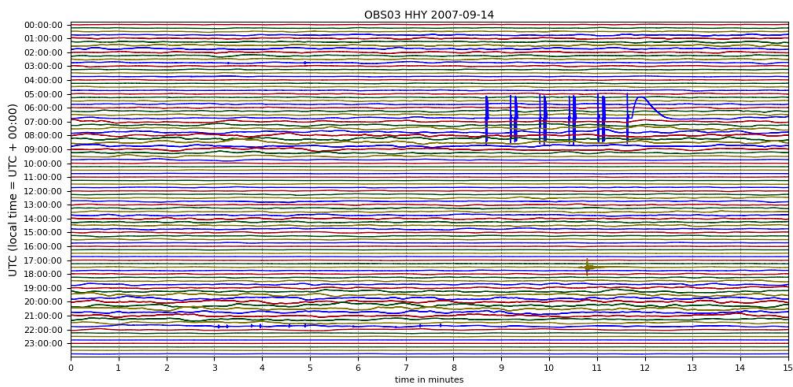

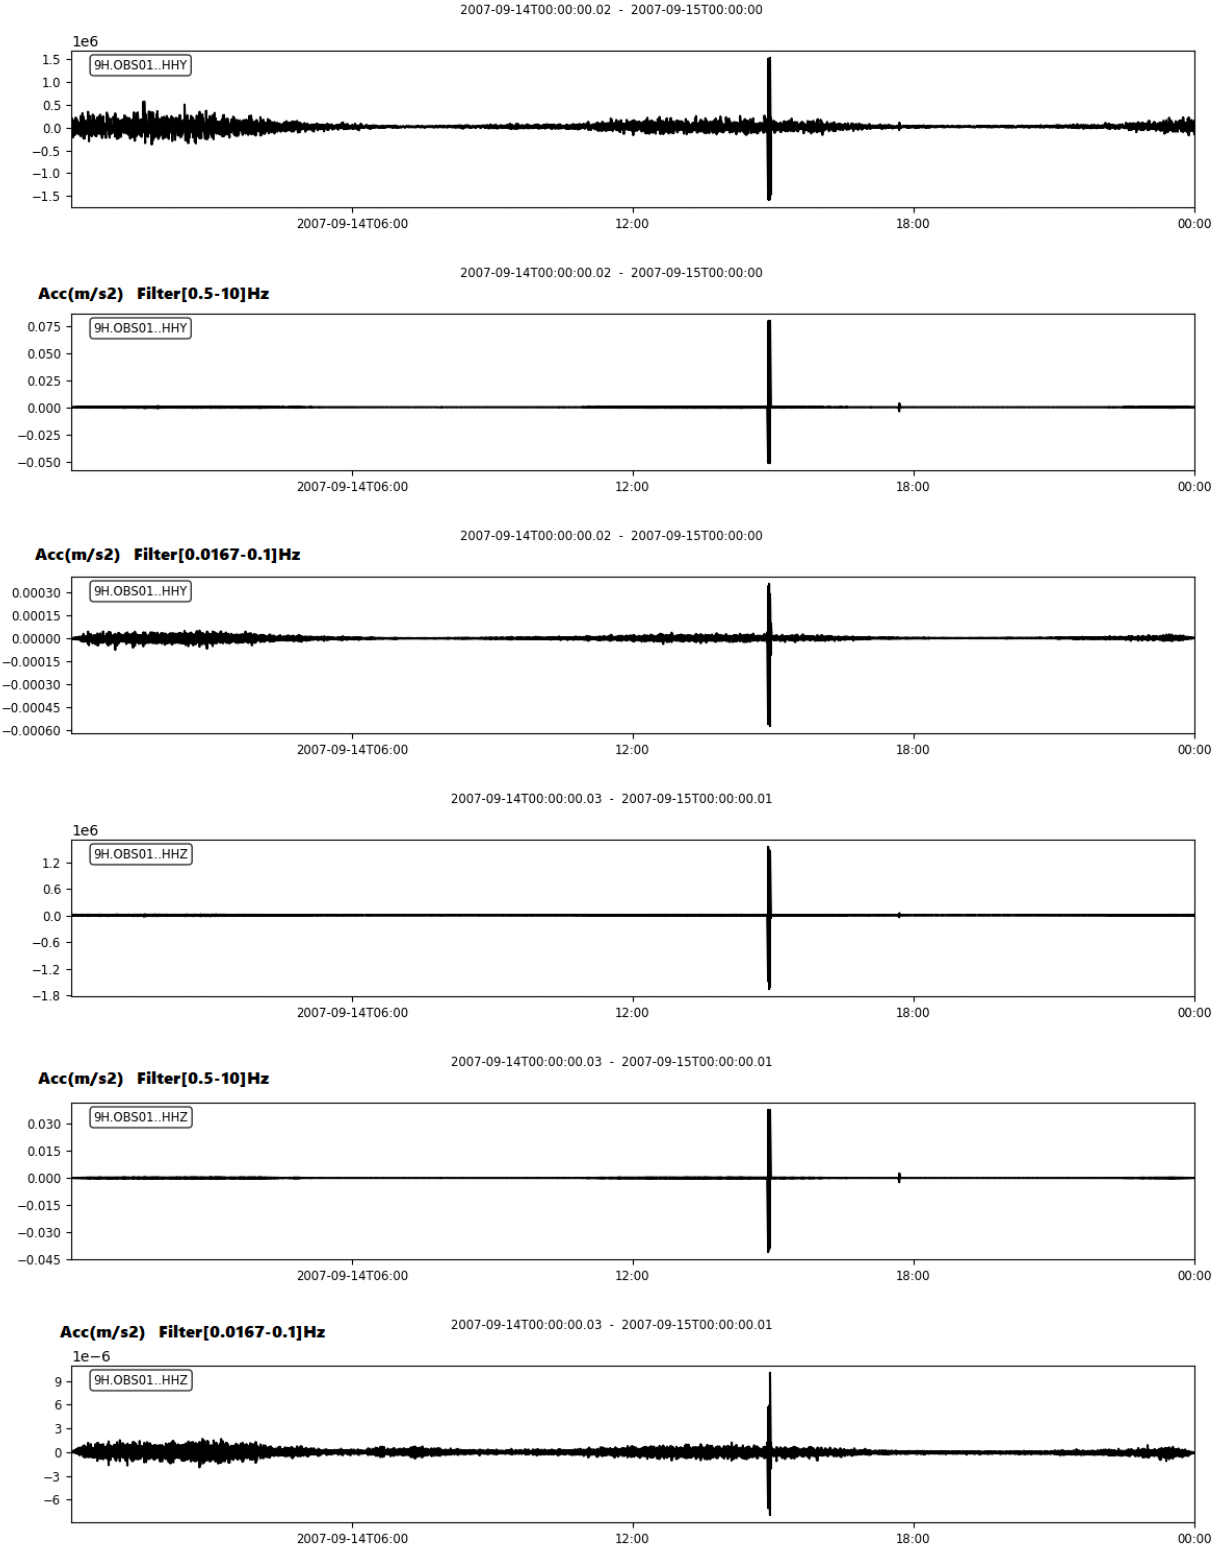

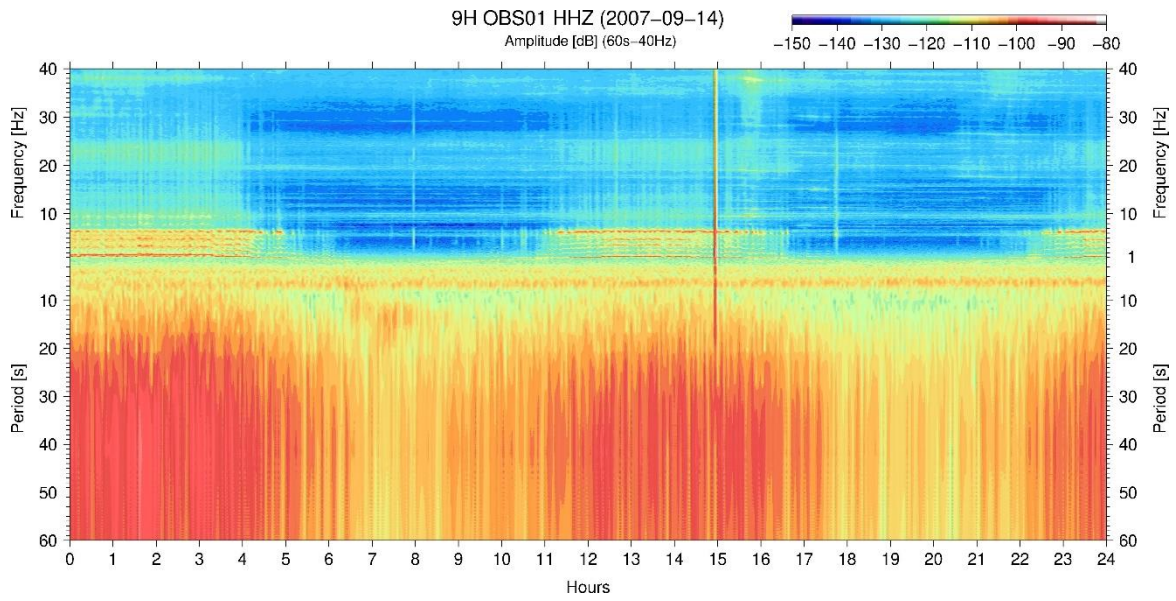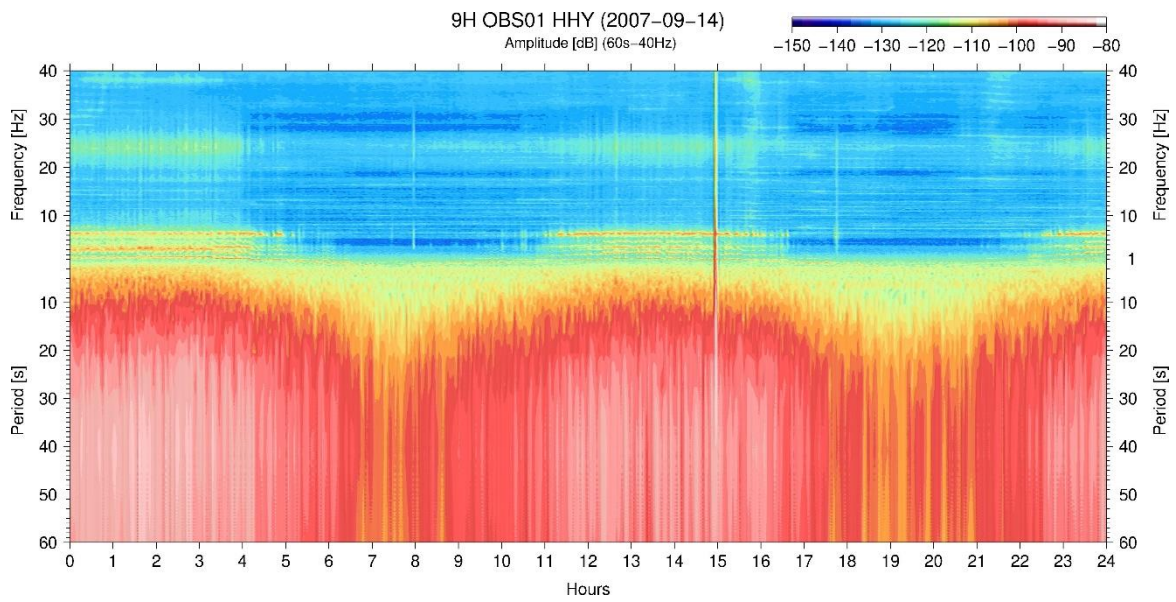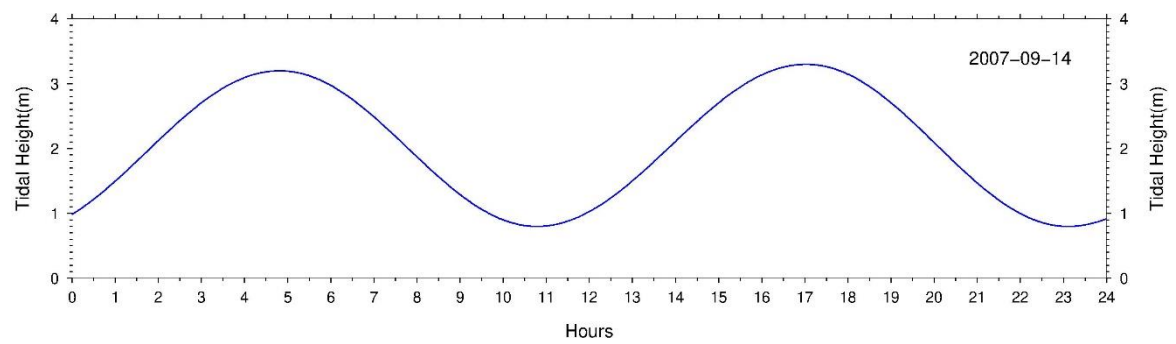

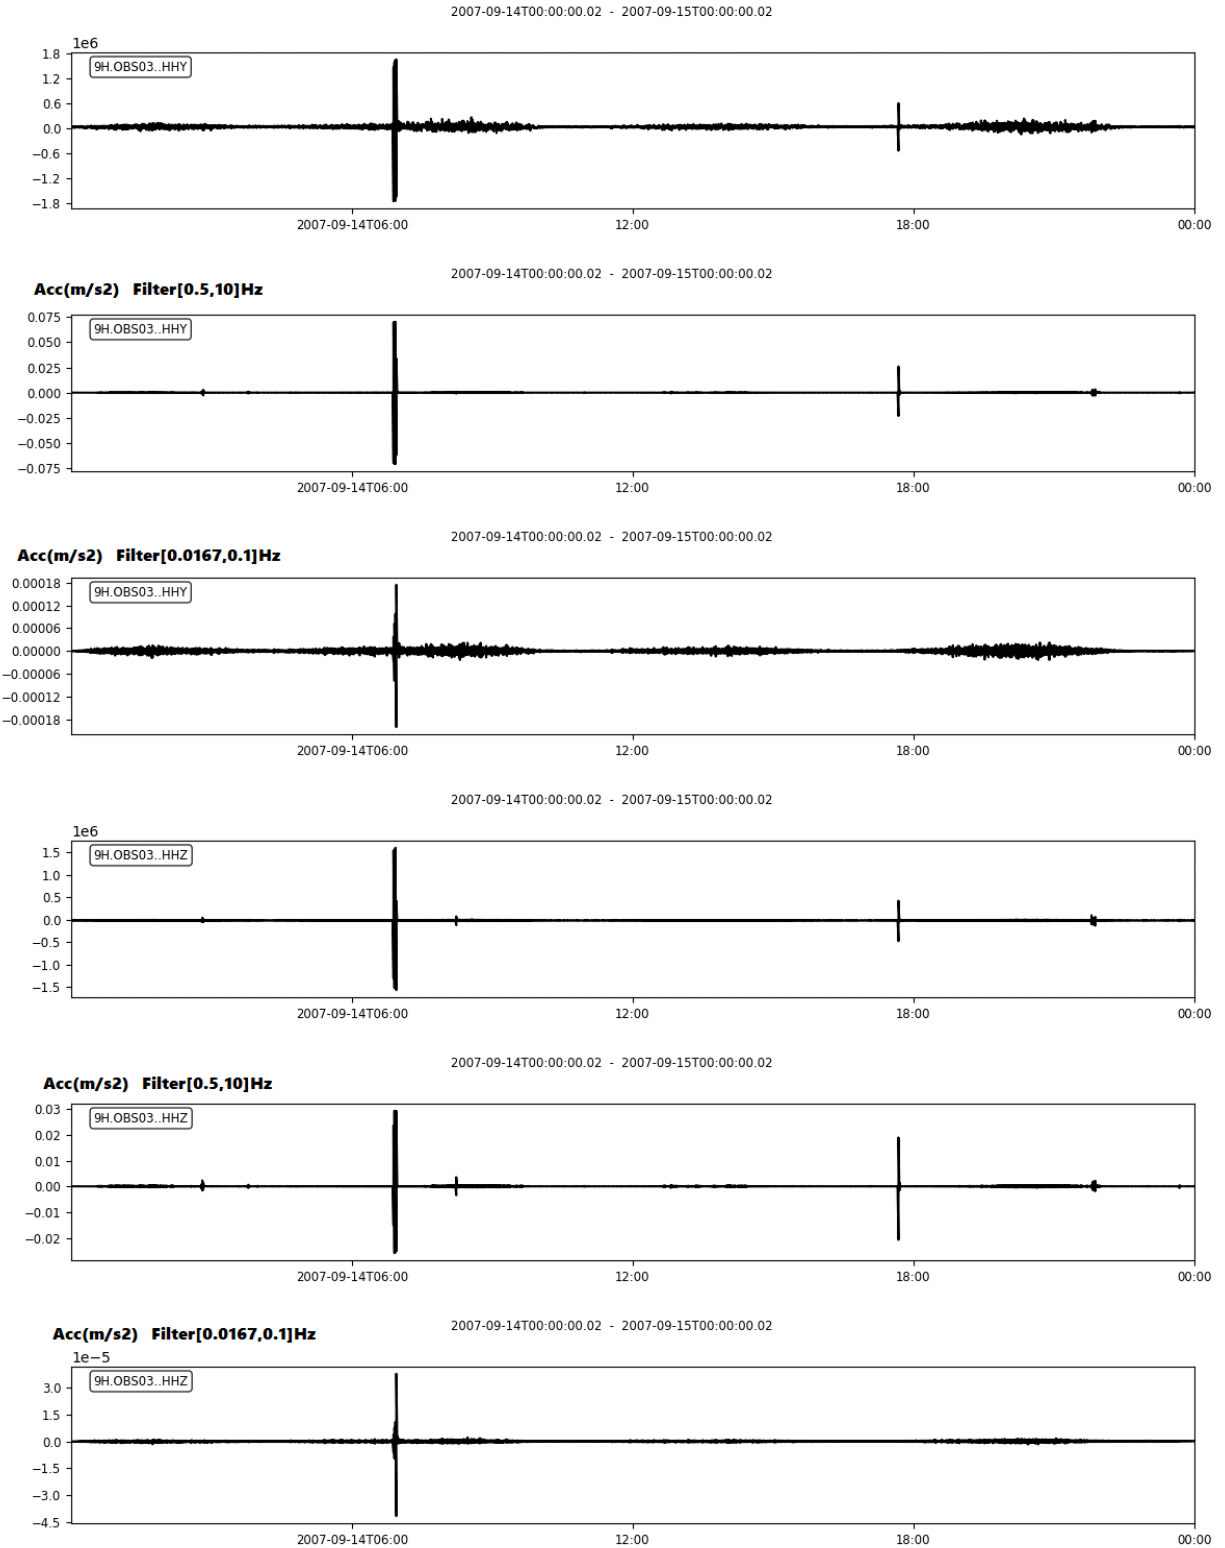

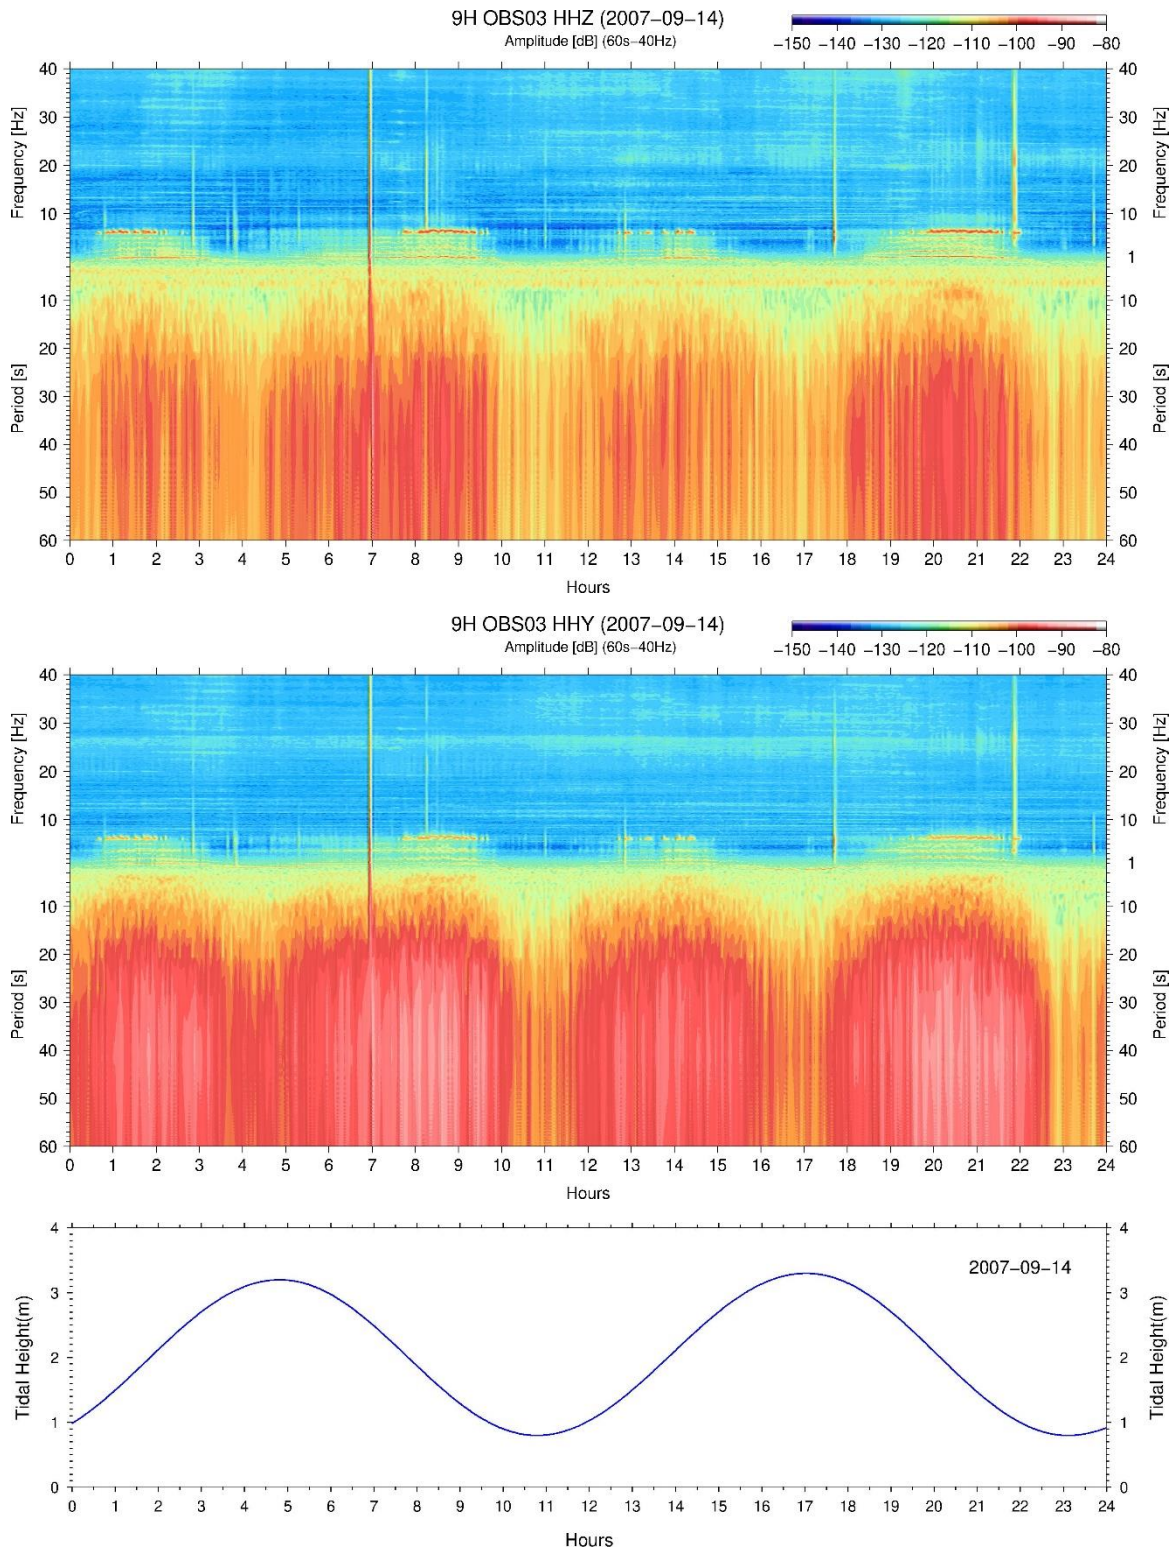

**Figure S5 | OBS01-OBS03 2007-09-14** – Day plot, the raw waveform in counts of the vertical Z and horizontal Y components, signals corrected for instrument response to show acceleration ( $m/s^2$ ) and filtered in the short and long period band, spectrogram and tide height in Sines (maximum tidal range of 2.6m), showing the seismometer gimble levelling around 15h (OBS01) and 7h (OBS03), the effect of tilt noise (20-60s) and harmonic tremor (0.5-6Hz).

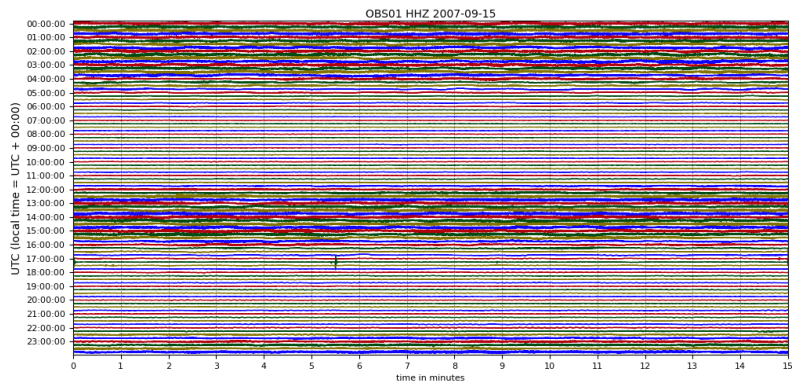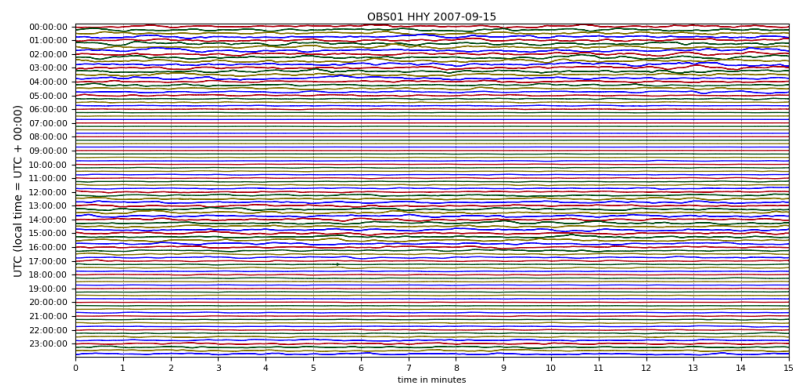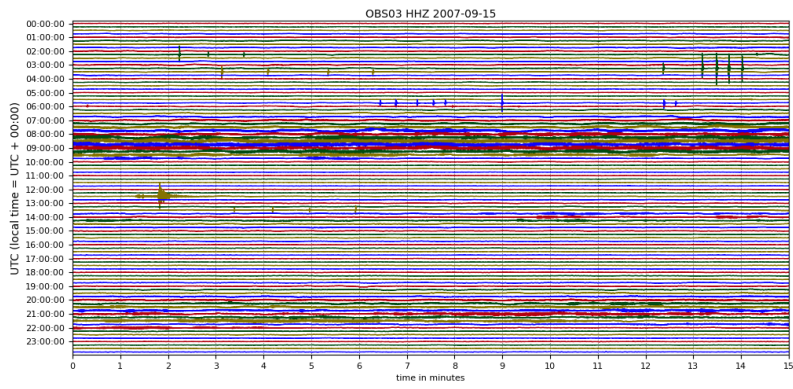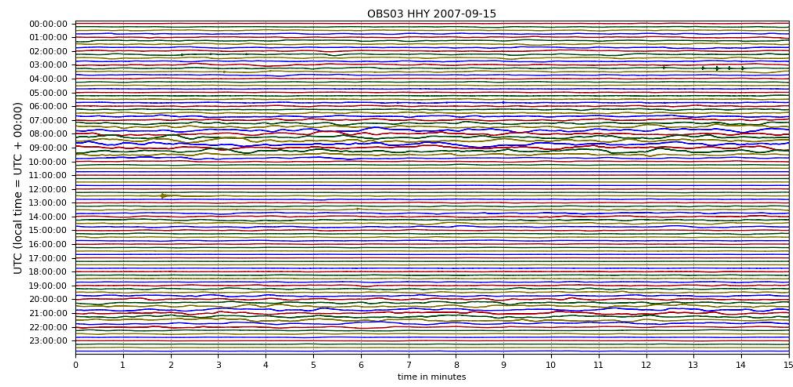

2007-09-15T00:00:00.01 - 2007-09-16T00:00:00

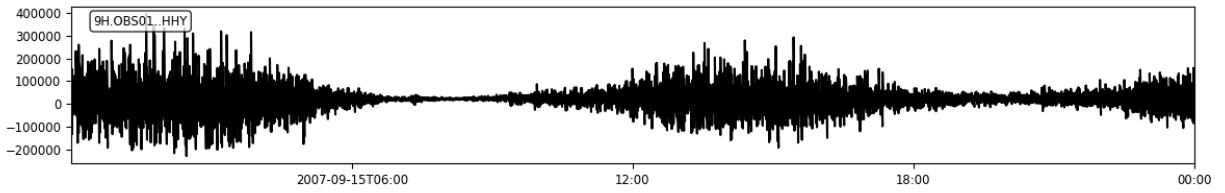

**Acc(m/s<sup>2</sup>) Filter[0.5,10]Hz**

2007-09-15T00:00:00.01 - 2007-09-16T00:00:00

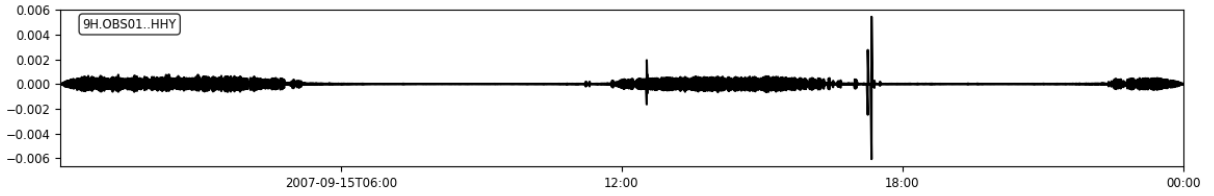

**ACC(m/s<sup>2</sup>) Filter[0.0167,0.1]Hz**

2007-09-15T00:00:00.01 - 2007-09-16T00:00:00

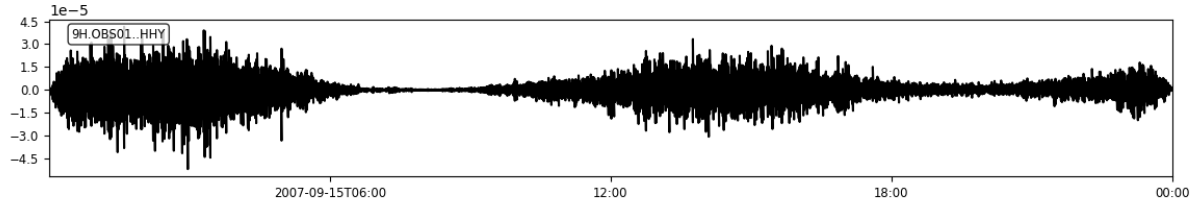

2007-09-15T00:00:00.02 - 2007-09-16T00:00:00.02

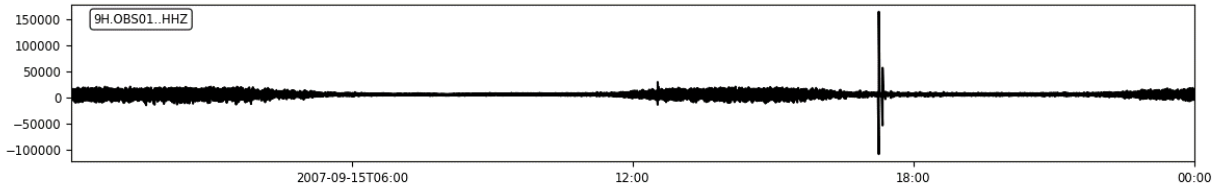

**Acc(m/s<sup>2</sup>) Filter[0.5,10]Hz**

2007-09-15T00:00:00.02 - 2007-09-16T00:00:00.02

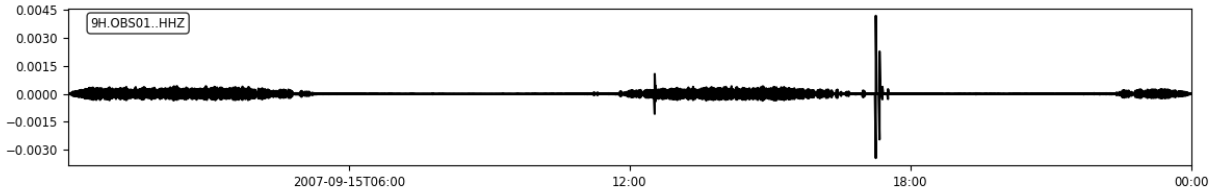

**Acc(m/s<sup>2</sup>) Filter[0.0167,0.1]Hz**

2007-09-15T00:00:00.02 - 2007-09-16T00:00:00.02

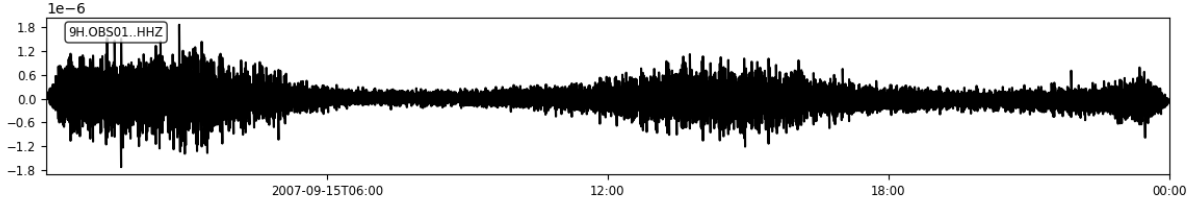

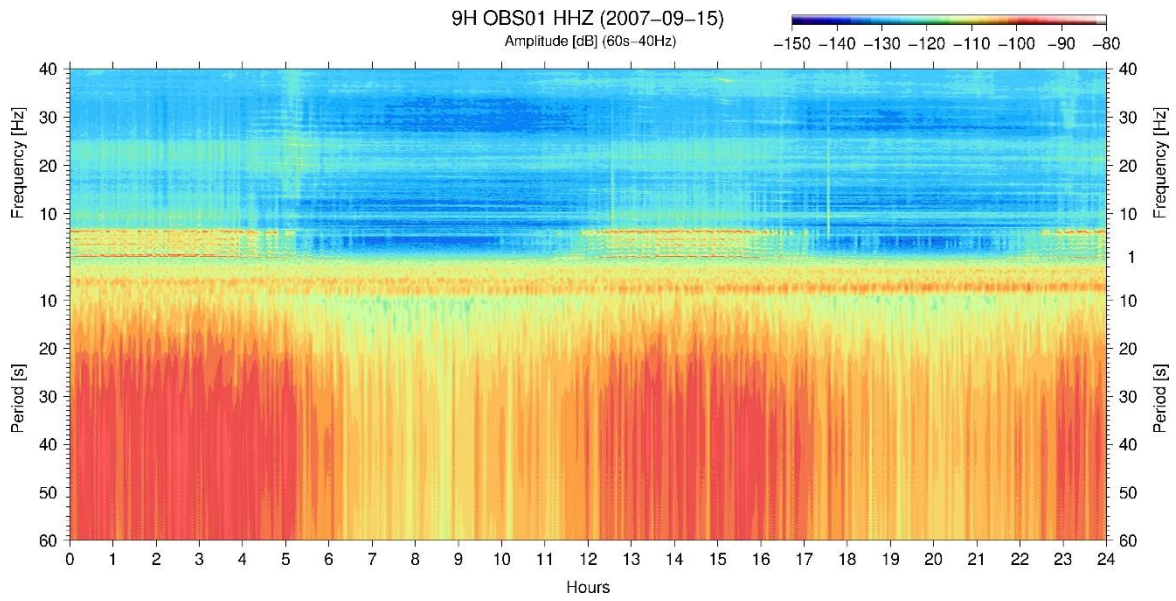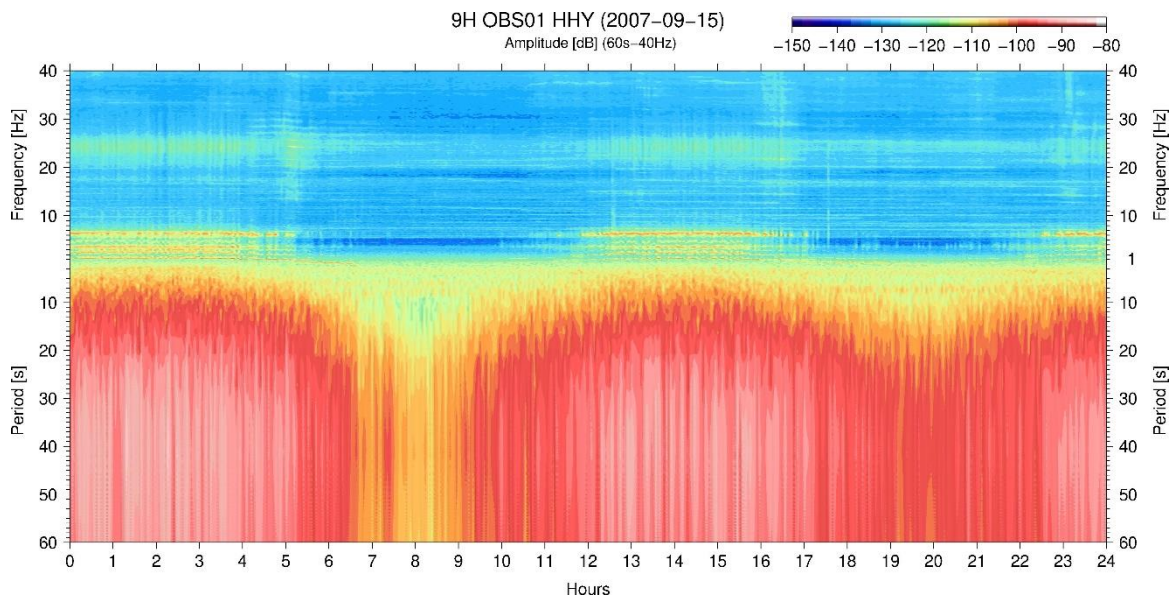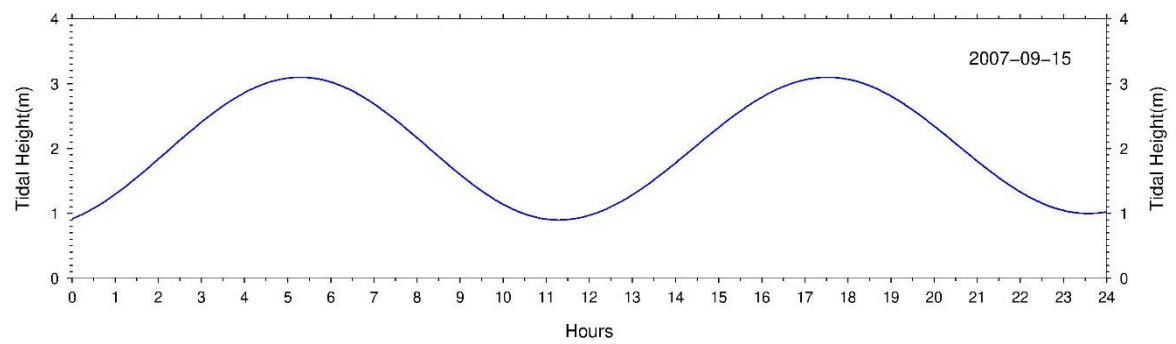



2007-09-15T00:00:00.03 - 2007-09-16T00:00:00.01

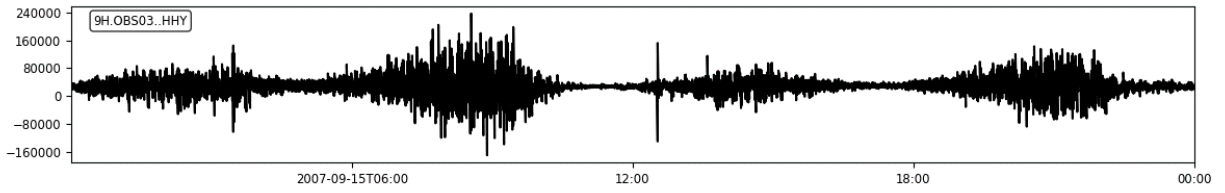

2007-09-15T00:00:00.03 - 2007-09-16T00:00:00.01

**Acc(m/s<sup>2</sup>) Filter[0.5,10]Hz**

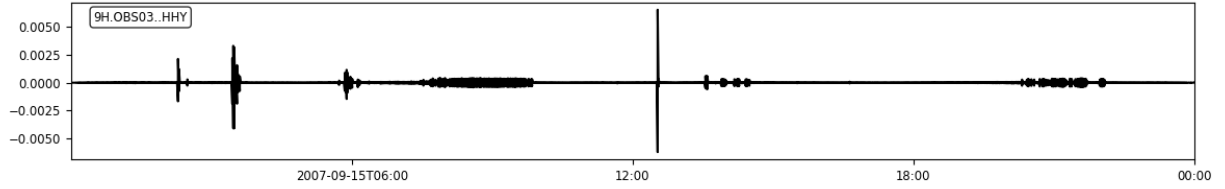

2007-09-15T00:00:00.03 - 2007-09-16T00:00:00.01

**Acc(m/s<sup>2</sup>) Filter[0.0167,0.1]Hz**

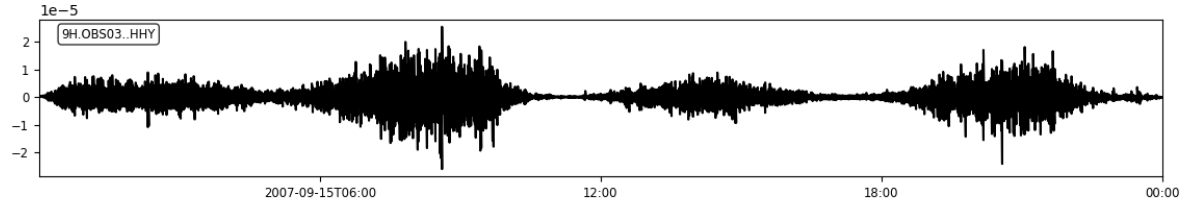

2007-09-15T00:00:00.03 - 2007-09-16T00:00:00.00

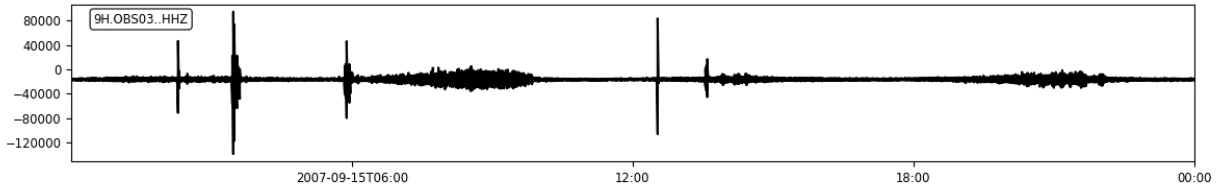

2007-09-15T00:00:00.03 - 2007-09-16T00:00:00.00

**Acc(m/s<sup>2</sup>) Filter[0.5,10]Hz**

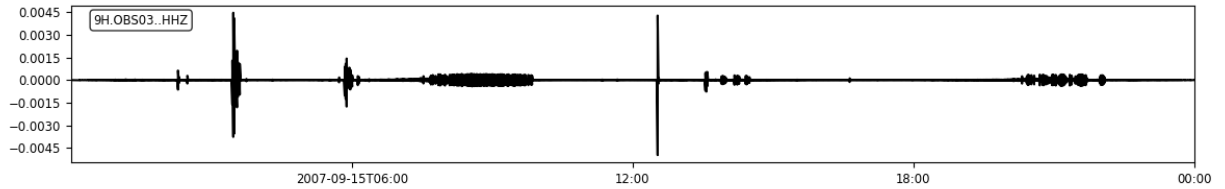

2007-09-15T00:00:00.03 - 2007-09-16T00:00:00.00

**Acc(m/s<sup>2</sup>) Filter[0.0167,0.1]Hz**

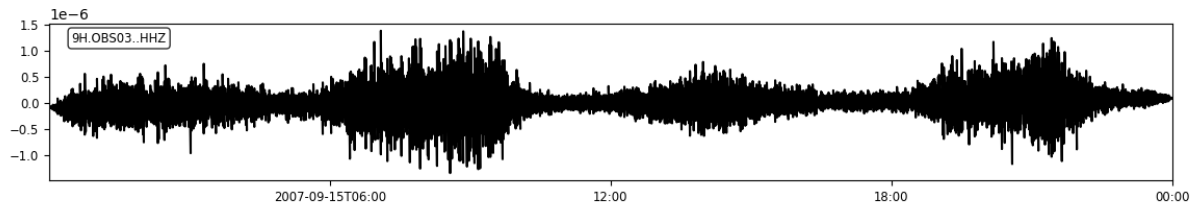

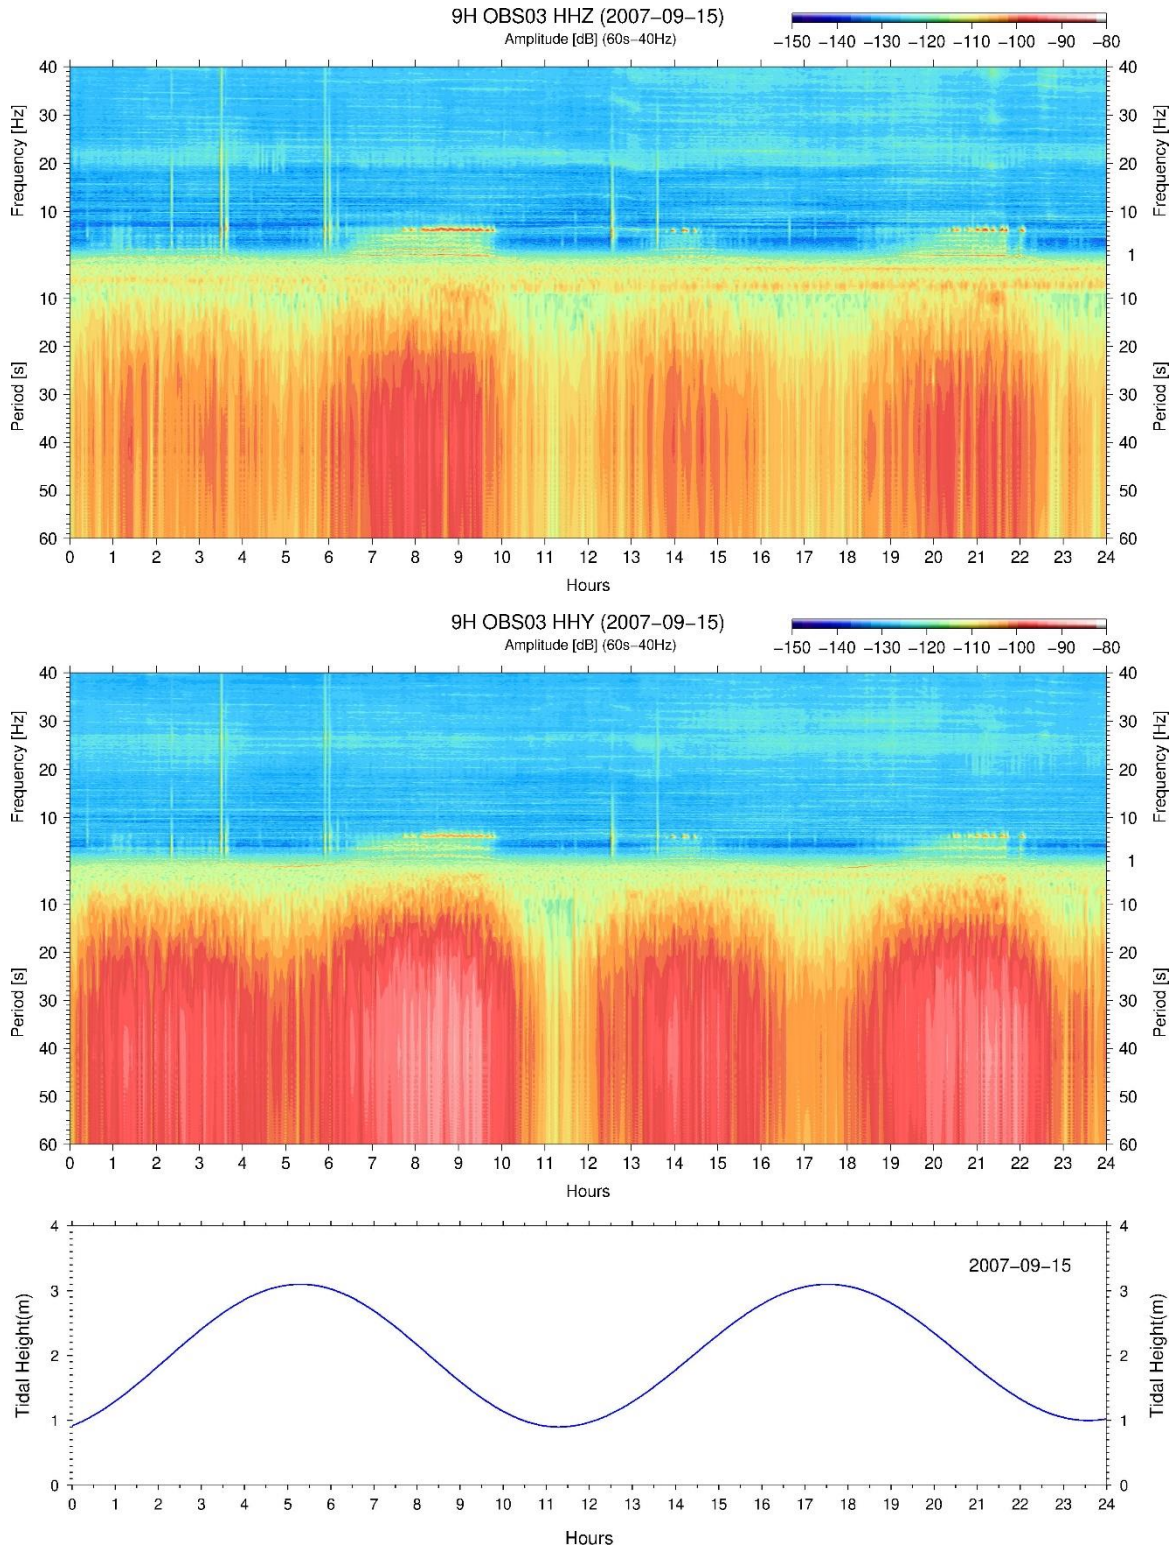

**Figure S6 | OBS01-OBS03 2007-09-15** – Day plot, the raw waveform in counts of the vertical Z and horizontal Y components, signals corrected for instrument response to show acceleration ( $m/s^2$ ) and filtered in the short and long period band, spectrogram and tidal height in Sines (maximum tidal range of 2.4m), showing the effect of tilt noise (20-60s) and harmonic tremor (0.5-6Hz), short duration events and a local earthquake.

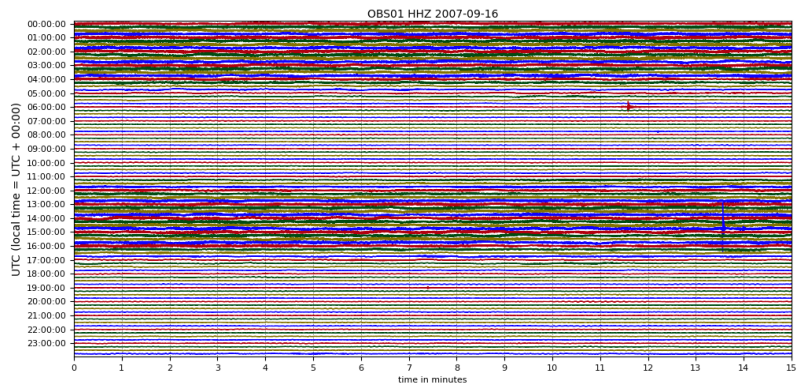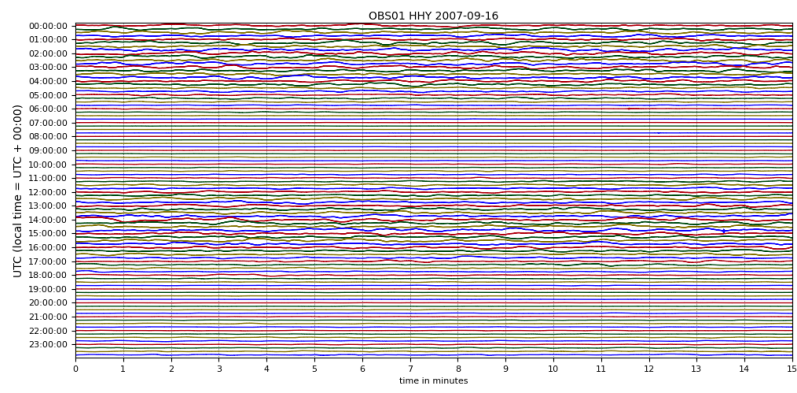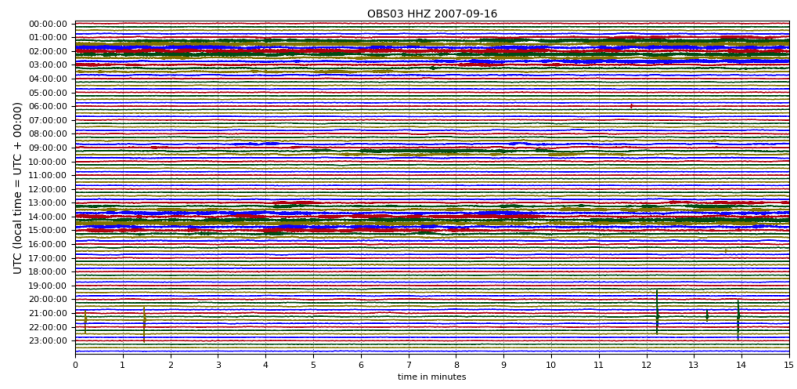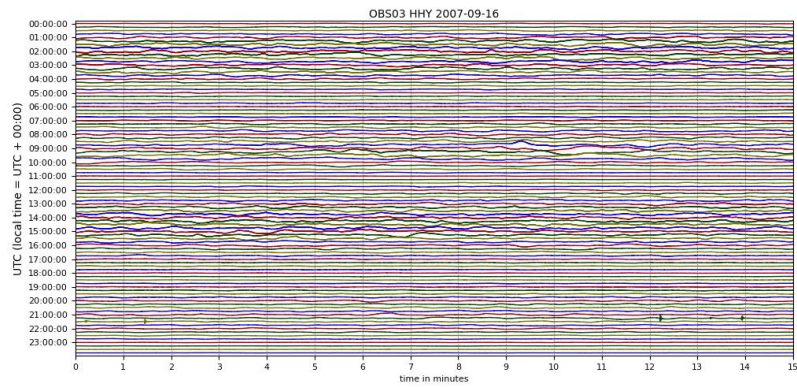

2007-09-16T00:00:00.01 - 2007-09-17T00:00:00.01

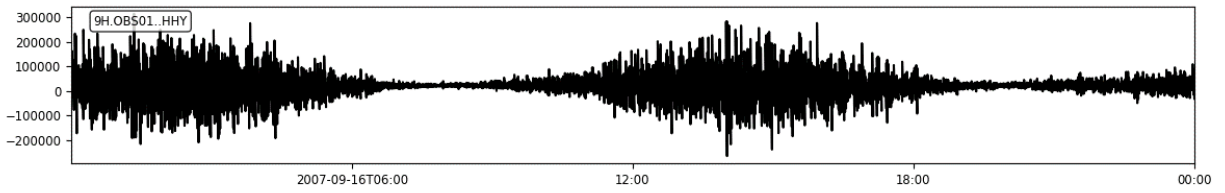

2007-09-16T00:00:00.01 - 2007-09-17T00:00:00.01

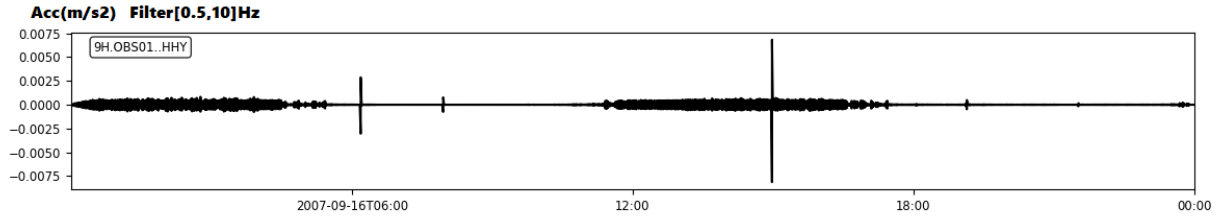

2007-09-16T00:00:00.01 - 2007-09-17T00:00:00.01

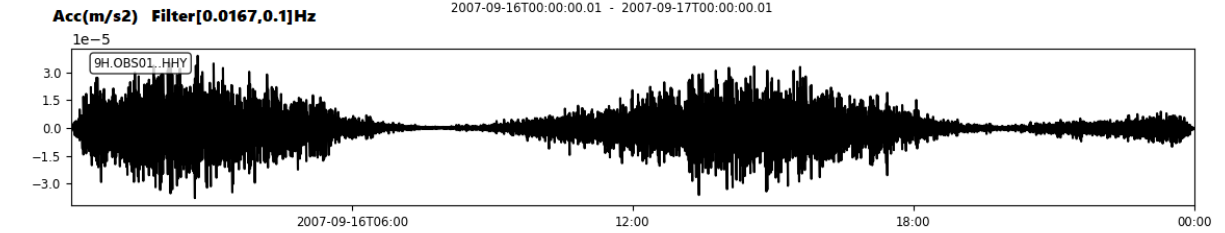

2007-09-16T00:00:00.03 - 2007-09-17T00:00:00.02

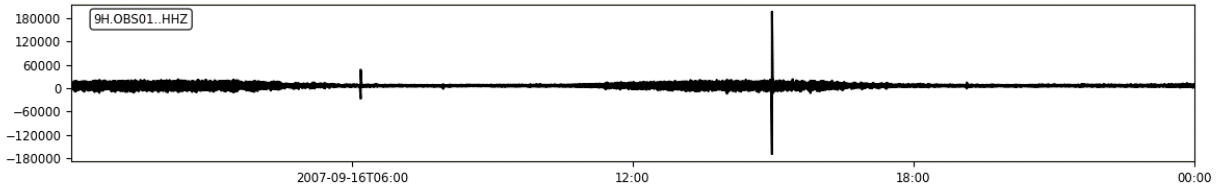

2007-09-16T00:00:00.03 - 2007-09-17T00:00:00.02

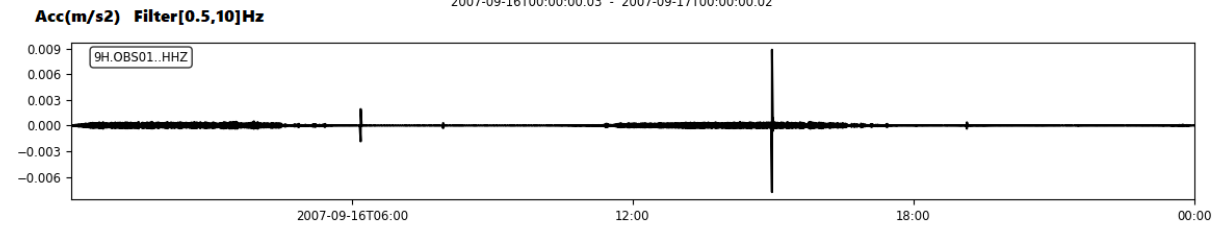

2007-09-16T00:00:00.03 - 2007-09-17T00:00:00.02

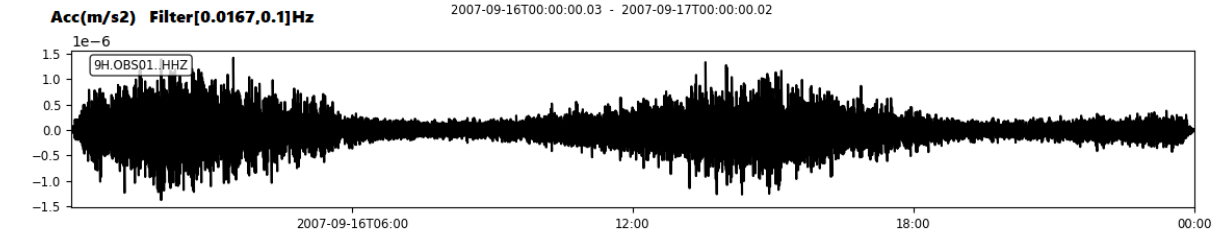

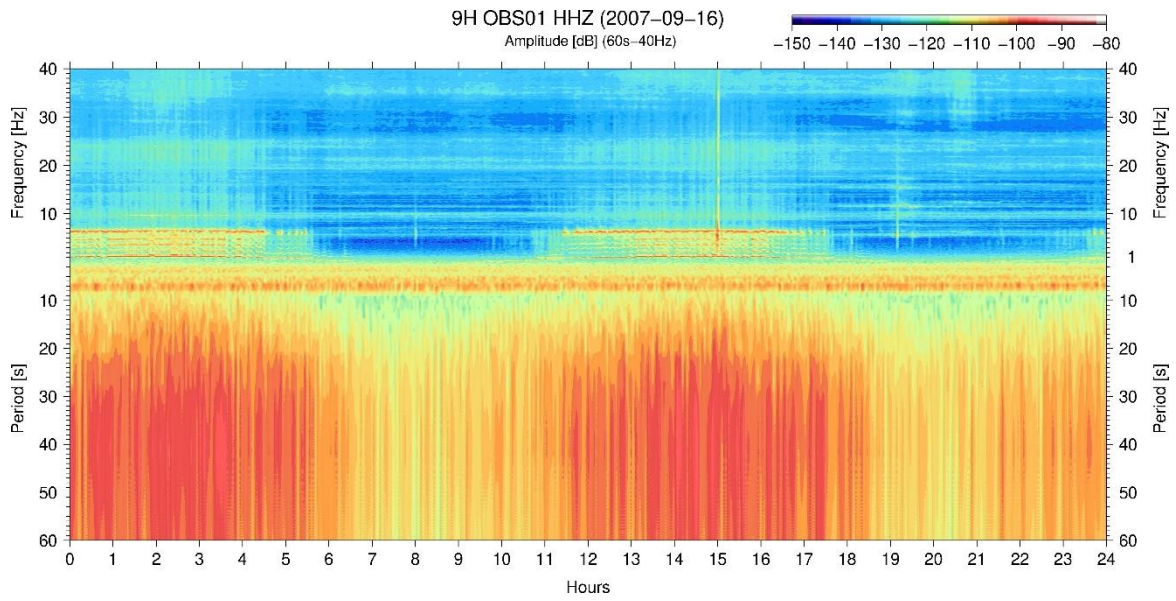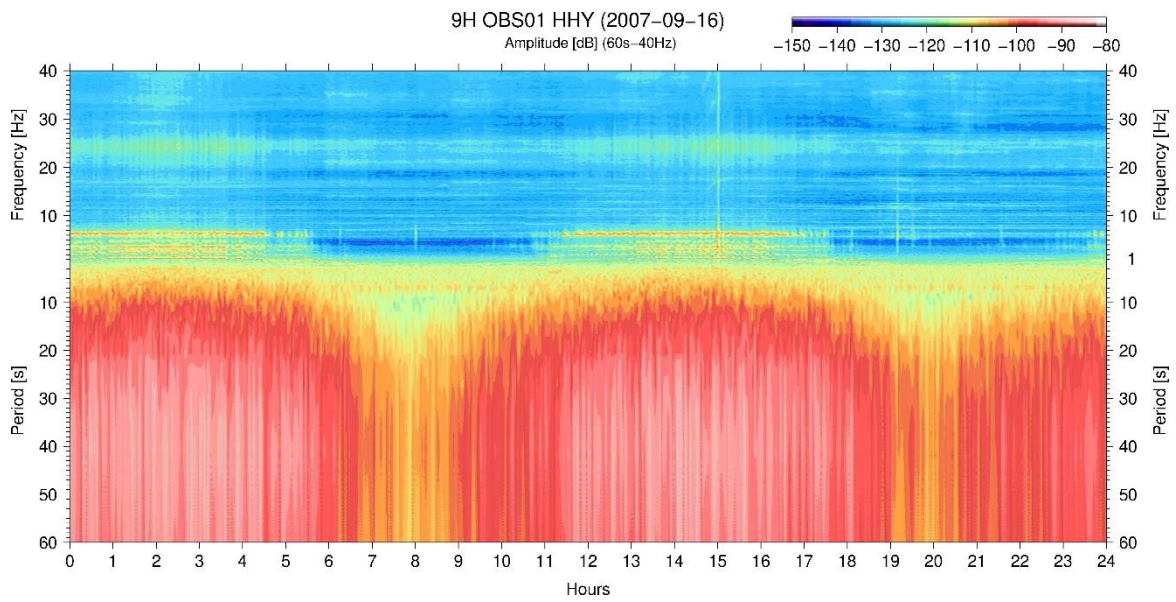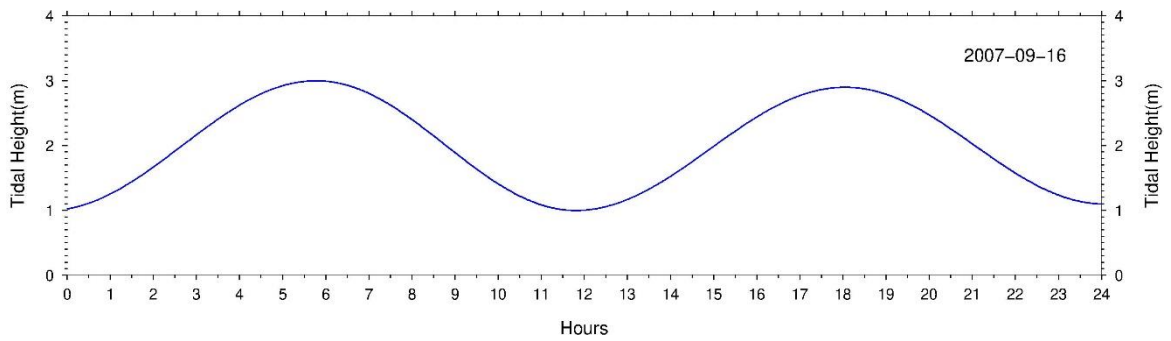

2007-09-16T00:00:00.02 - 2007-09-17T00:00:00.02

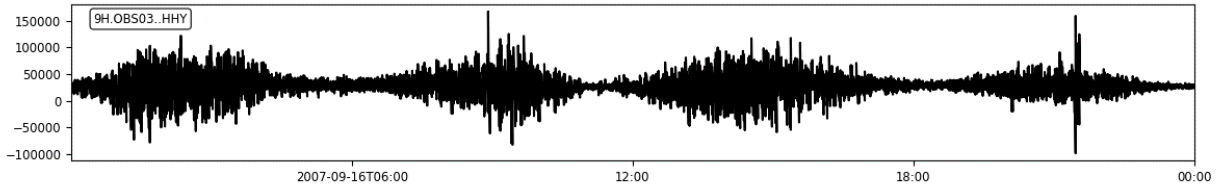

2007-09-16T00:00:00.02 - 2007-09-17T00:00:00.02

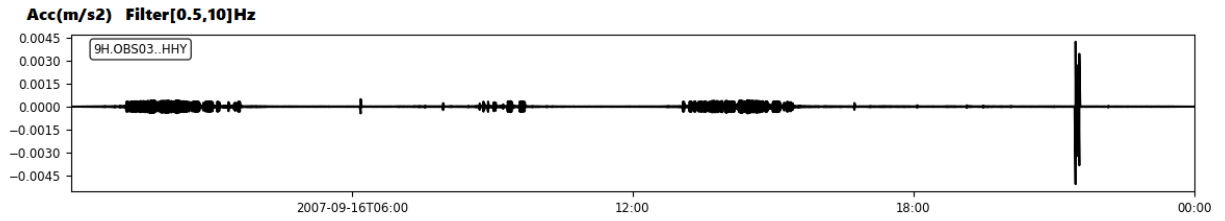

2007-09-16T00:00:00.02 - 2007-09-17T00:00:00.02

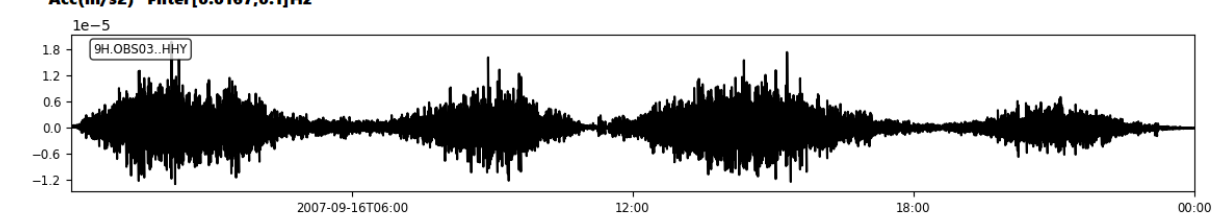

2007-09-16T00:00:00.01 - 2007-09-17T00:00:00.02

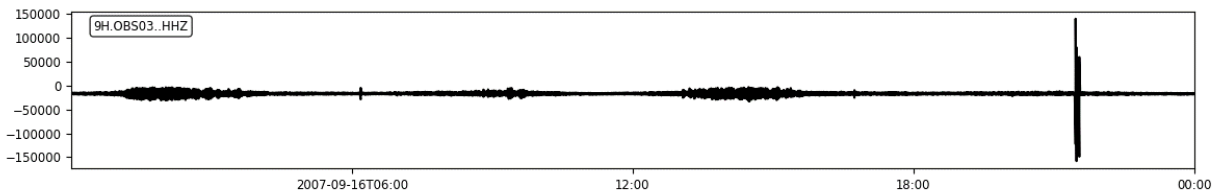

2007-09-16T00:00:00.01 - 2007-09-17T00:00:00.02

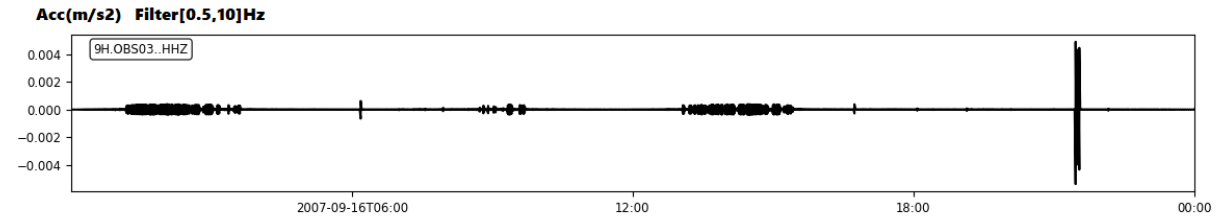

2007-09-16T00:00:00.01 - 2007-09-17T00:00:00.02

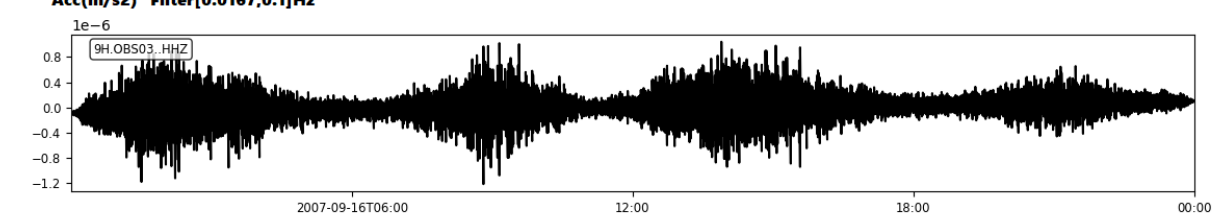

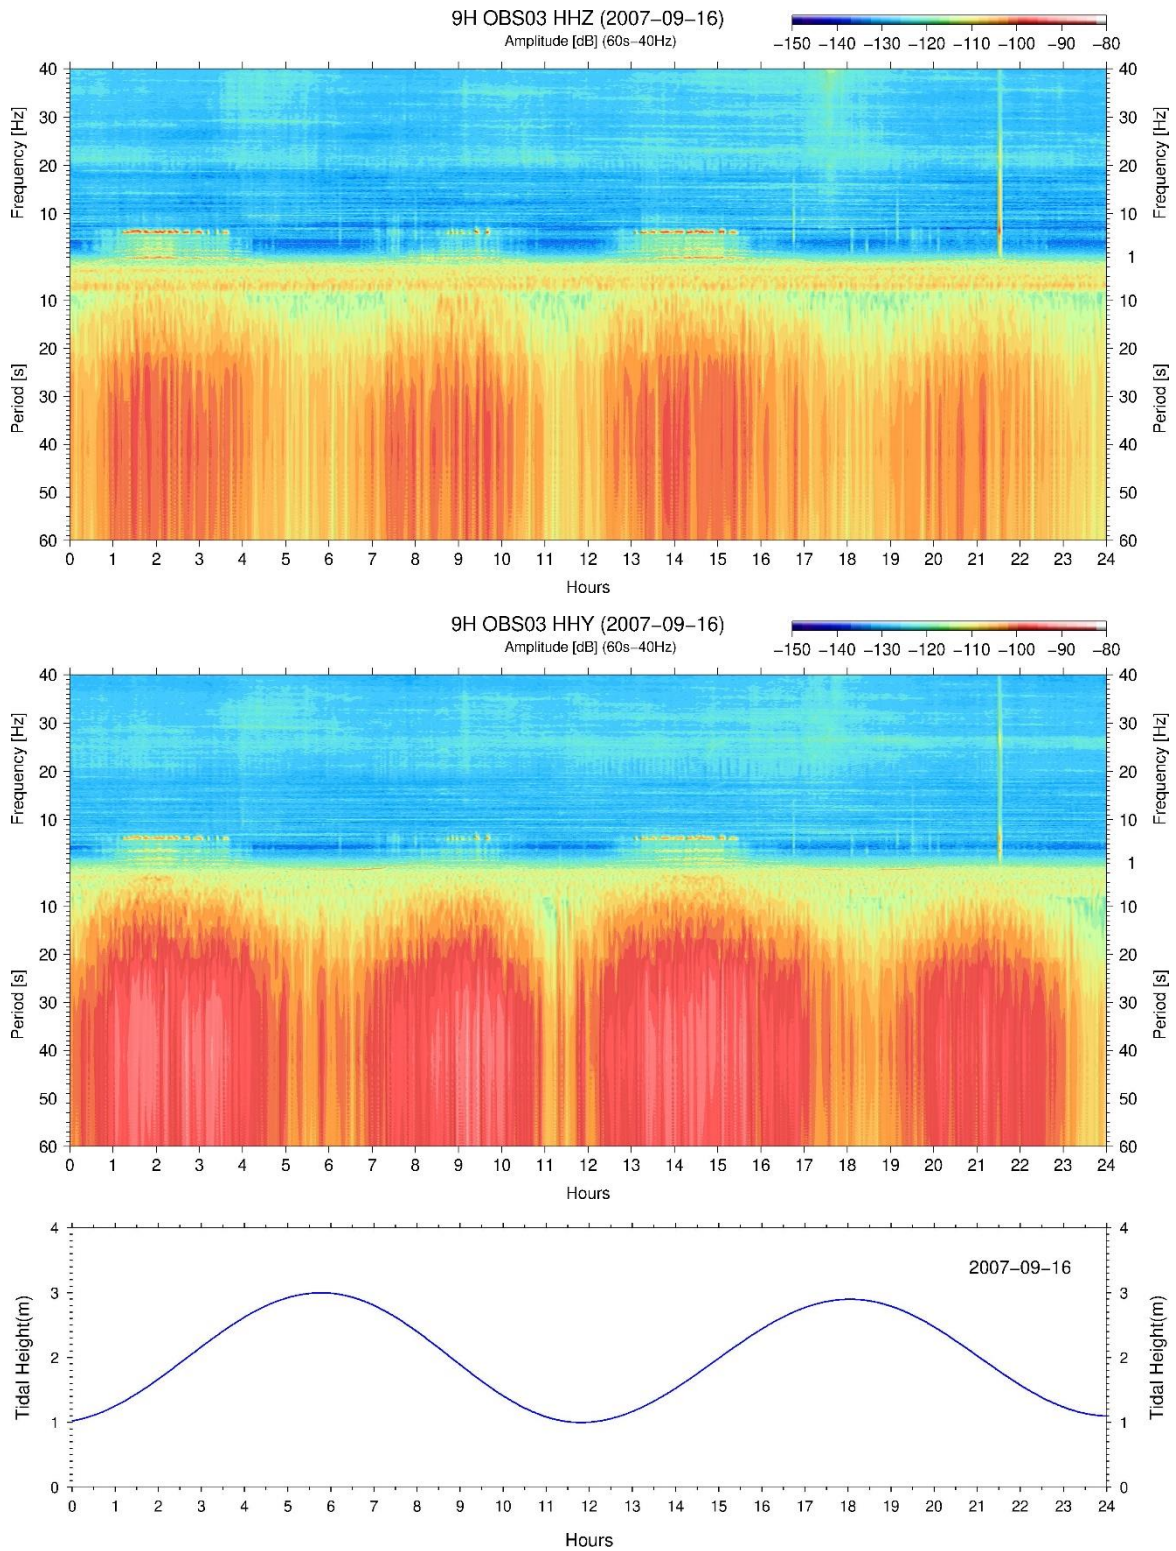

**Figure S7 | OBS01-OBS03 2007-09-16** – Day plot, the raw waveform in counts of the vertical Z and horizontal Y components, signals corrected for instrument response to show acceleration ( $m/s^2$ ) and filtered in the short and long period band, spectrogram and tidal height of Sines (maximum tidal range of 2.1m), showing the effect of tilt noise (20-60s), harmonic tremor (0.5-6Hz) and short duration events.

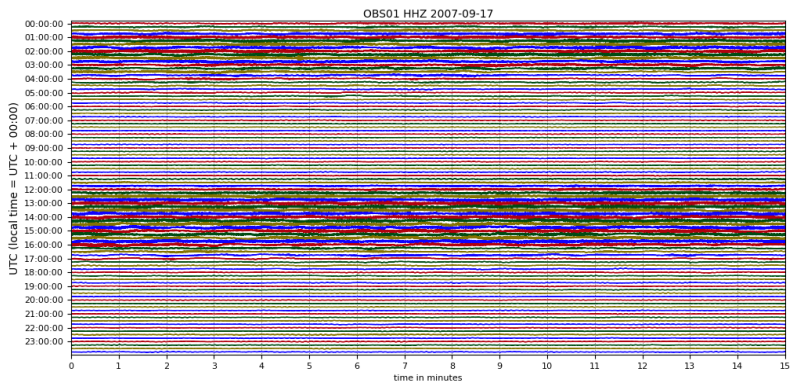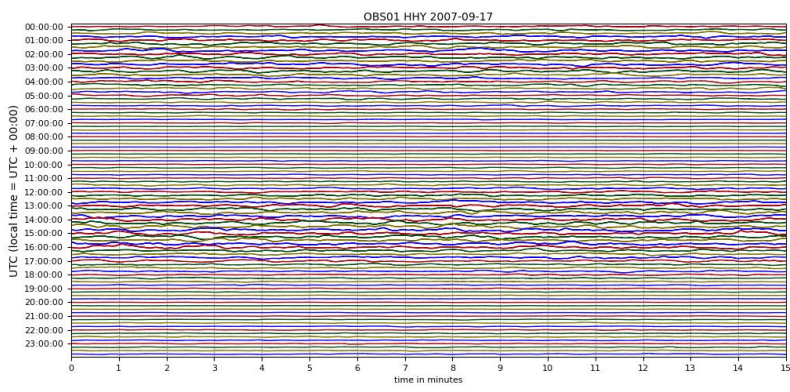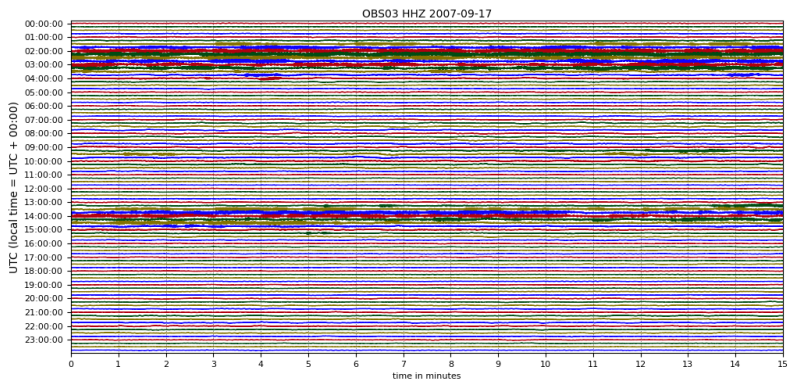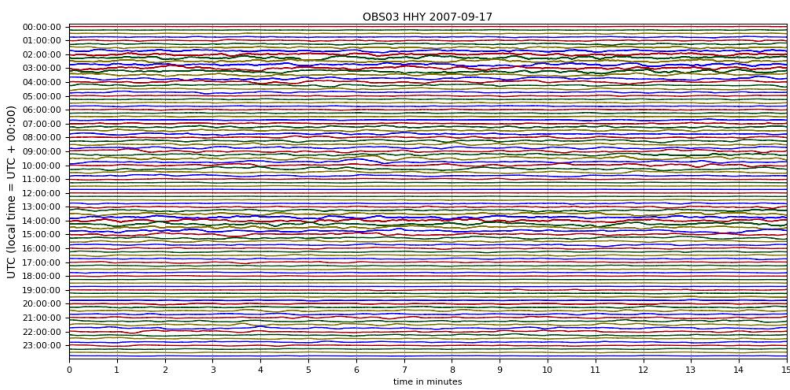



2007-09-17T00:00:00.02 - 2007-09-18T00:00:00.01

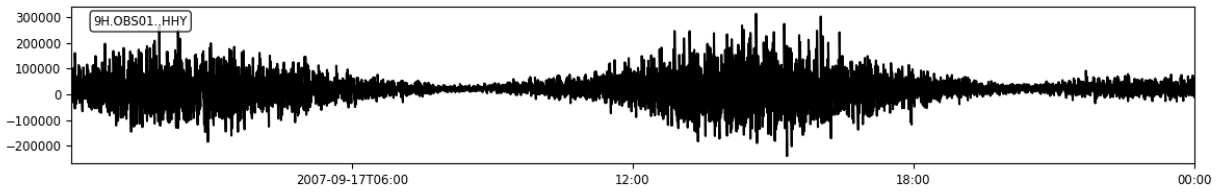

2007-09-17T00:00:00.02 - 2007-09-18T00:00:00.01

**Acc(m/s<sup>2</sup>) Filter[0.5,10]Hz**

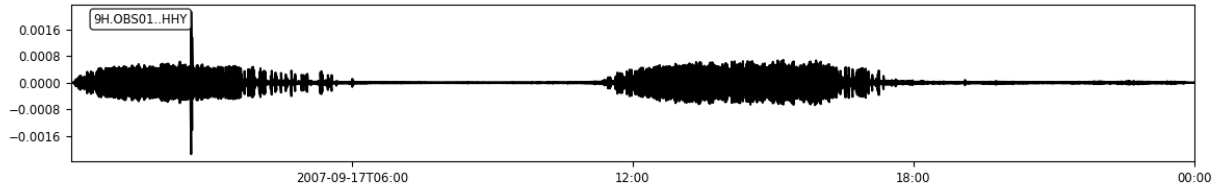

2007-09-17T00:00:00.02 - 2007-09-18T00:00:00.01

**Acc(m/s<sup>2</sup>) Filter[0.0167,0.1]Hz**

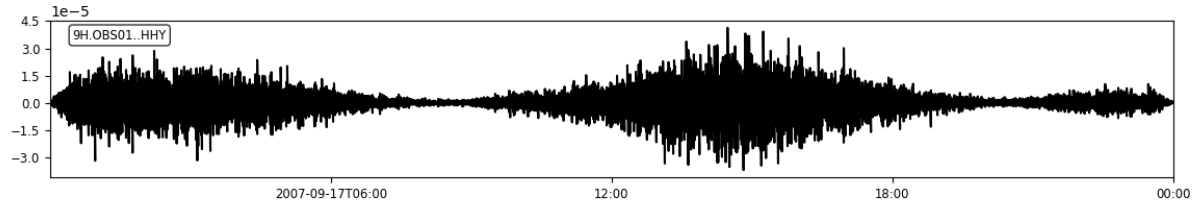

2007-09-17T00:00:00.03 - 2007-09-18T00:00:00.02

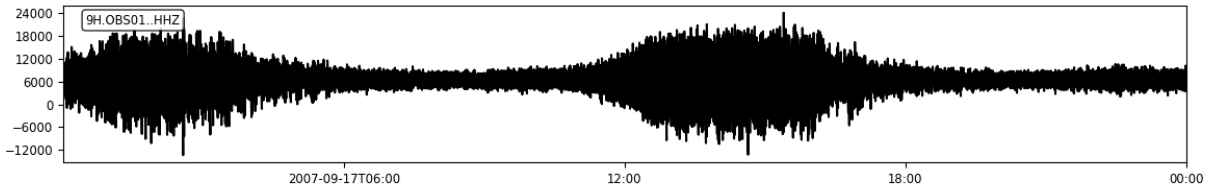

2007-09-17T00:00:00.03 - 2007-09-18T00:00:00.02

**Acc(m/s<sup>2</sup>) Filter[0.5,10]Hz**

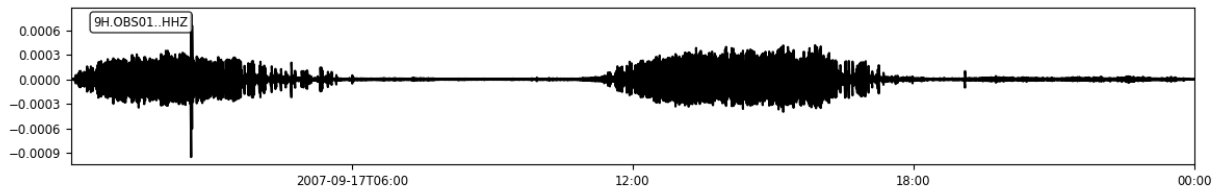

2007-09-17T00:00:00.03 - 2007-09-18T00:00:00.02

**Acc(m/s<sup>2</sup>) Filter[0.0167,0.1]Hz**

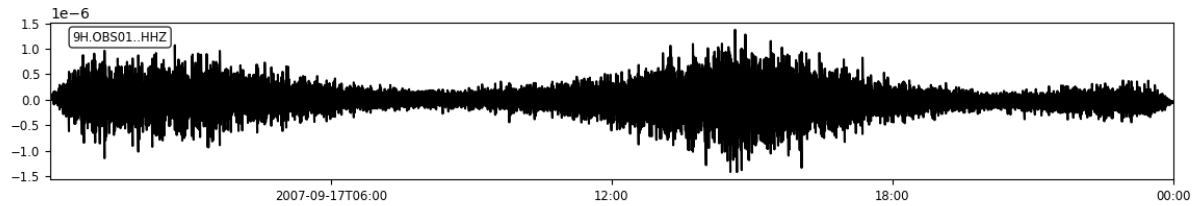

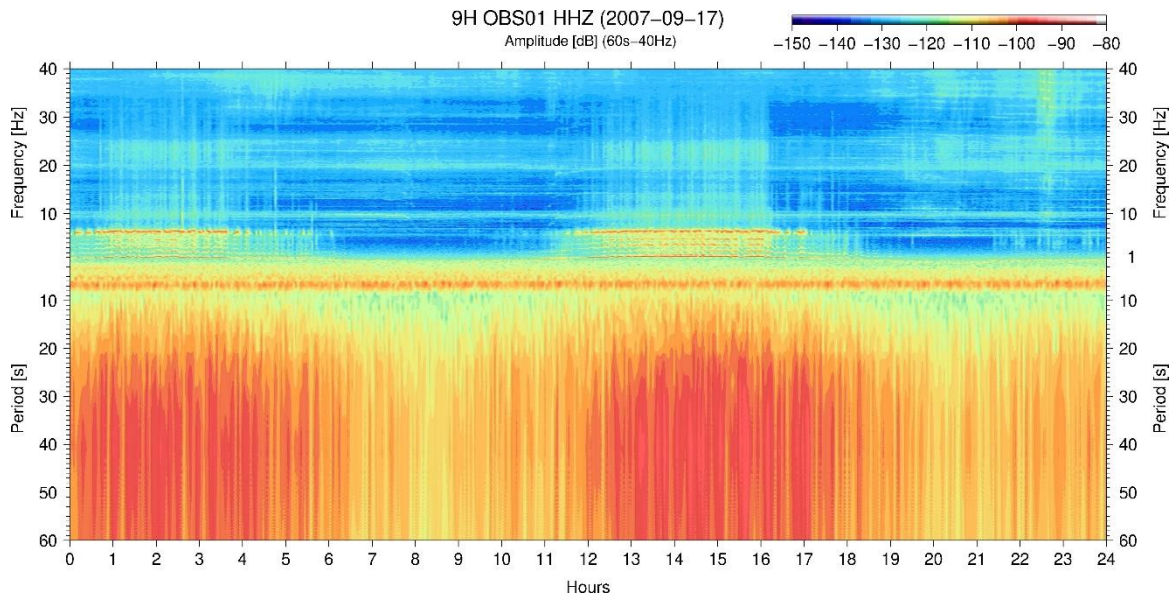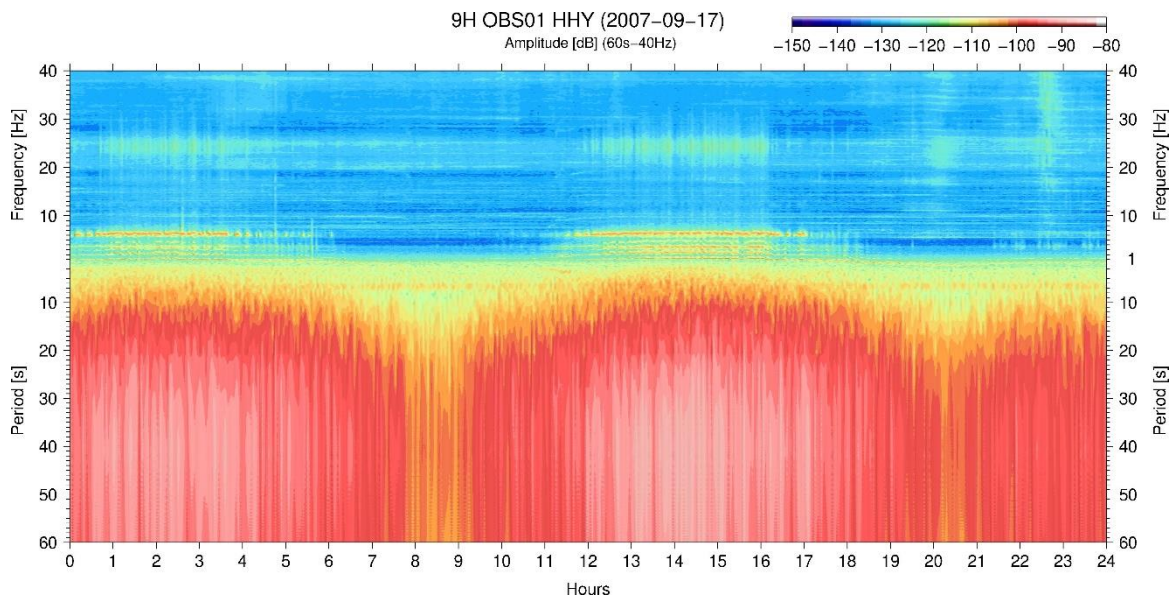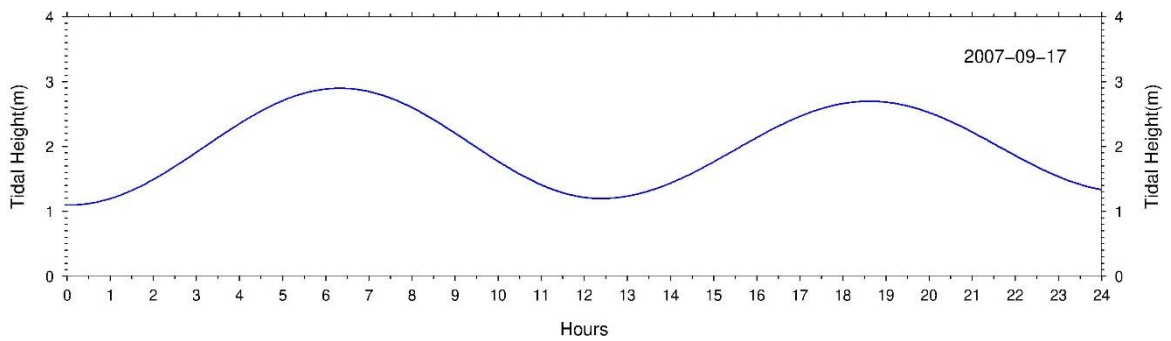

2007-09-17T00:00:00.03 - 2007-09-18T00:00:00.02

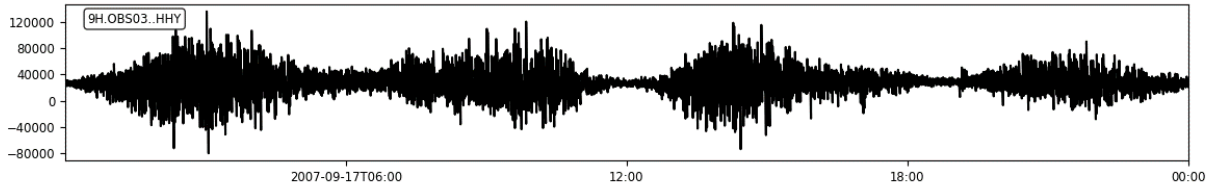

2007-09-17T00:00:00.03 - 2007-09-18T00:00:00.02

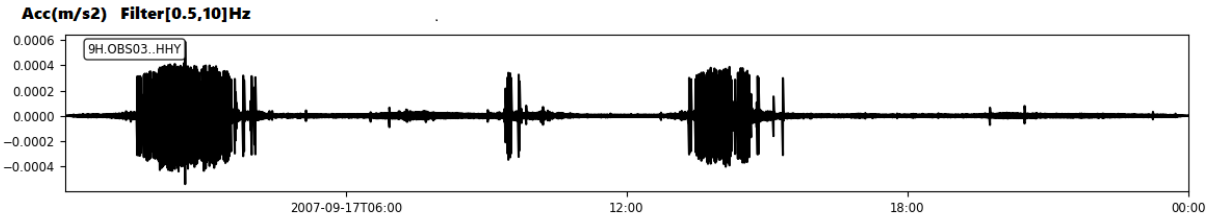

2007-09-17T00:00:00.03 - 2007-09-18T00:00:00.02

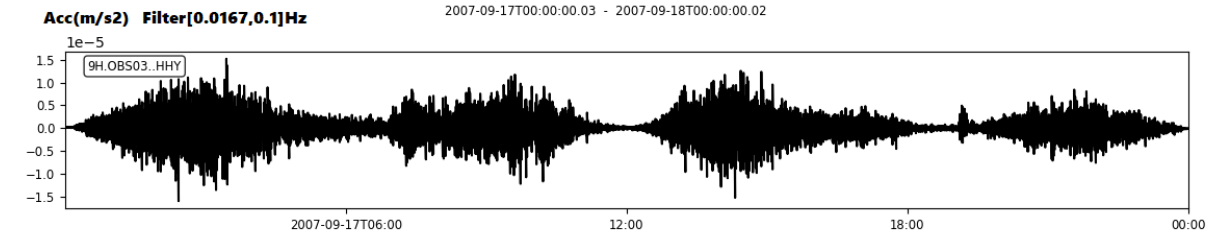

2007-09-17T00:00:00.03 - 2007-09-18T00:00:00.00

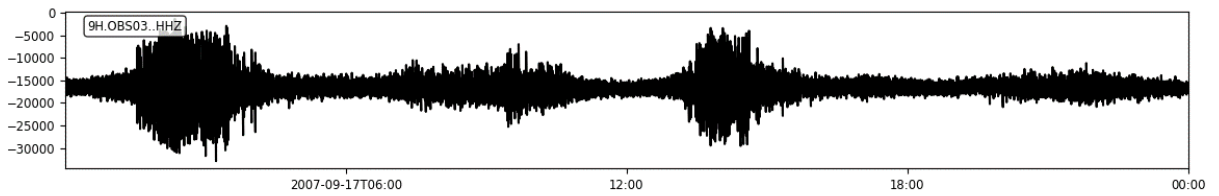

2007-09-17T00:00:00.03 - 2007-09-18T00:00:00.00

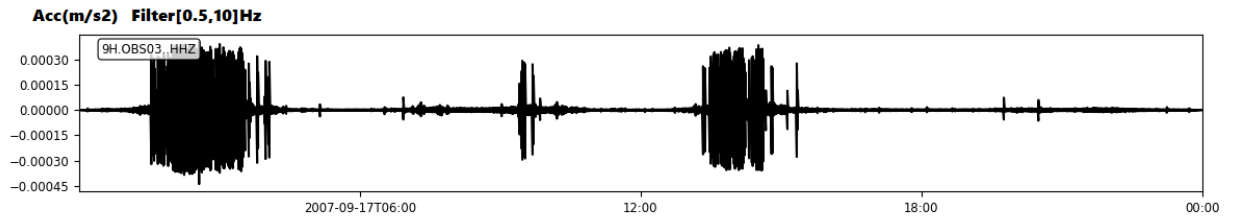

2007-09-17T00:00:00.03 - 2007-09-18T00:00:00.00

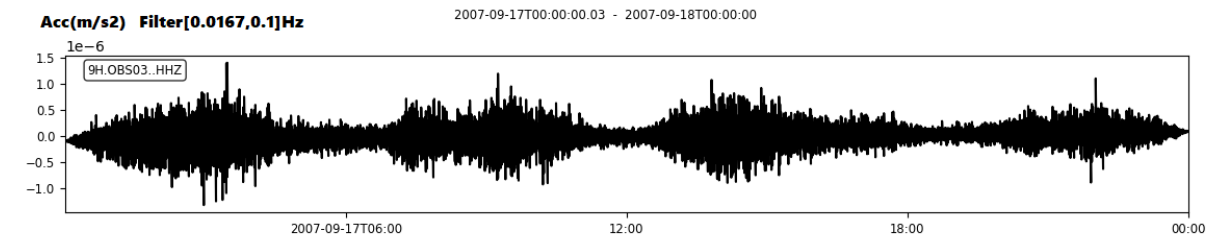

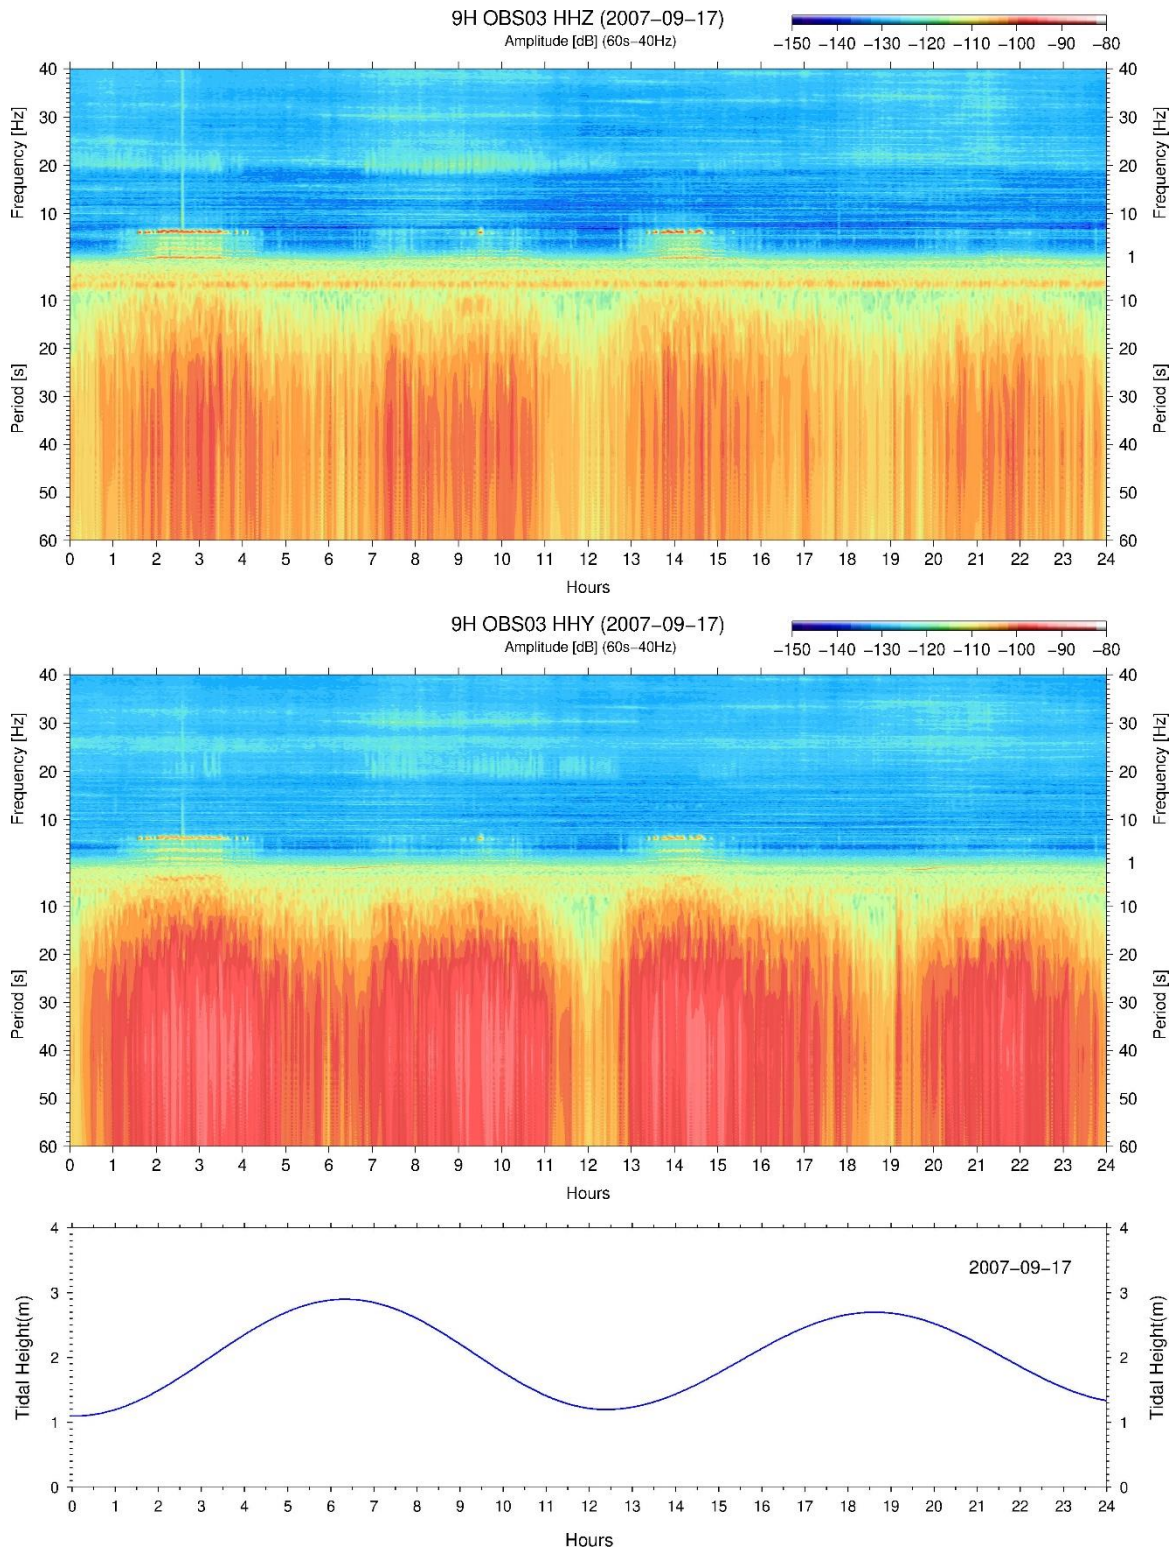

**Figure S8 | OBS01-OBS03 2007-09-17** – Day plot, the raw waveform in counts of the vertical Z and horizontal Y components, signals corrected for instrument response to display acceleration ( $m/s^2$ ) and filtered in the short and long period band, spectrogram and tidal height of Sines (maximum tidal range of 1.9m), showing the effect of tilt noise (20-60s), harmonic tremor (0.5-6Hz) and whales vocalisation (20-24Hz).

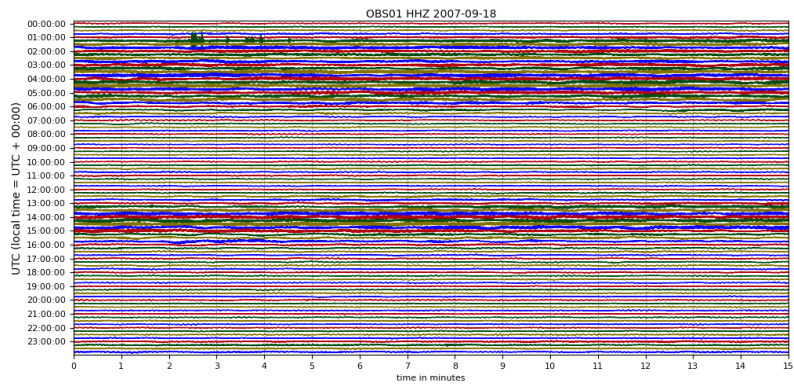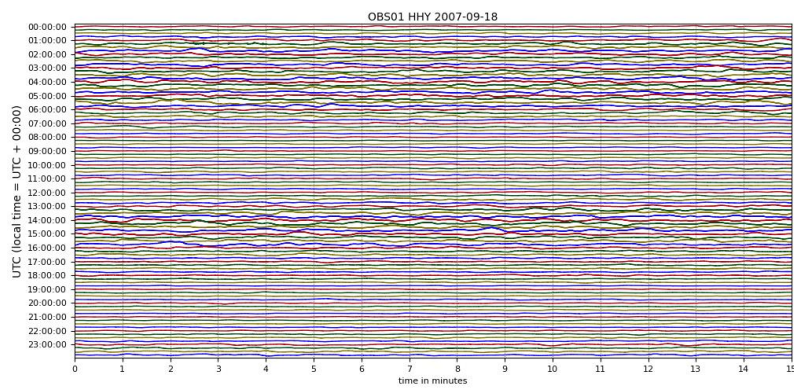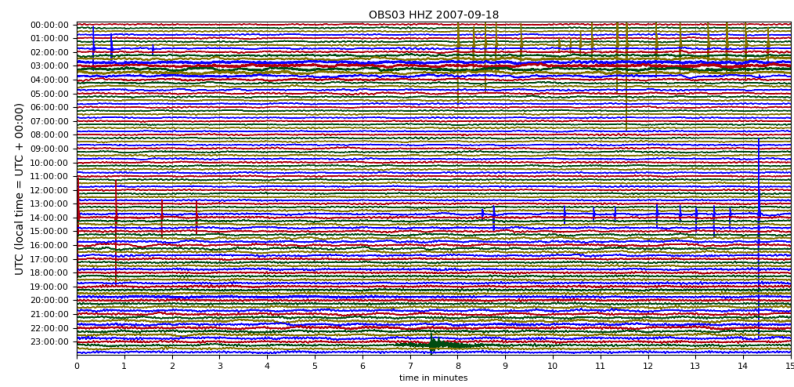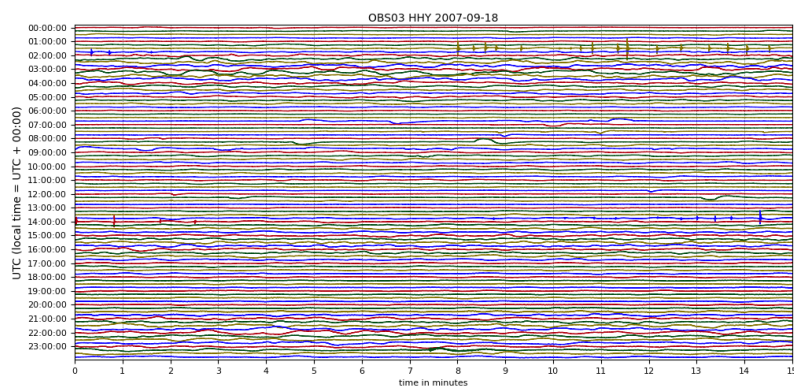

2007-09-18T00:00:00.02 - 2007-09-19T00:00:00.01

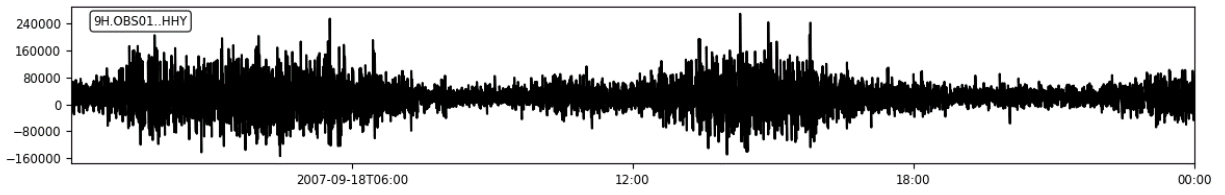

2007-09-18T00:00:00.02 - 2007-09-19T00:00:00.01

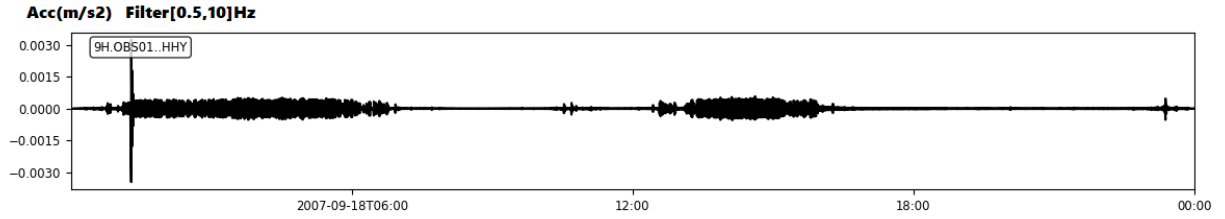

2007-09-18T00:00:00.02 - 2007-09-19T00:00:00.01

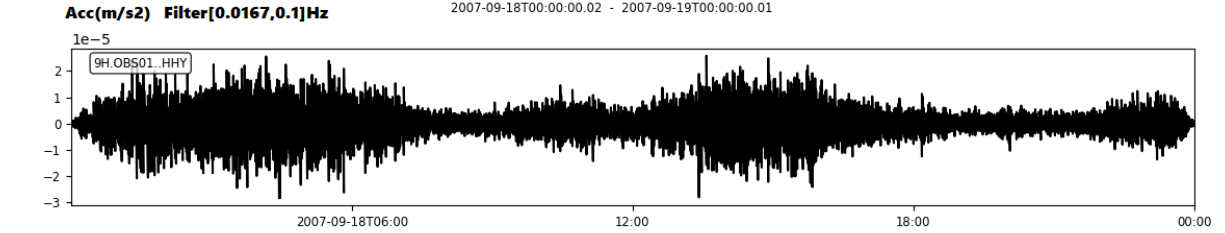

2007-09-18T00:00:00.03 - 2007-09-19T00:00:00.01

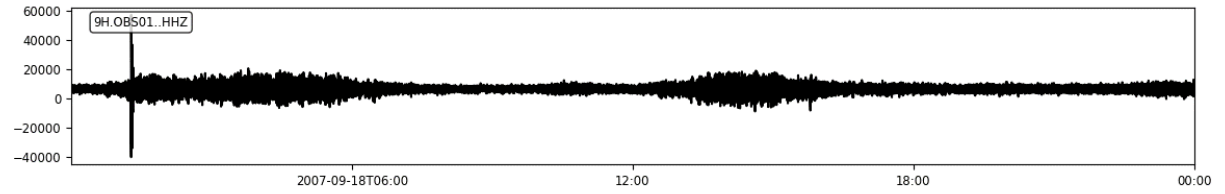

2007-09-18T00:00:00.03 - 2007-09-19T00:00:00.01

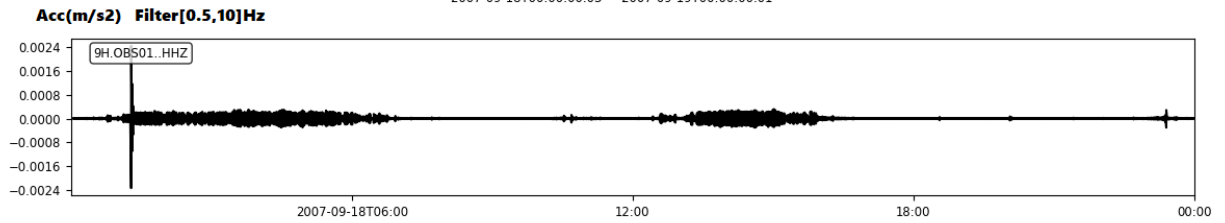

2007-09-18T00:00:00.03 - 2007-09-19T00:00:00.01

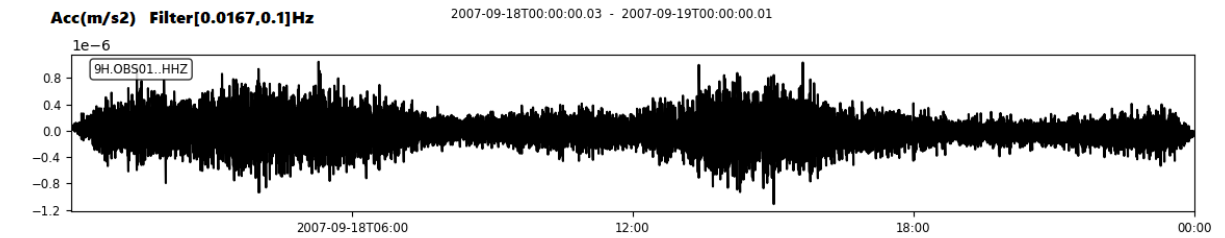

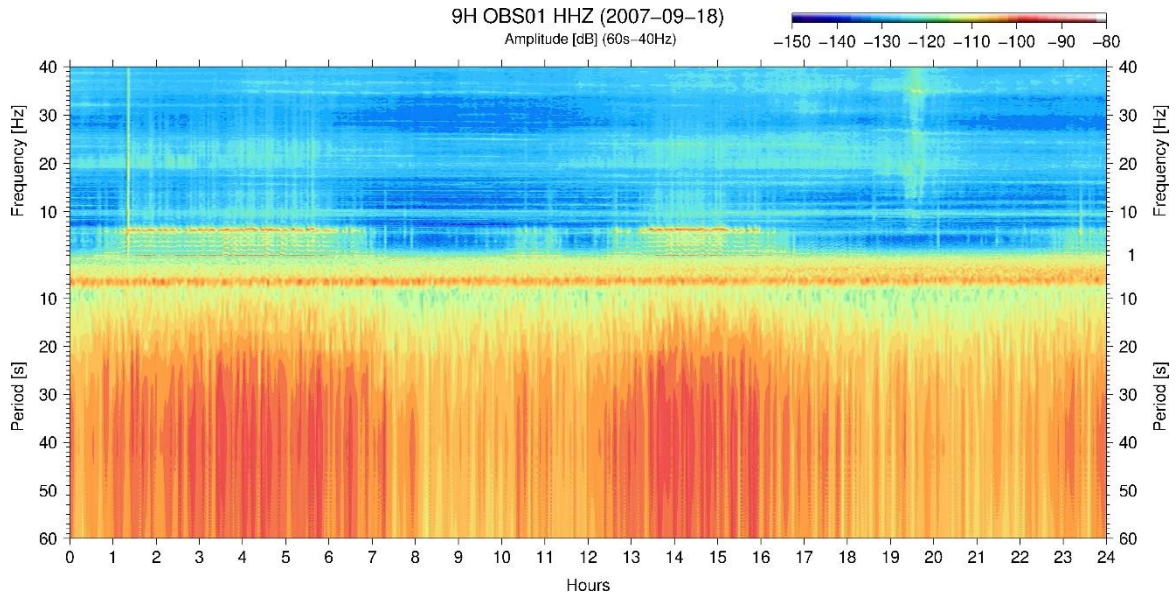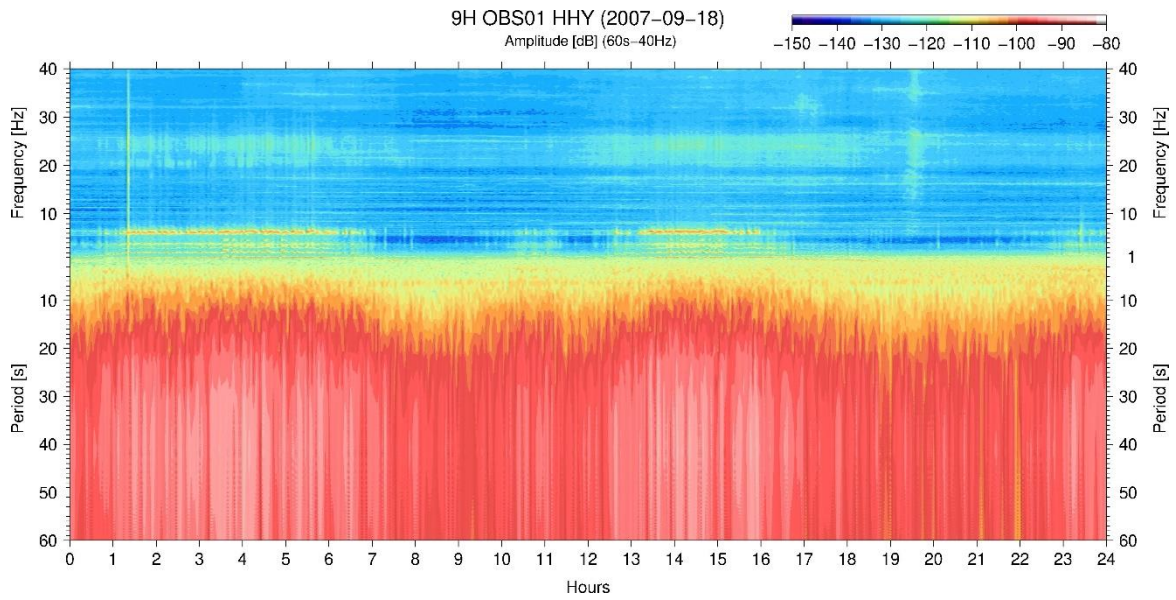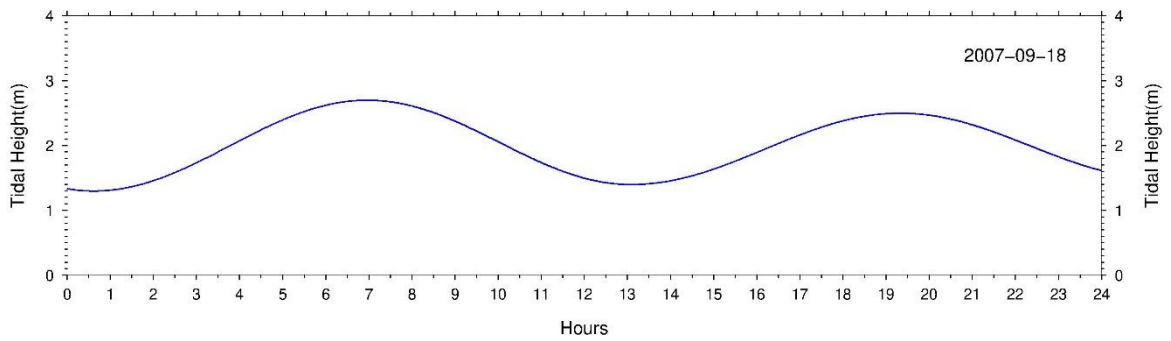

2007-09-18T00:00:00.03 - 2007-09-19T00:00:00

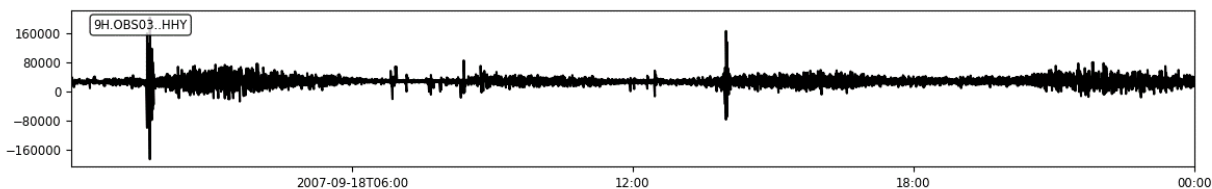

2007-09-18T00:00:00.03 - 2007-09-19T00:00:00

**Acc(m/s<sup>2</sup>) Filter[0.5,10]Hz**

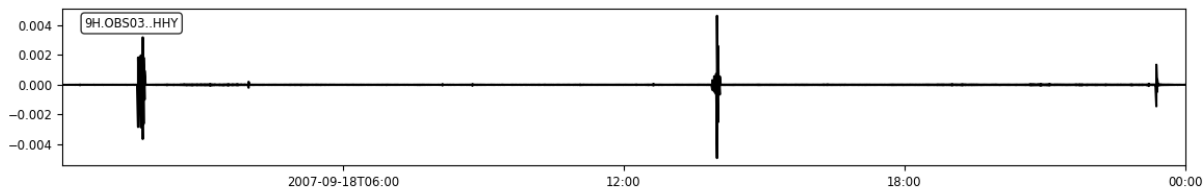

2007-09-18T00:00:00.03 - 2007-09-19T00:00:00

**Acc(m/s<sup>2</sup>) Filter[0.0167,0.1]Hz**

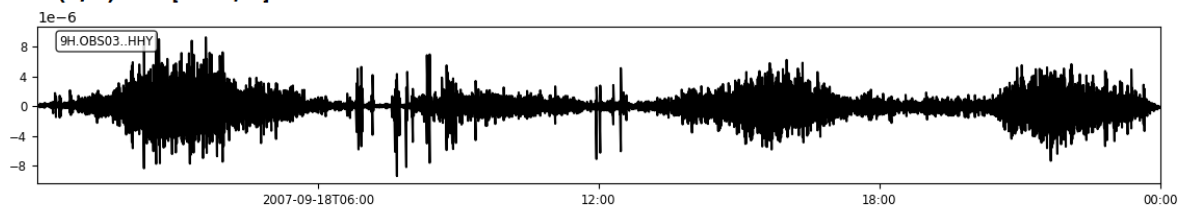

2007-09-18T00:00:00.01 - 2007-09-18T23:59:59.99

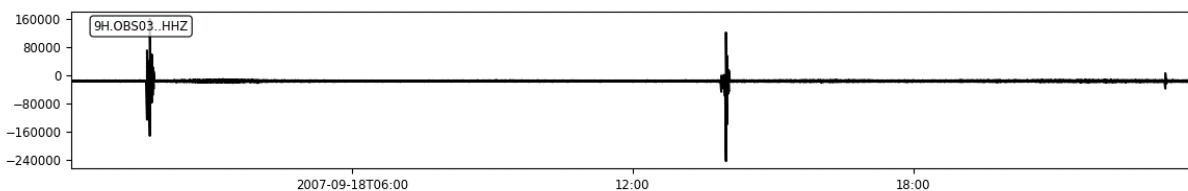

2007-09-18T00:00:00.01 - 2007-09-18T23:59:59.99

**Acc(m/s<sup>2</sup>) Filter[0.5,10]Hz**

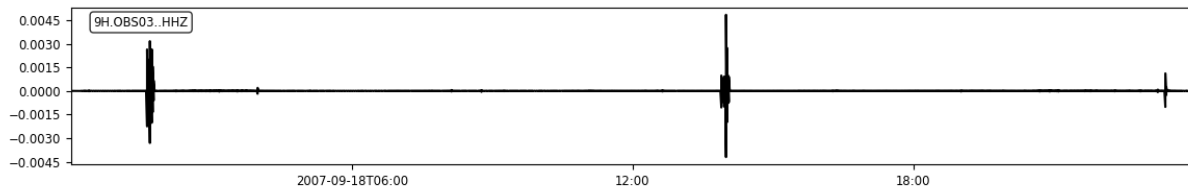

2007-09-18T00:00:00.01 - 2007-09-18T23:59:59.99

**Acc(m/s<sup>2</sup>) Filter[0.0167,0.1]Hz**

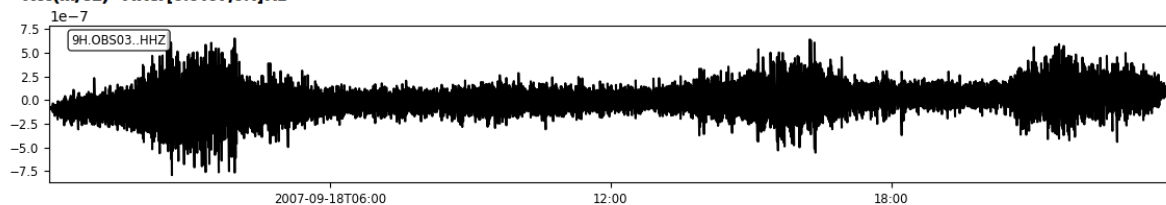



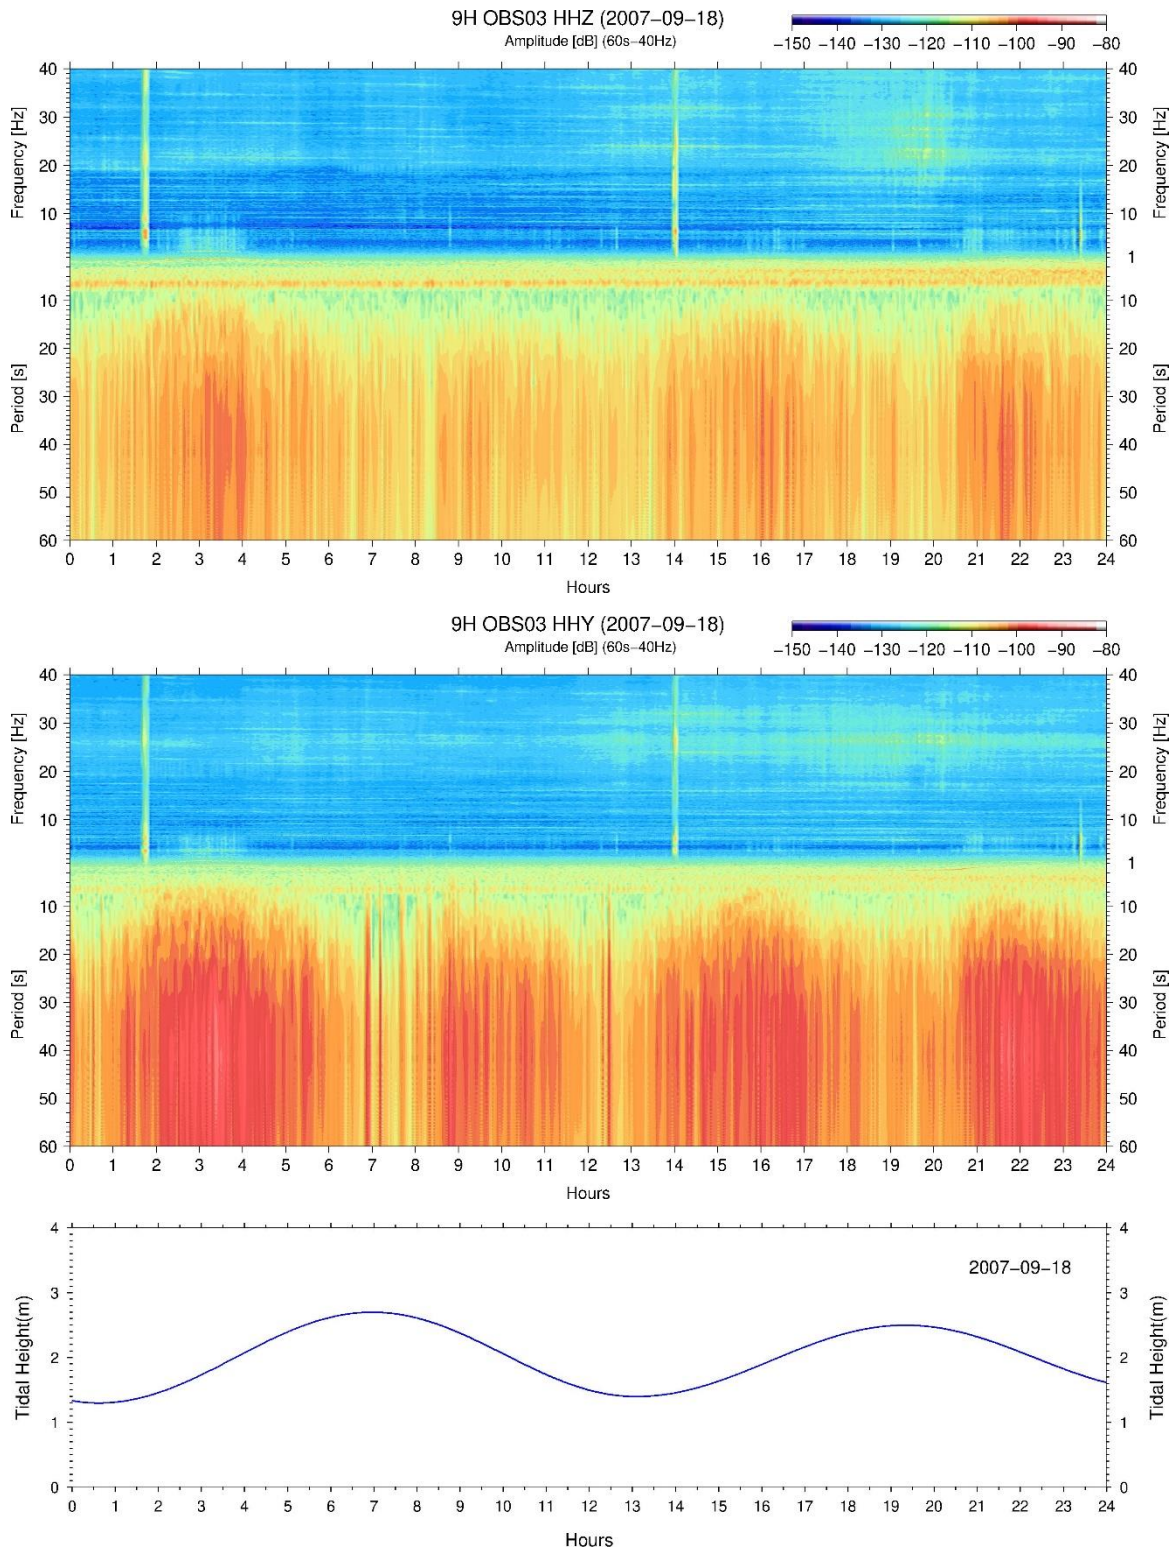

**Figure S9 | OBS01-OBS03 2007-09-18** – Day plot, the raw waveform in counts of the vertical Z and horizontal Y components, signals corrected for instrument response to show acceleration ( $m/s^2$ ) and filtered in the short and long period band, spectrogram and tidal height of Sines (maximum tidal range of 1.5m), showing the effect of tilt noise (20-60s), harmonic tremor (0.5-6Hz) and short duration events.

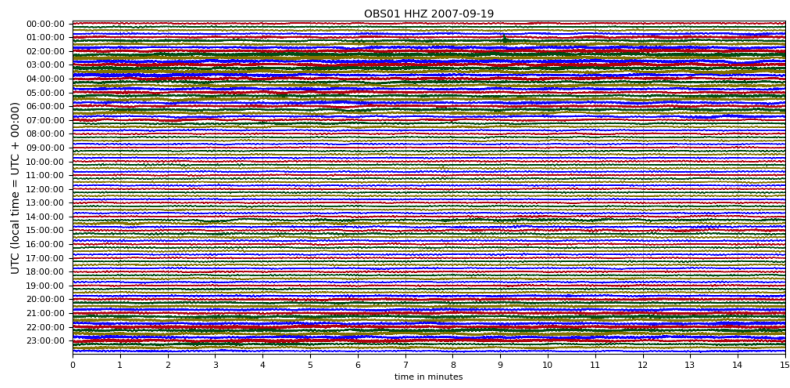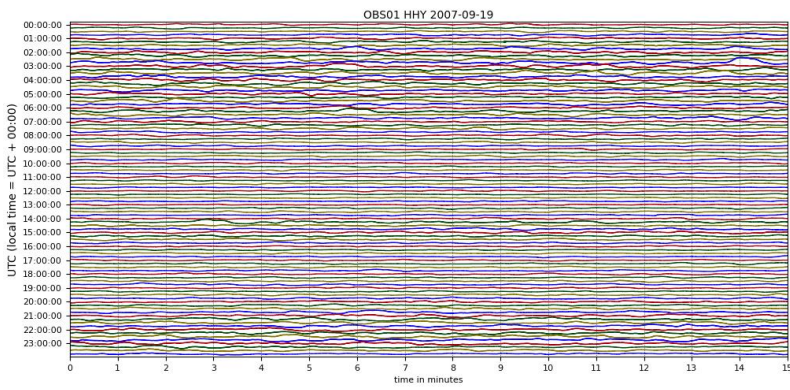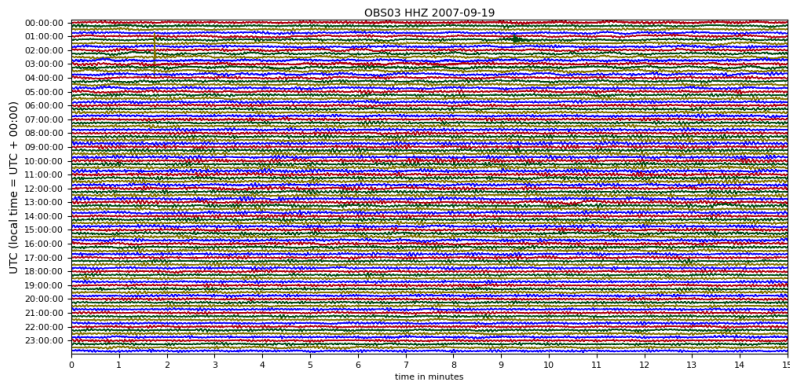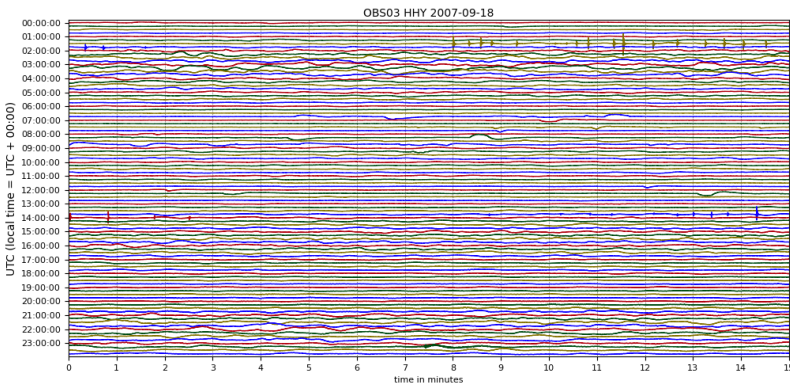

2007-09-19T00:00:00.02 - 2007-09-20T00:00:00.01

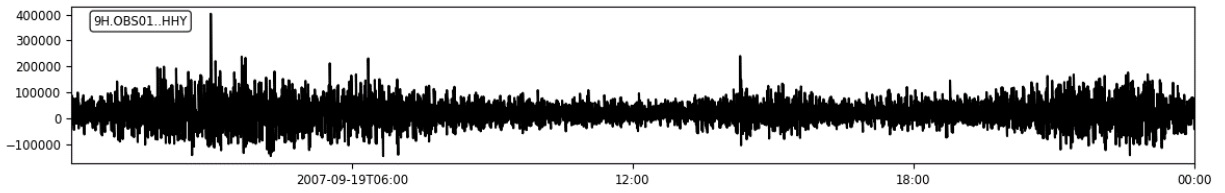

2007-09-19T00:00:00.02 - 2007-09-20T00:00:00.01

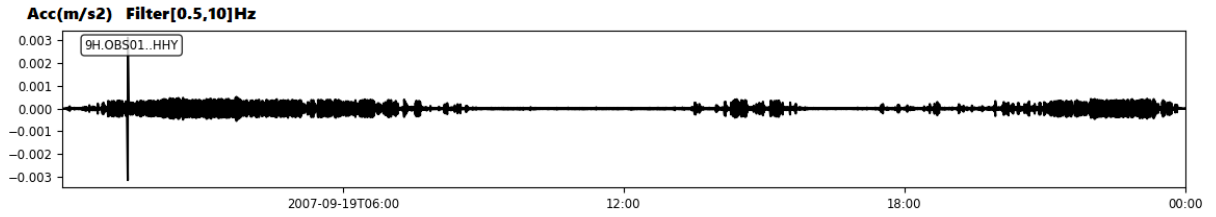

2007-09-19T00:00:00.02 - 2007-09-20T00:00:00.01

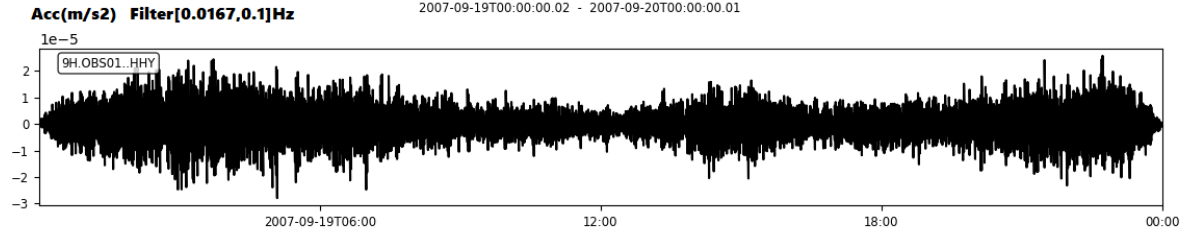

2007-09-19T00:00:00.02 - 2007-09-20T00:00:00.01

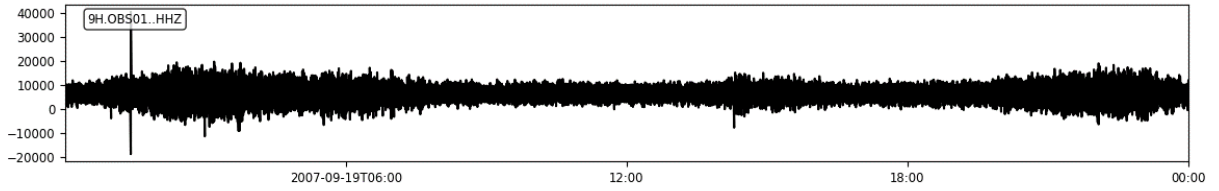

2007-09-19T00:00:00.02 - 2007-09-20T00:00:00.01

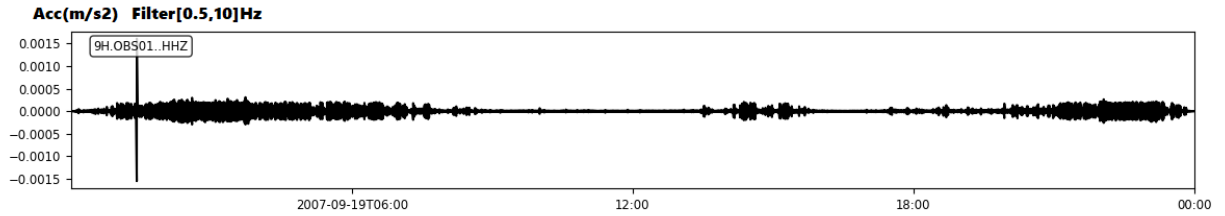

2007-09-19T00:00:00.02 - 2007-09-20T00:00:00.01

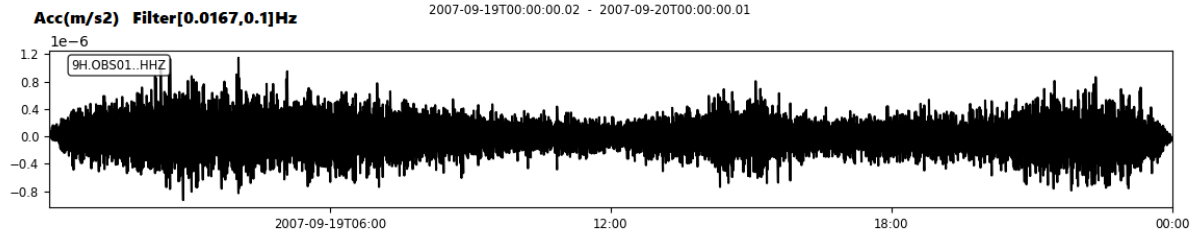

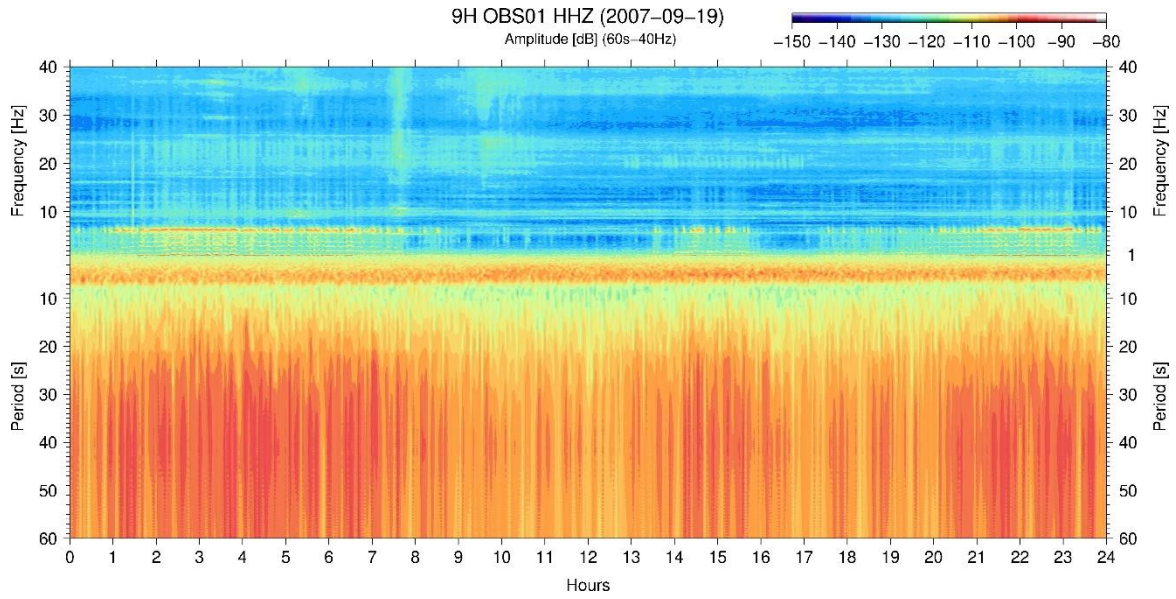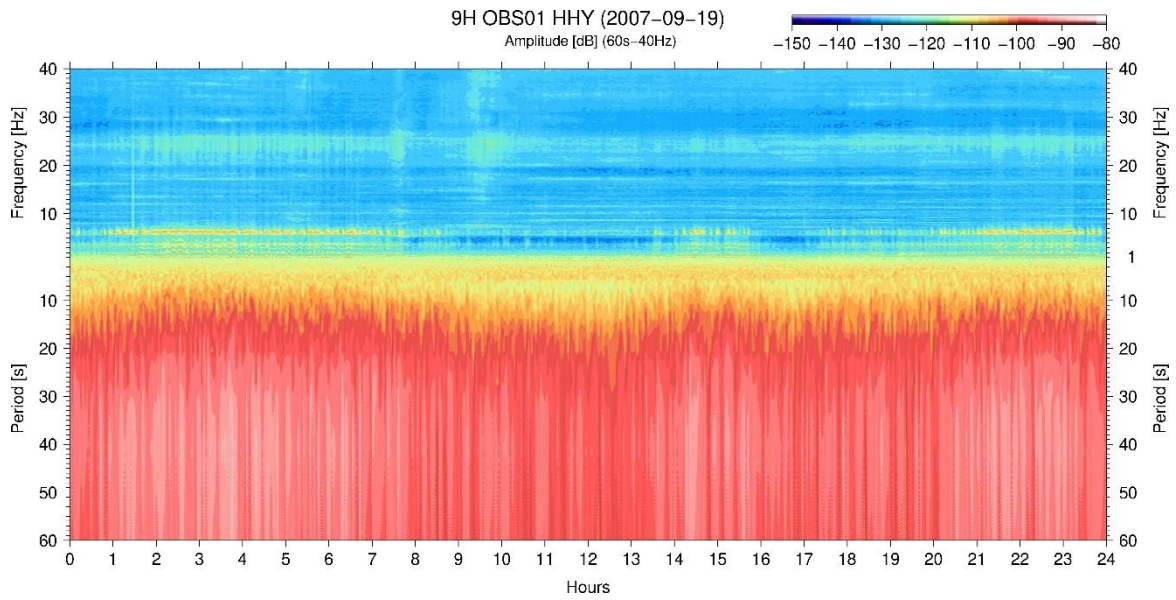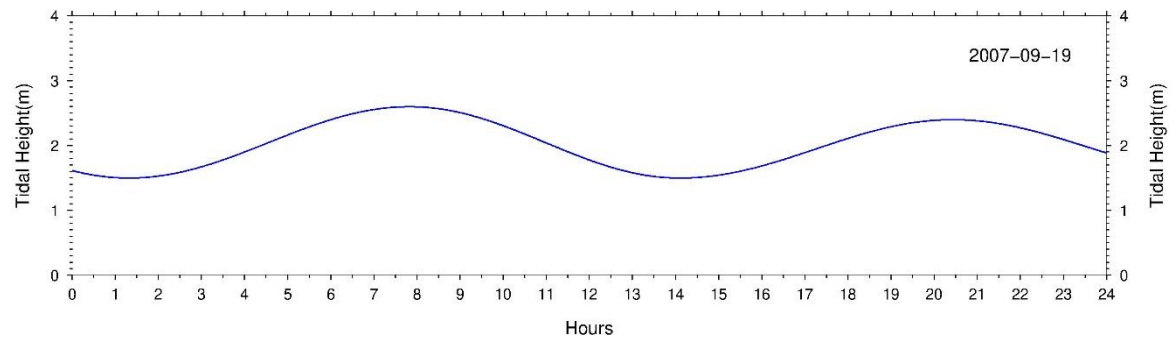

2007-09-19T00:00:00.01 - 2007-09-20T00:00:00

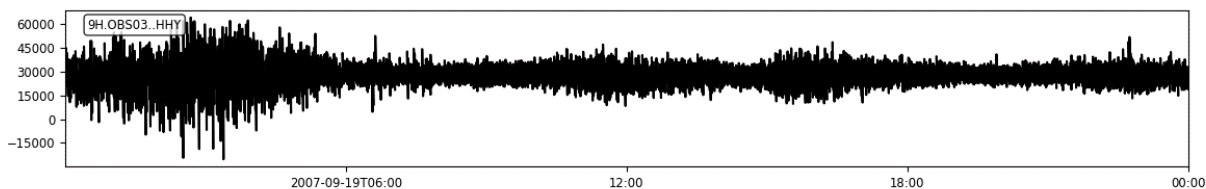

2007-09-19T00:00:00.01 - 2007-09-20T00:00:00

**Acc(m/s<sup>2</sup>) Filter[0.5,10]Hz**

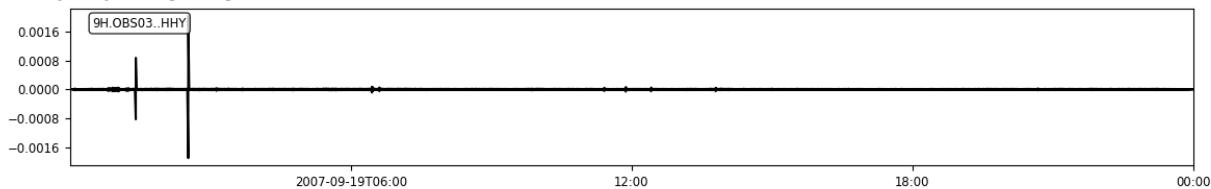

2007-09-19T00:00:00.01 - 2007-09-20T00:00:00

**Acc(m/s<sup>2</sup>) Filter[0.0167,0.1]Hz**

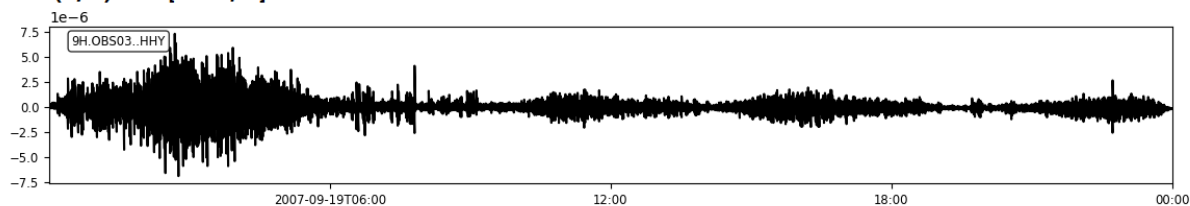

2007-09-19T00:00:00 - 2007-09-20T00:00:00.01

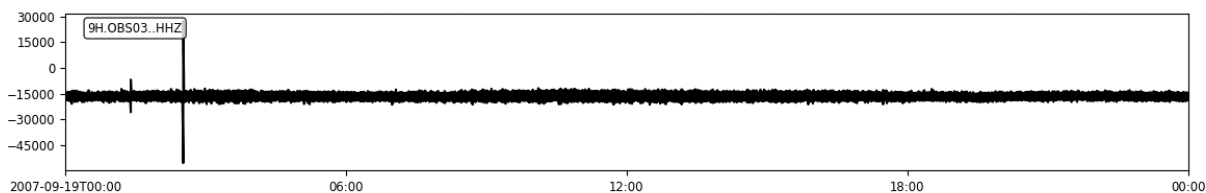

2007-09-19T00:00:00 - 2007-09-20T00:00:00.01

**Acc(m/s<sup>2</sup>) Filter[0.5,10]Hz**

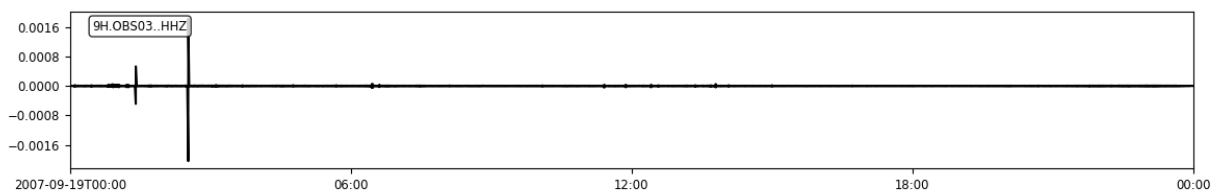

2007-09-19T00:00:00 - 2007-09-20T00:00:00.01

**Acc(m/s<sup>2</sup>) Filter[0.0167,0.1]Hz**

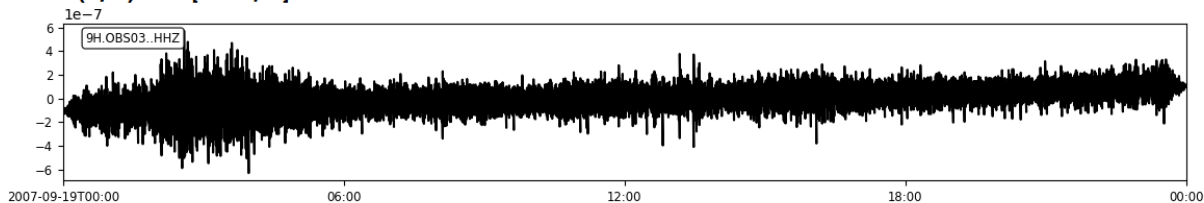

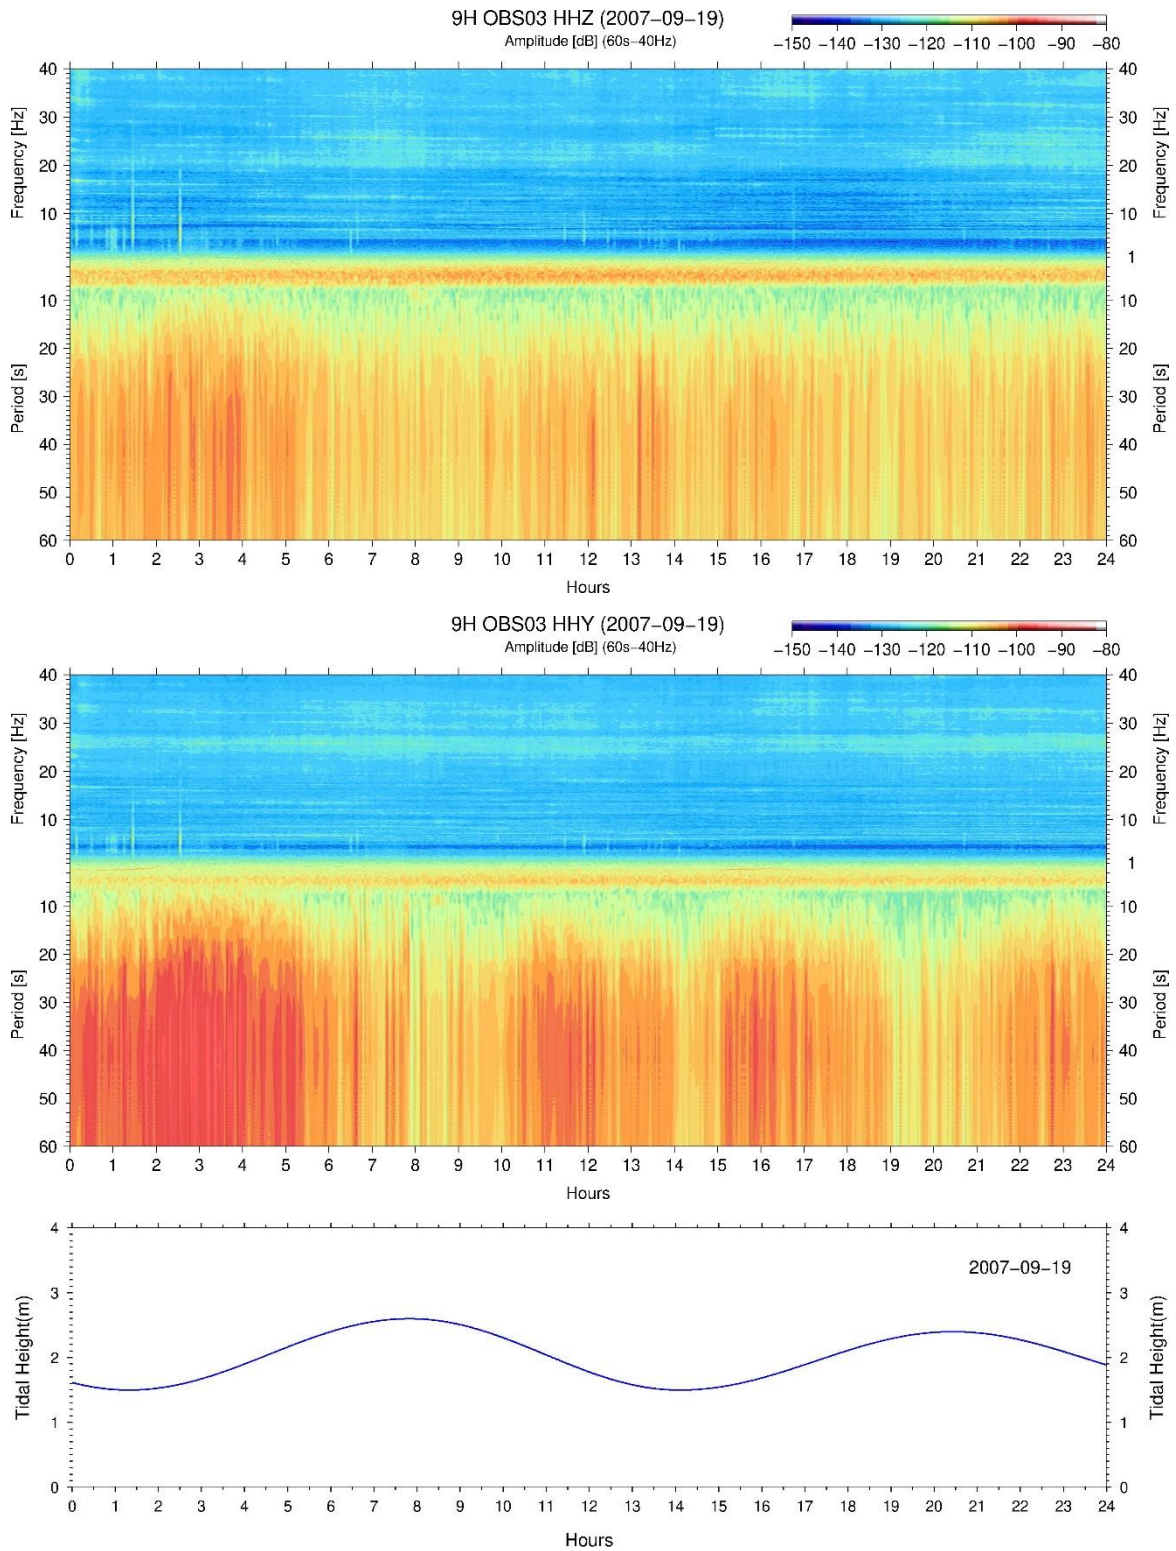

**Figure S10 | OBS01-OBS03 2007-09-19** – Day plot, the raw waveform in counts of the vertical Z and horizontal Y components, signals corrected for instrument response to show acceleration ( $m/s^2$ ) and filtered in the short and long period band, spectrogram and tidal height of Sines (maximum tidal range of 1.2m), showing the effect of tilt noise (20-60s), harmonic tremor (0.5-6Hz) in OBS01 and short duration events in OBS03.

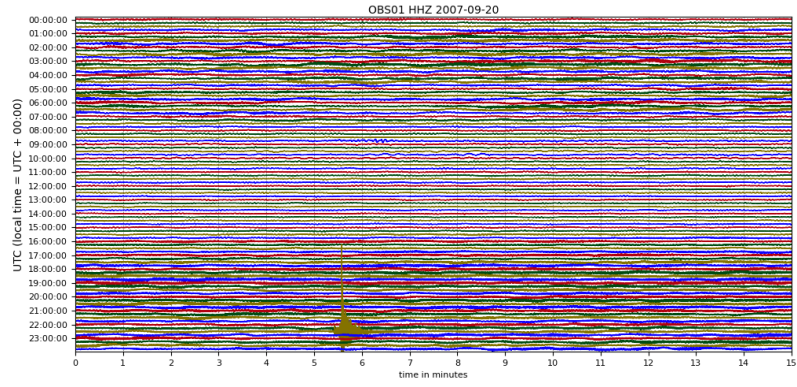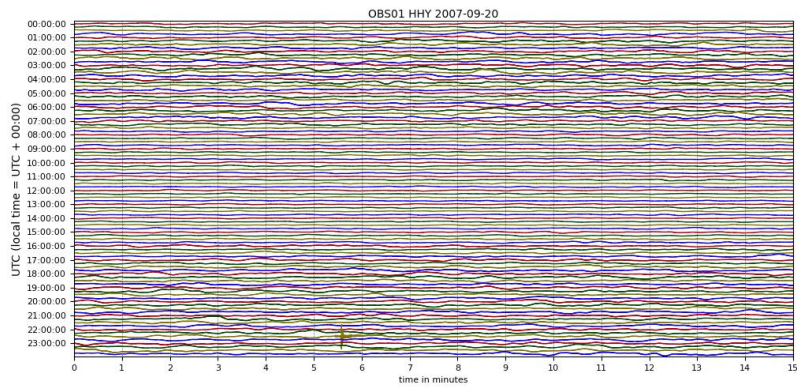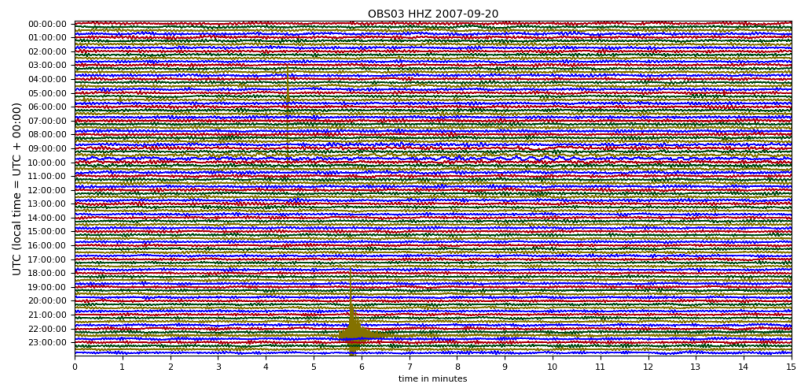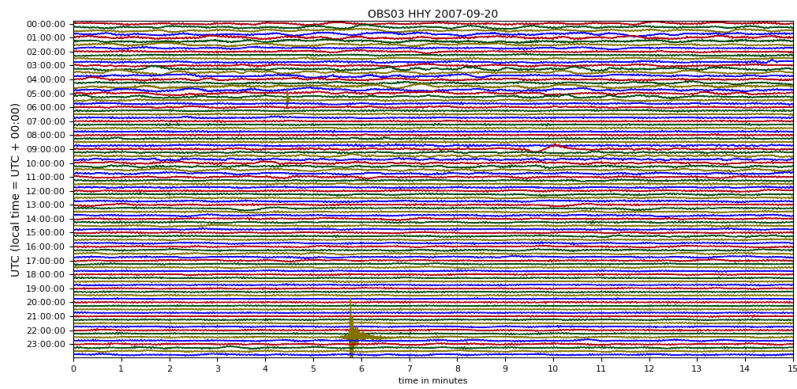

2007-09-20T00:00:00.02 - 2007-09-21T00:00:00

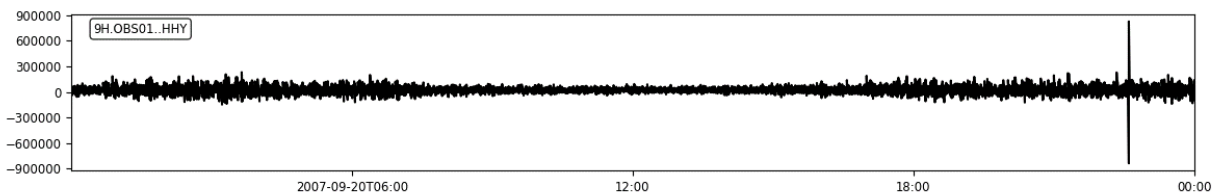

2007-09-20T00:00:00.02 - 2007-09-21T00:00:00

Acc(m/s<sup>2</sup>) Filter[0.1,10]Hz

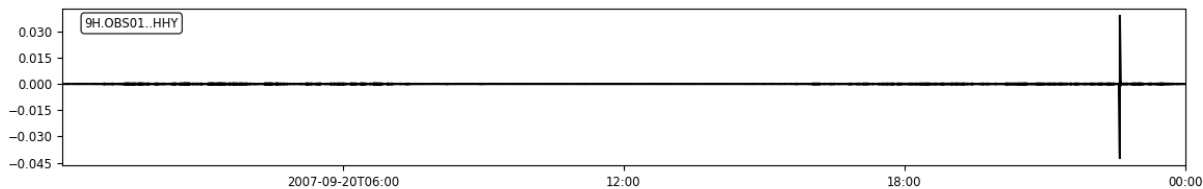

2007-09-20T00:00:00.02 - 2007-09-21T00:00:00

Acc(m/s<sup>2</sup>) Filter[0.0167,0.1]Hz

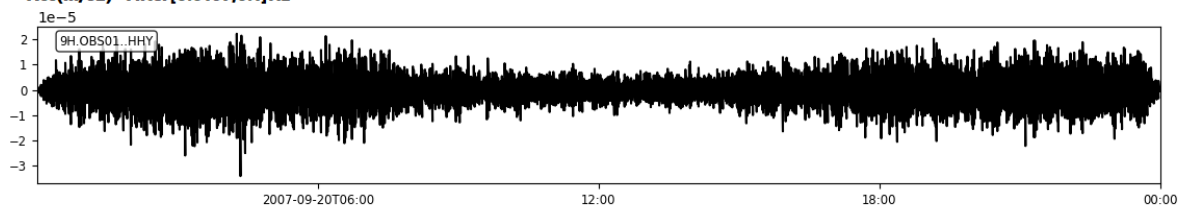

2007-09-20T00:00:00.02 - 2007-09-21T00:00:00.01

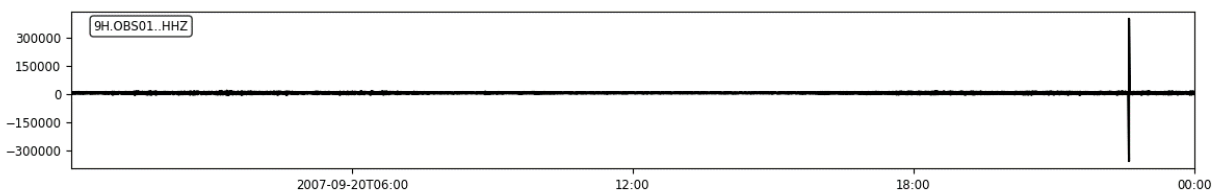

2007-09-20T00:00:00.02 - 2007-09-21T00:00:00.01

Acc(m/s<sup>2</sup>) Filter[0.5,10]Hz

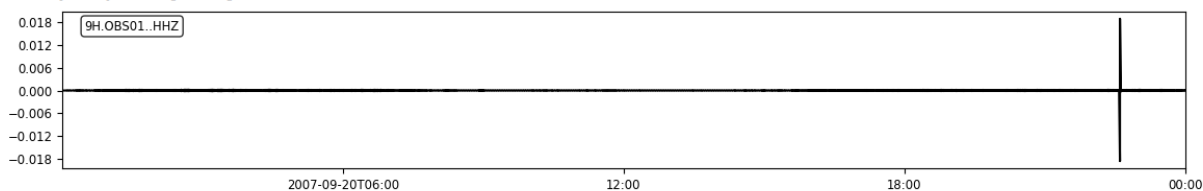

2007-09-20T00:00:00.02 - 2007-09-21T00:00:00.01

Acc(m/s<sup>2</sup>) Filter[0.0167,0.1]Hz

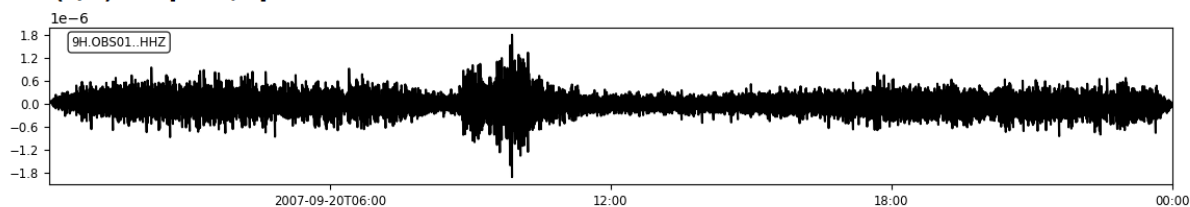



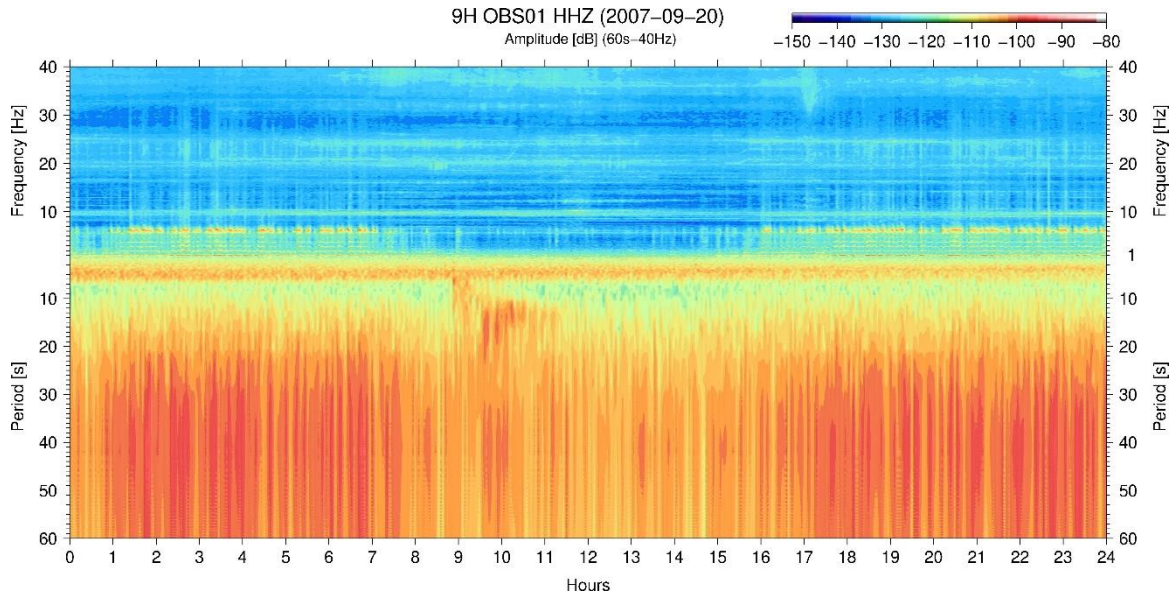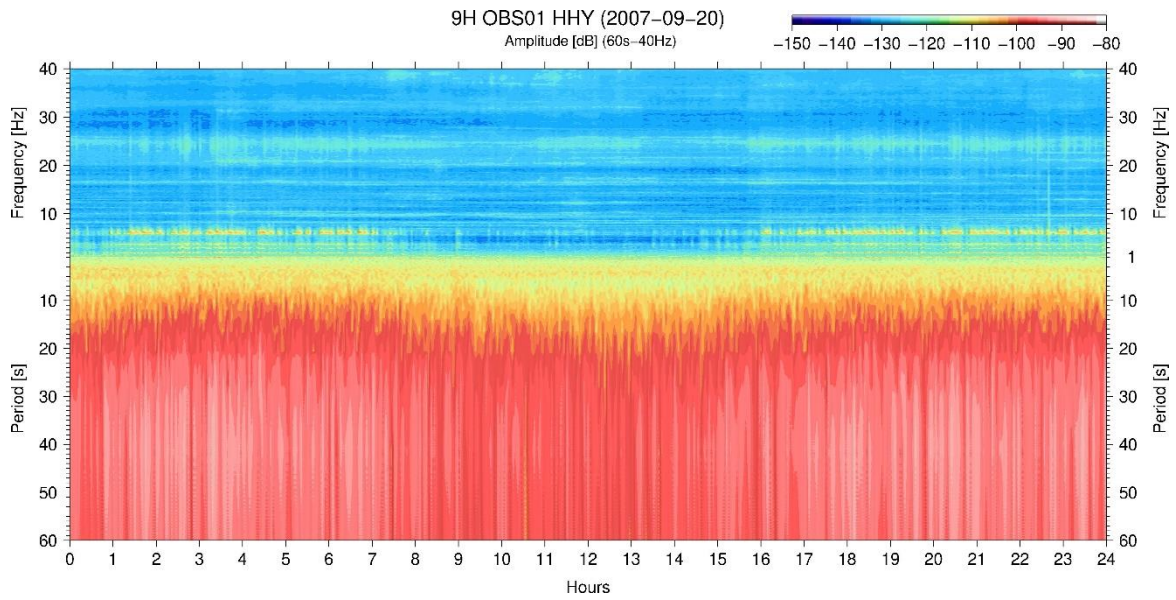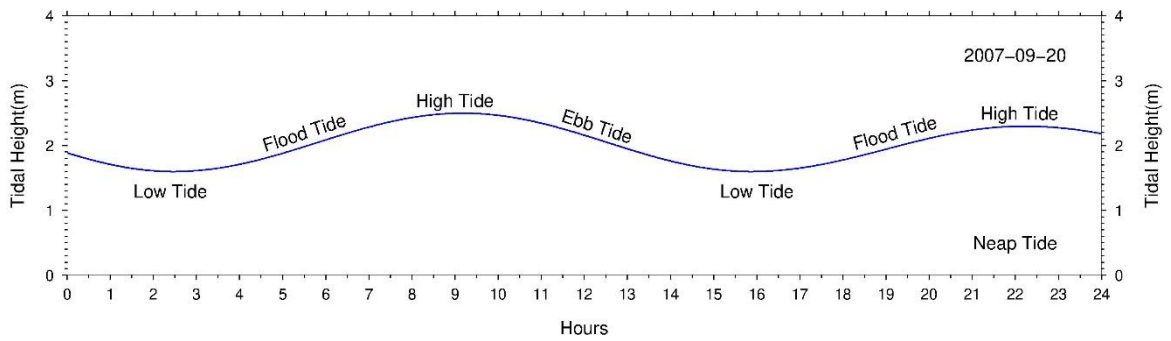

2007-09-20T00:00:00.01 - 2007-09-21T00:00:00.01

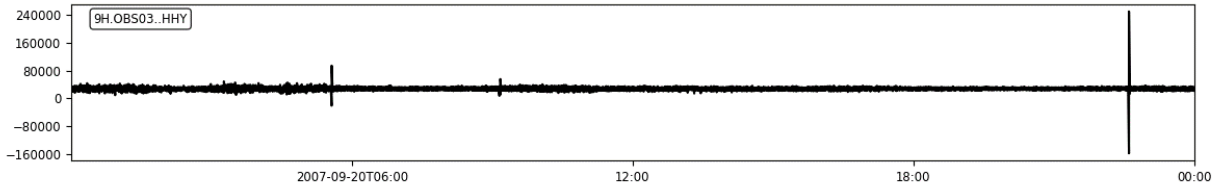

2007-09-20T00:00:00.01 - 2007-09-21T00:00:00.01

**Acc(m/s<sup>2</sup>) Filter[0.5,10]Hz**

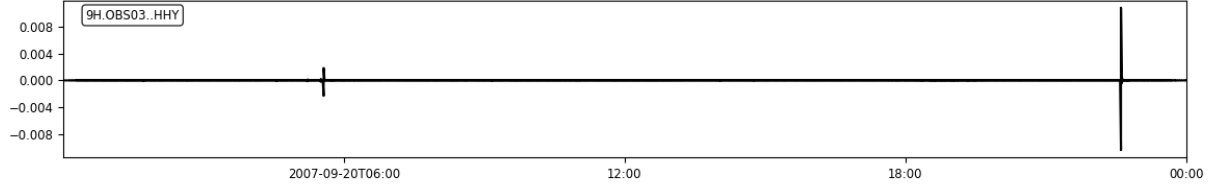

2007-09-20T00:00:00.01 - 2007-09-21T00:00:00.01

**Acc(m/s<sup>2</sup>) Filter[0.0167,0.1]Hz**

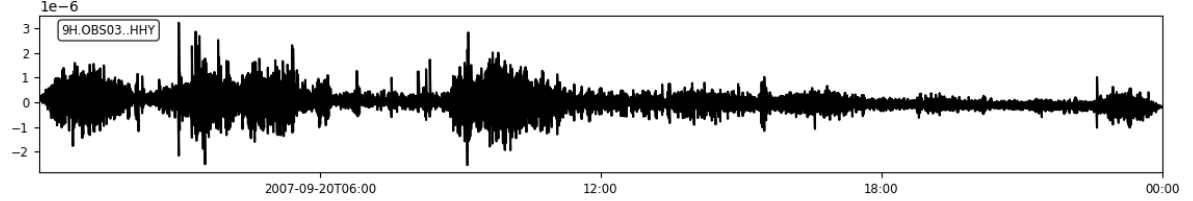

2007-09-20T00:00:00.02 - 2007-09-21T00:00:00.02

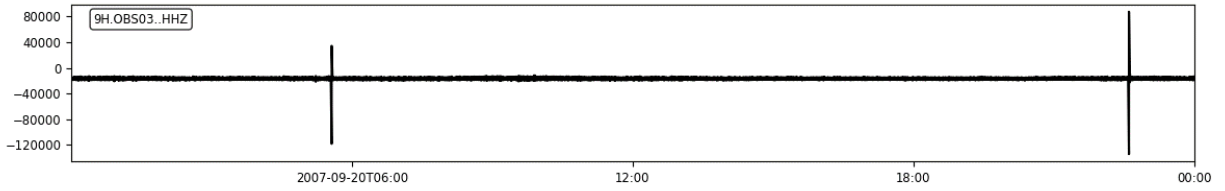

2007-09-20T00:00:00.02 - 2007-09-21T00:00:00.02

**Acc(m/s<sup>2</sup>) Filter[0.5,10]Hz**

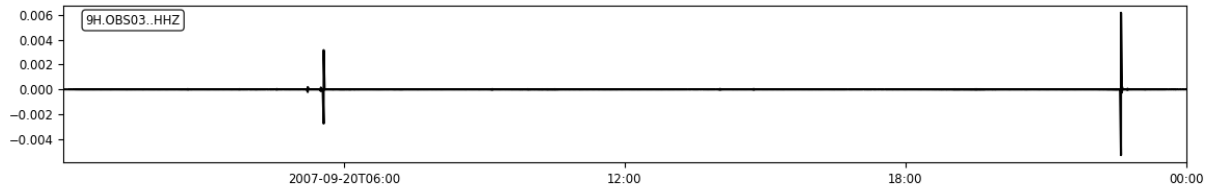

2007-09-20T00:00:00.02 - 2007-09-21T00:00:00.02

**Acc(m/s<sup>2</sup>) Filter[0.0167,0.1]Hz**

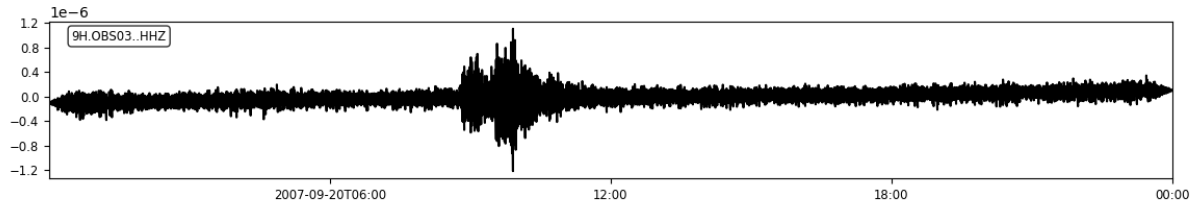

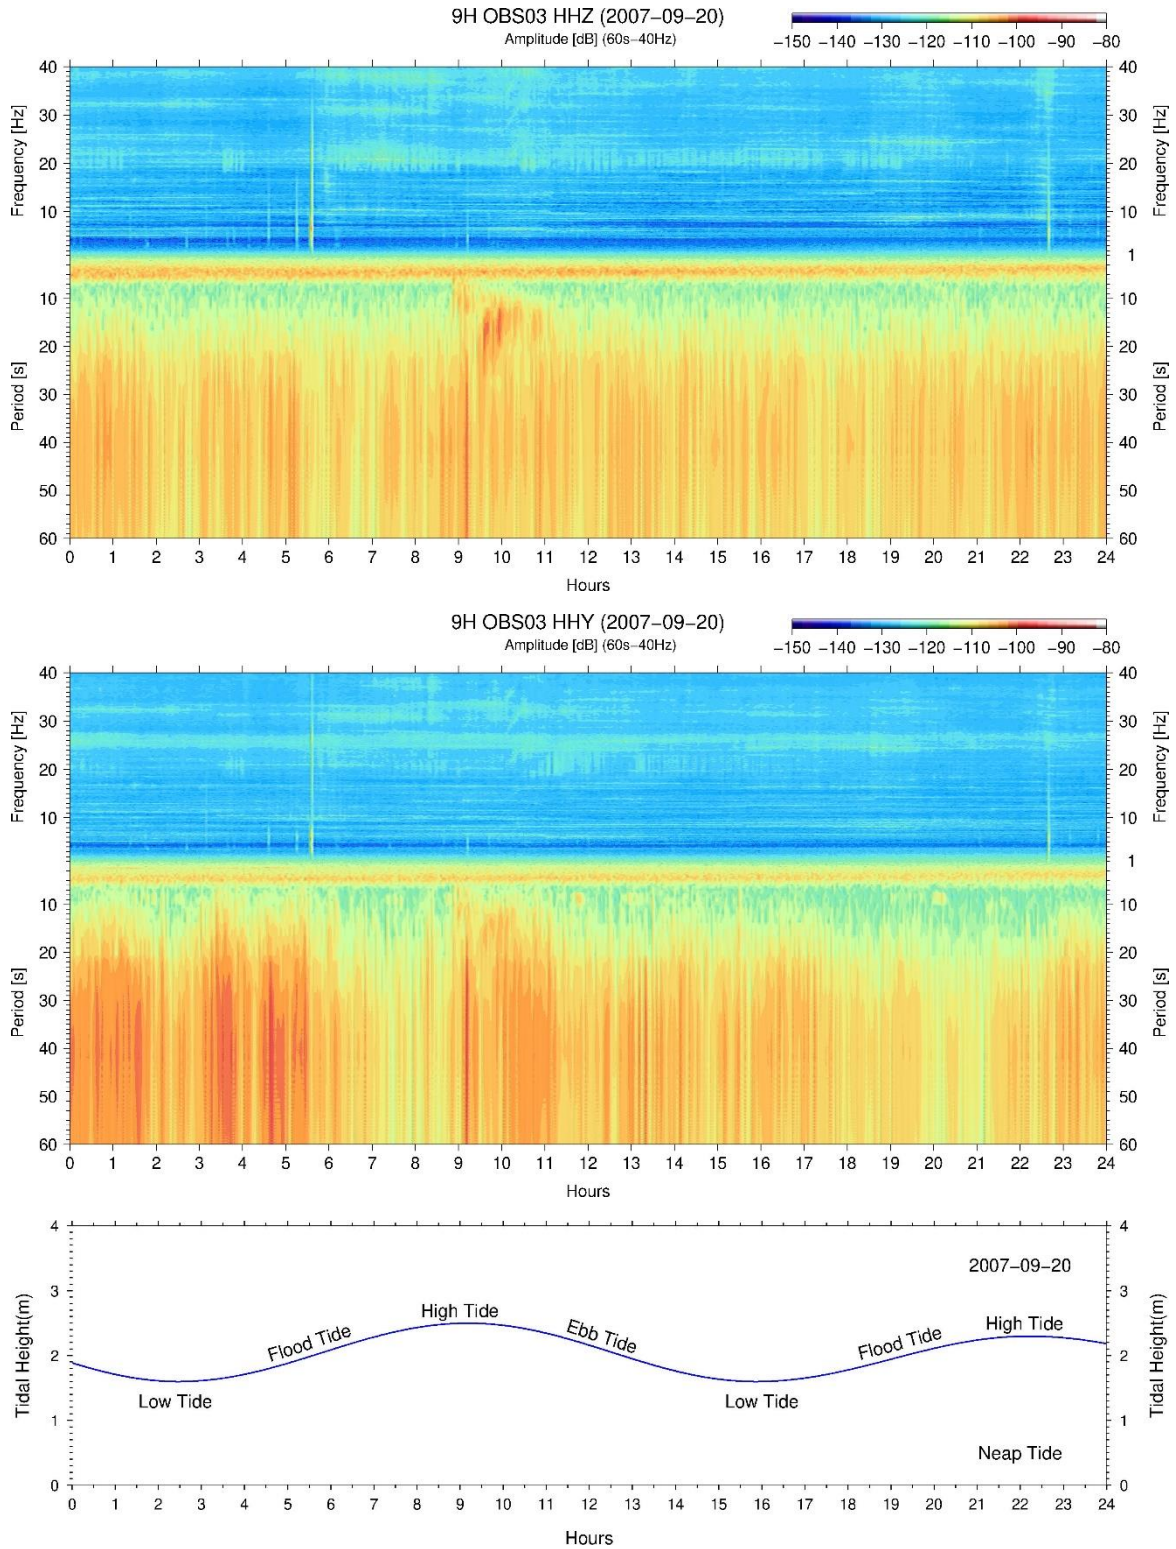

**Figure S11 | OBS01-OBS03 2007-09-20** – Day plot, the raw waveform in counts of the vertical Z and horizontal Y components, signals corrected for instrument response to show acceleration ( $\text{m/s}^2$ ) and filtered in the short and long period band, spectrogram and tidal height of Sines (maximum tidal range of 0.9m), showing one distant earthquake (Sumatra, Indonesia: origin time: 08:31:14, with Mw of 6.6), a regional earthquake (Azores-Cape S. Vincent: origin time: 22:35:21, with ML 3.2), the effect of tilt noise (20-60s), harmonic tremor (0.5-6Hz) in OBS01 and whales vocalization in OBS03 during neap tide.

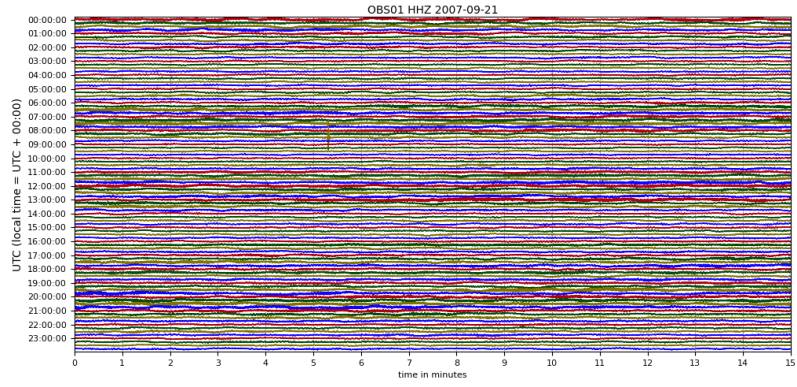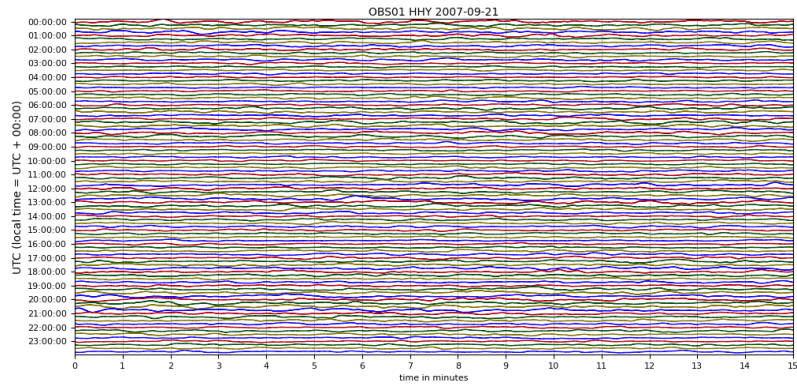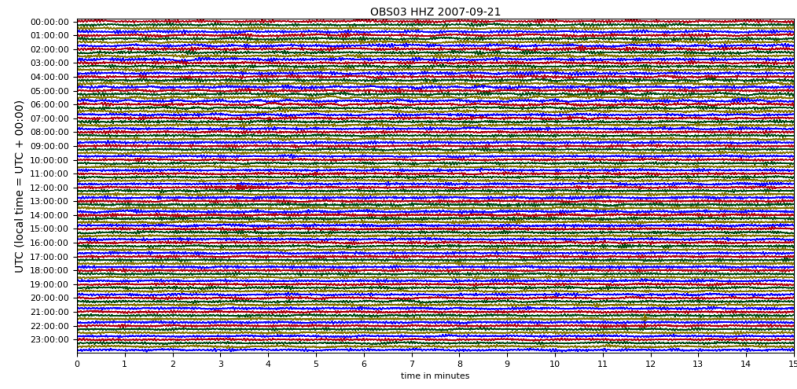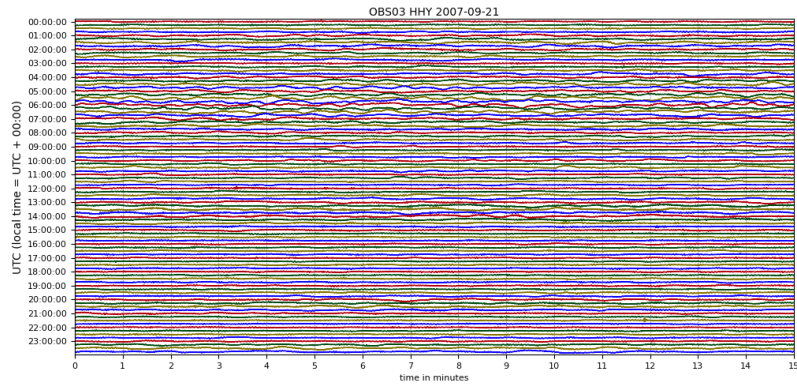

2007-09-21T00:00:00.01 - 2007-09-22T00:00:00.01

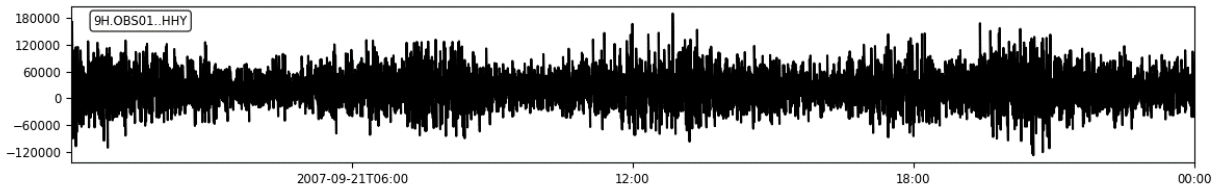

2007-09-21T00:00:00.01 - 2007-09-22T00:00:00.01

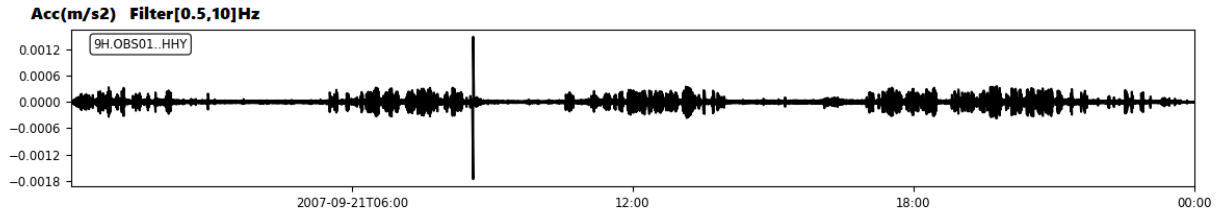

2007-09-21T00:00:00.01 - 2007-09-22T00:00:00.01

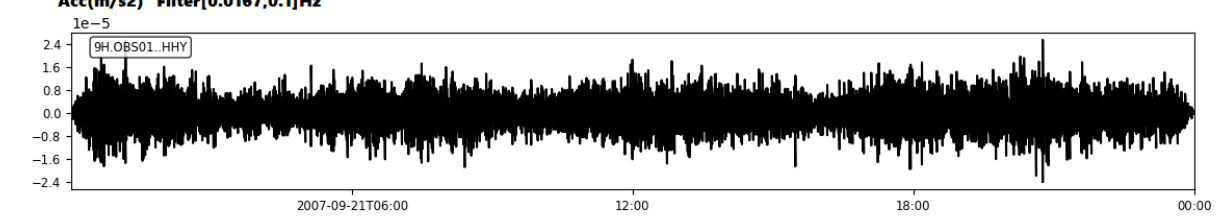

2007-09-21T00:00:00.02 - 2007-09-22T00:00:00.01

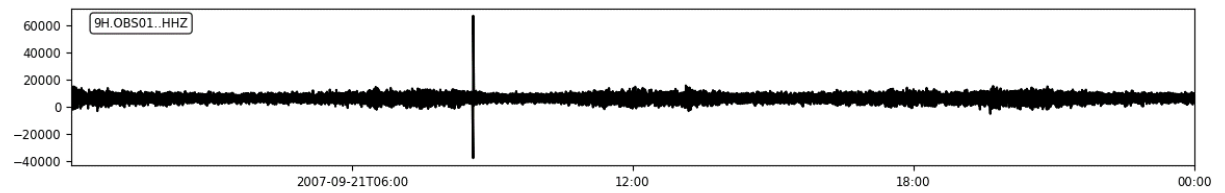

2007-09-21T00:00:00.02 - 2007-09-22T00:00:00.01

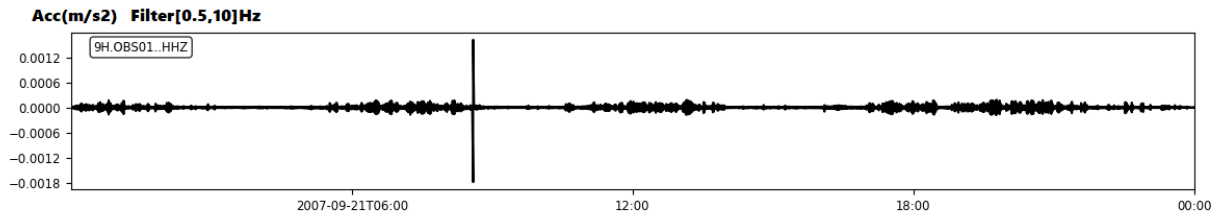

2007-09-21T00:00:00.02 - 2007-09-22T00:00:00.01

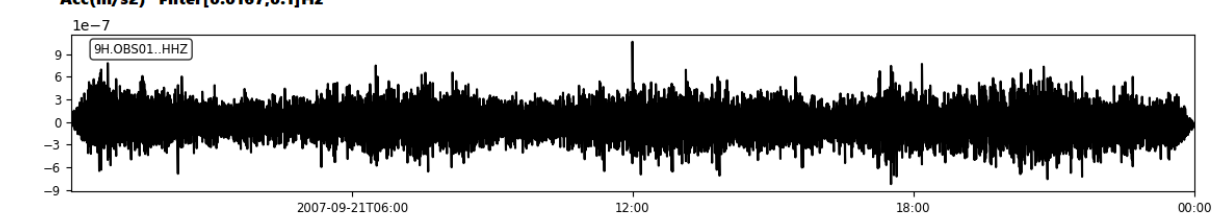

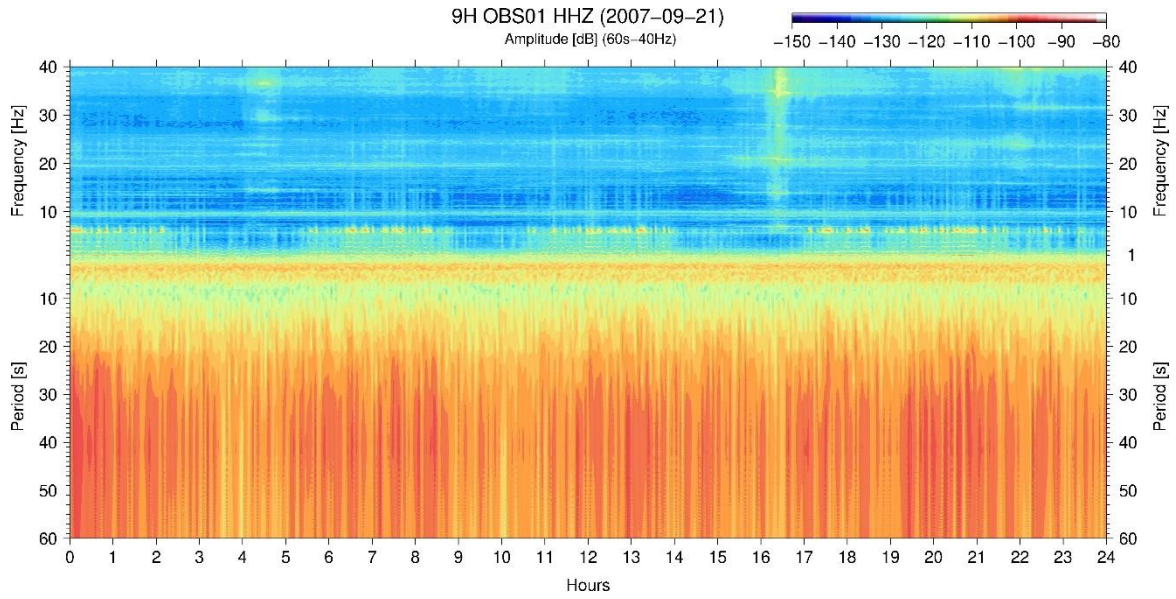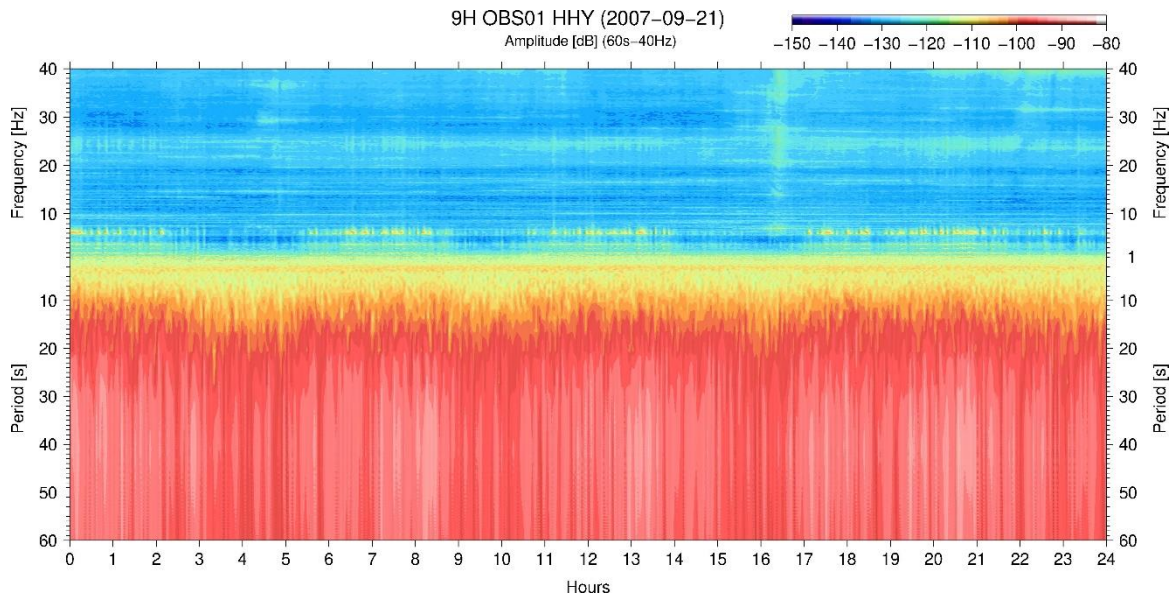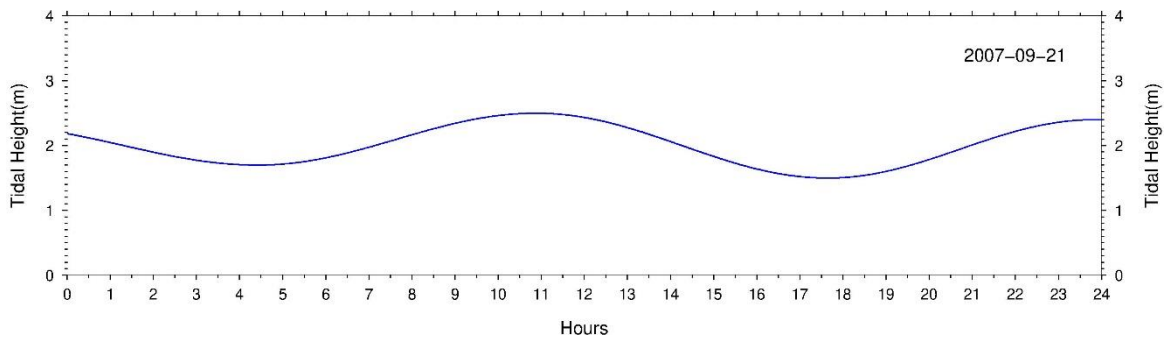

2007-09-21T00:00:00.02 - 2007-09-22T00:00:00.01

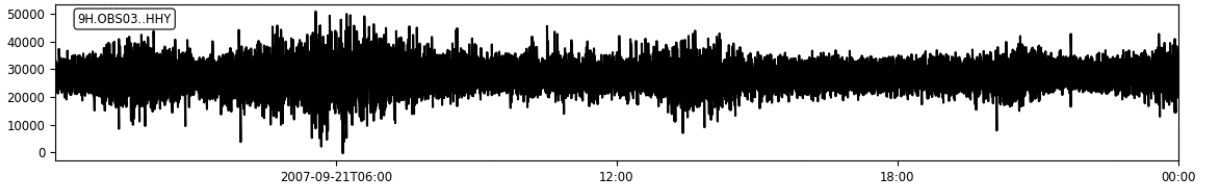

2007-09-21T00:00:00.02 - 2007-09-22T00:00:00.01

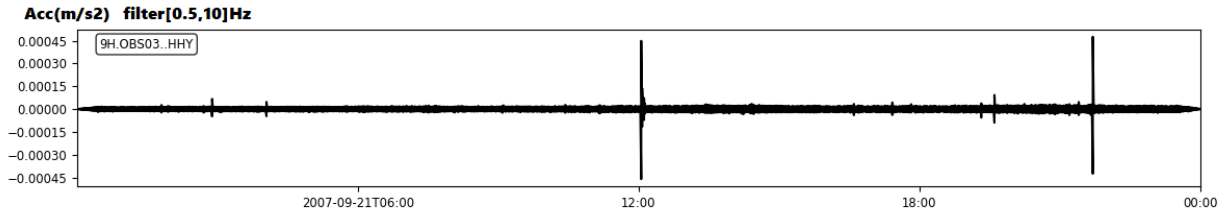

2007-09-21T00:00:00.02 - 2007-09-22T00:00:00.01

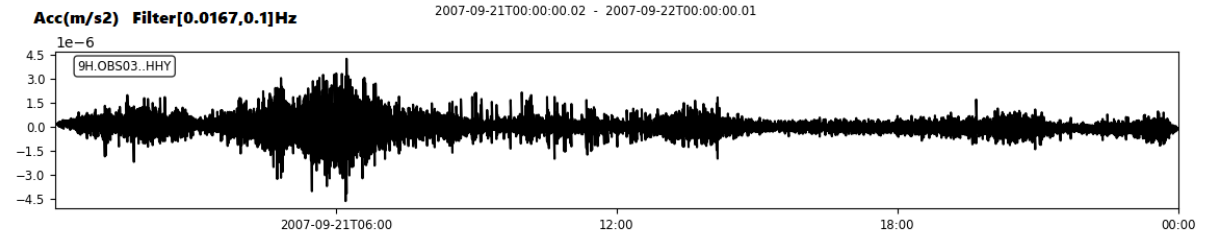

2007-09-21T00:00:00.03 - 2007-09-22T00:00:00.02

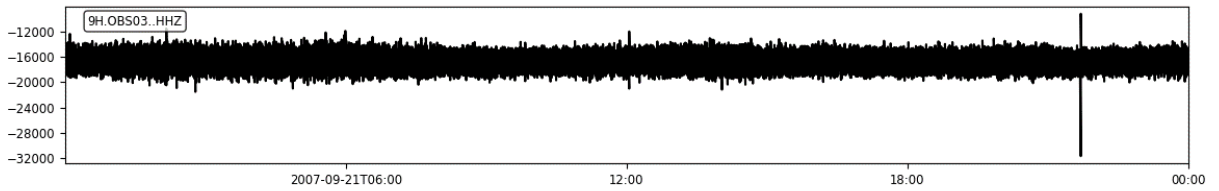

2007-09-21T00:00:00.03 - 2007-09-22T00:00:00.02

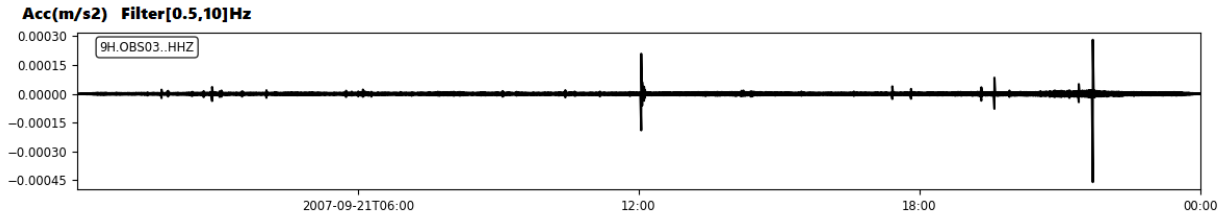

2007-09-21T00:00:00.03 - 2007-09-22T00:00:00.02

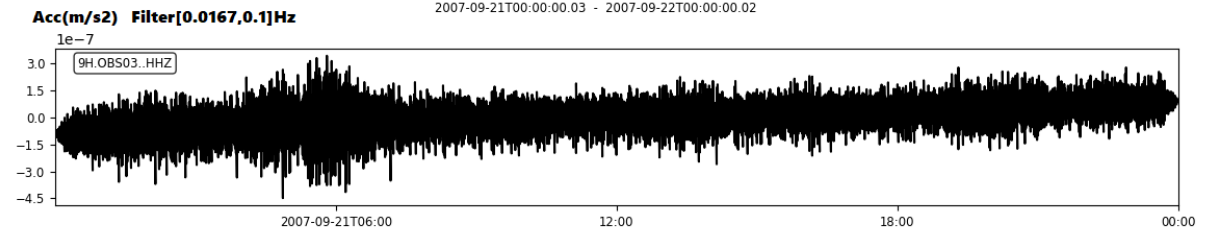

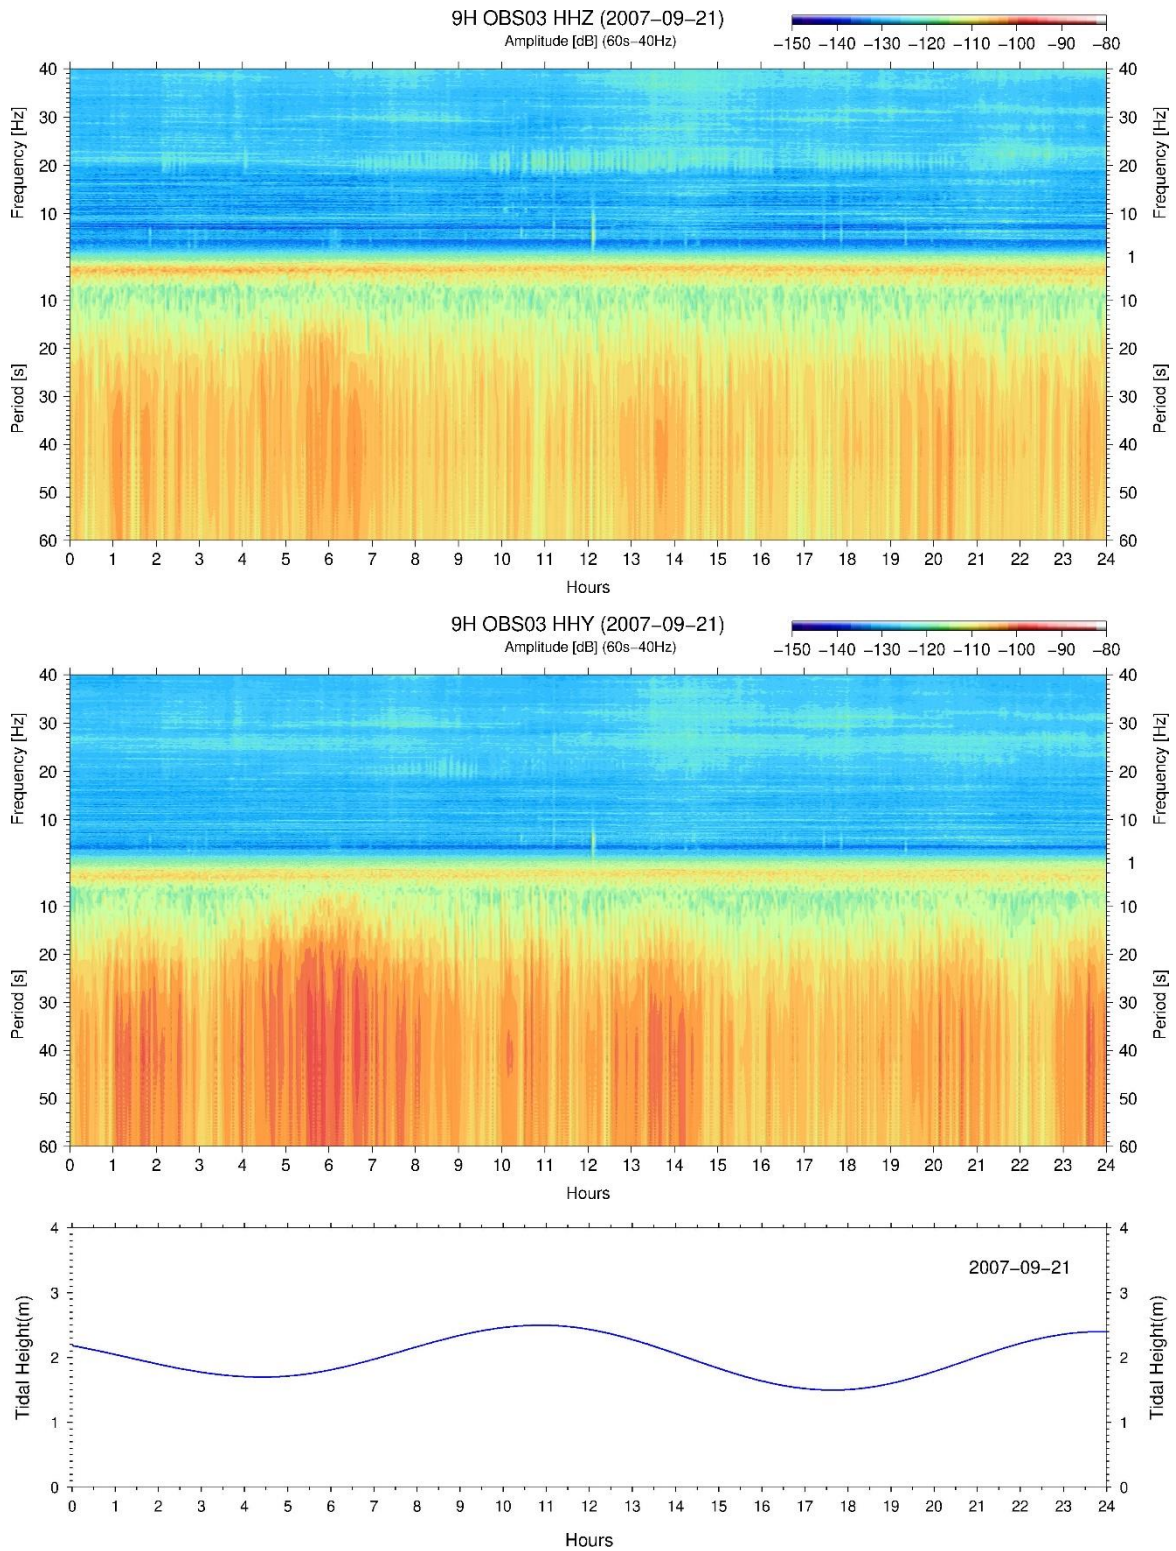

**Figure S12 | OBS01-OBS03 2007-09-21** – Day plot, the raw waveform in counts of the vertical Z and horizontal Y components, signals corrected for instrument response to show acceleration ( $m/s^2$ ) and filtered in the short and long period band, spectrogram and tidal height of Sines (maximum tidal range of 1.0m), showing the effect of tilt noise (20-60s), harmonic tremor (0.5-6Hz) in OBS01 and whale vocalisation (20-24Hz) in OBS03 during neap tide.



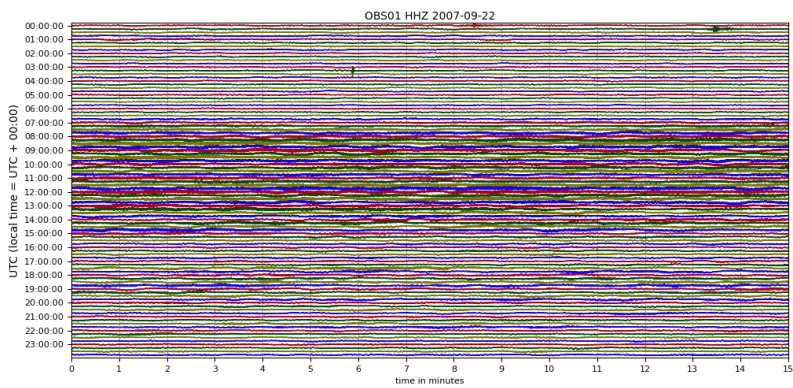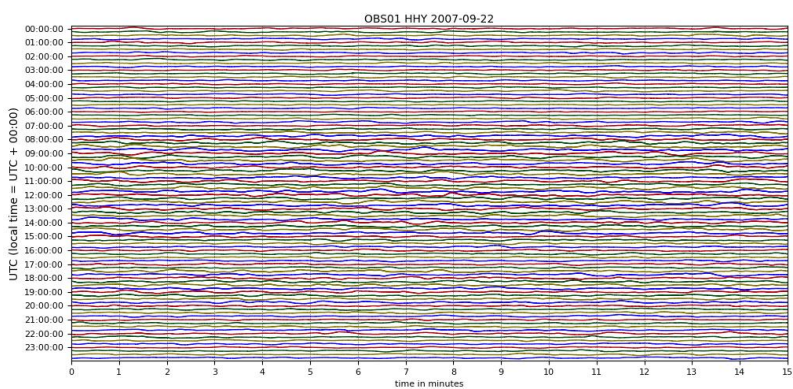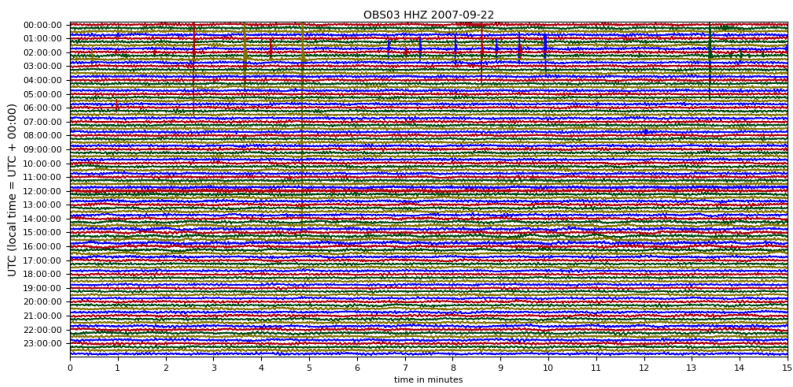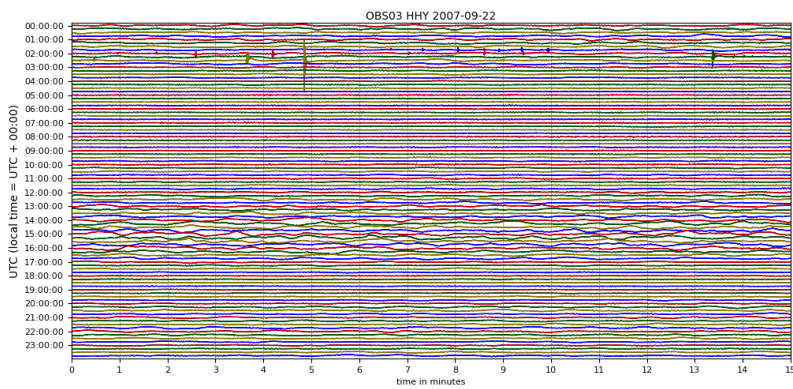

2007-09-22T00:00:00.02 - 2007-09-22T23:59:59.99

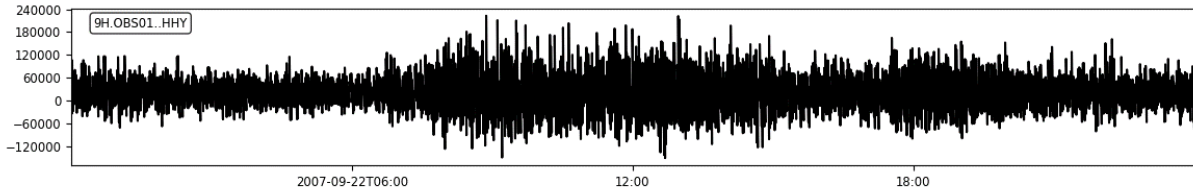

2007-09-22T00:00:00.02 - 2007-09-22T23:59:59.99

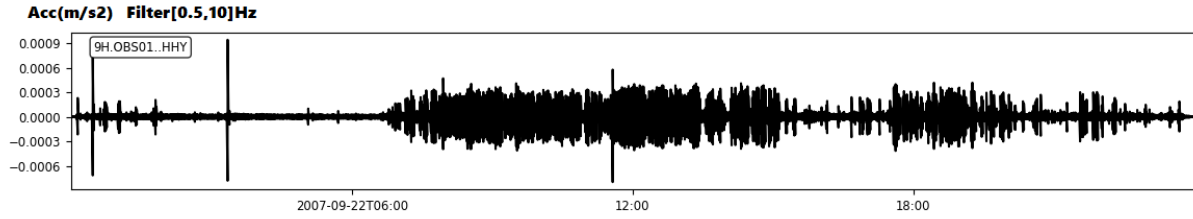

2007-09-22T00:00:00.02 - 2007-09-22T23:59:59.99

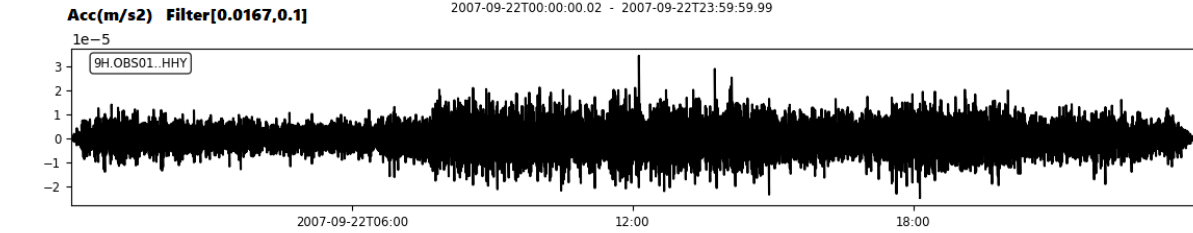

2007-09-22T00:00:00.02 - 2007-09-23T00:00:00.01

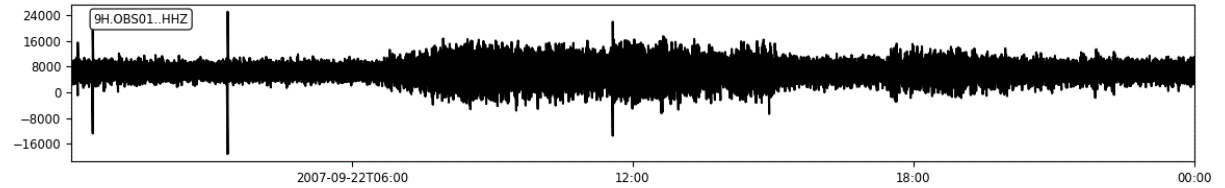

2007-09-22T00:00:00.02 - 2007-09-23T00:00:00.01

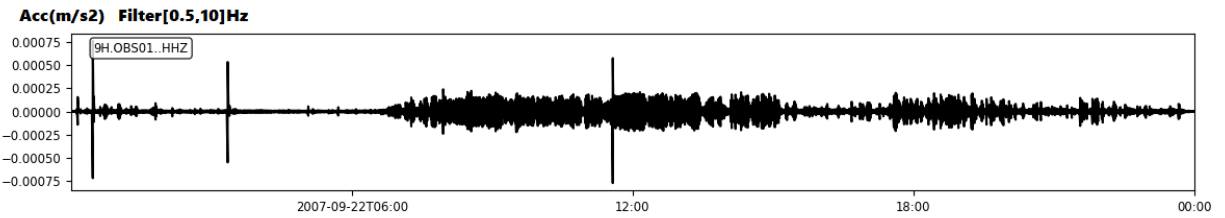

2007-09-22T00:00:00.02 - 2007-09-23T00:00:00.01

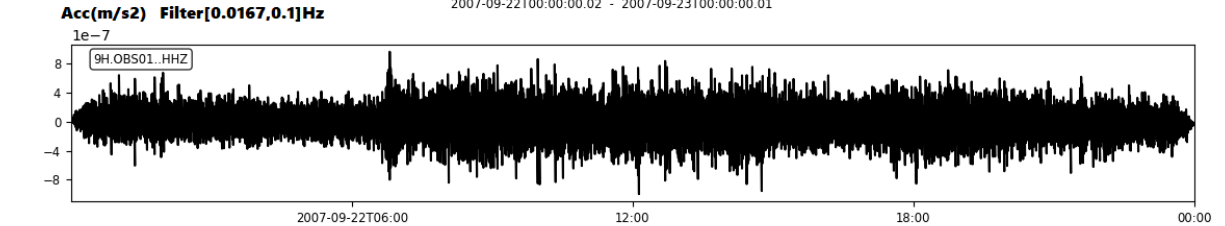

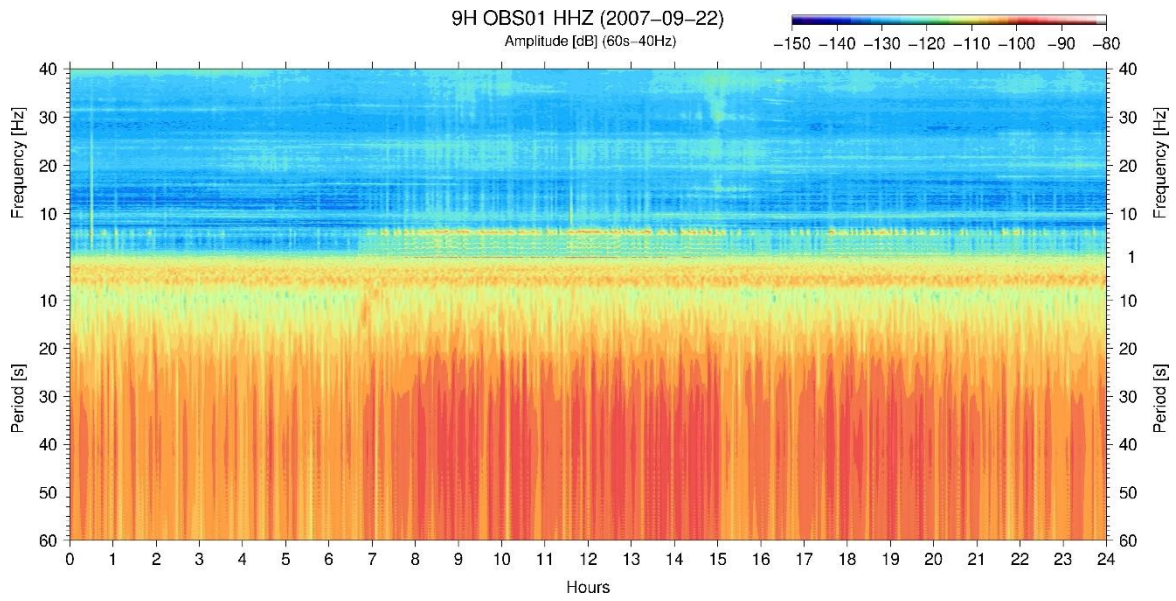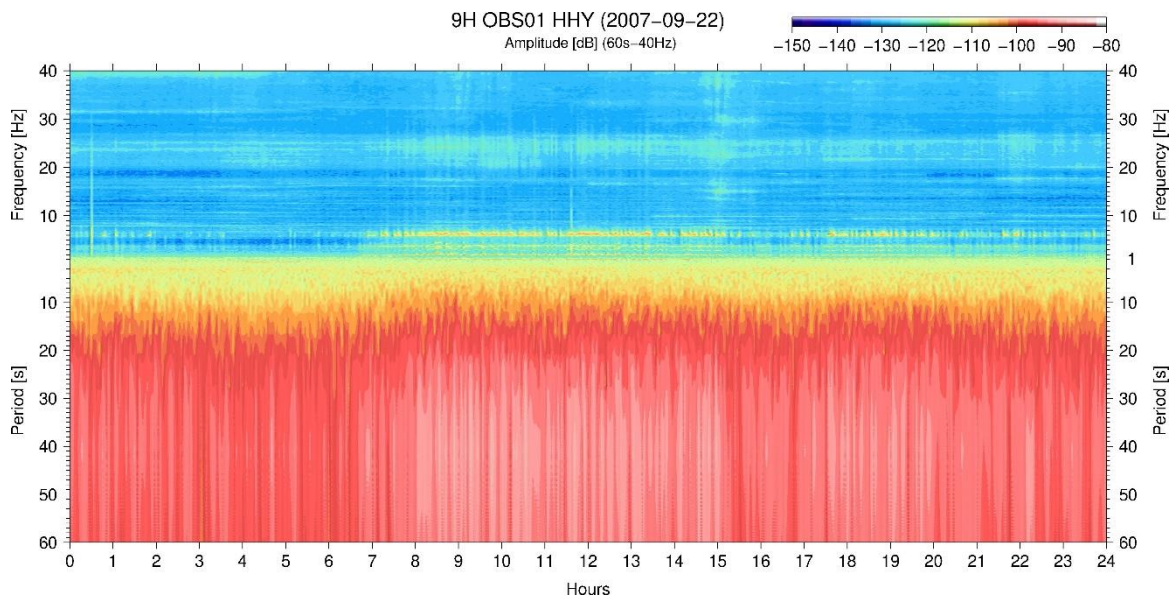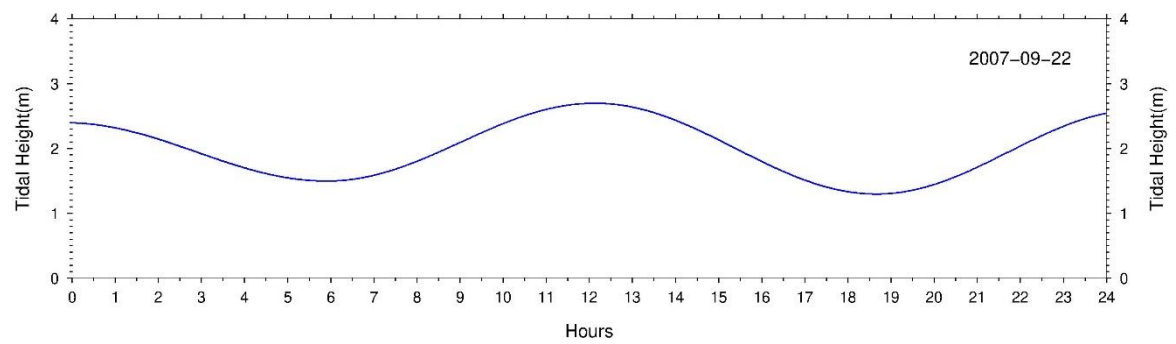

2007-09-22T00:00:00.02 - 2007-09-23T00:00:00.01

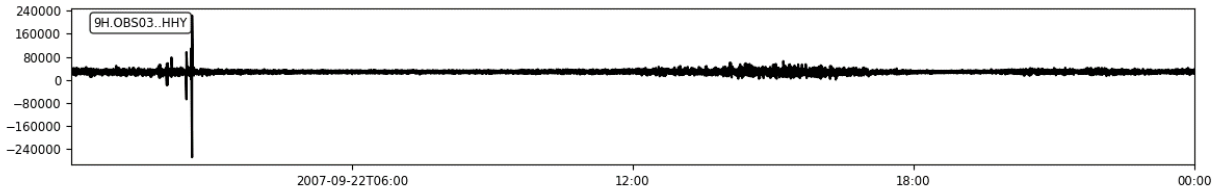

2007-09-22T00:00:00.02 - 2007-09-23T00:00:00.01

**Acc(m/s<sup>2</sup>) Filter[0.5,10]Hz**

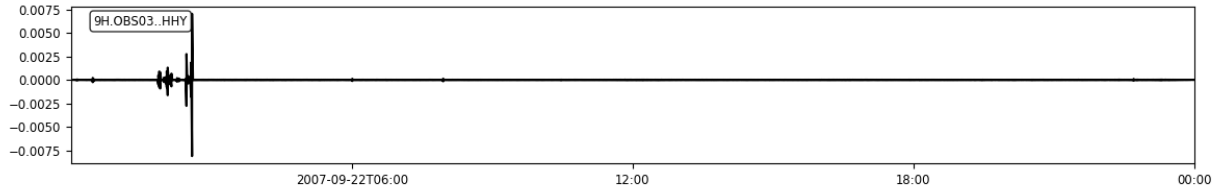

2007-09-22T00:00:00.02 - 2007-09-23T00:00:00.01

**Acc(m/s<sup>2</sup>) Filter[0.0167,0.1]Hz**

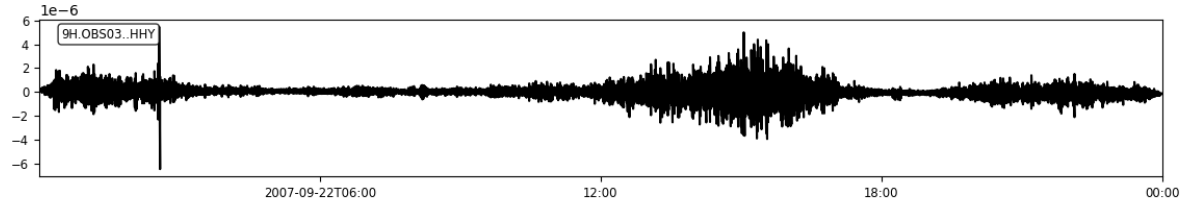

2007-09-22T00:00:00.03 - 2007-09-23T00:00:00.02

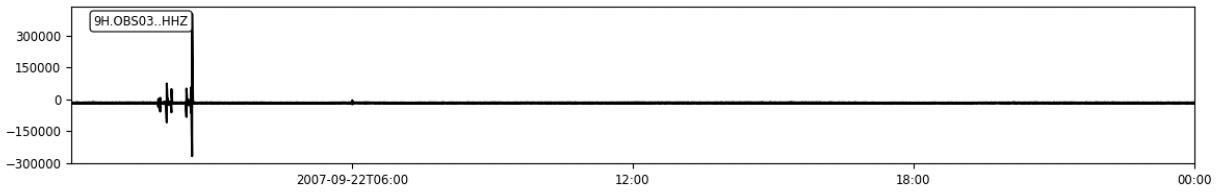

2007-09-22T00:00:00.03 - 2007-09-23T00:00:00.02

**Acc(m/s<sup>2</sup>) Filter[0.5,10]Hz**

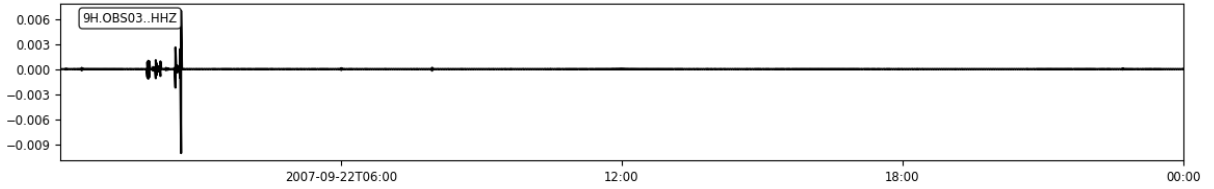

2007-09-22T00:00:00.03 - 2007-09-23T00:00:00.02

**Acc(m/s<sup>2</sup>) Filter[0.0167,0.1]Hz**

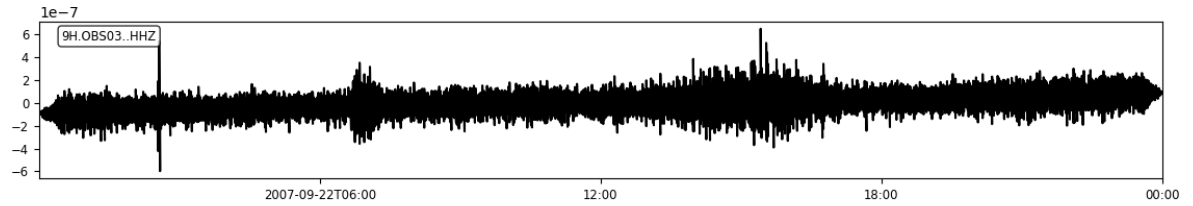

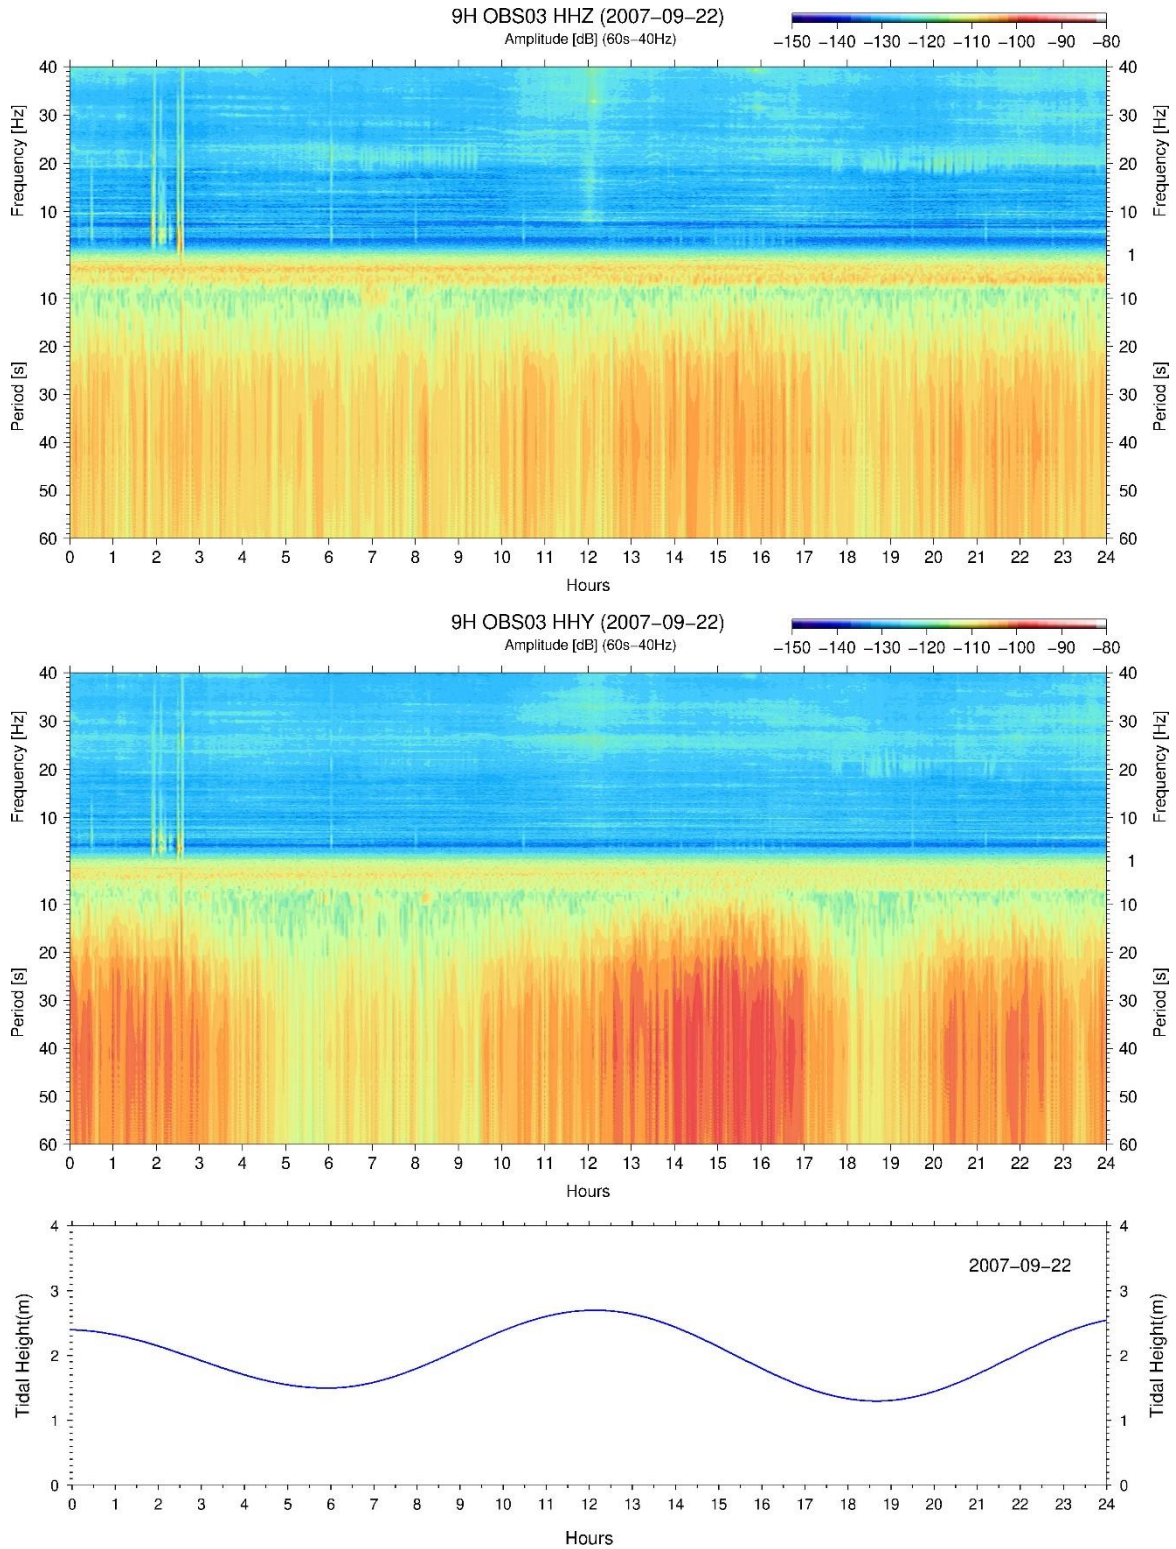

**Figure S13 | OBS01-OBS03 2007-09-22** – Day plot, the raw waveform in counts of the vertical Z and horizontal Y components, signals corrected for instrument response to show acceleration ( $m/s^2$ ) and filtered in the short and long period band, spectrogram and tidal height of Sines (maximum tidal range of 1.5m), showing the effect of tilt noise (20-60s), harmonic tremor (0.5-6Hz) in OBS01, whale vocalisation (20-24Hz) and short duration events in OBS03.

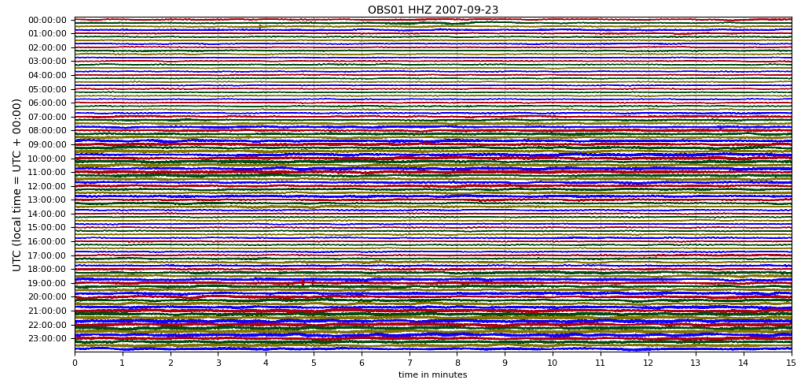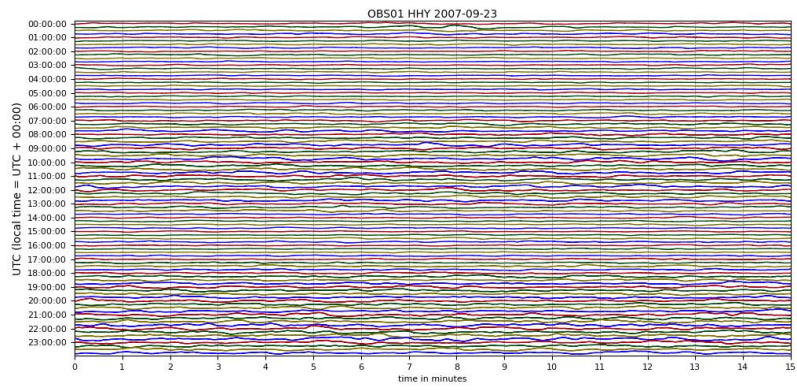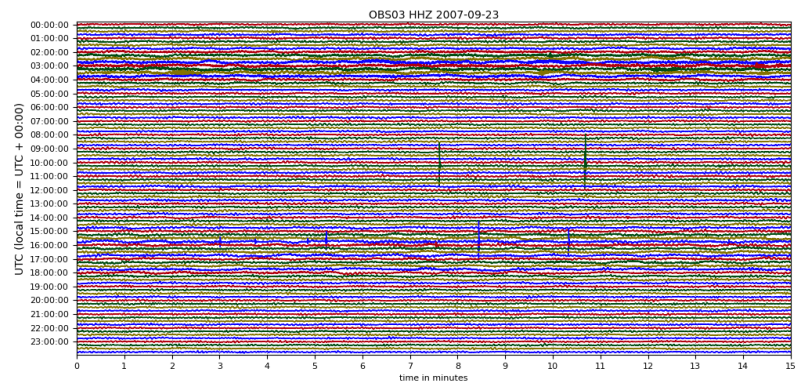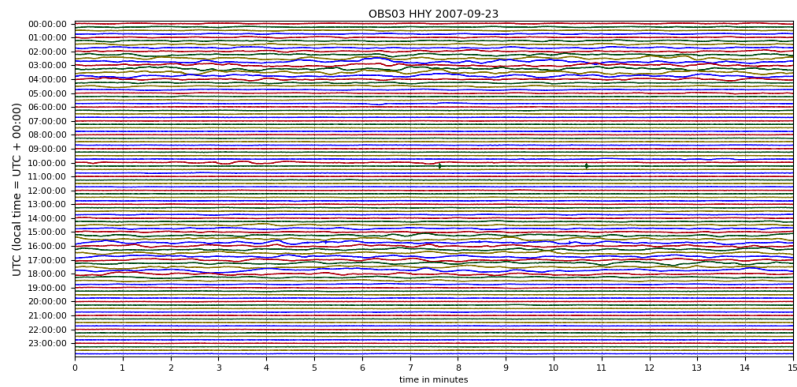

2007-09-23T00:00:00 - 2007-09-24T00:00:00.01

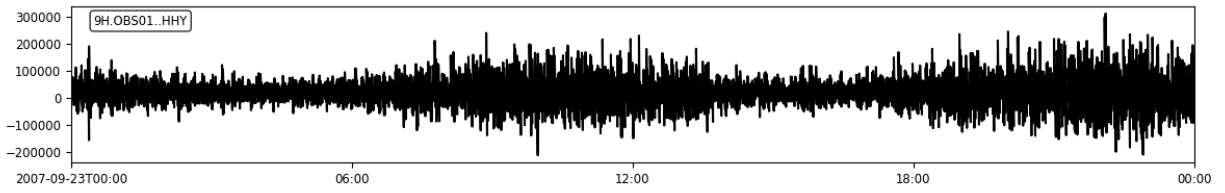

2007-09-23T00:00:00 - 2007-09-24T00:00:00.01

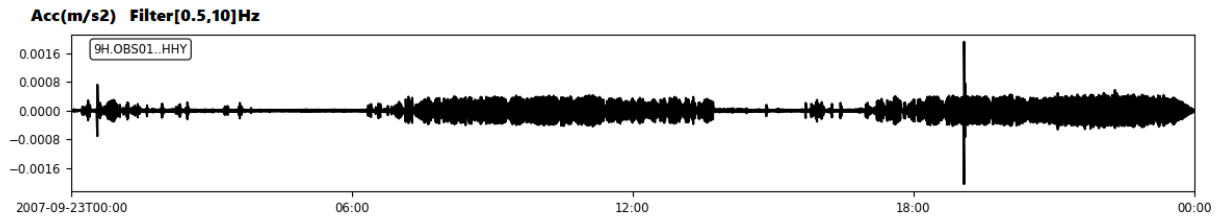

2007-09-23T00:00:00 - 2007-09-24T00:00:00.01

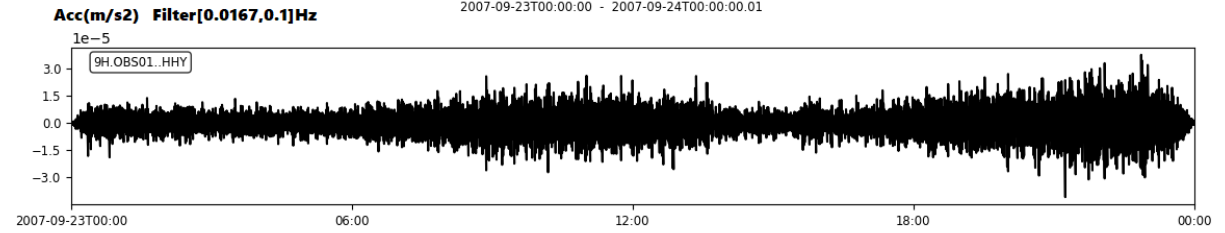

2007-09-23T00:00:00.02 - 2007-09-24T00:00:00.01

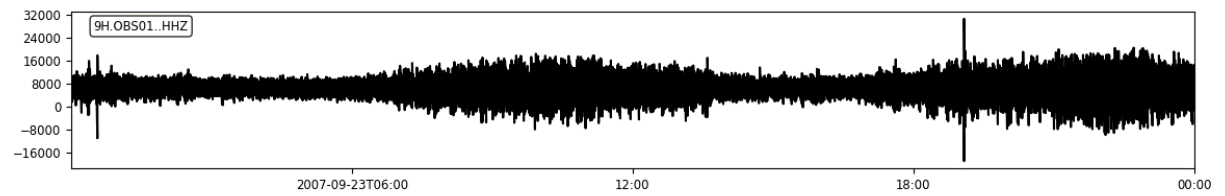

2007-09-23T00:00:00.02 - 2007-09-24T00:00:00.01

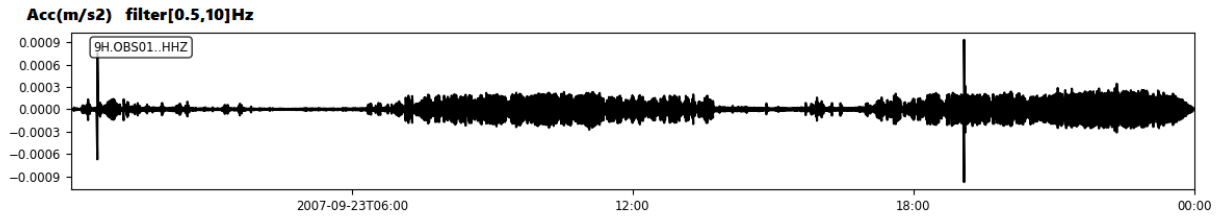

2007-09-23T00:00:00.02 - 2007-09-24T00:00:00.01

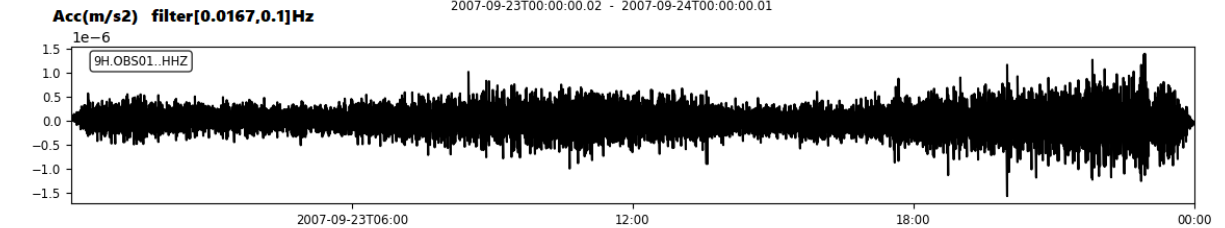

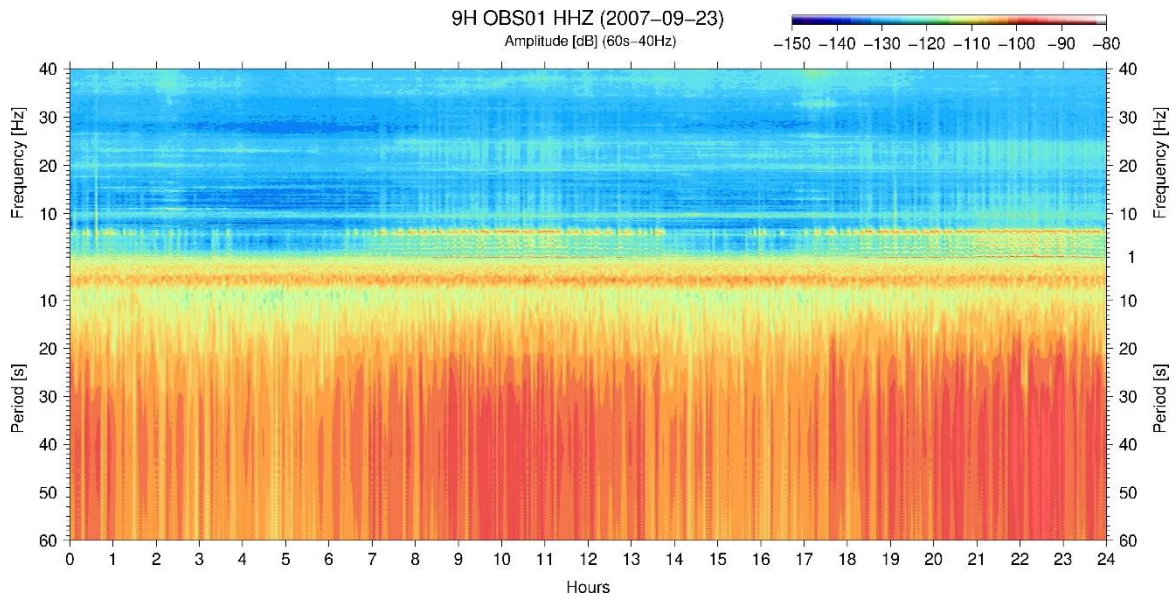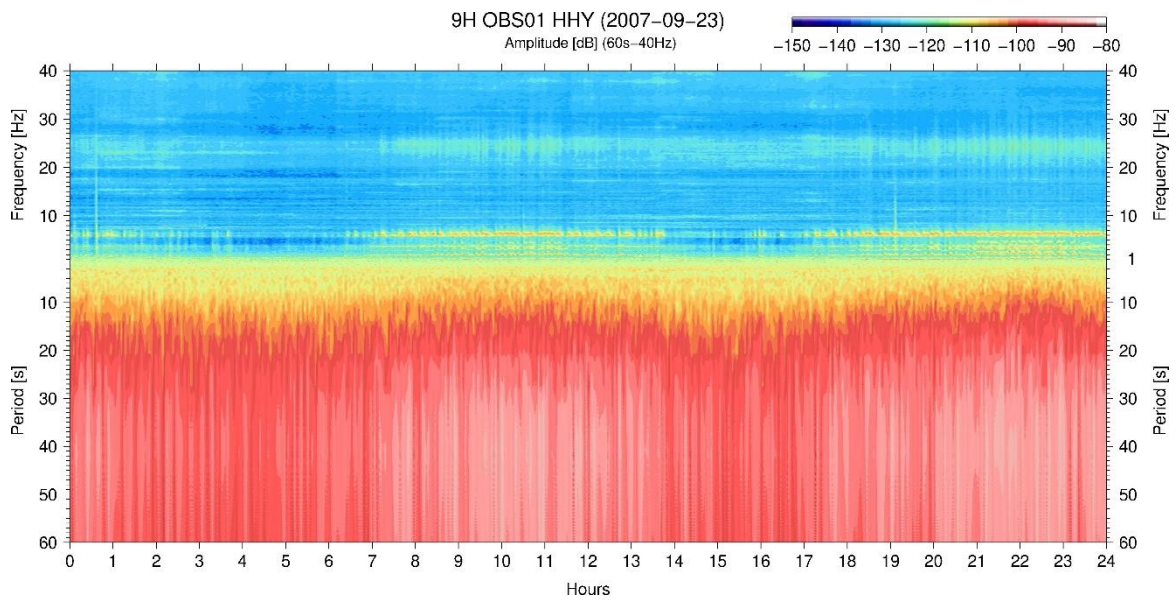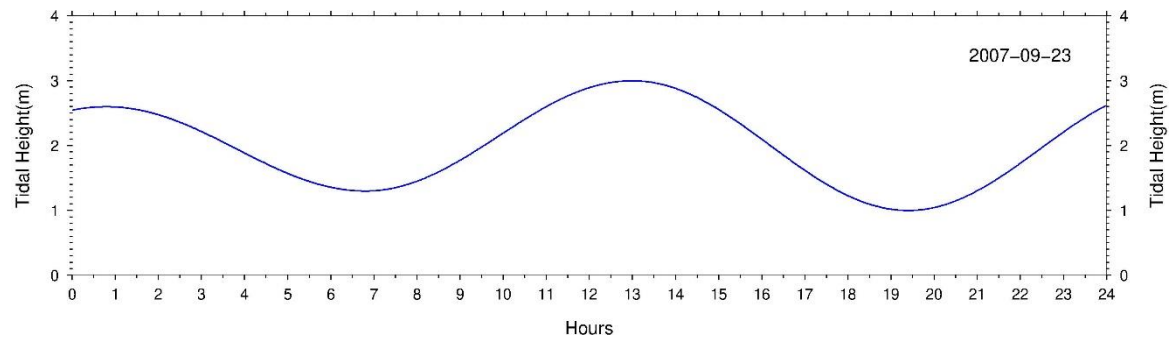



2007-09-23T00:00:00.02 - 2007-09-24T00:00:00.01

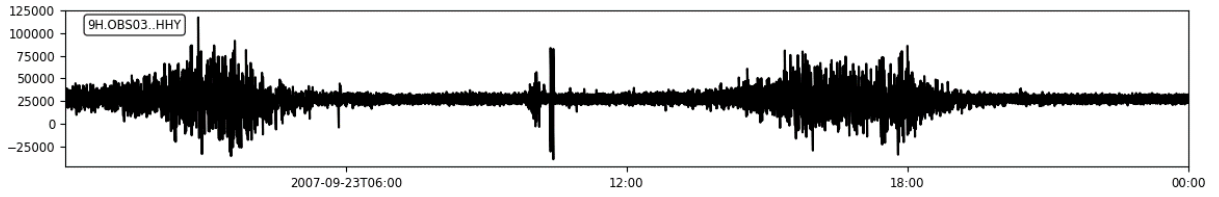

2007-09-23T00:00:00.02 - 2007-09-24T00:00:00.01

**Acc(m/s<sup>2</sup>) Filter[0.5,10]Hz**

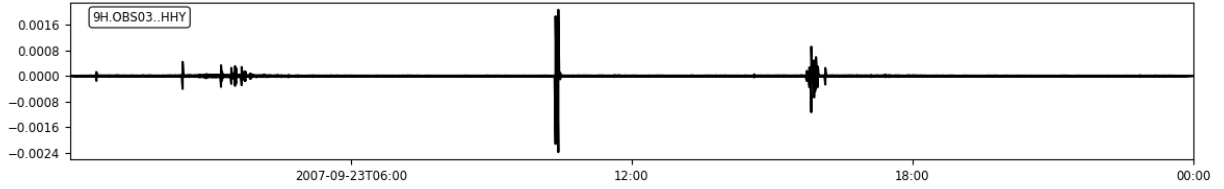

2007-09-23T00:00:00.02 - 2007-09-24T00:00:00.01

**Acc(m/s<sup>2</sup>) Filter[0.0167,0.1]Hz**

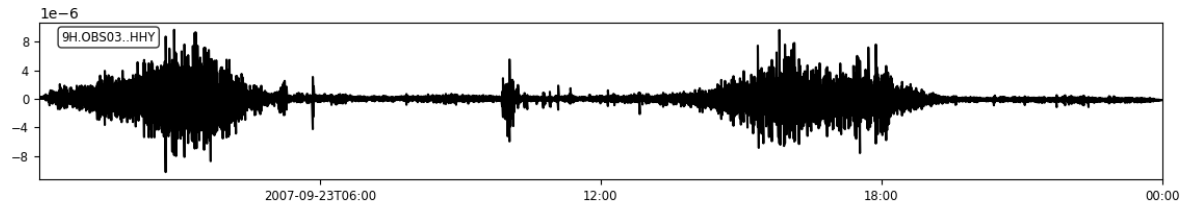

2007-09-23T00:00:00.03 - 2007-09-24T00:00:00.02

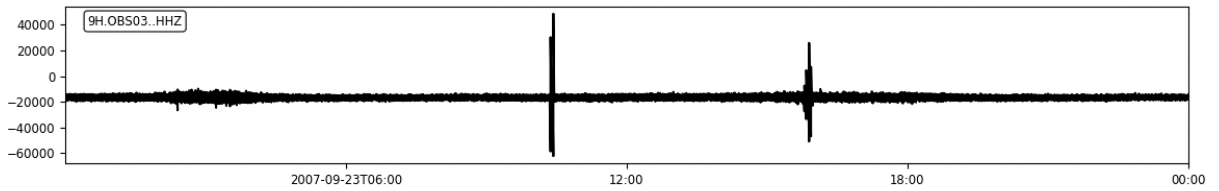

2007-09-23T00:00:00.03 - 2007-09-24T00:00:00.02

**Acc(m/s<sup>2</sup>) Filter[0.5,10]Hz**

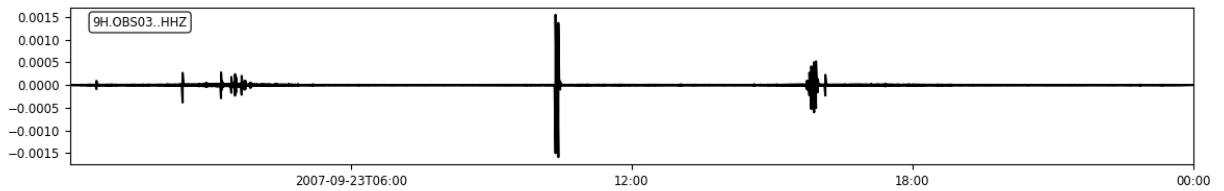

2007-09-23T00:00:00.03 - 2007-09-24T00:00:00.02

**Acc(m/s<sup>2</sup>) Filter[0.0167,0.1]Hz**

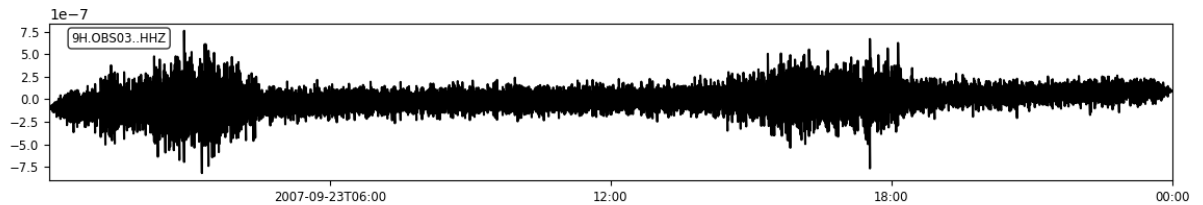

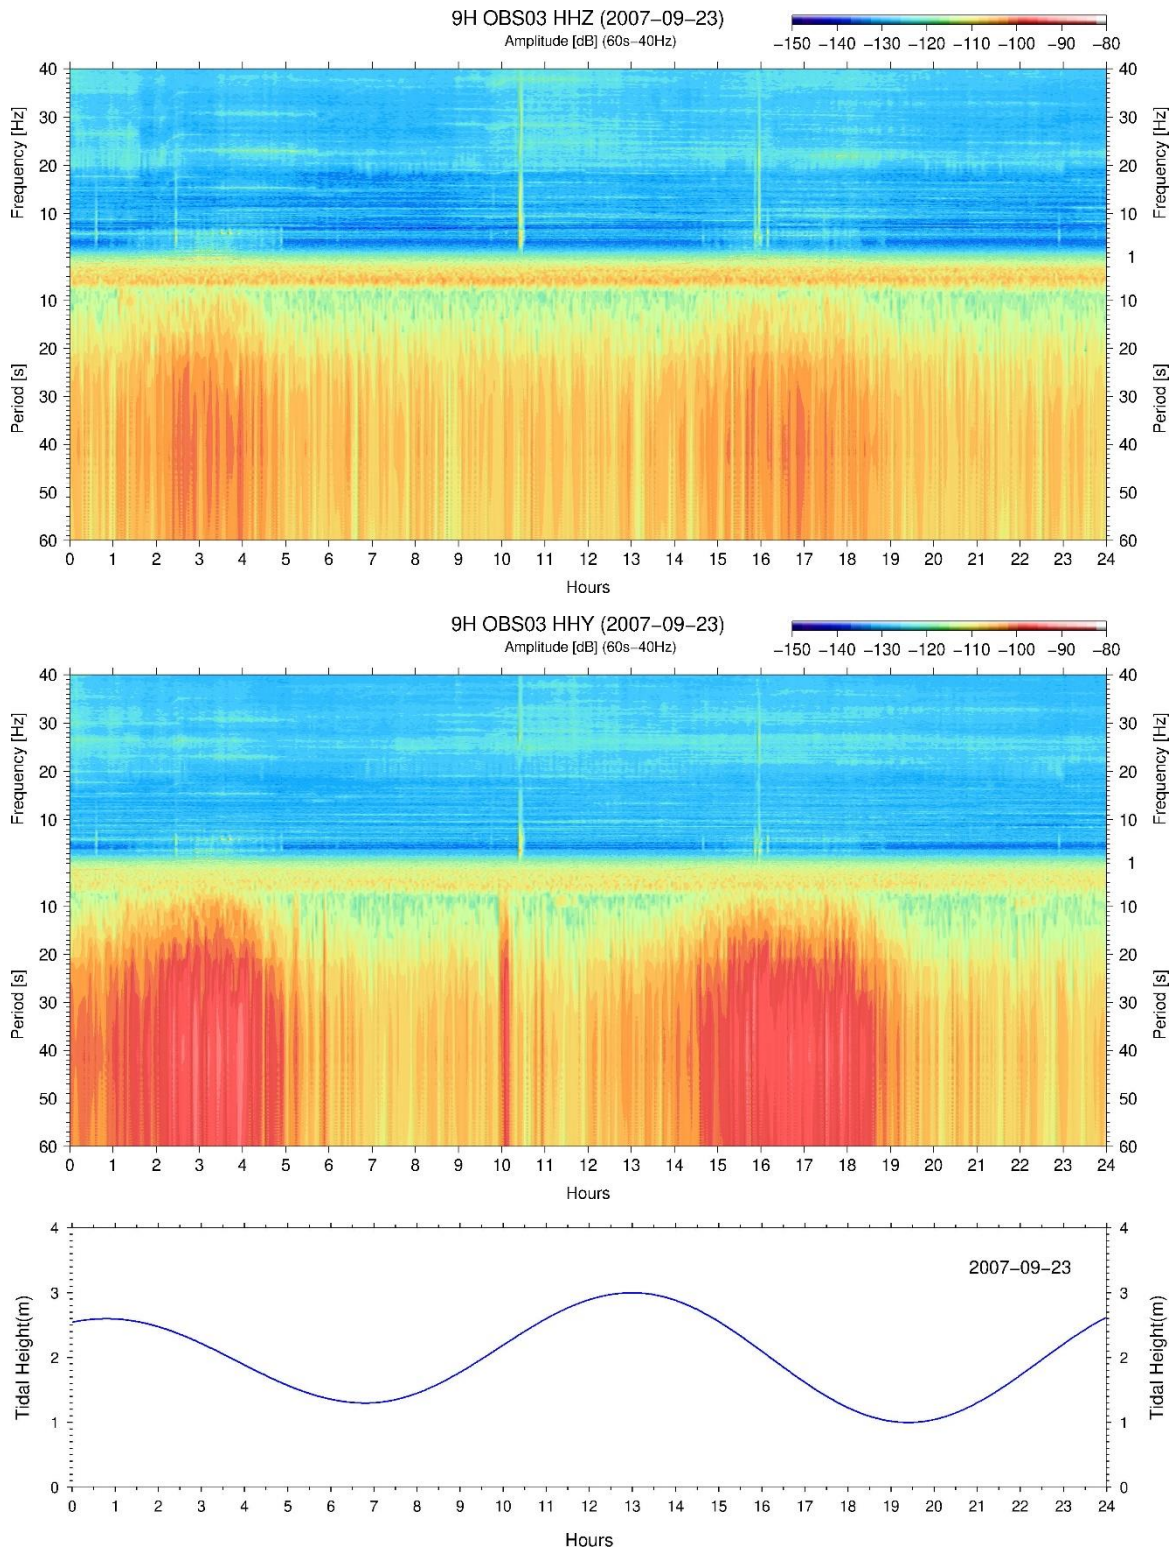

**Figure S14 | OBS01-OBS03 2007-09-23** – Day plot, the raw waveform in counts of the vertical Z and horizontal Y components, signals corrected for instrument response to show acceleration ( $m/s^2$ ) and filtered in the short and long period band, spectrogram and tidal height of Sines (maximum tidal range of 1.5m), showing the effect of tilt noise (20-60s), harmonic tremor (0.5-6Hz) in OBS01 and short duration events and whale vocalisation (20-24Hz) in OBS03.

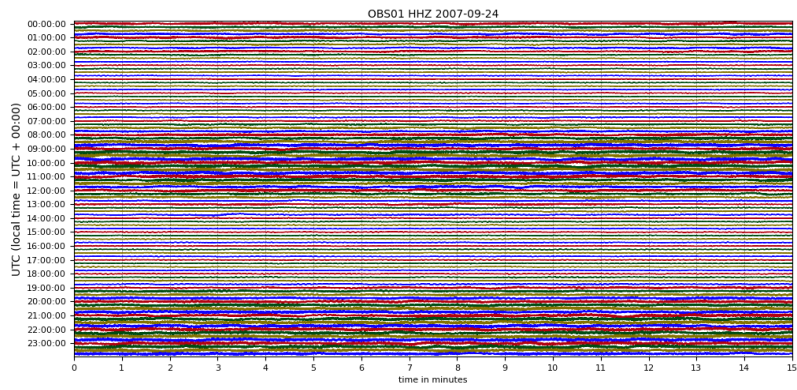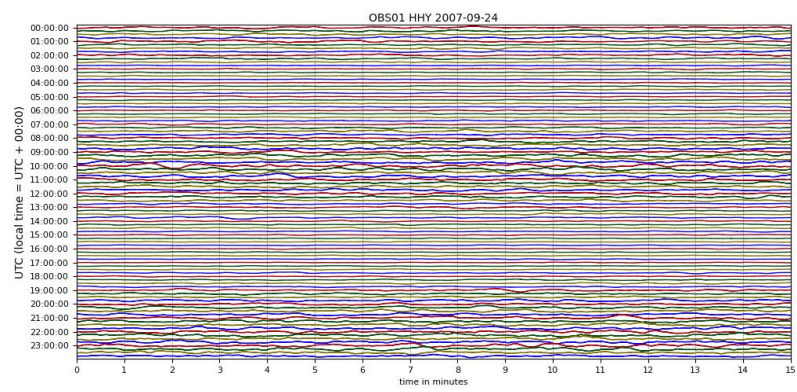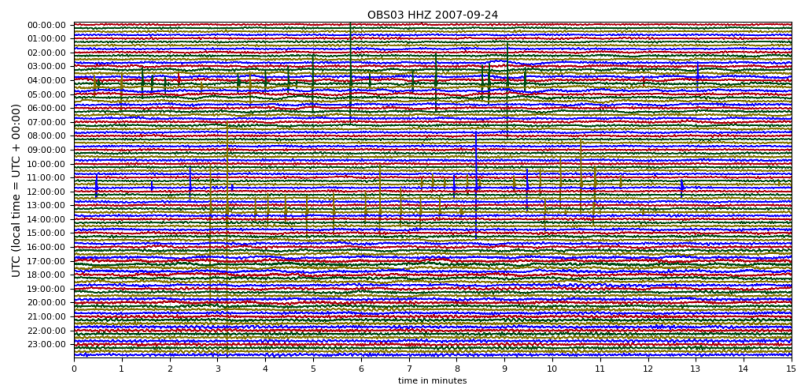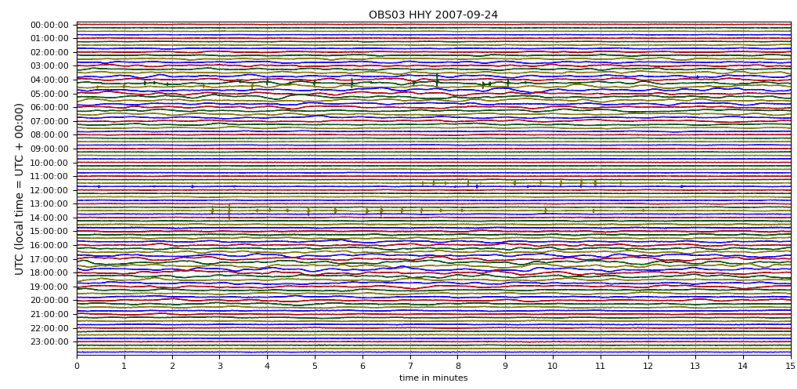

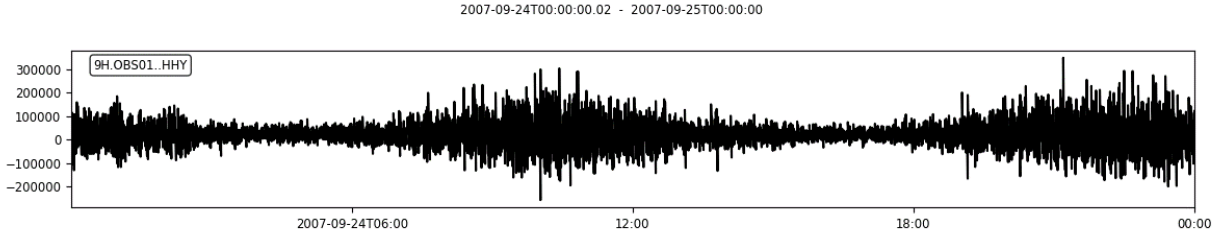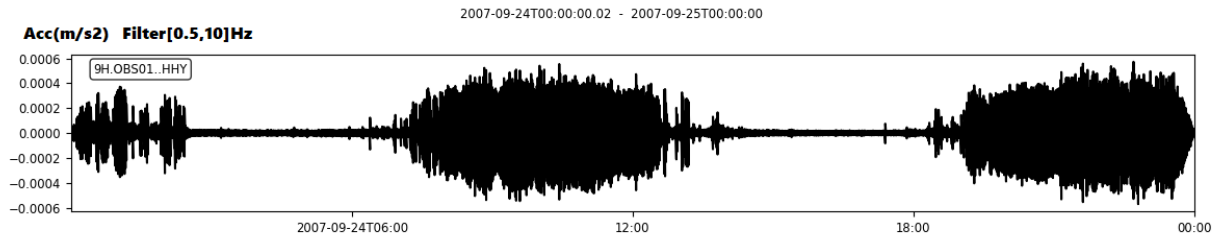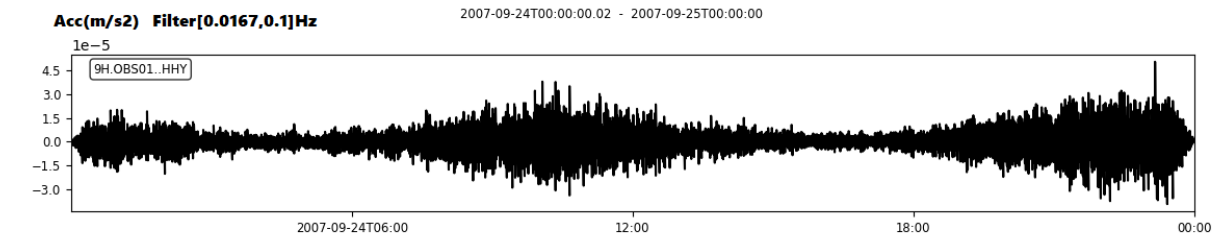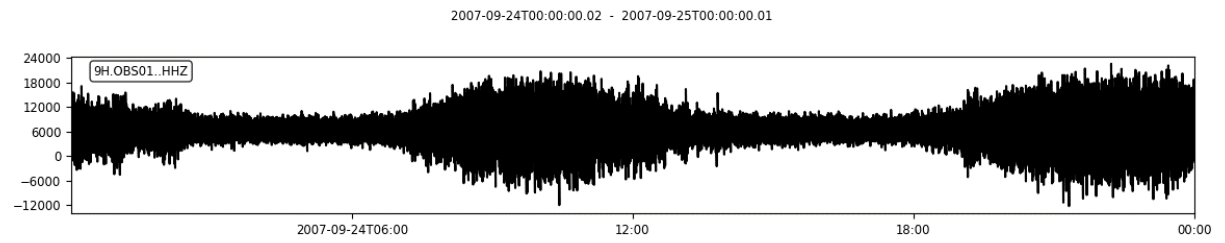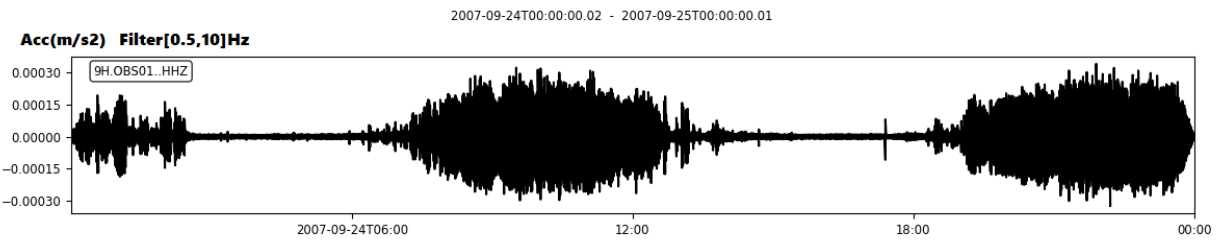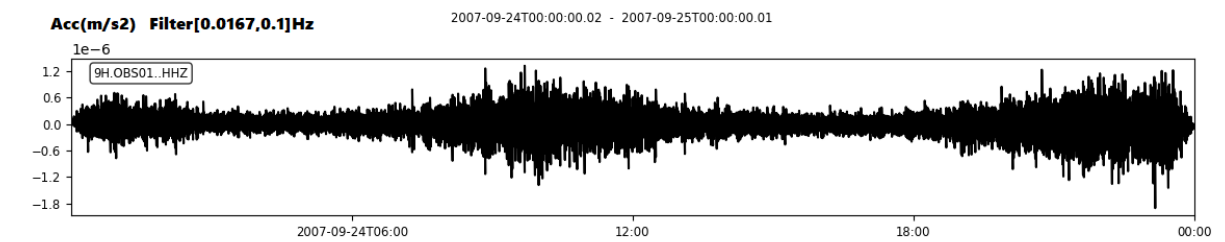

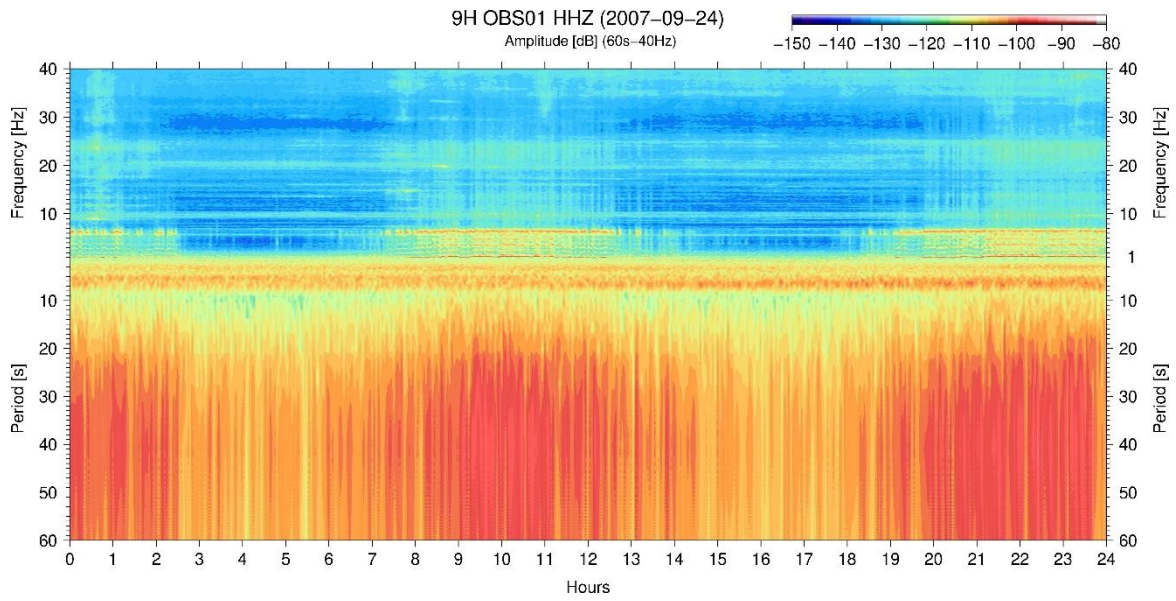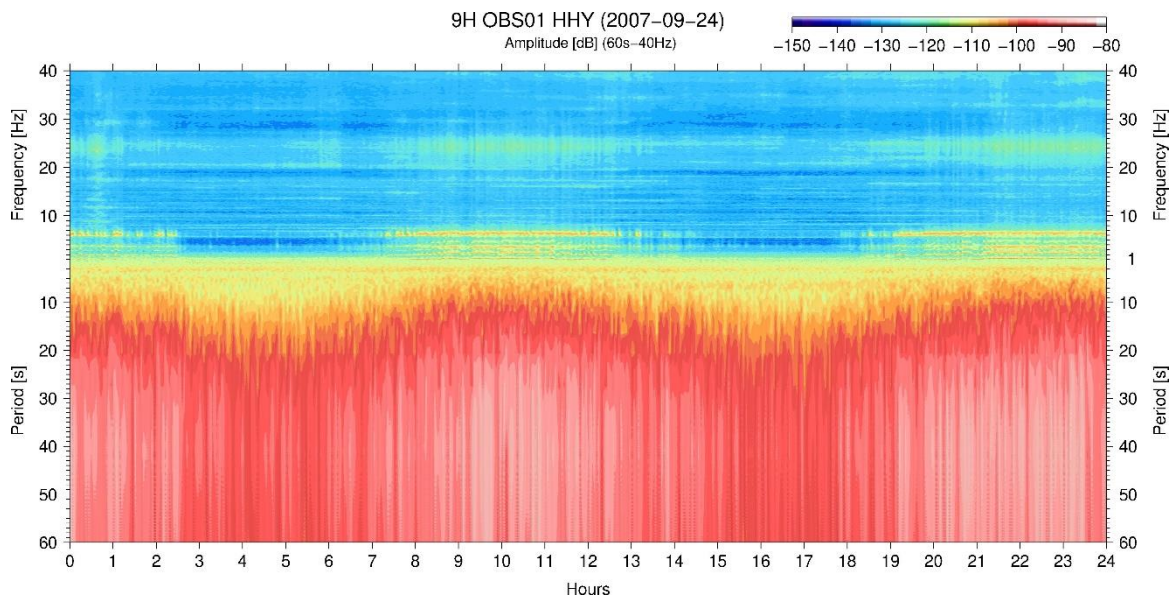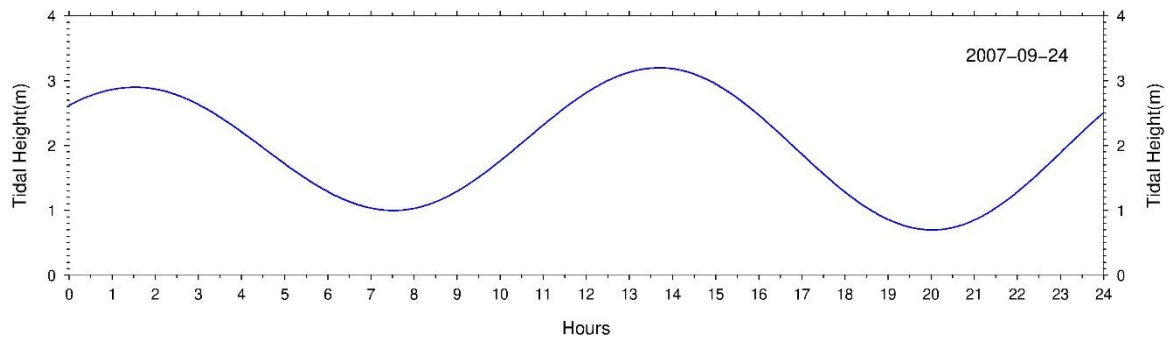

2007-09-24T00:00:00.02 - 2007-09-25T00:00:00.02

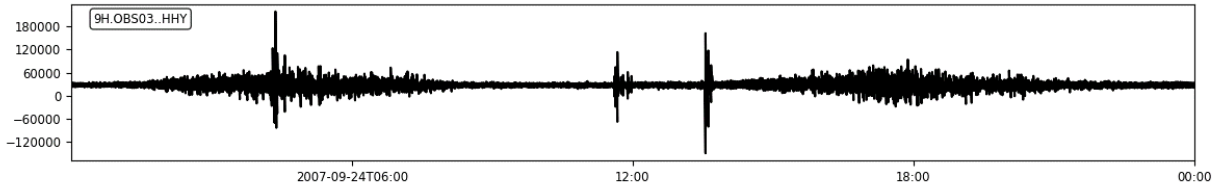

**Acc(m/s<sup>2</sup>) Filter[0.5,10]Hz**

2007-09-24T00:00:00.02 - 2007-09-25T00:00:00.02

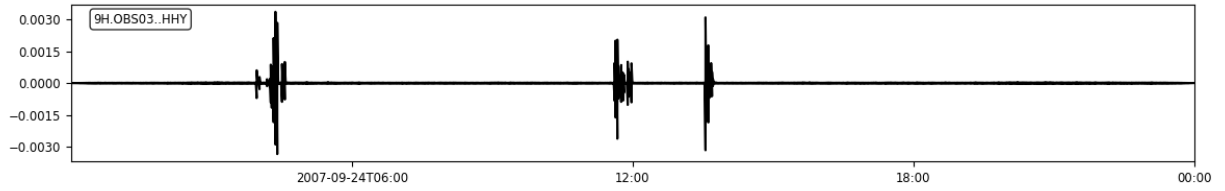

**Acc(m/s<sup>2</sup>) Filter[0.0167,0.1]Hz**

2007-09-24T00:00:00.02 - 2007-09-25T00:00:00.02

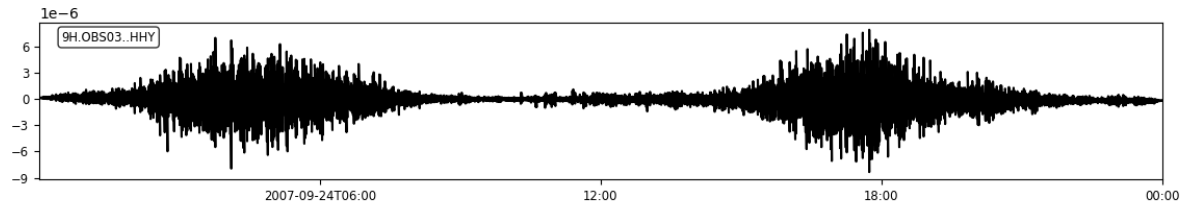

2007-09-24T00:00:00.03 - 2007-09-25T00:00:00.01

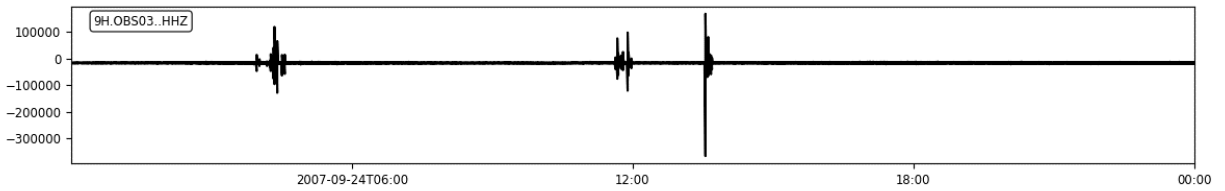

**Acc(m/s<sup>2</sup>) Filter[0.5,10]Hz**

2007-09-24T00:00:00.03 - 2007-09-25T00:00:00.01

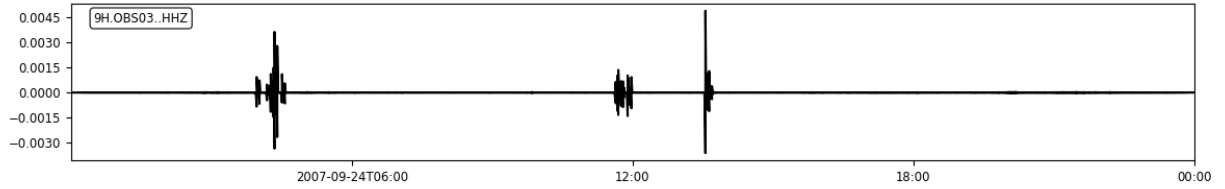

**Acc(m/s<sup>2</sup>) Filter[0.0167,0.1]Hz**

2007-09-24T00:00:00.03 - 2007-09-25T00:00:00.01

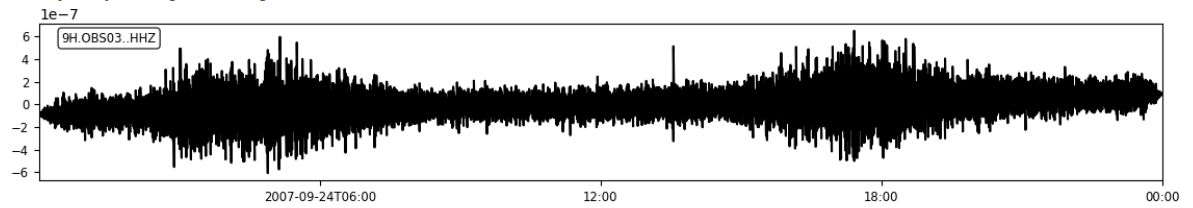

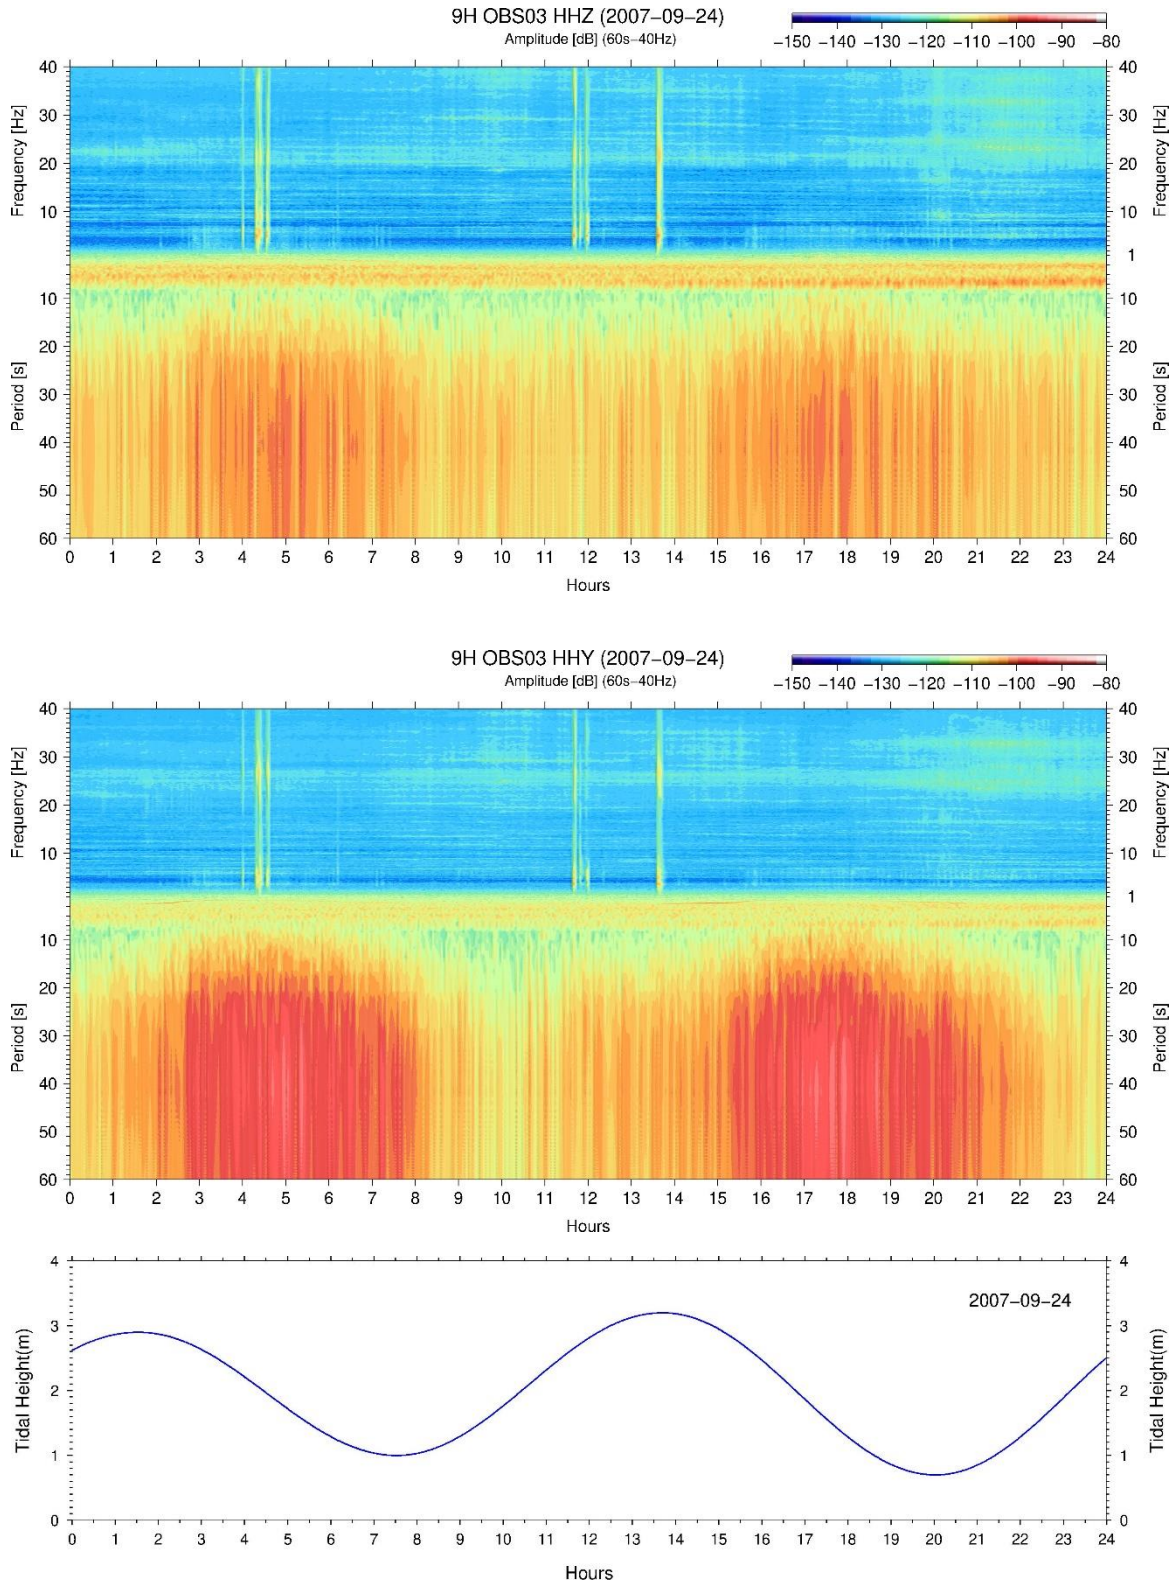

**Figure S15 | OBS01 2007-09-24** – Day plot, the raw waveform in counts of the vertical Z and horizontal Y components, signals corrected for instrument response to show acceleration ( $m/s^2$ ) and filtered in the short and long period band, spectrogram and tidal height of Sines (maximum Tidal range of 2.5m), showing the effect of tilt noise (20-60s), harmonic tremor (0.5-6Hz) in OBS01, short duration events (OBS03) and secondary microseisms (6-7s).

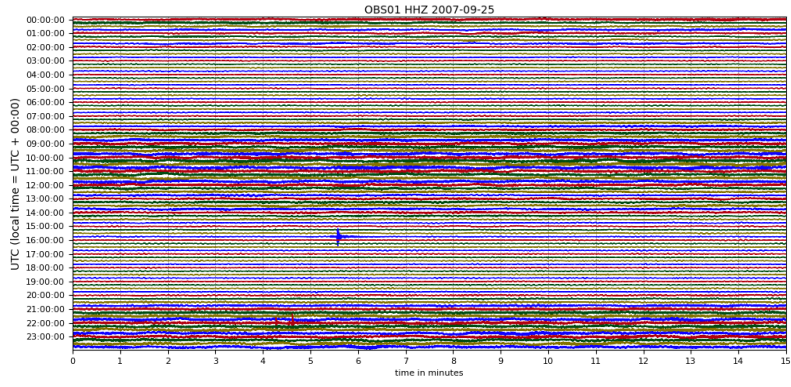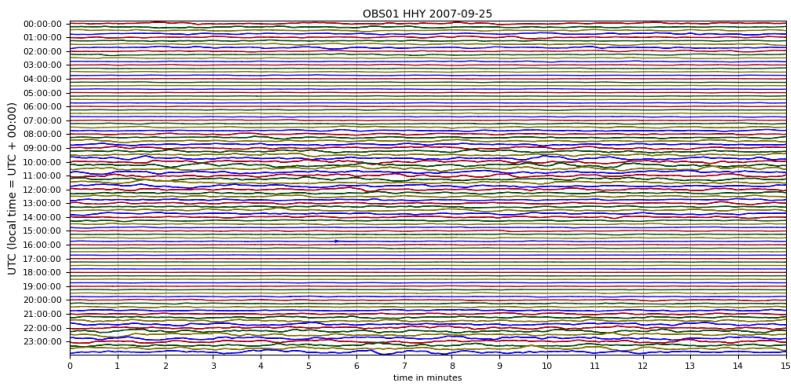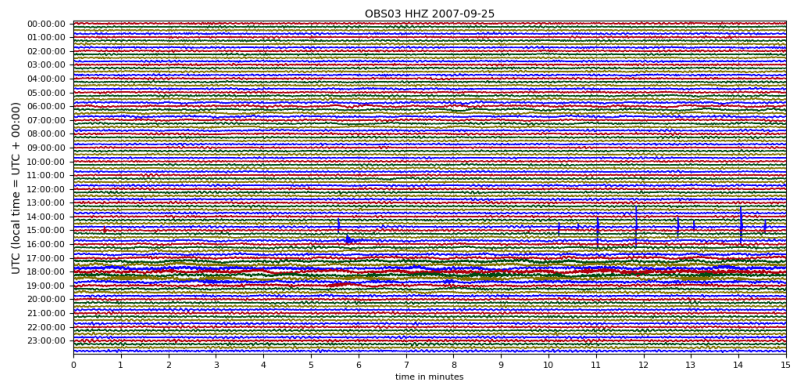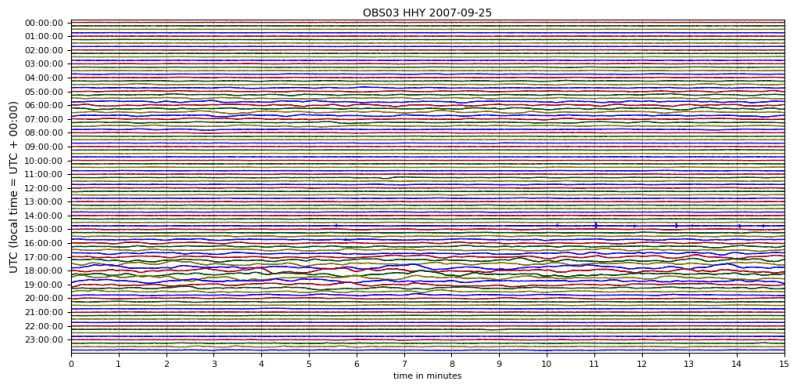



2007-09-25T00:00:00.01 - 2007-09-26T00:00:00.01

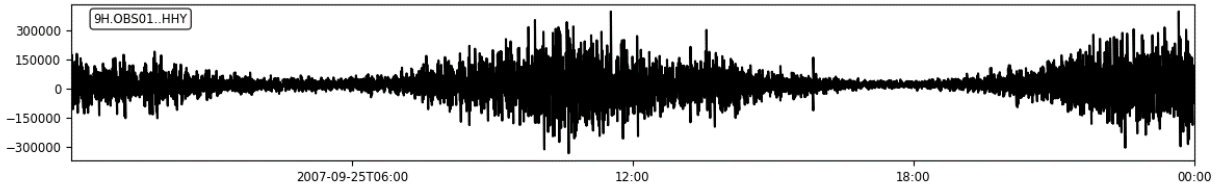

2007-09-25T00:00:00.01 - 2007-09-26T00:00:00.01

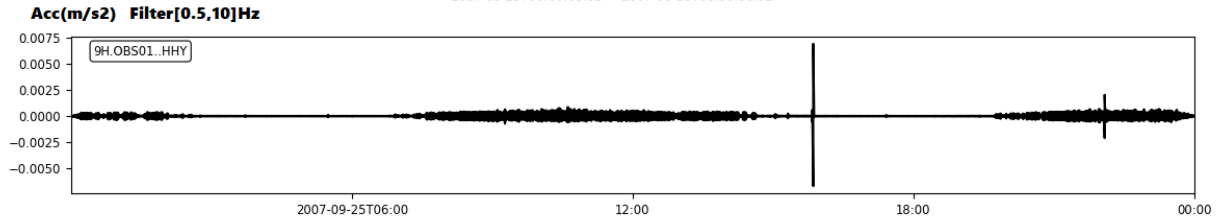

2007-09-25T00:00:00.01 - 2007-09-26T00:00:00.01

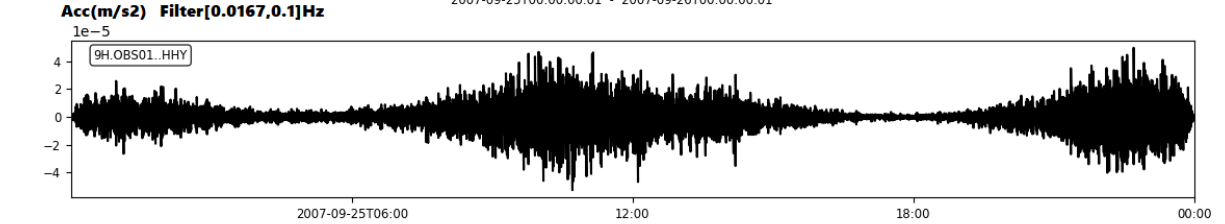

2007-09-25T00:00:00.02 - 2007-09-26T00:00:00.02

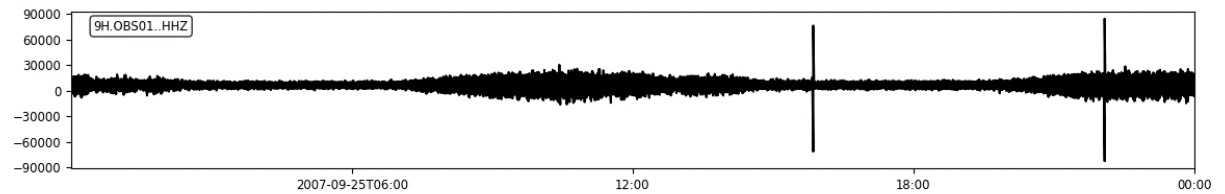

2007-09-25T00:00:00.02 - 2007-09-26T00:00:00.02

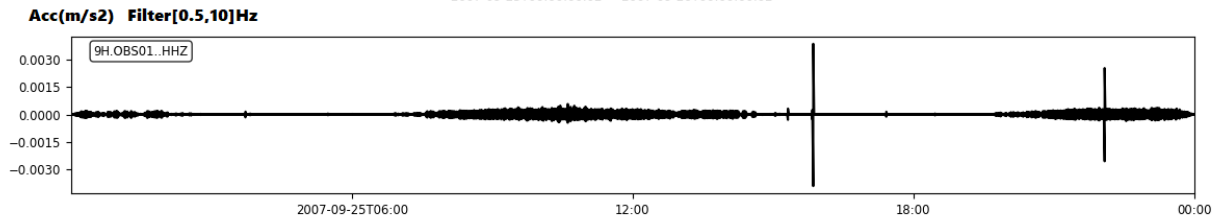

2007-09-25T00:00:00.02 - 2007-09-26T00:00:00.02

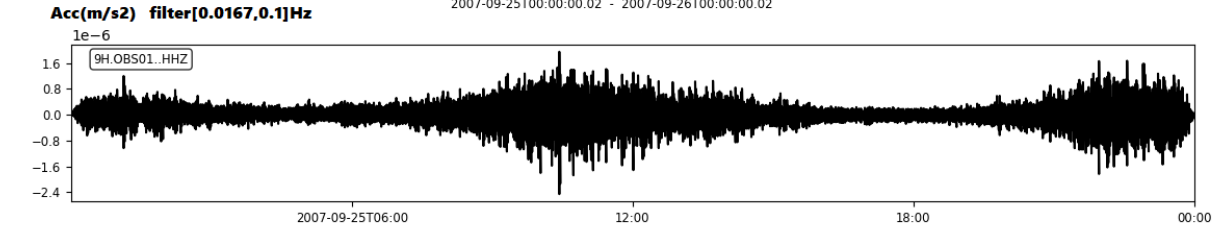

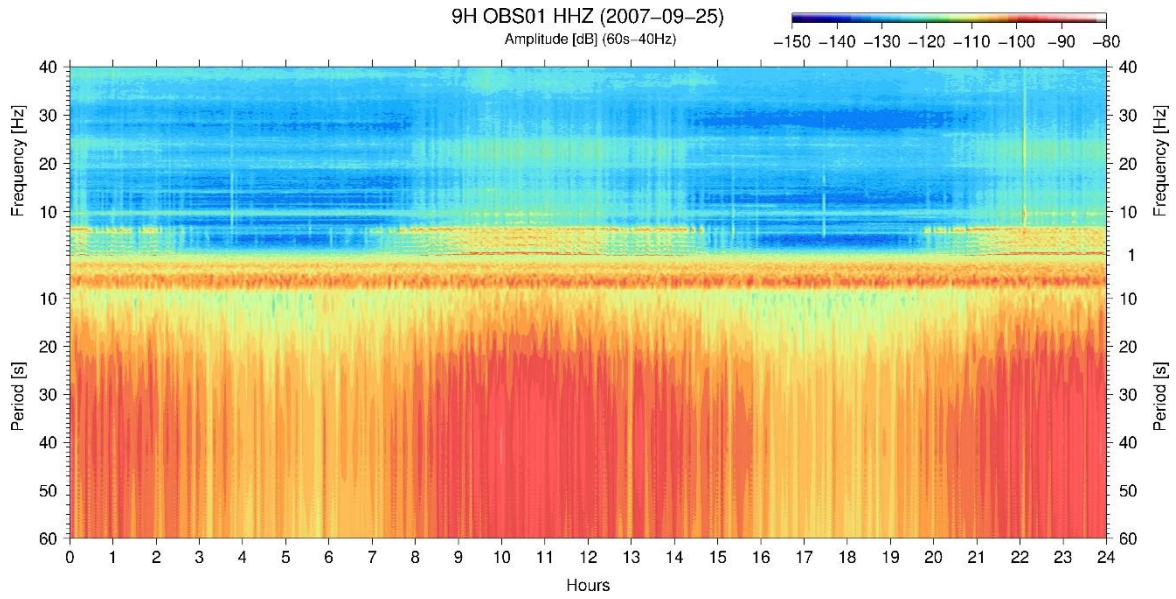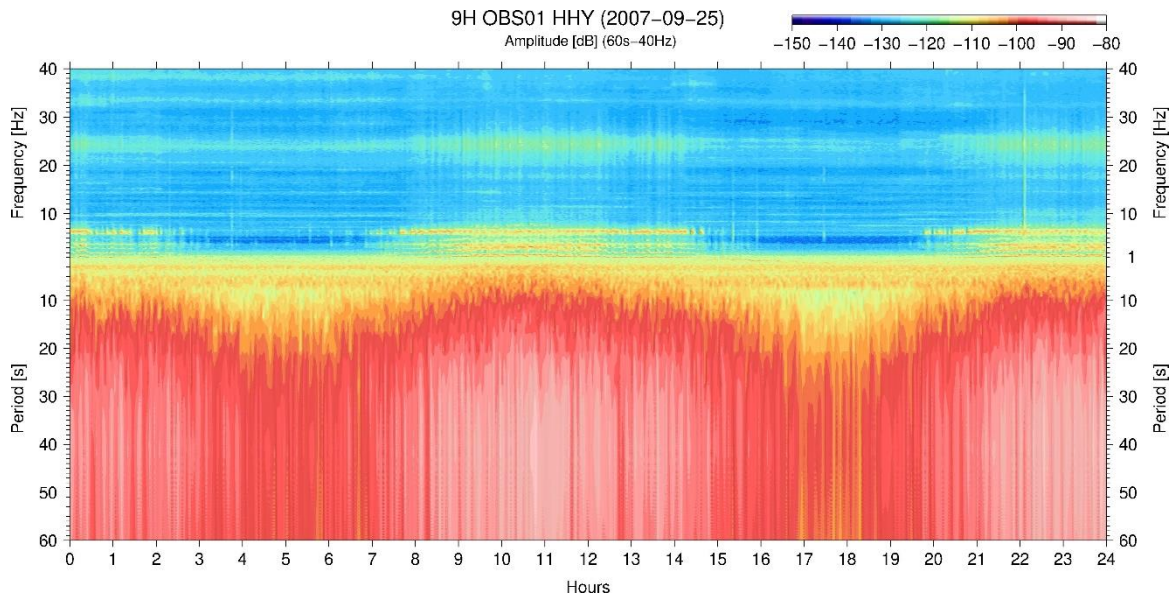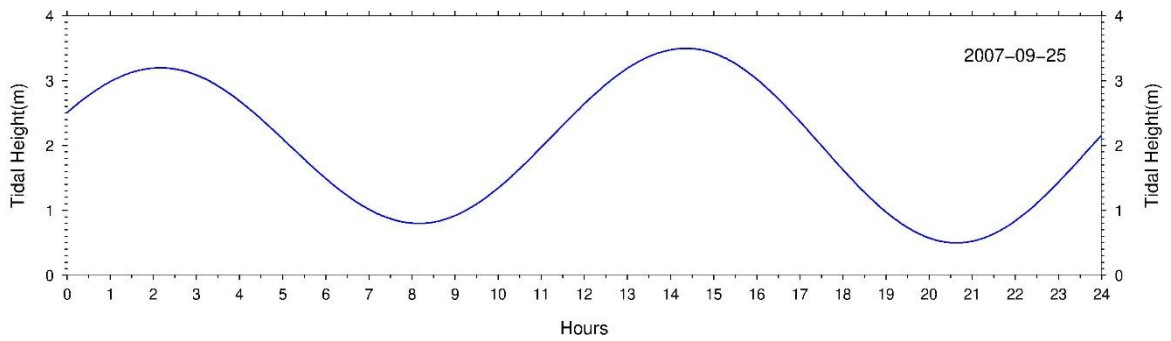

2007-09-25T00:00:00.03 - 2007-09-26T00:00:00.01

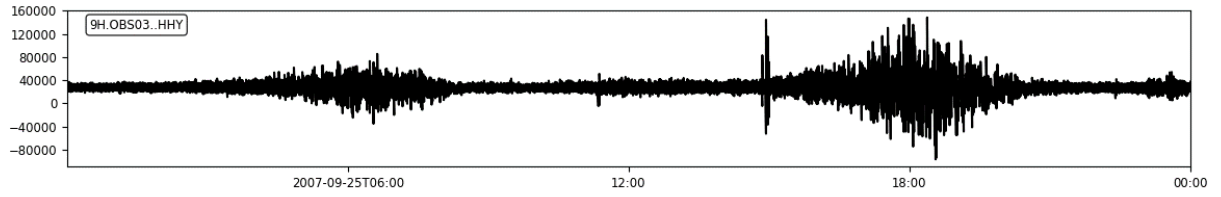

2007-09-25T00:00:00.03 - 2007-09-26T00:00:00.01

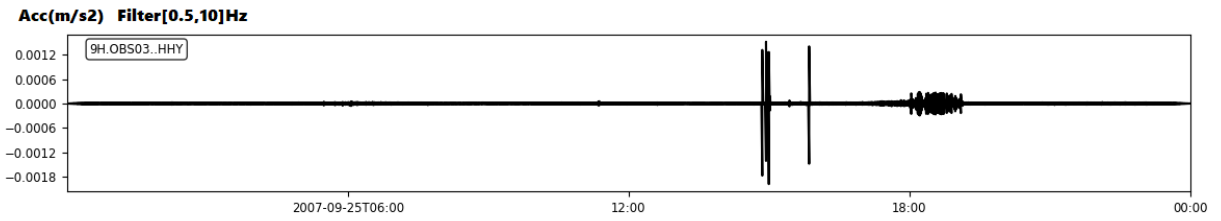

2007-09-25T00:00:00.03 - 2007-09-26T00:00:00.01

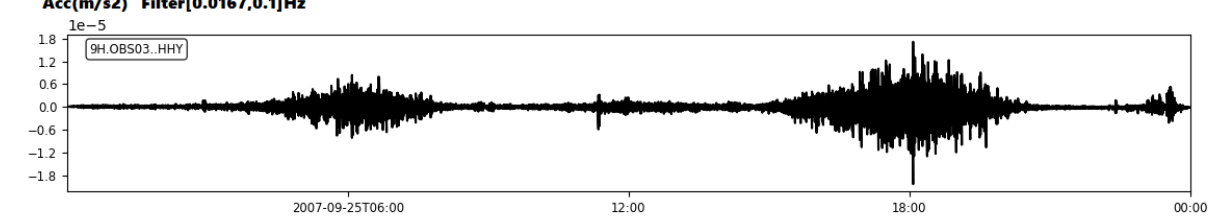

2007-09-25T00:00:00.02 - 2007-09-26T00:00:00.01

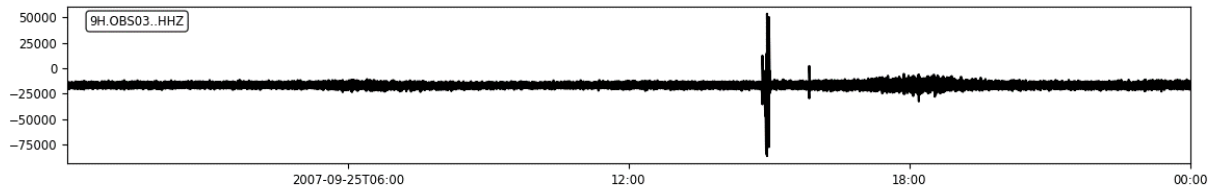

2007-09-25T00:00:00.02 - 2007-09-26T00:00:00.01

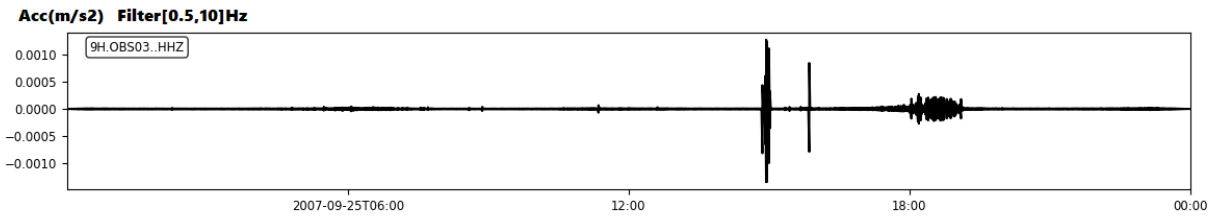

2007-09-25T00:00:00.02 - 2007-09-26T00:00:00.01

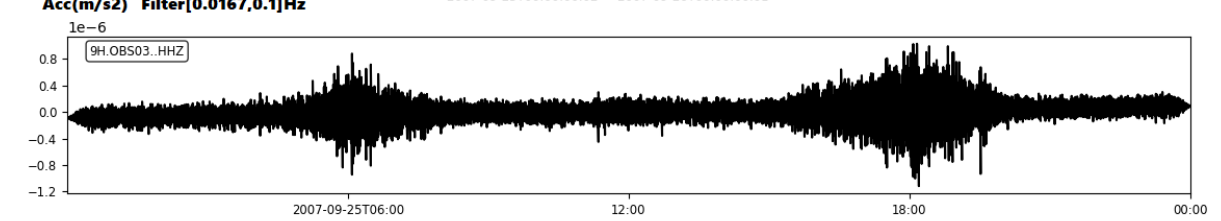

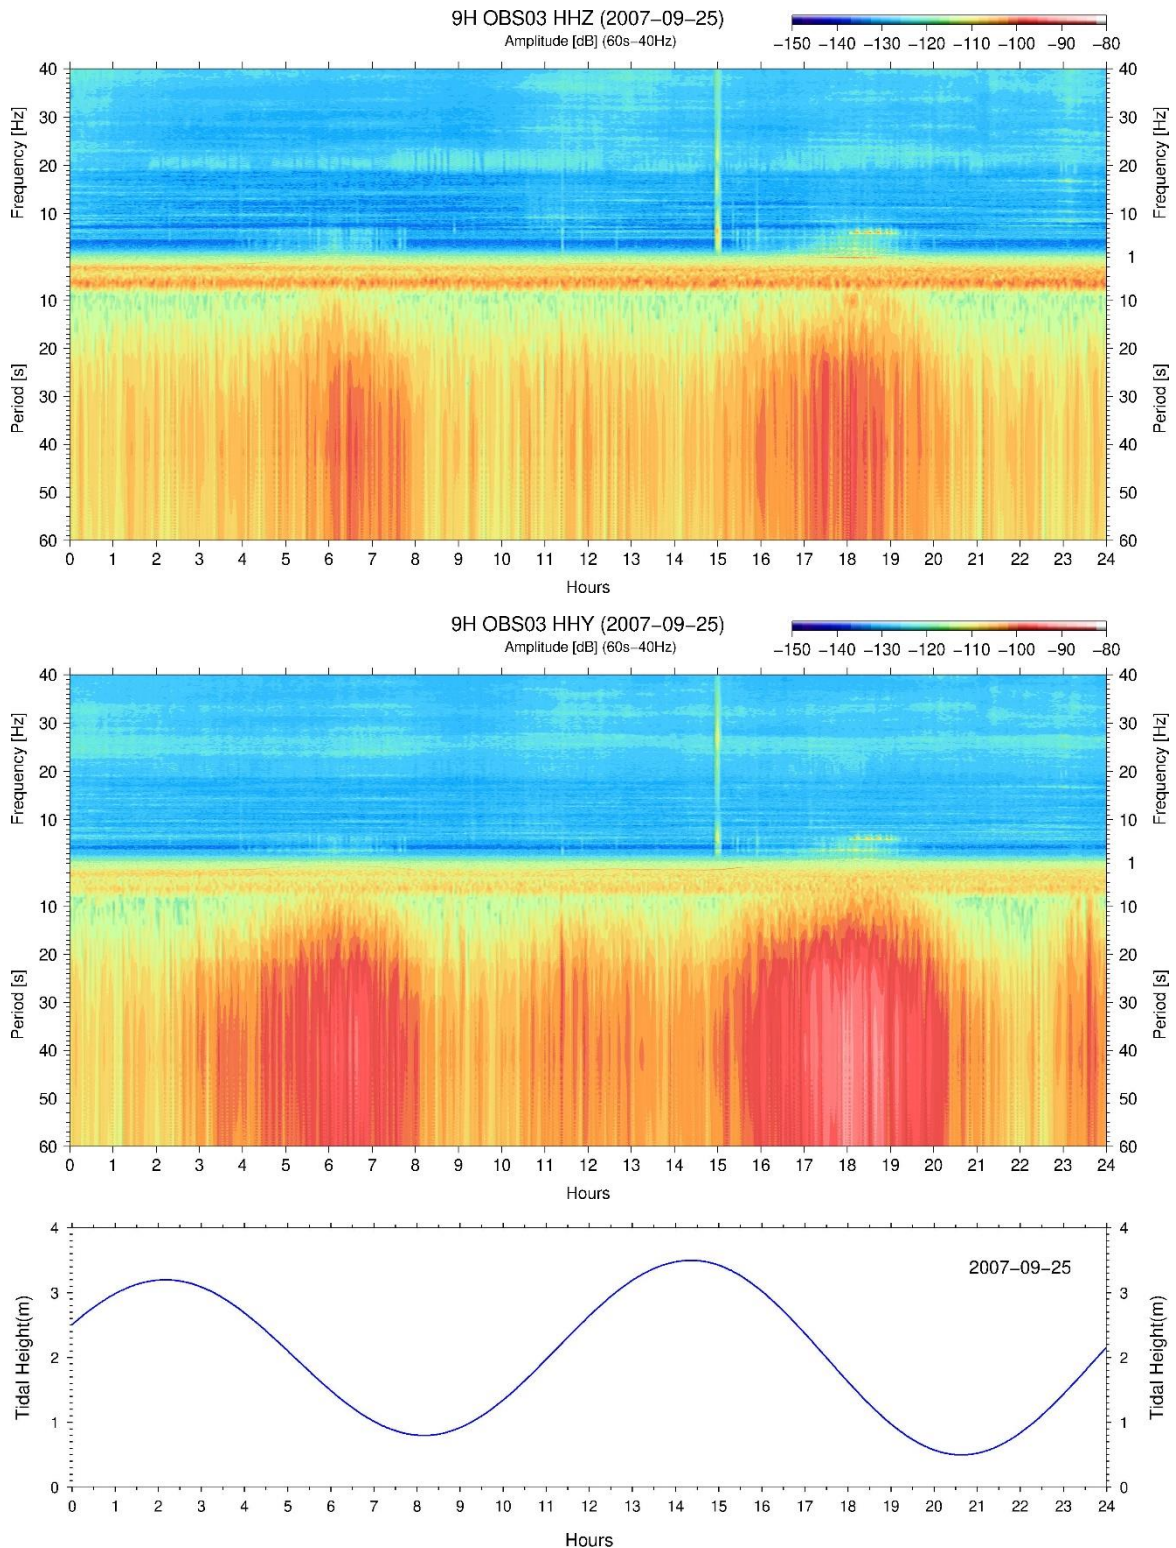

**Figure S16 | OBS01-OBS03 2007-09-25** – Day plot, the raw waveform in counts of the vertical Z and horizontal Y components, signals corrected for instrument response to show acceleration ( $m/s^2$ ) and filtered in the short and long period band, spectrogram and tidal height in Sines (maximum tidal range of 3.0m), showing one local earthquake, the effect of tilt noise (20-60s), harmonic tremor (0.5-6Hz), short duration events and whales vocalization (20-24Hz) in OBS03.

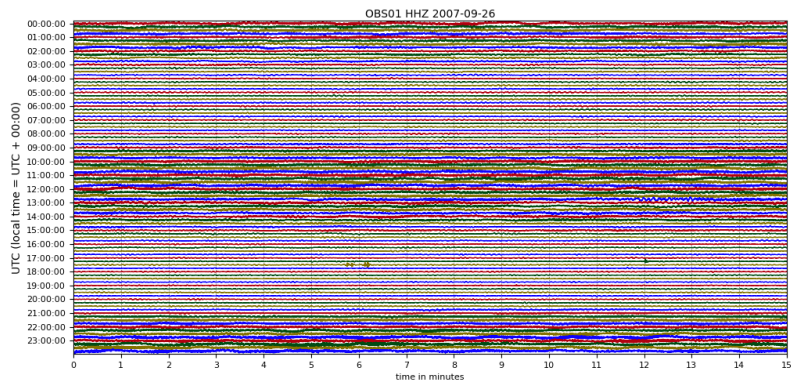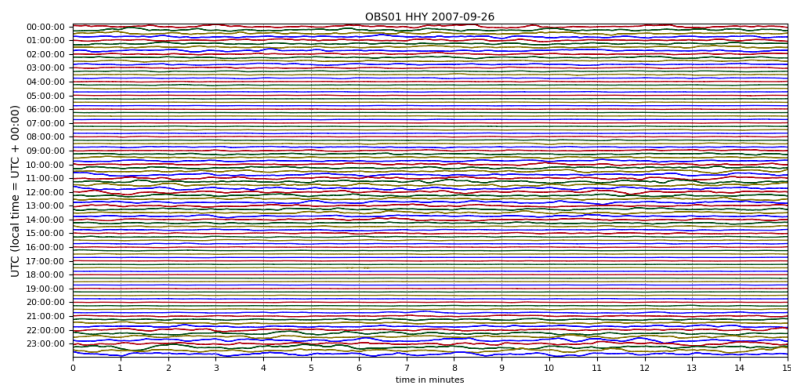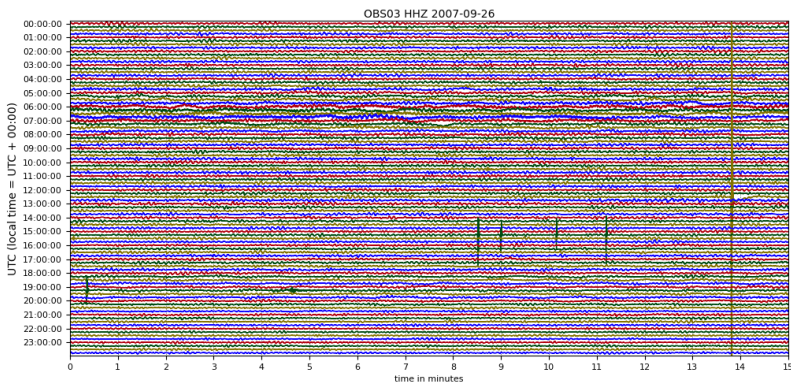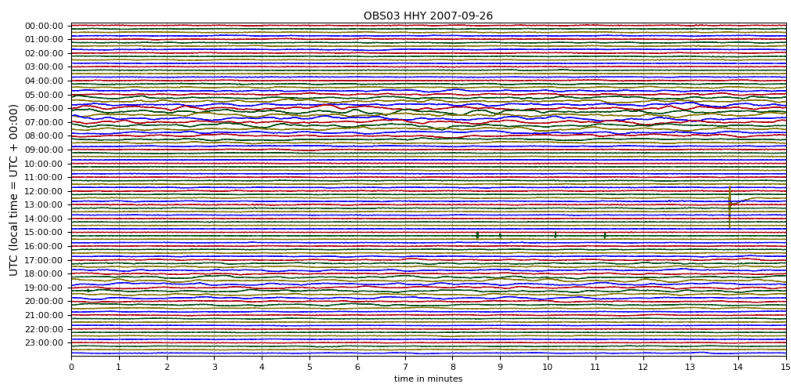

2007-09-26T00:00:00.02 - 2007-09-27T00:00:00.01

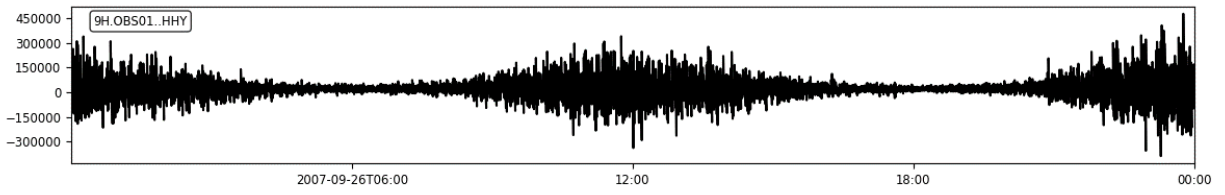

2007-09-26T00:00:00.02 - 2007-09-27T00:00:00.01

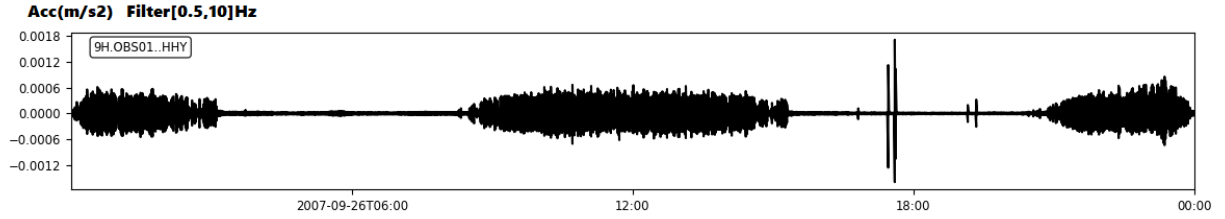

2007-09-26T00:00:00.02 - 2007-09-27T00:00:00.01

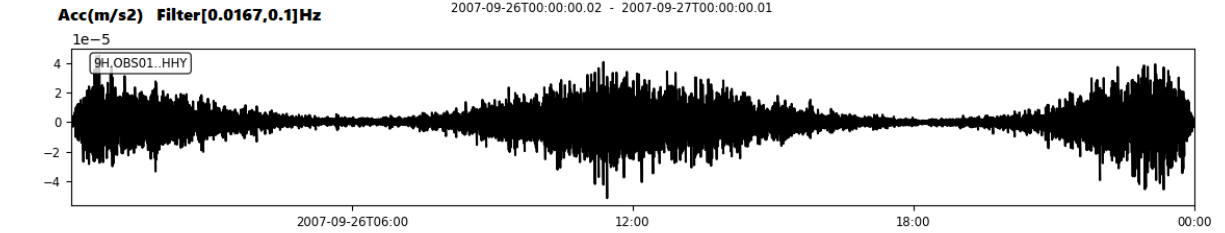

2007-09-26T00:00:00.03 - 2007-09-27T00:00:00.01

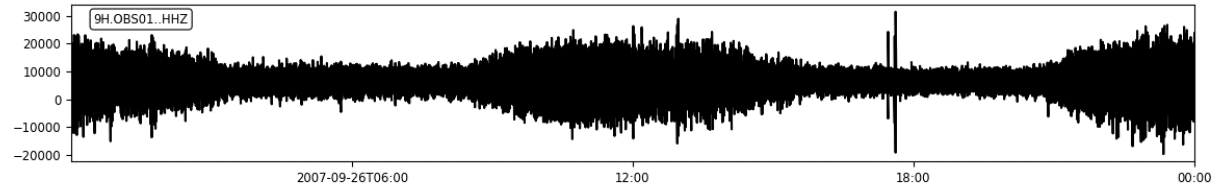

2007-09-26T00:00:00.03 - 2007-09-27T00:00:00.01

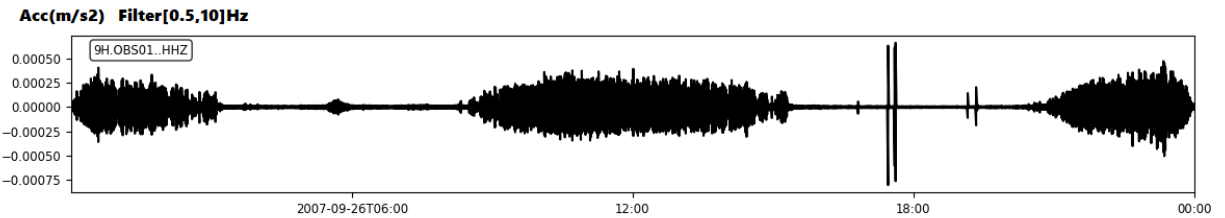

2007-09-26T00:00:00.03 - 2007-09-27T00:00:00.01

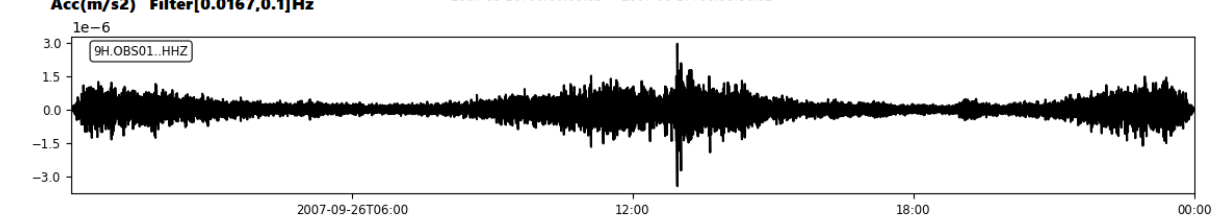

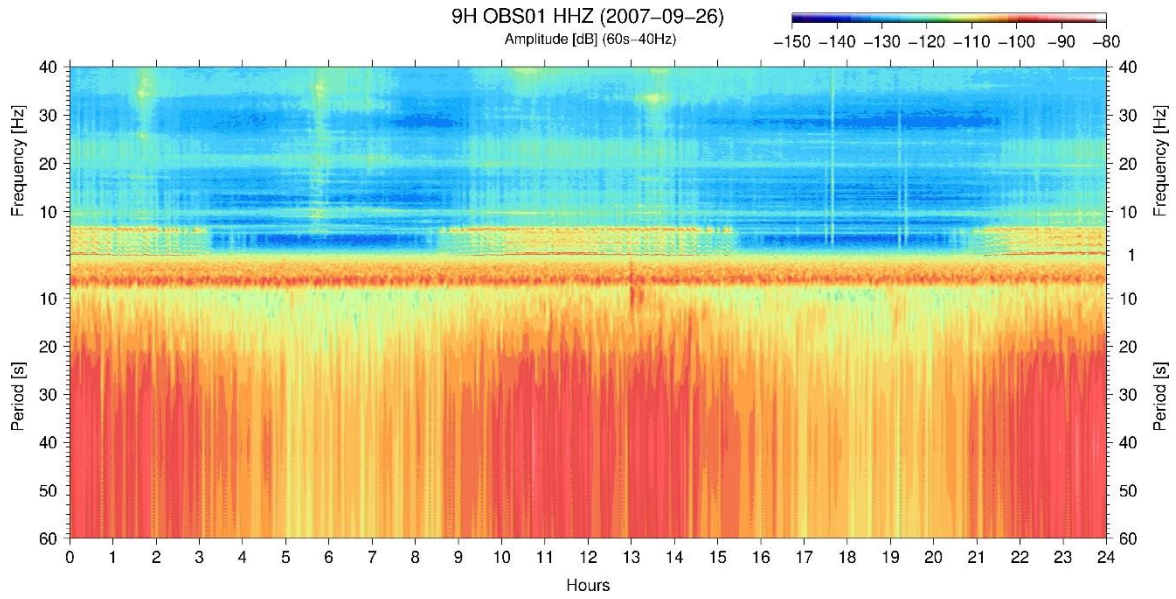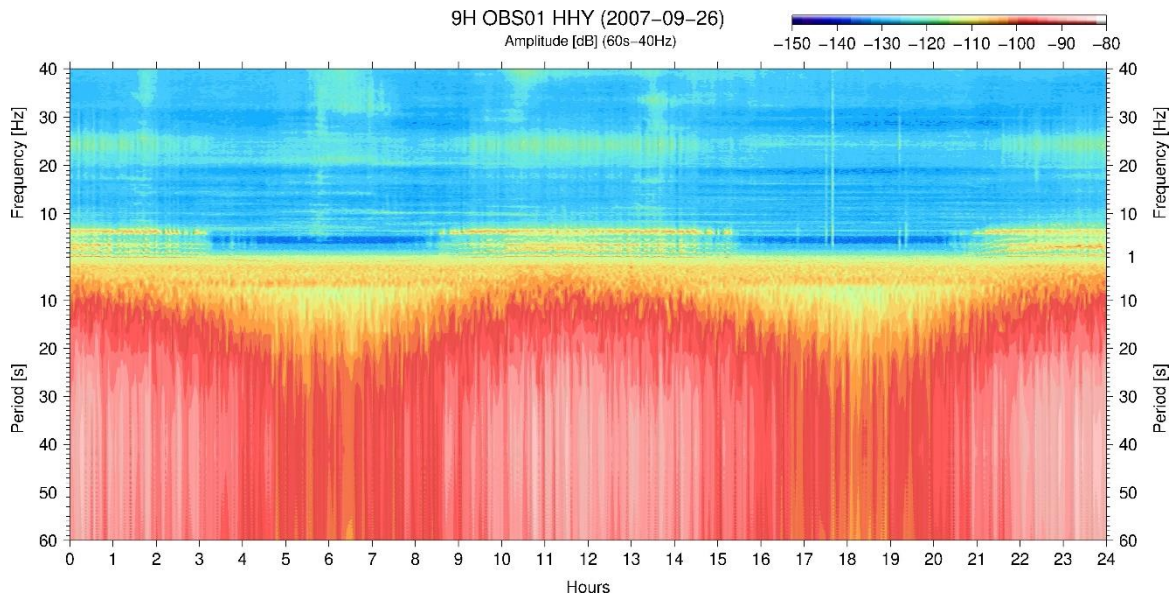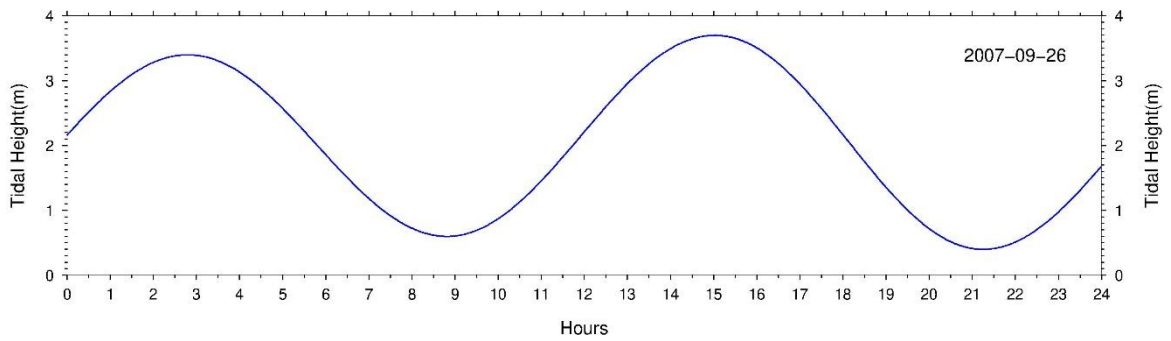

2007-09-26T00:00:00.02 - 2007-09-27T00:00:00.02

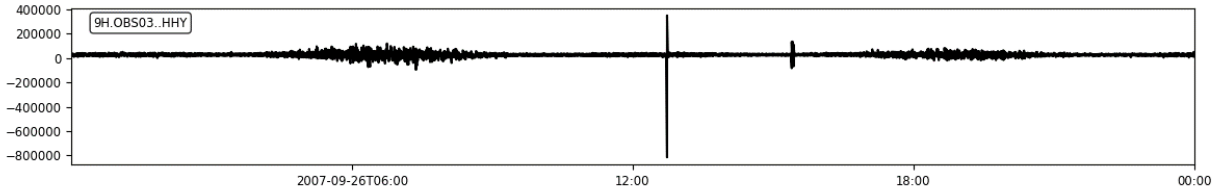

2007-09-26T00:00:00.02 - 2007-09-27T00:00:00.02

**Acc(m/s<sup>2</sup>) Filter[0.5,10]Hz**

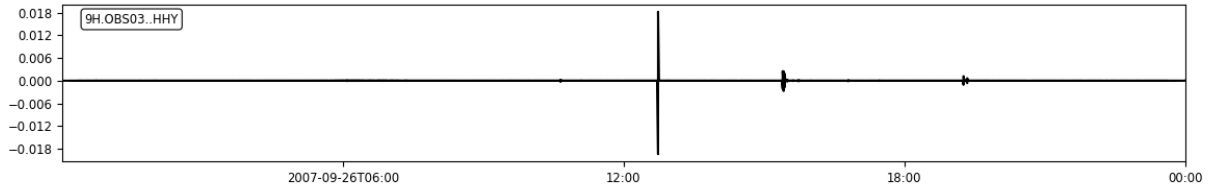

2007-09-26T00:00:00.02 - 2007-09-27T00:00:00.02

**Acc(m/s<sup>2</sup>) Filter[0.0167,0.1]Hz**

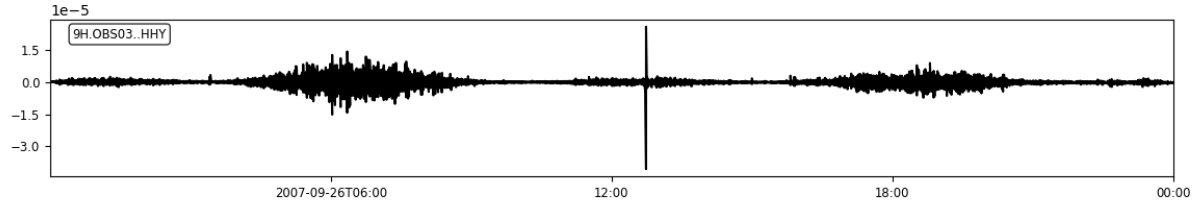

2007-09-26T00:00:00.02 - 2007-09-27T00:00:00.01

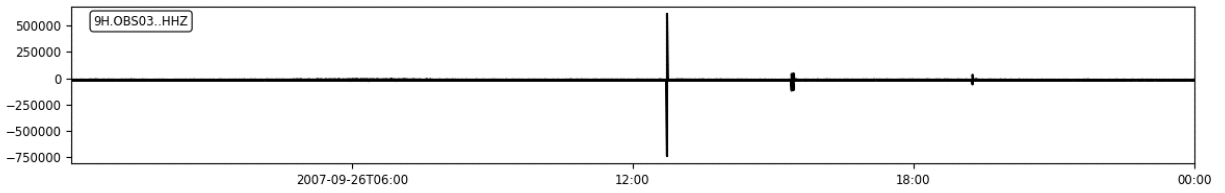

2007-09-26T00:00:00.02 - 2007-09-27T00:00:00.01

**Acc(m/s<sup>2</sup>) Filter[0.5,10]Hz**

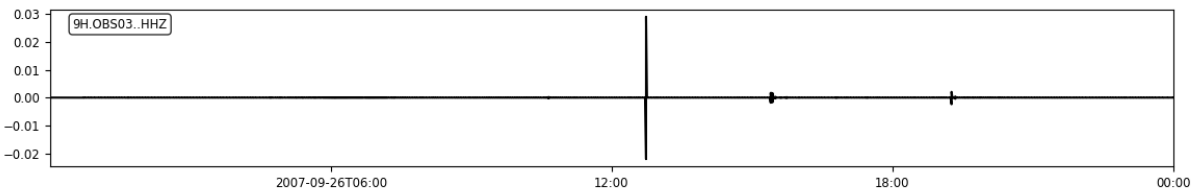

2007-09-26T00:00:00.02 - 2007-09-27T00:00:00.01

**Acc(m/s<sup>2</sup>) Filter[0.0167,0.1]Hz**

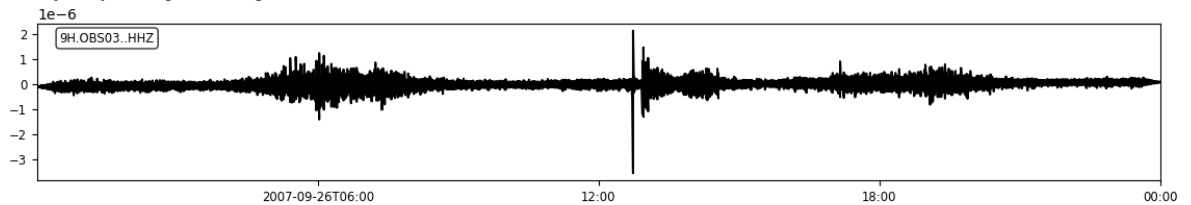



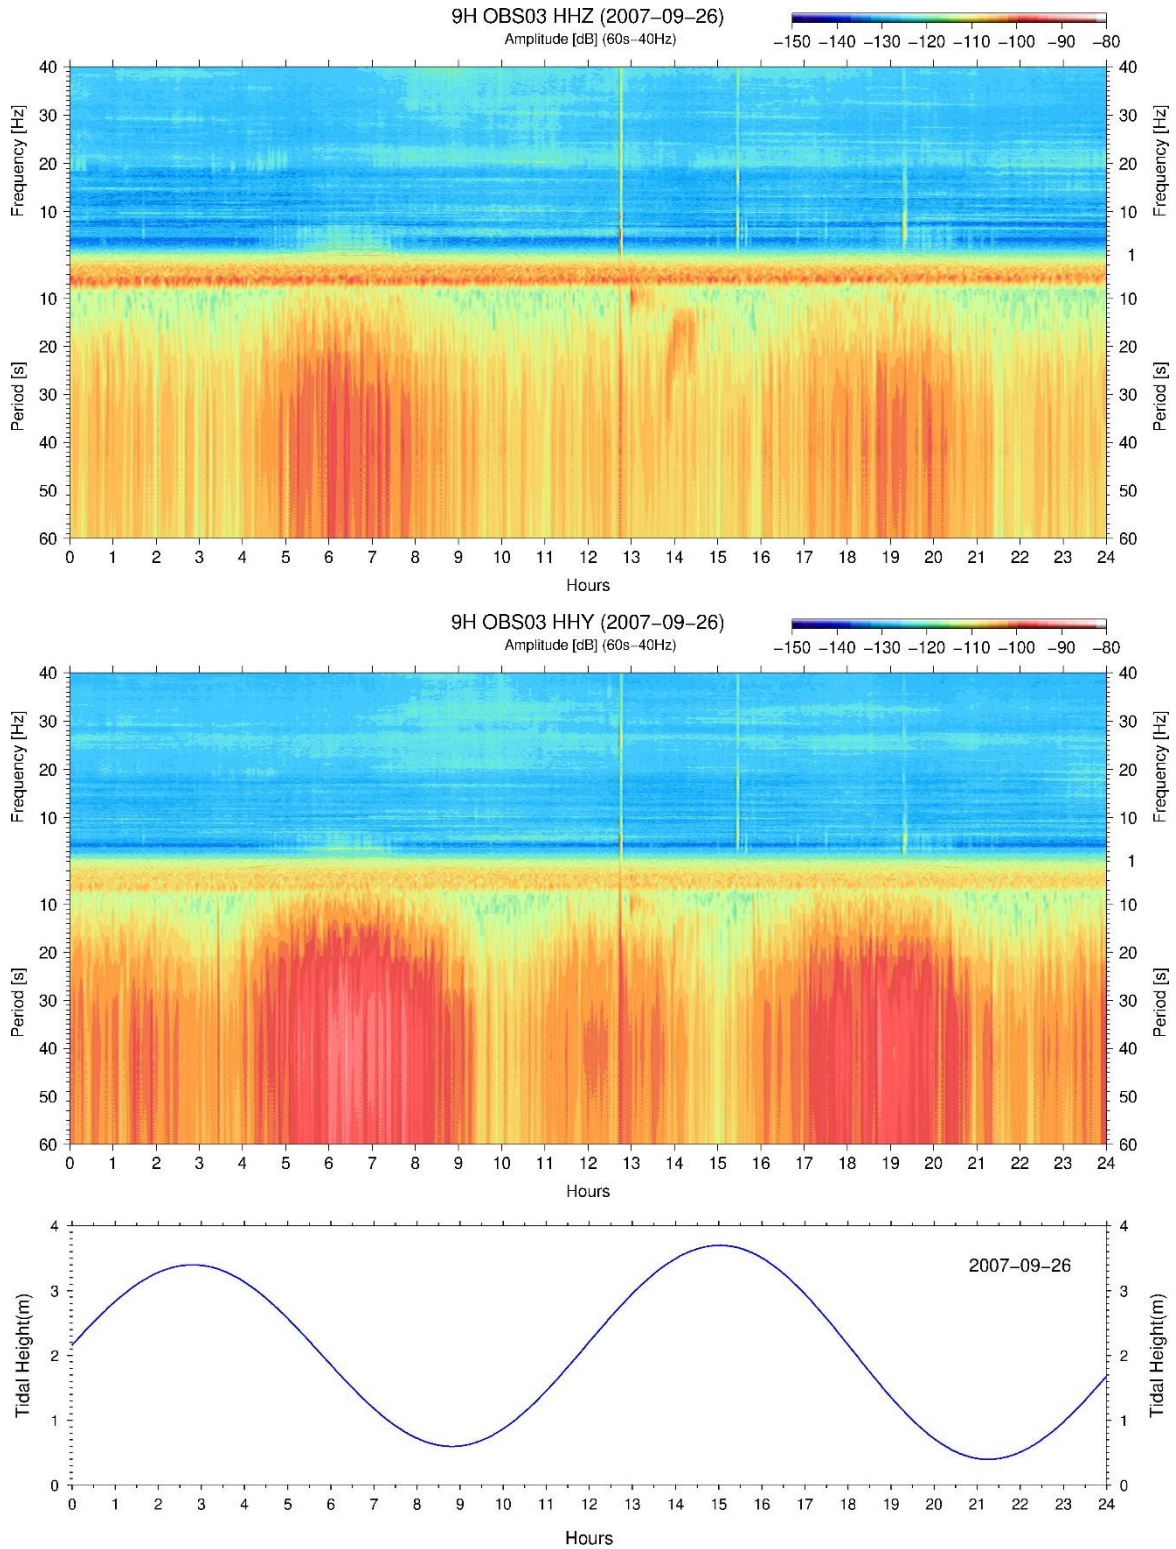

**Figure S17 | OBS01-OBS03 2007-09-26** – Day plot, the raw waveform in counts of the vertical Z and horizontal Y components, signals corrected for instrument response to show acceleration ( $m/s^2$ ) and filtered in the short and long period band, spectrogram and tidal height in Sines (maximum tidal range of 3.4m), showing the effect of tilt noise (20-60s), harmonic tremor (0.5-6Hz), short duration events and secondary microseism.

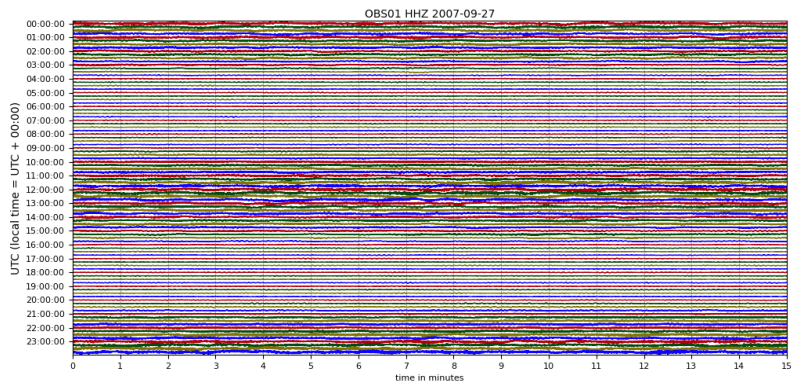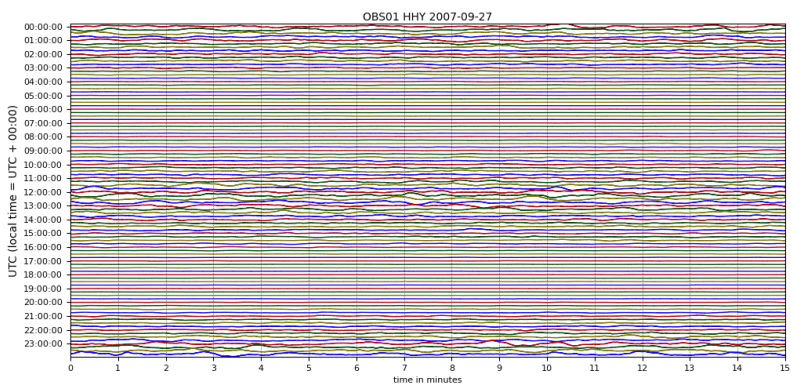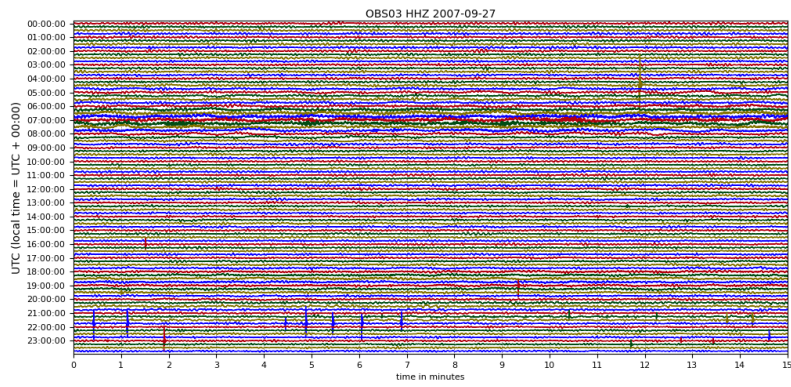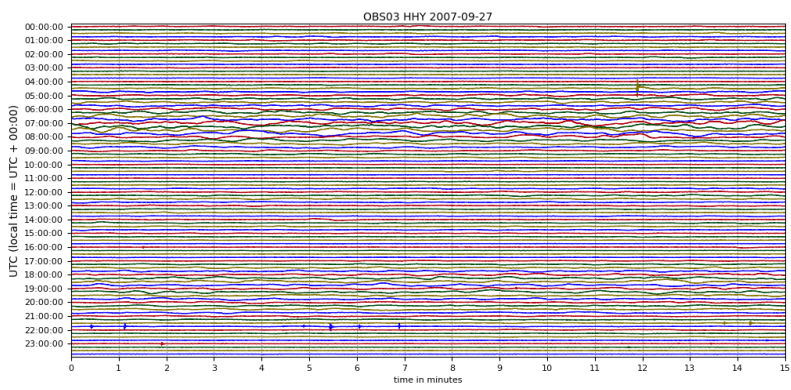

2007-09-27T00:00:00.02 - 2007-09-28T00:00:00.01

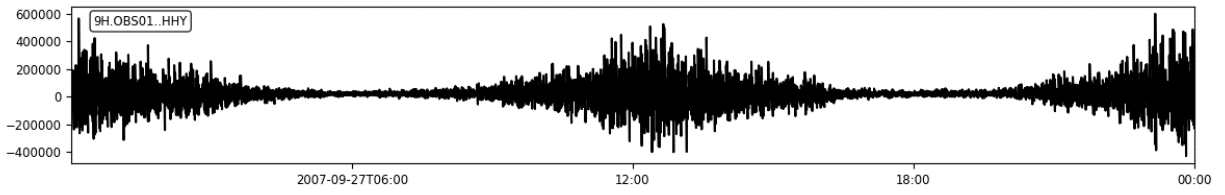

2007-09-27T00:00:00.02 - 2007-09-28T00:00:00.01

**Acc(m/s<sup>2</sup>) Filter[0.5,10]Hz**

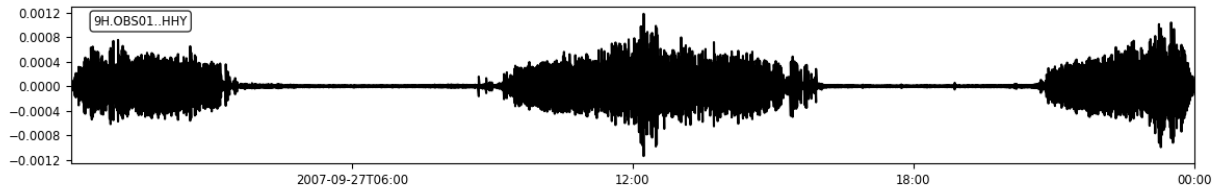

2007-09-27T00:00:00.02 - 2007-09-28T00:00:00.01

**Acc(m/s<sup>2</sup>) Filter[0.0167,0.1]Hz**

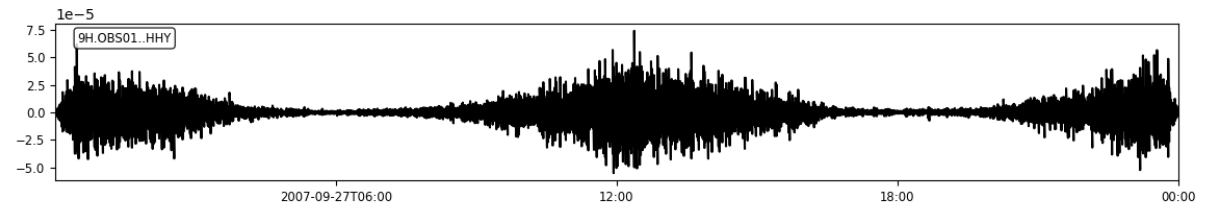

2007-09-27T00:00:00.02 - 2007-09-28T00:00:00.01

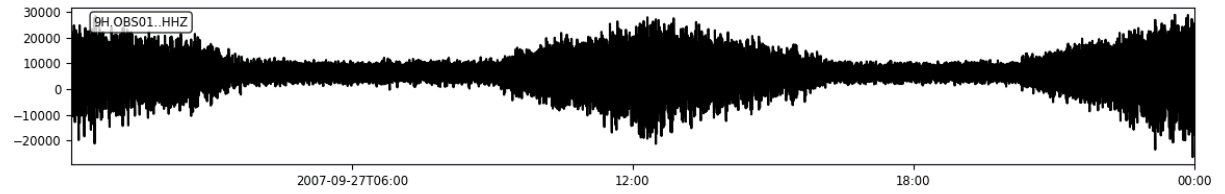

2007-09-27T00:00:00.02 - 2007-09-28T00:00:00.01

**Acc(m/s<sup>2</sup>) Filter[0.5,10]Hz**

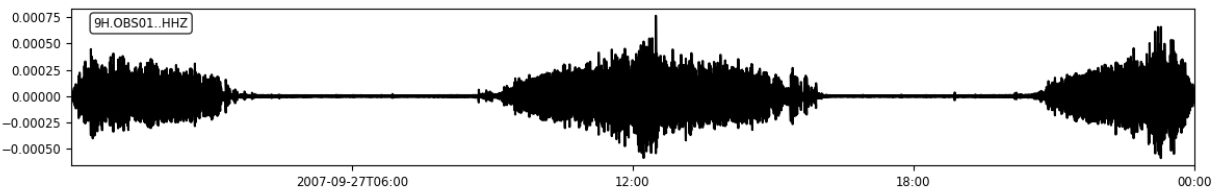

2007-09-27T00:00:00.02 - 2007-09-28T00:00:00.01

**Acc(m/s<sup>2</sup>) Filter[0.0167,0.1]Hz**

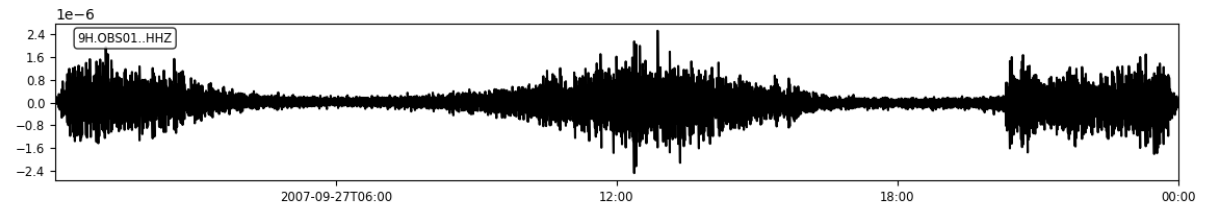

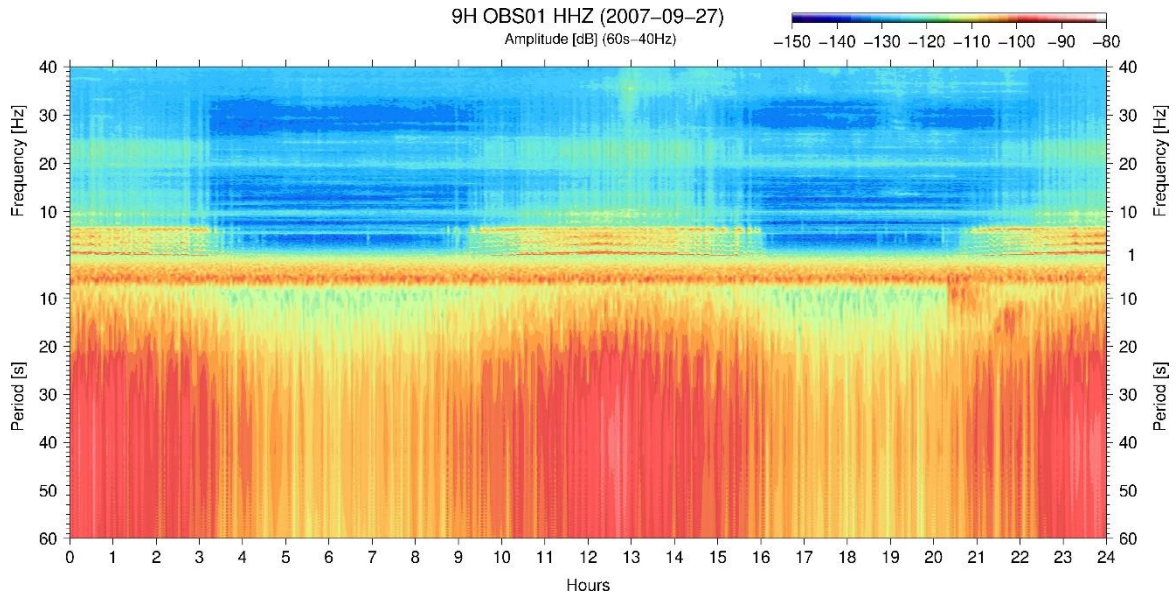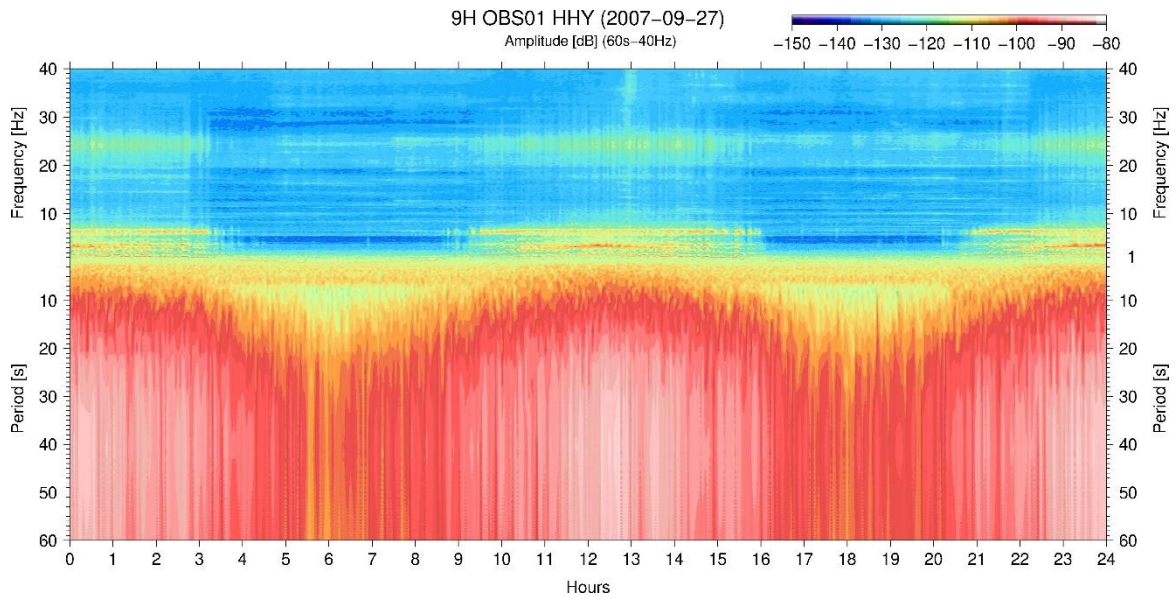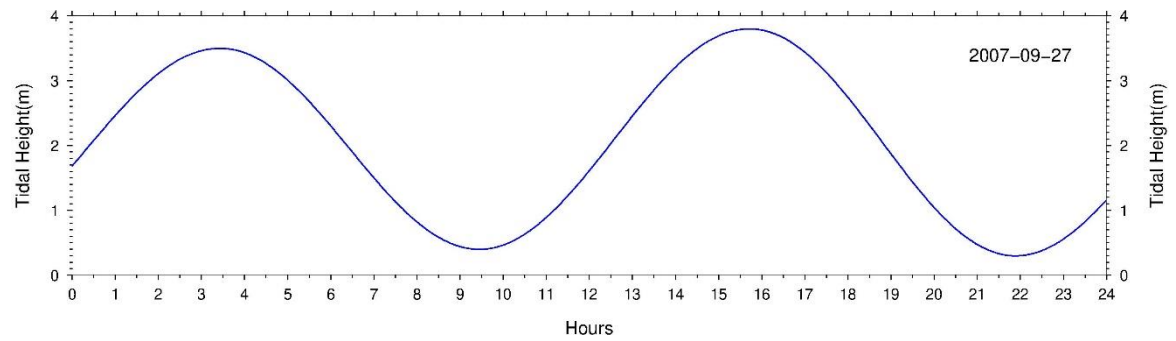

2007-09-27T00:00:00.03 - 2007-09-28T00:00:00.01

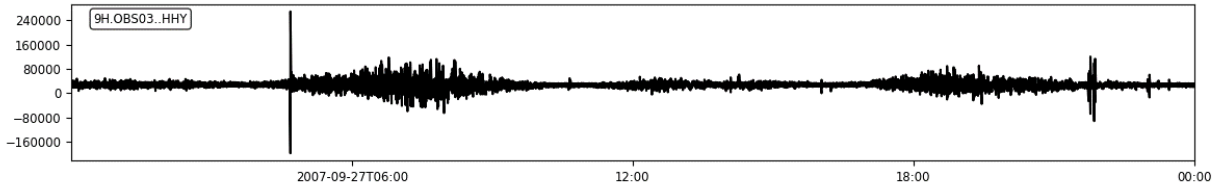

2007-09-27T00:00:00.03 - 2007-09-28T00:00:00.01

**Acc(m/s<sup>2</sup>) Filter[0.5,10]Hz**

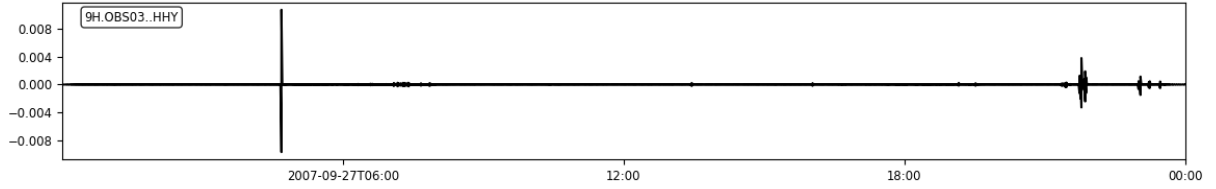

2007-09-27T00:00:00.03 - 2007-09-28T00:00:00.01

**Acc(m/s<sup>2</sup>) Filter[0.0167,0.1]Hz**

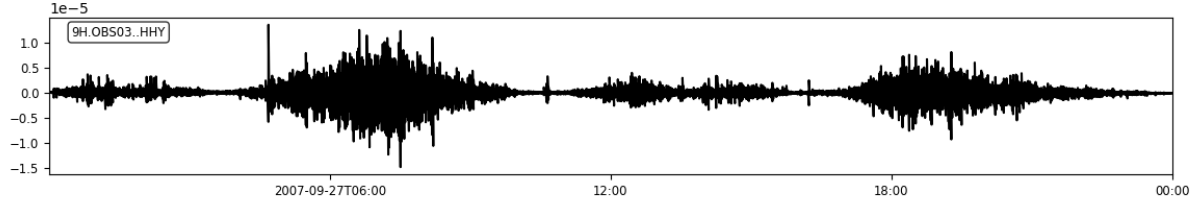

2007-09-27T00:00:00.02 - 2007-09-28T00:00:00

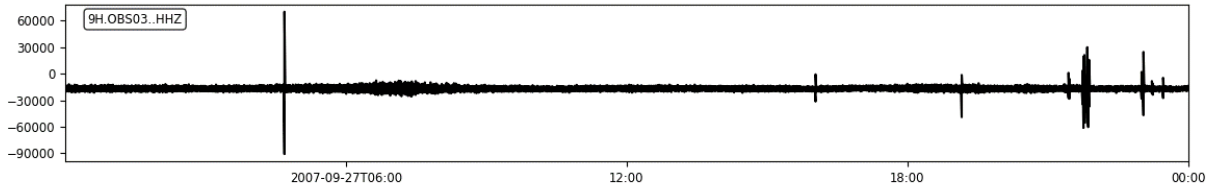

2007-09-27T00:00:00.02 - 2007-09-28T00:00:00

**Acc(m/s<sup>2</sup>) Filter[0.5,10]Hz**

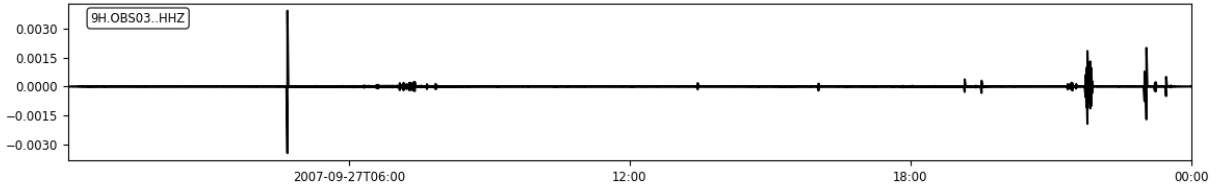

2007-09-27T00:00:00.02 - 2007-09-28T00:00:00

**Acc(m/s<sup>2</sup>) Filter[0.0167,0.1]Hz**

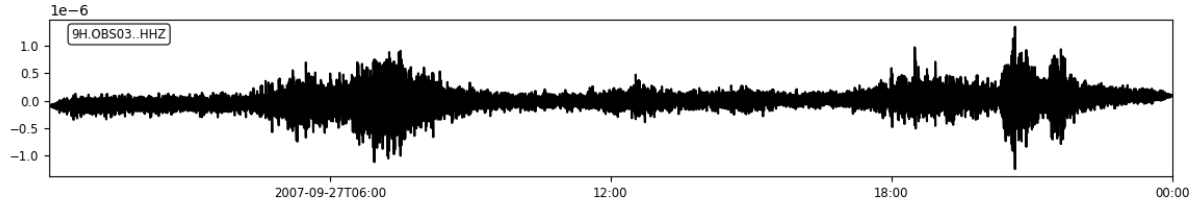

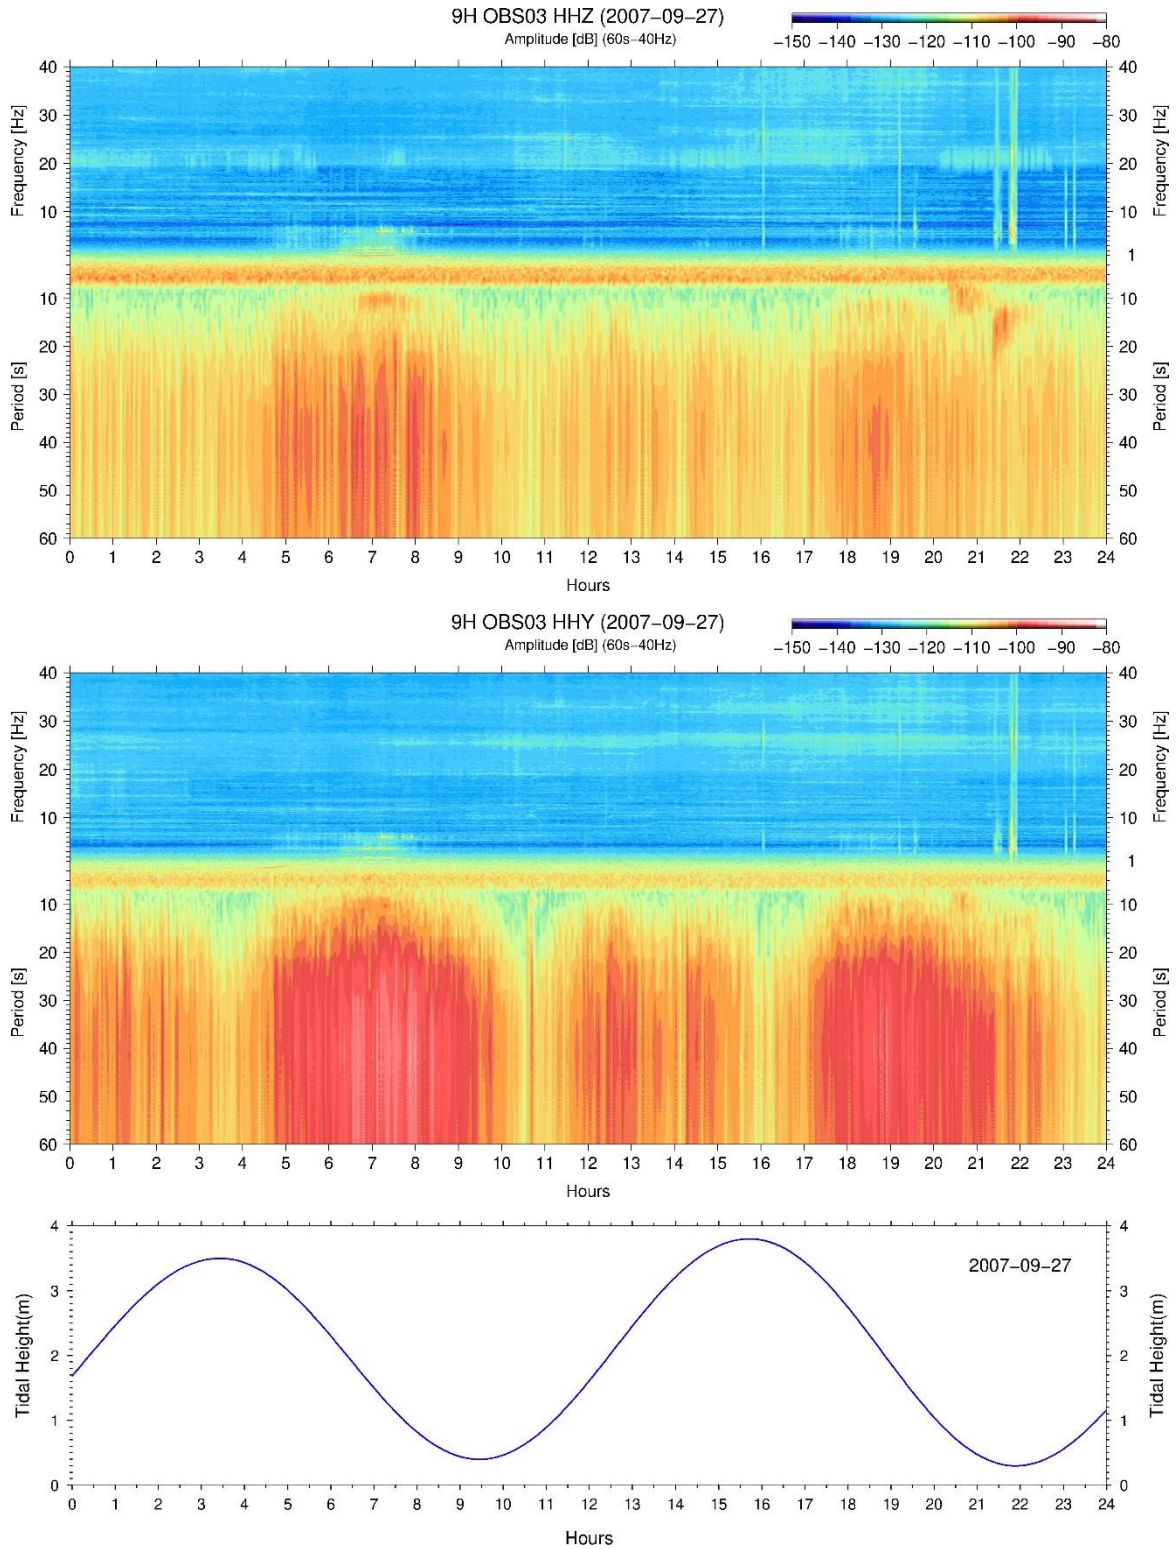

**Figure S18 | OBS01-OBS03 2007-09-27** – Day plot, the raw waveform in counts of the vertical Z and horizontal Y components, signals corrected for instrument response to show acceleration ( $m/s^2$ ) and filtered in the short and long period band, spectrogram and tidal height in Sines (maximum tidal range of 3.6m), showing the effect of tilt noise (20-60s), harmonic tremor (0.5-6Hz), short duration events, whale vocalization, secondary microseism and regional seismicity during spring tide.

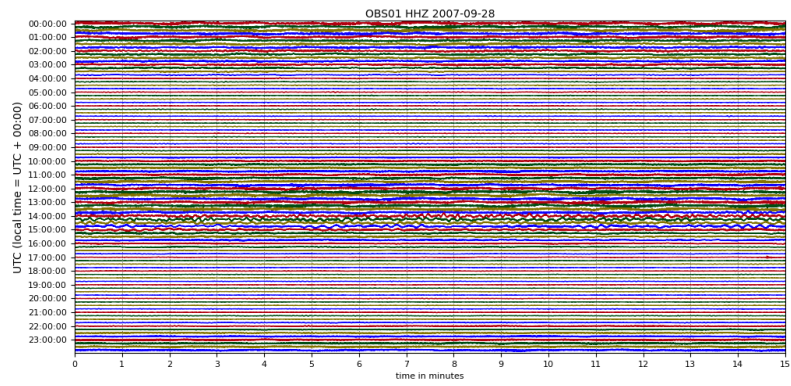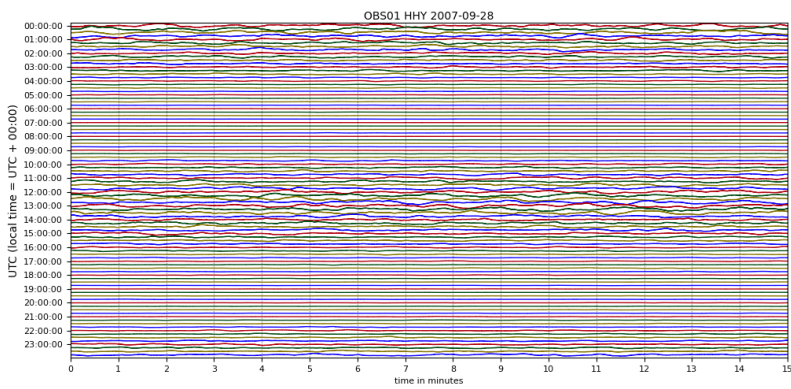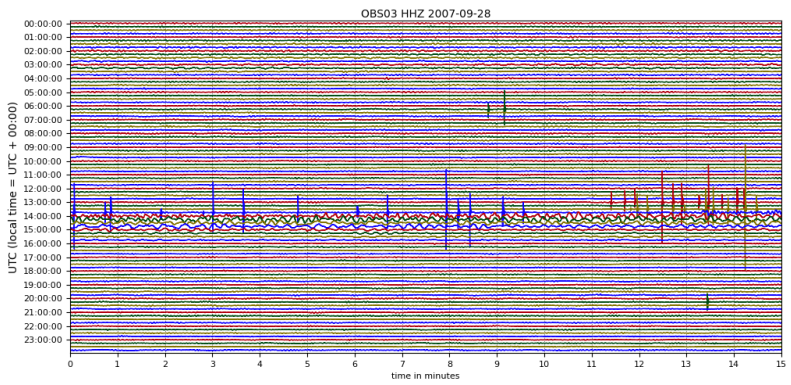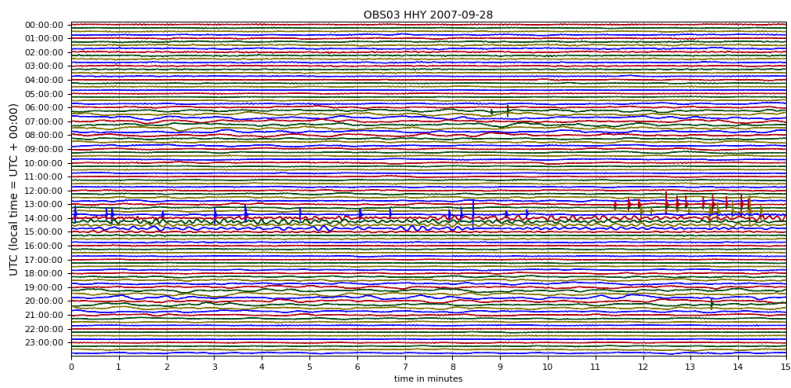

2007-09-28T00:00:00.02 - 2007-09-29T00:00:00

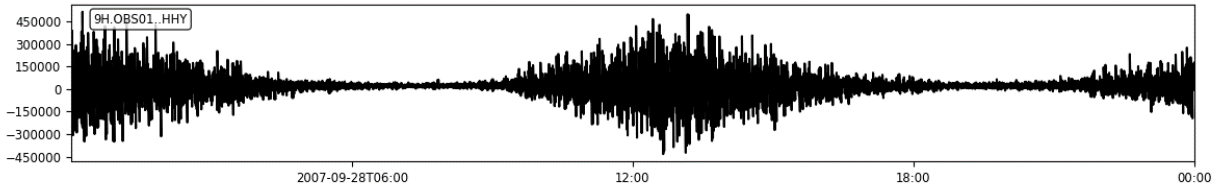

2007-09-28T00:00:00.02 - 2007-09-29T00:00:00

**Acc(m/s<sup>2</sup>) Filter[0.5,10]Hz**

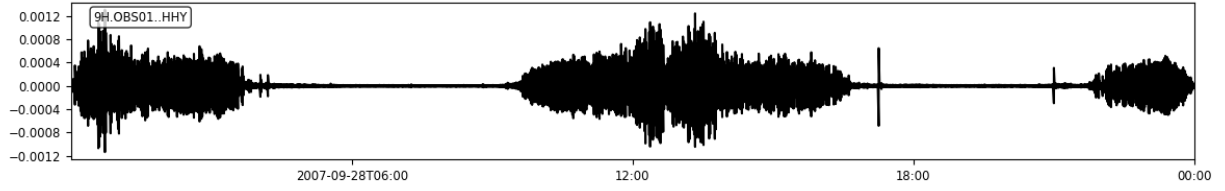

2007-09-28T00:00:00.02 - 2007-09-29T00:00:00

**Acc(m/s<sup>2</sup>) Filter[0.0167,0.1]Hz**

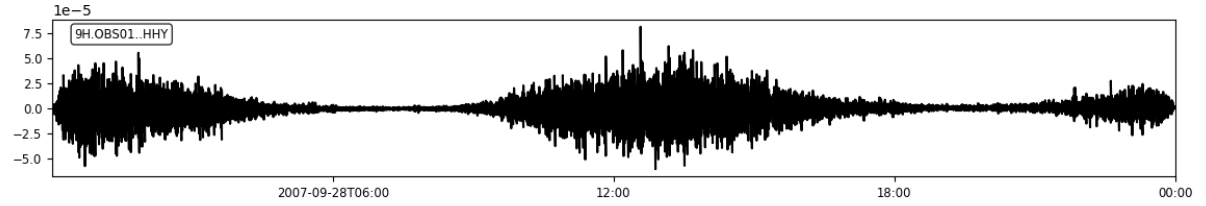

2007-09-28T00:00:00.02 - 2007-09-29T00:00:00.01

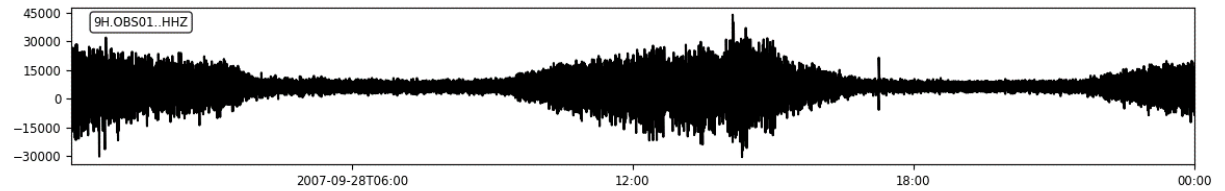

2007-09-28T00:00:00.02 - 2007-09-29T00:00:00.01

**Acc(m/s<sup>2</sup>) Filter[0.5,10]Hz**

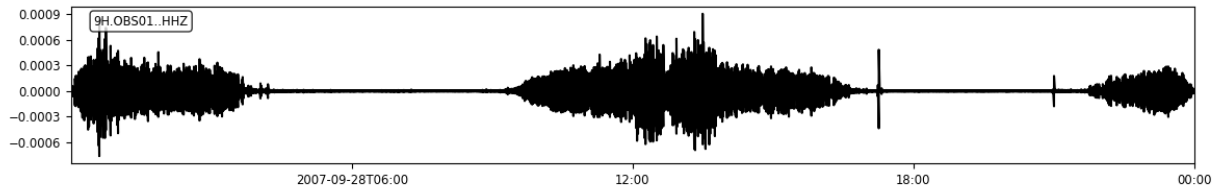

2007-09-28T00:00:00.02 - 2007-09-29T00:00:00.01

**Acc(m/s<sup>2</sup>) Filter[0.0167,0.1]Hz**

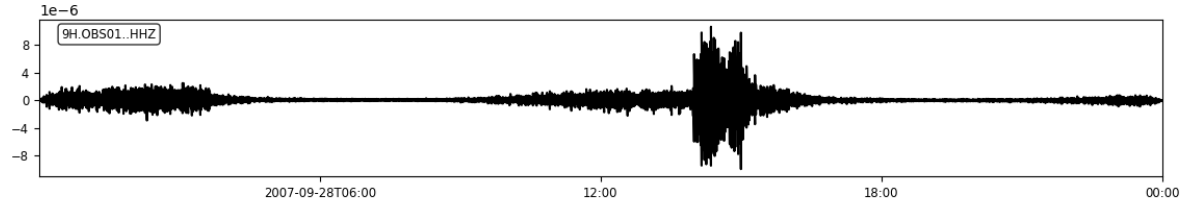



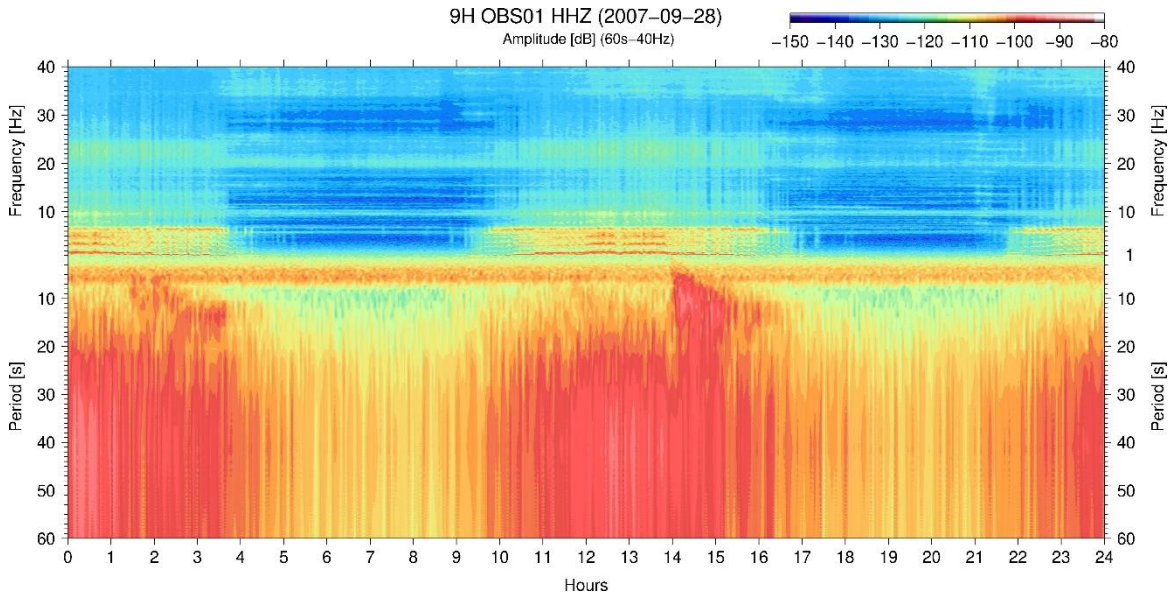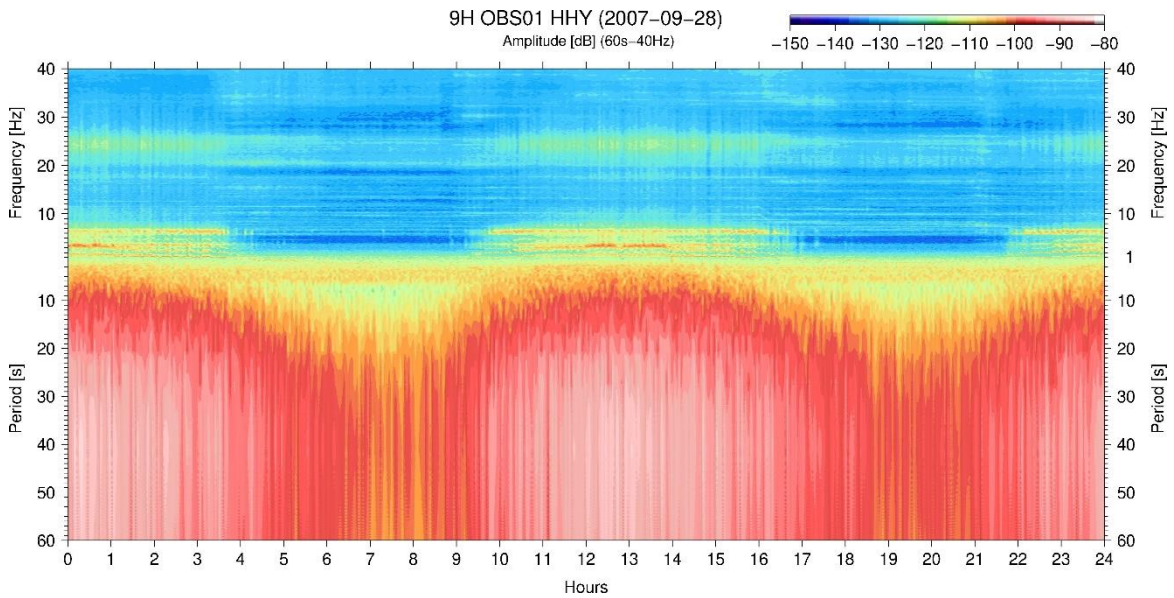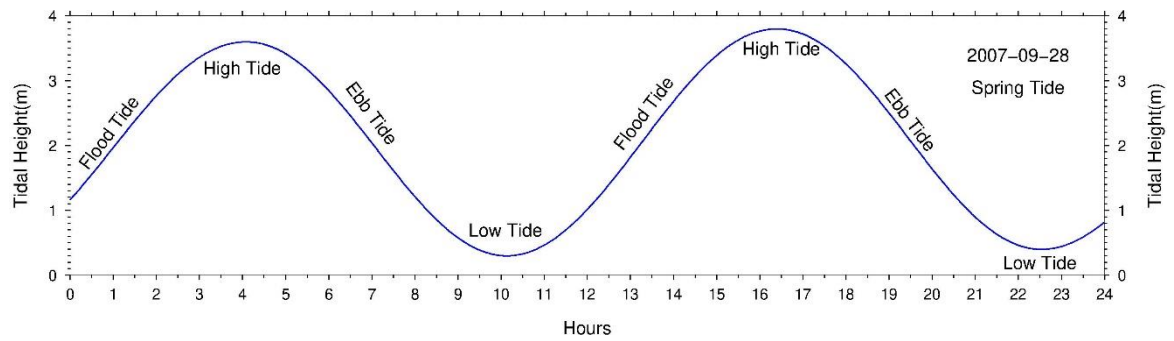

2007-09-28T00:00:00.02 - 2007-09-28T23:59:59.99

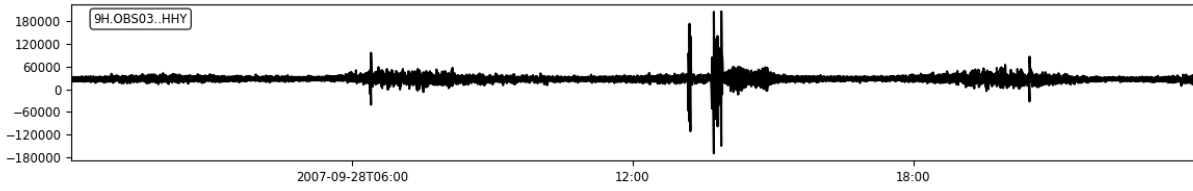

2007-09-28T00:00:00.02 - 2007-09-28T23:59:59.99

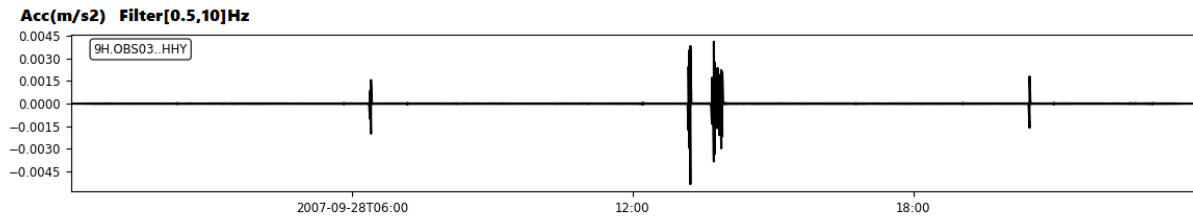

2007-09-28T00:00:00.02 - 2007-09-28T23:59:59.99

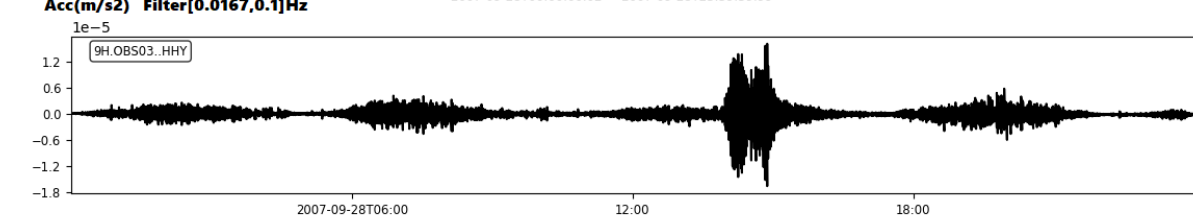

2007-09-28T00:00:00.01 - 2007-09-29T00:00:00.01

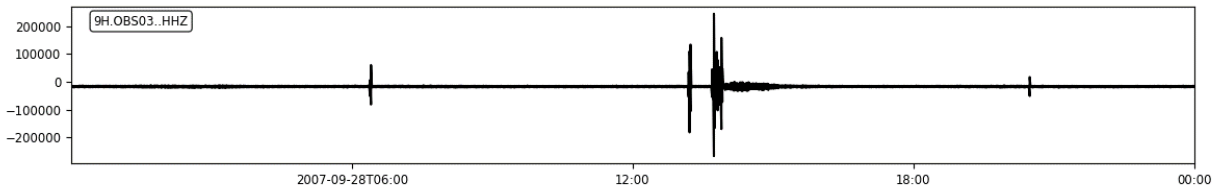

2007-09-28T00:00:00.01 - 2007-09-29T00:00:00.01

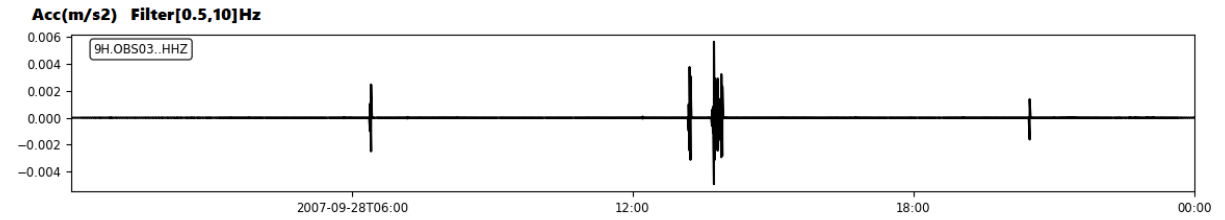

2007-09-28T00:00:00.01 - 2007-09-29T00:00:00.01

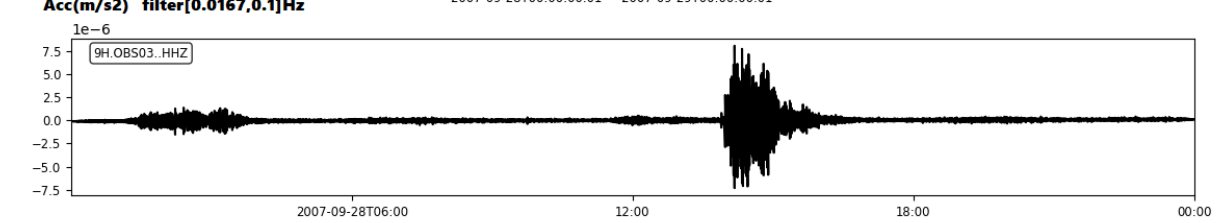

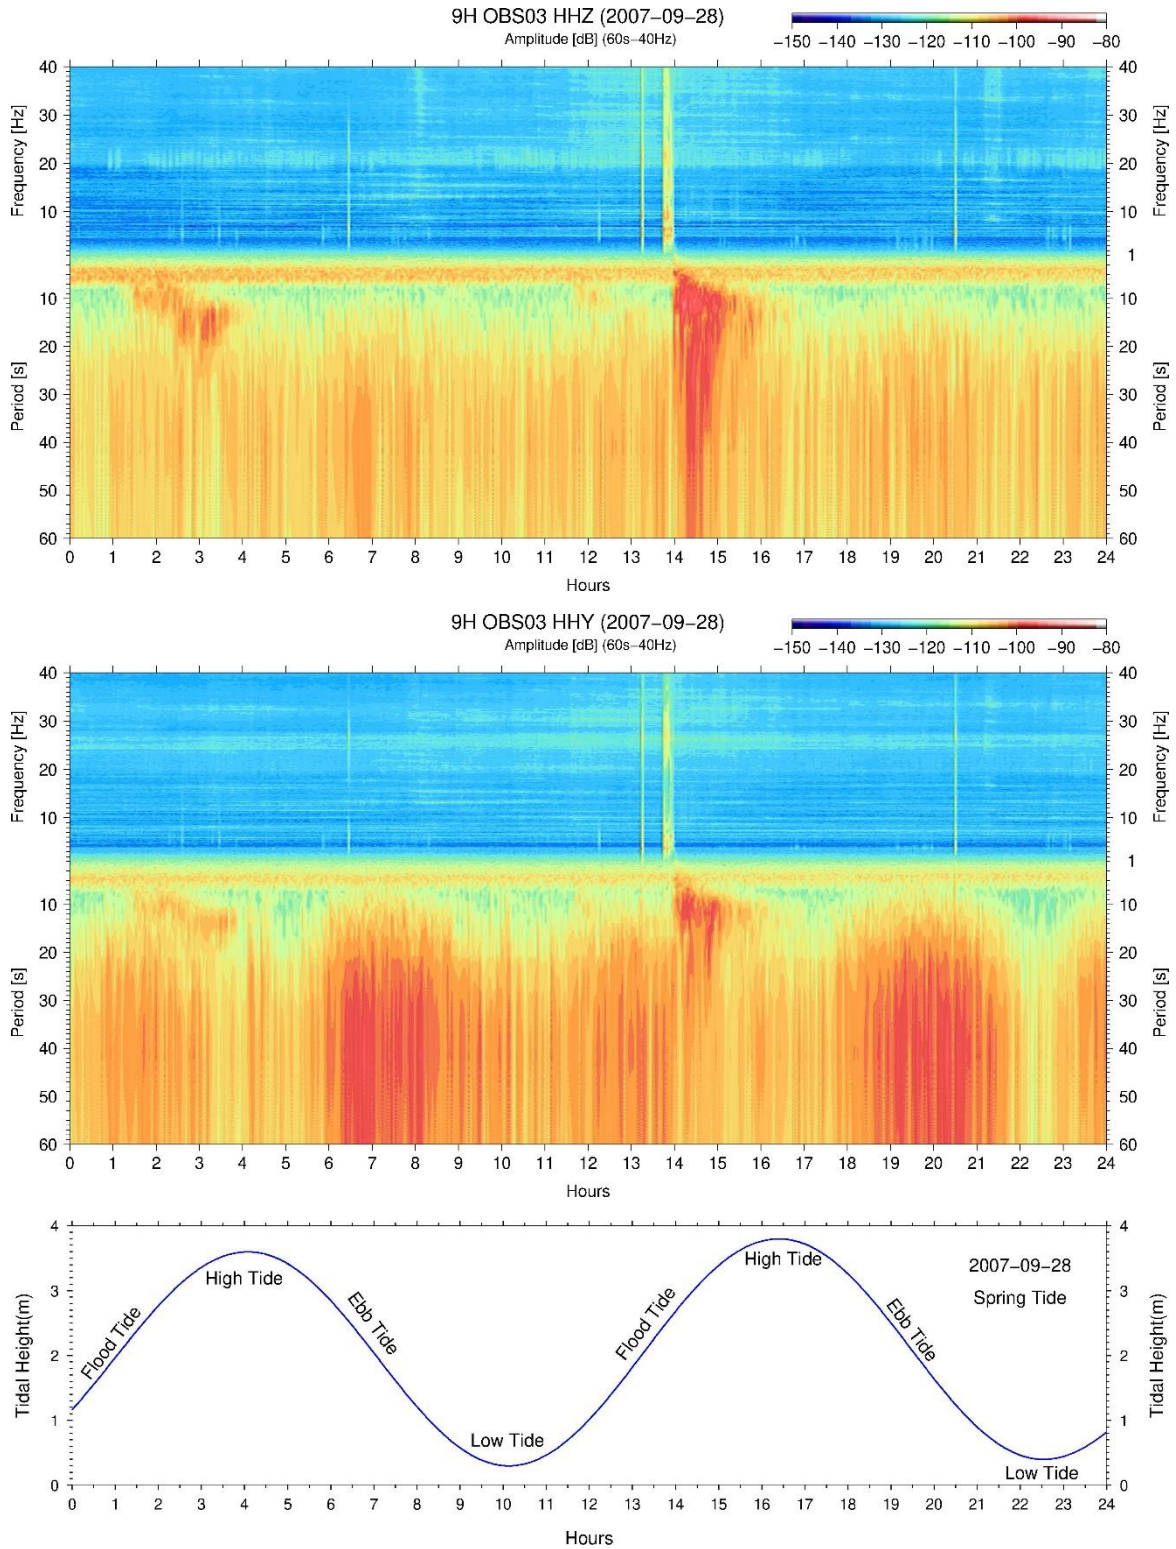

**Figure S19 | OBS01-OBS03 2007-09-28** – Day plot, the raw waveform in counts of the vertical Z and horizontal Y components, signals corrected for instrument response to show acceleration ( $m/s^2$ ) and filtered in the short and long period band, spectrogram and tidal height in Sines (maximum tidal range of 3.6m), showing two distant earthquakes (Volcano Islands, Japan: origin time: 13:38:56, with Mw of 7.4 and Southeast of Loyalty Islands: origin time: 01:35:54 with Mw 6.6), the effect of tilt noise (20-60s), harmonic tremor (0.5-6Hz), short duration events and whale vocalisation (OBS03) during spring tide.

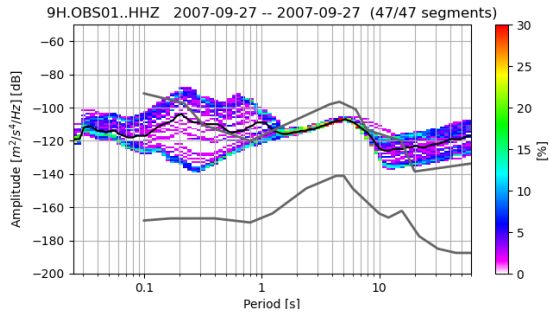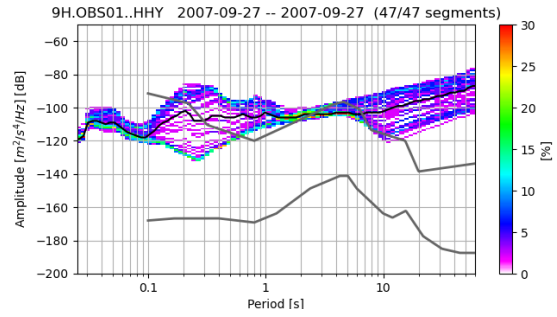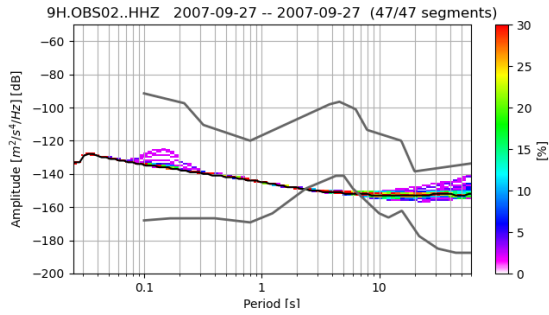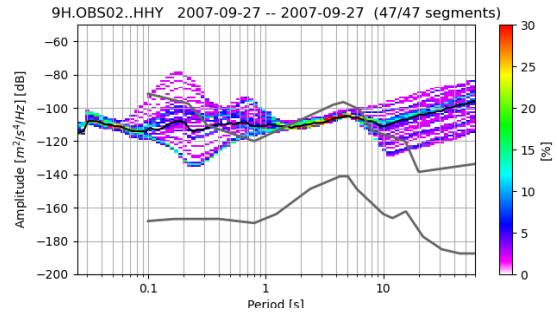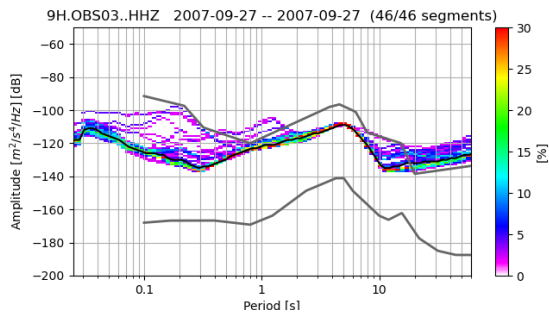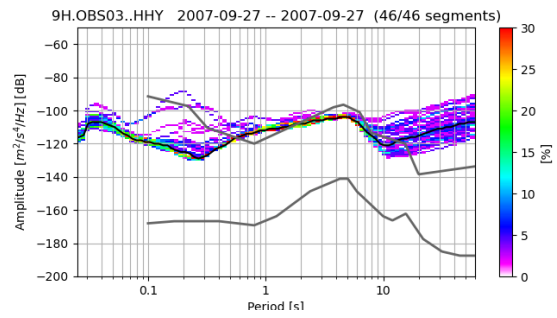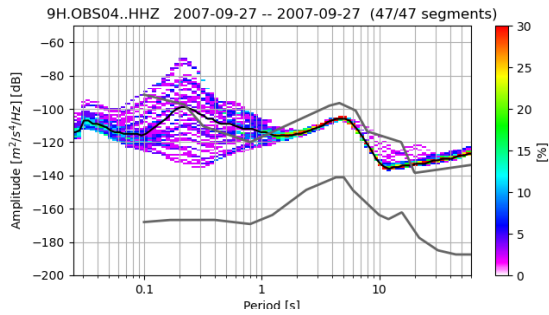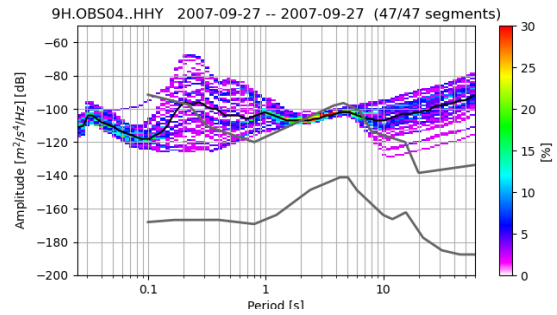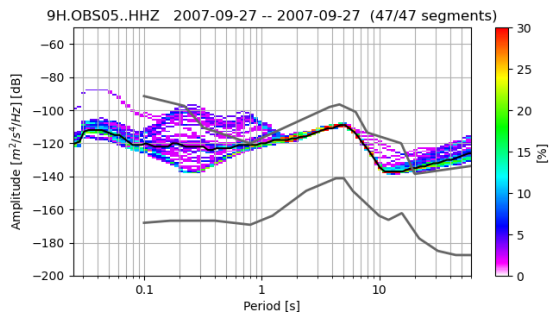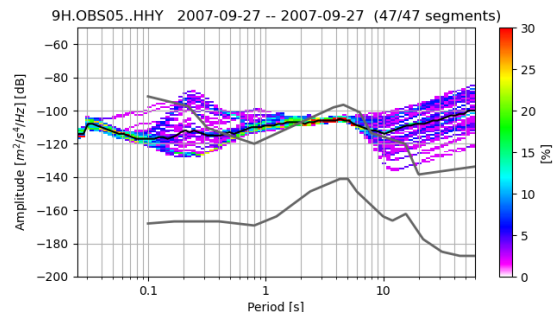

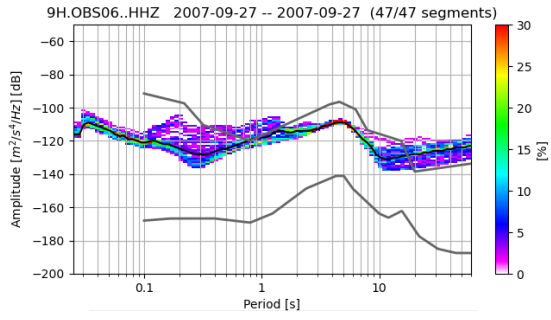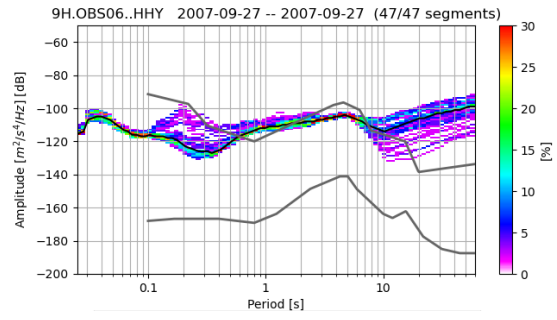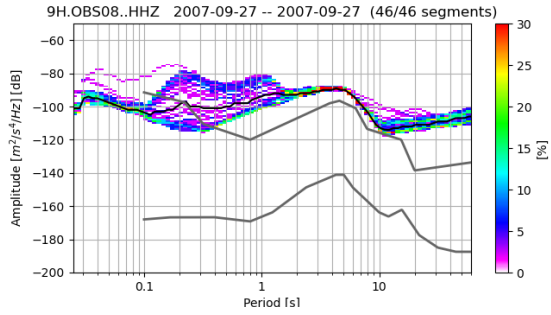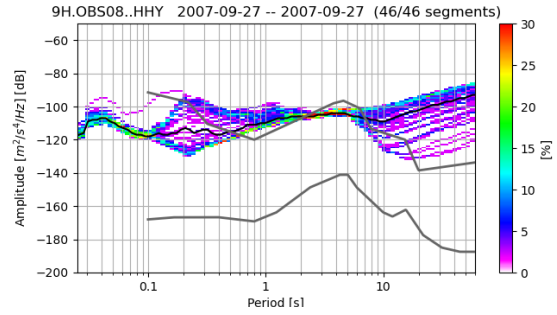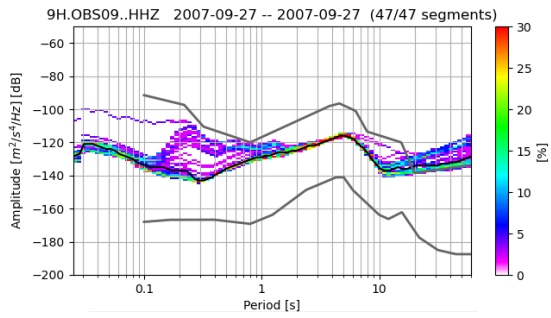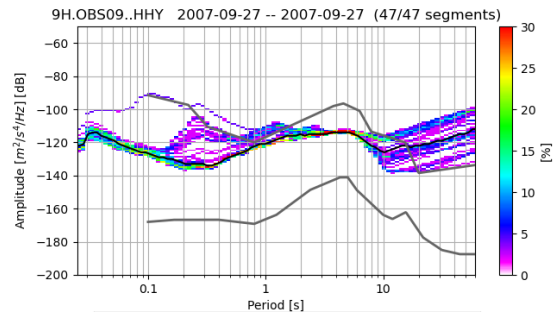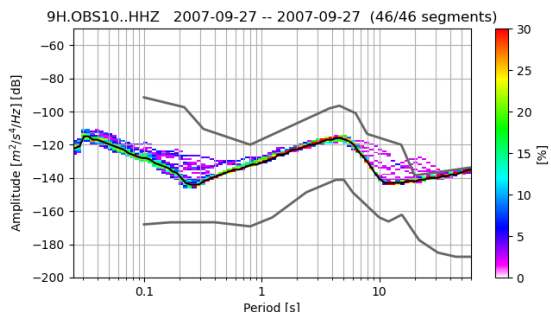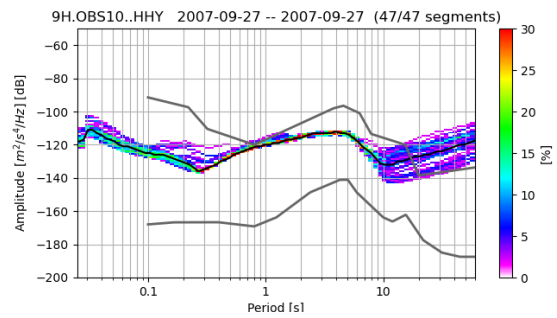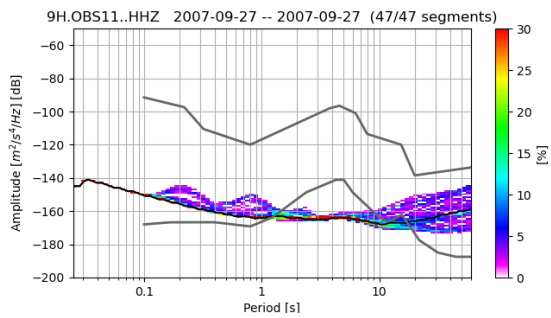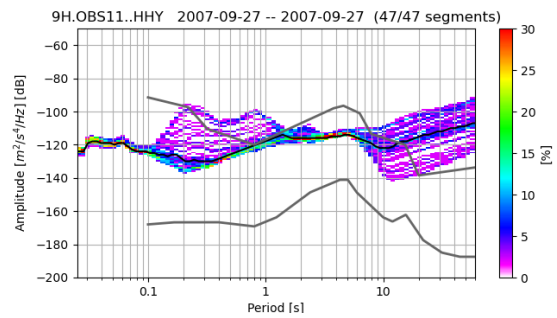

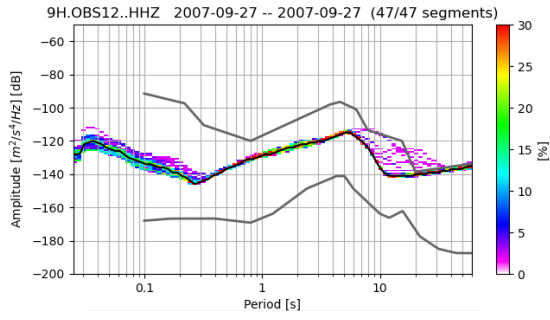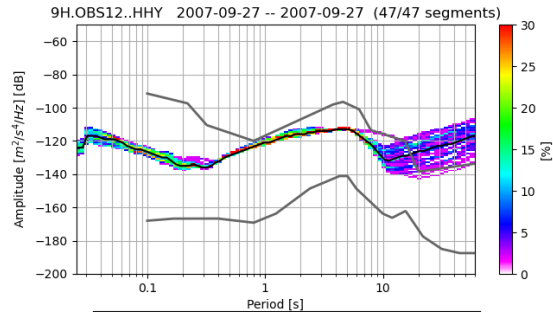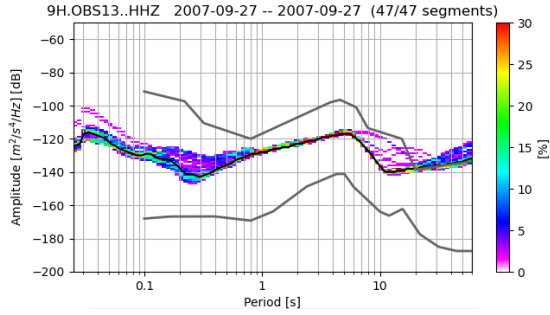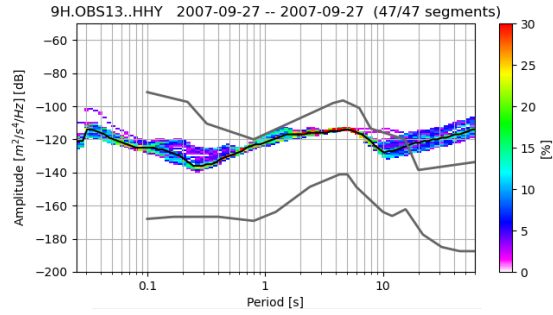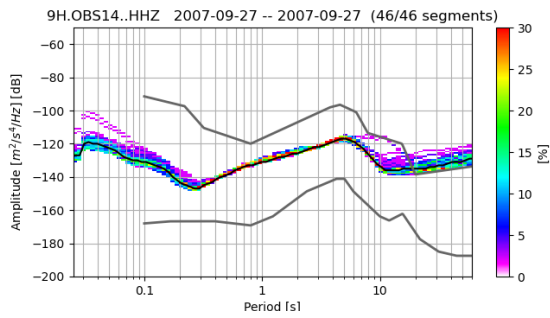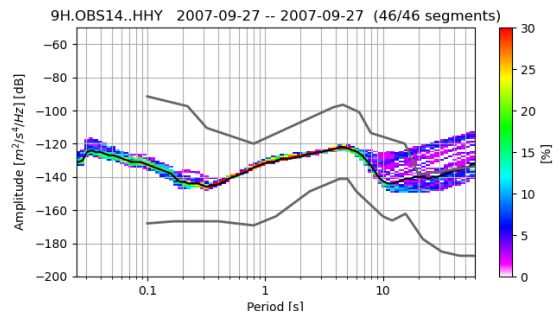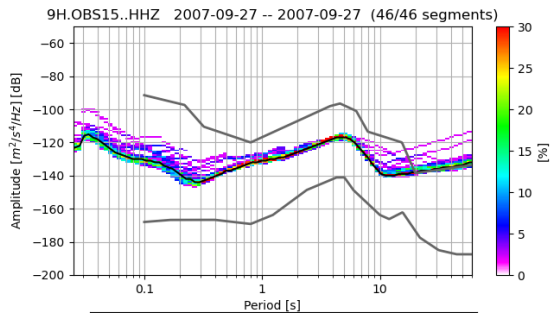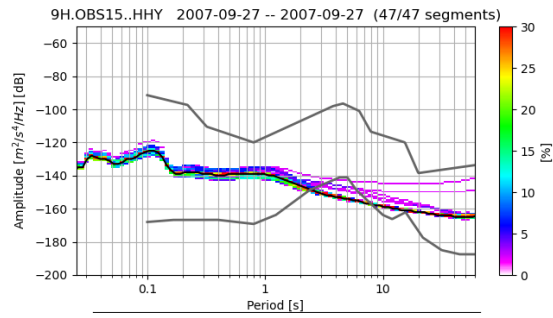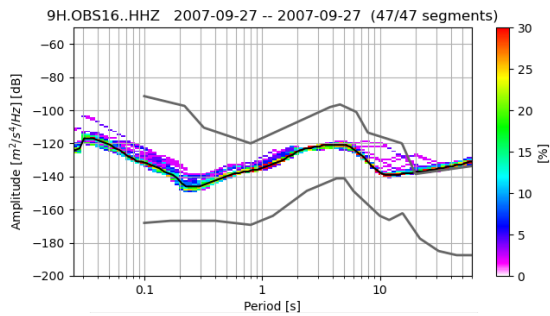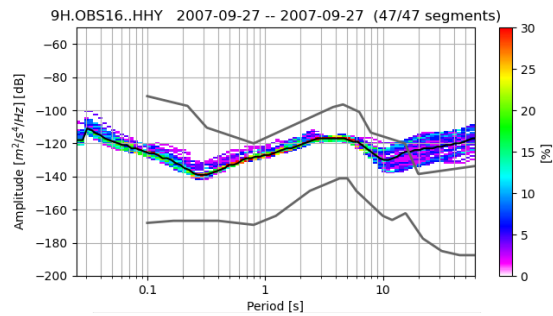

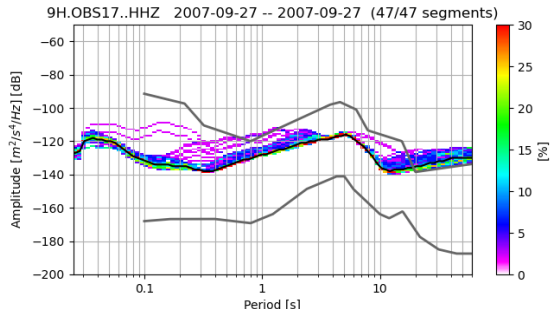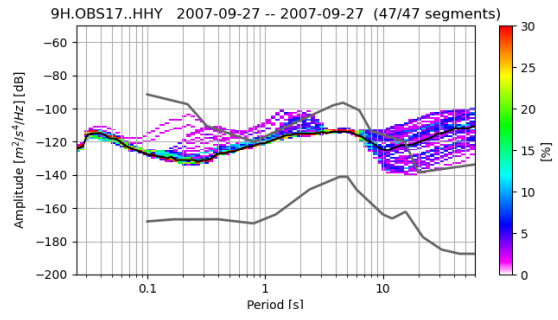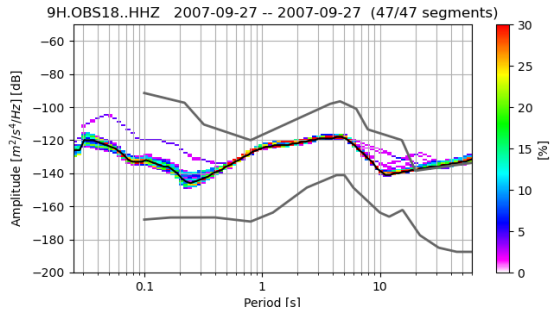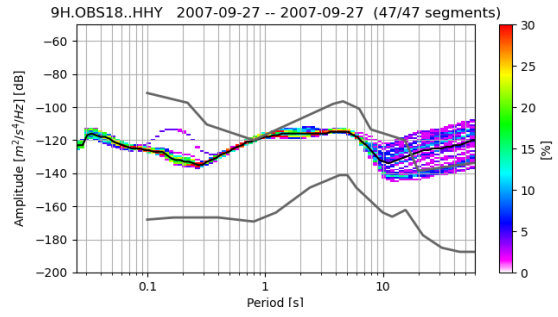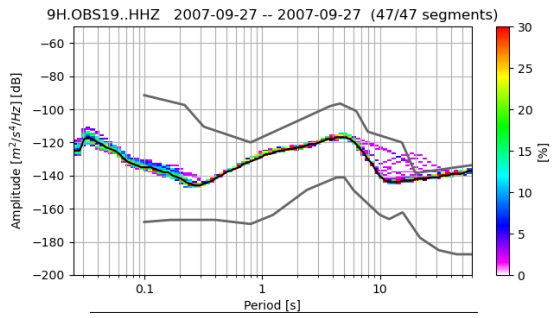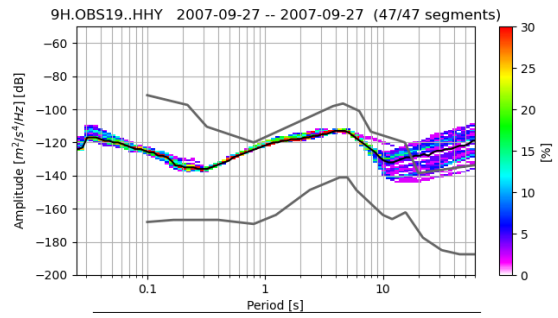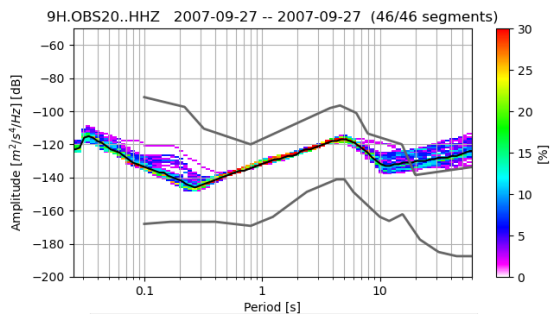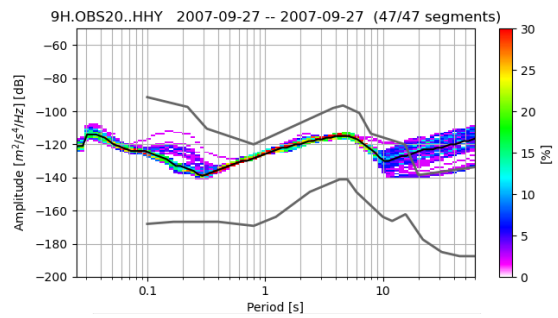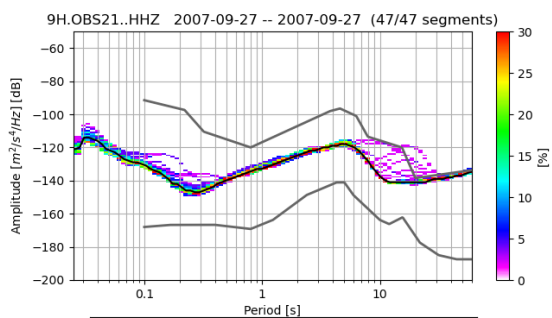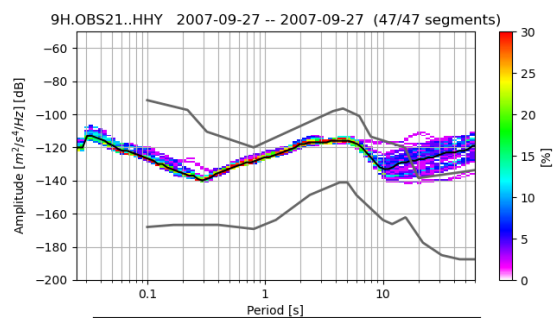

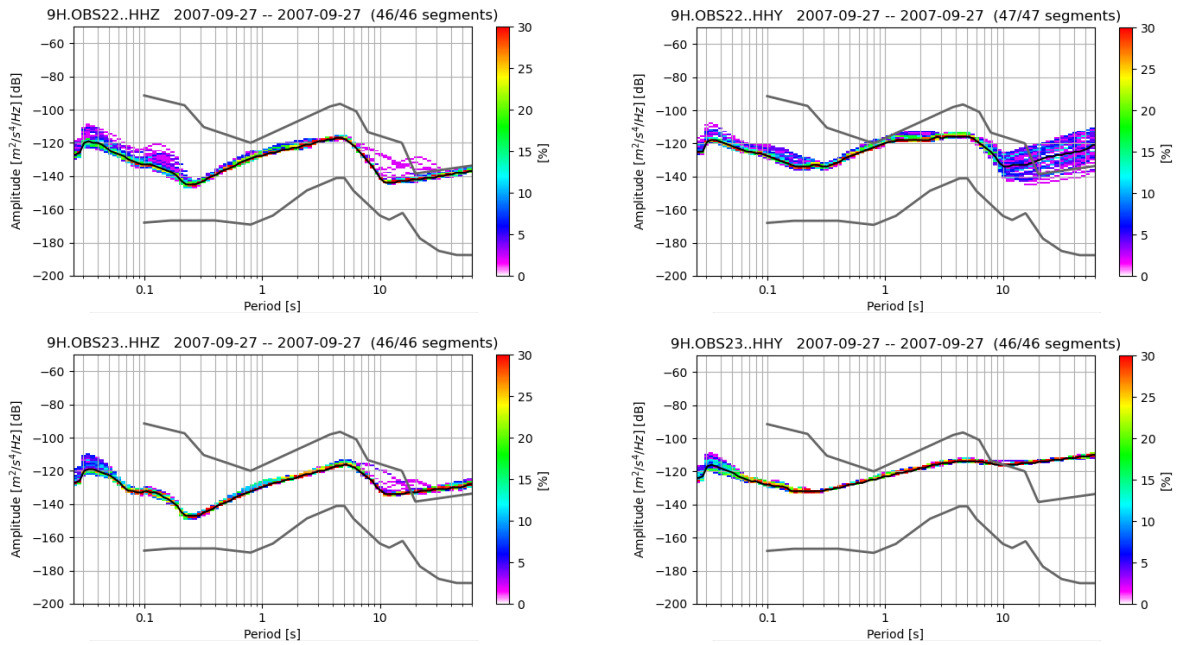

**Figure S20 | PPSD of the active network 9H for the day 27-09-2007 during the spring tide – PPSD of the entire network for 27-09-2007 to establish the OBS affected by the bottom current speed flow.**



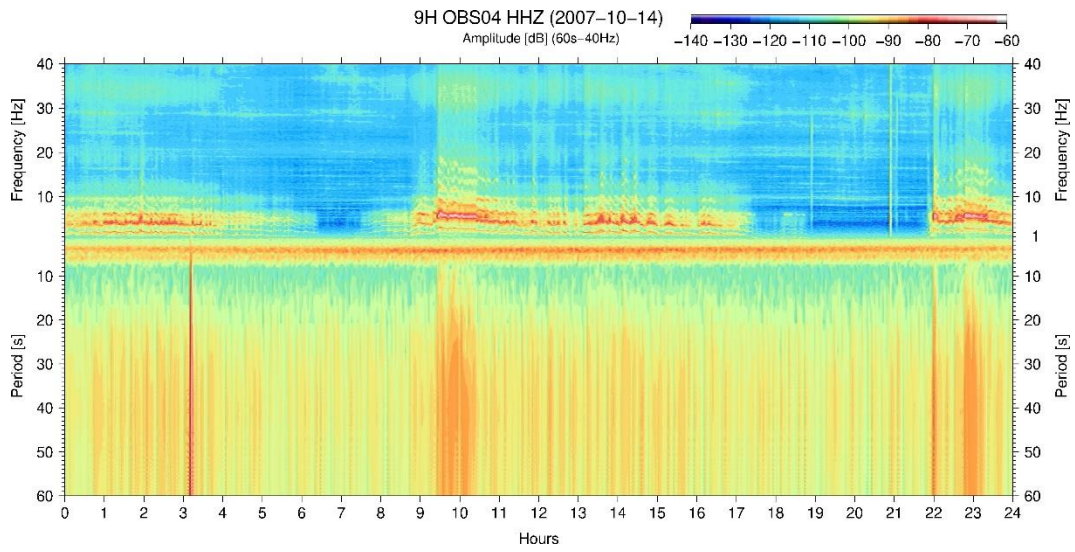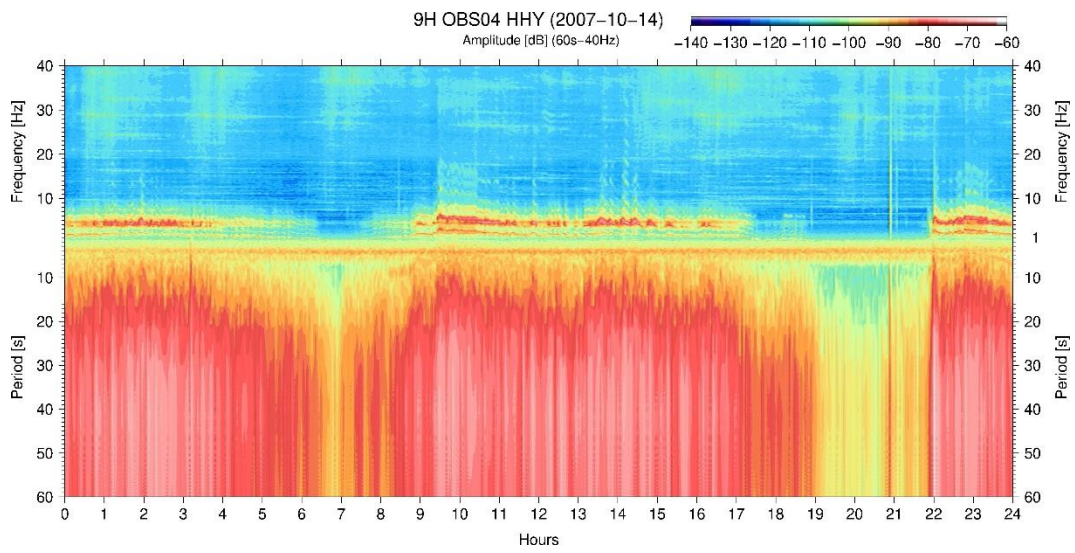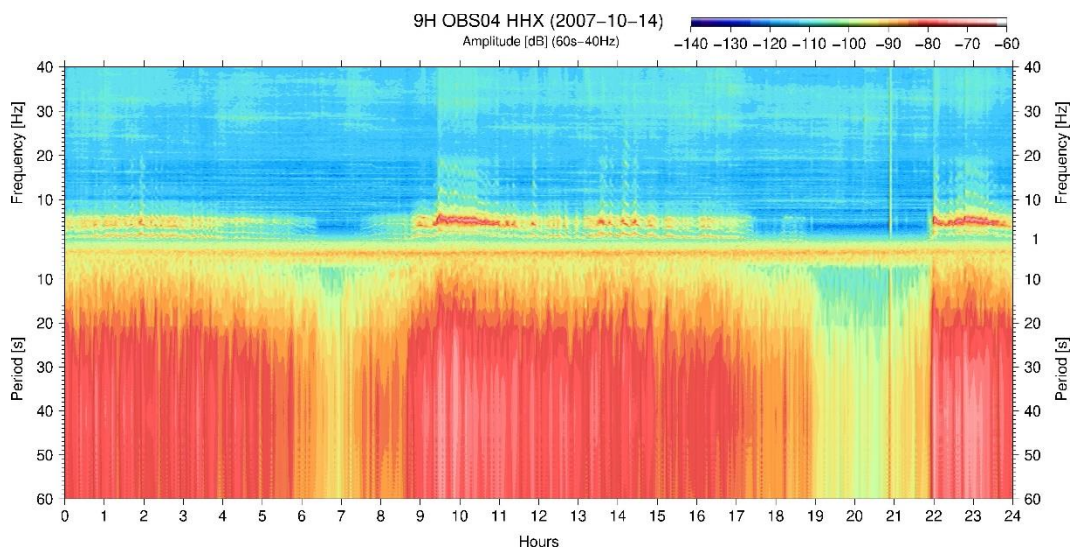

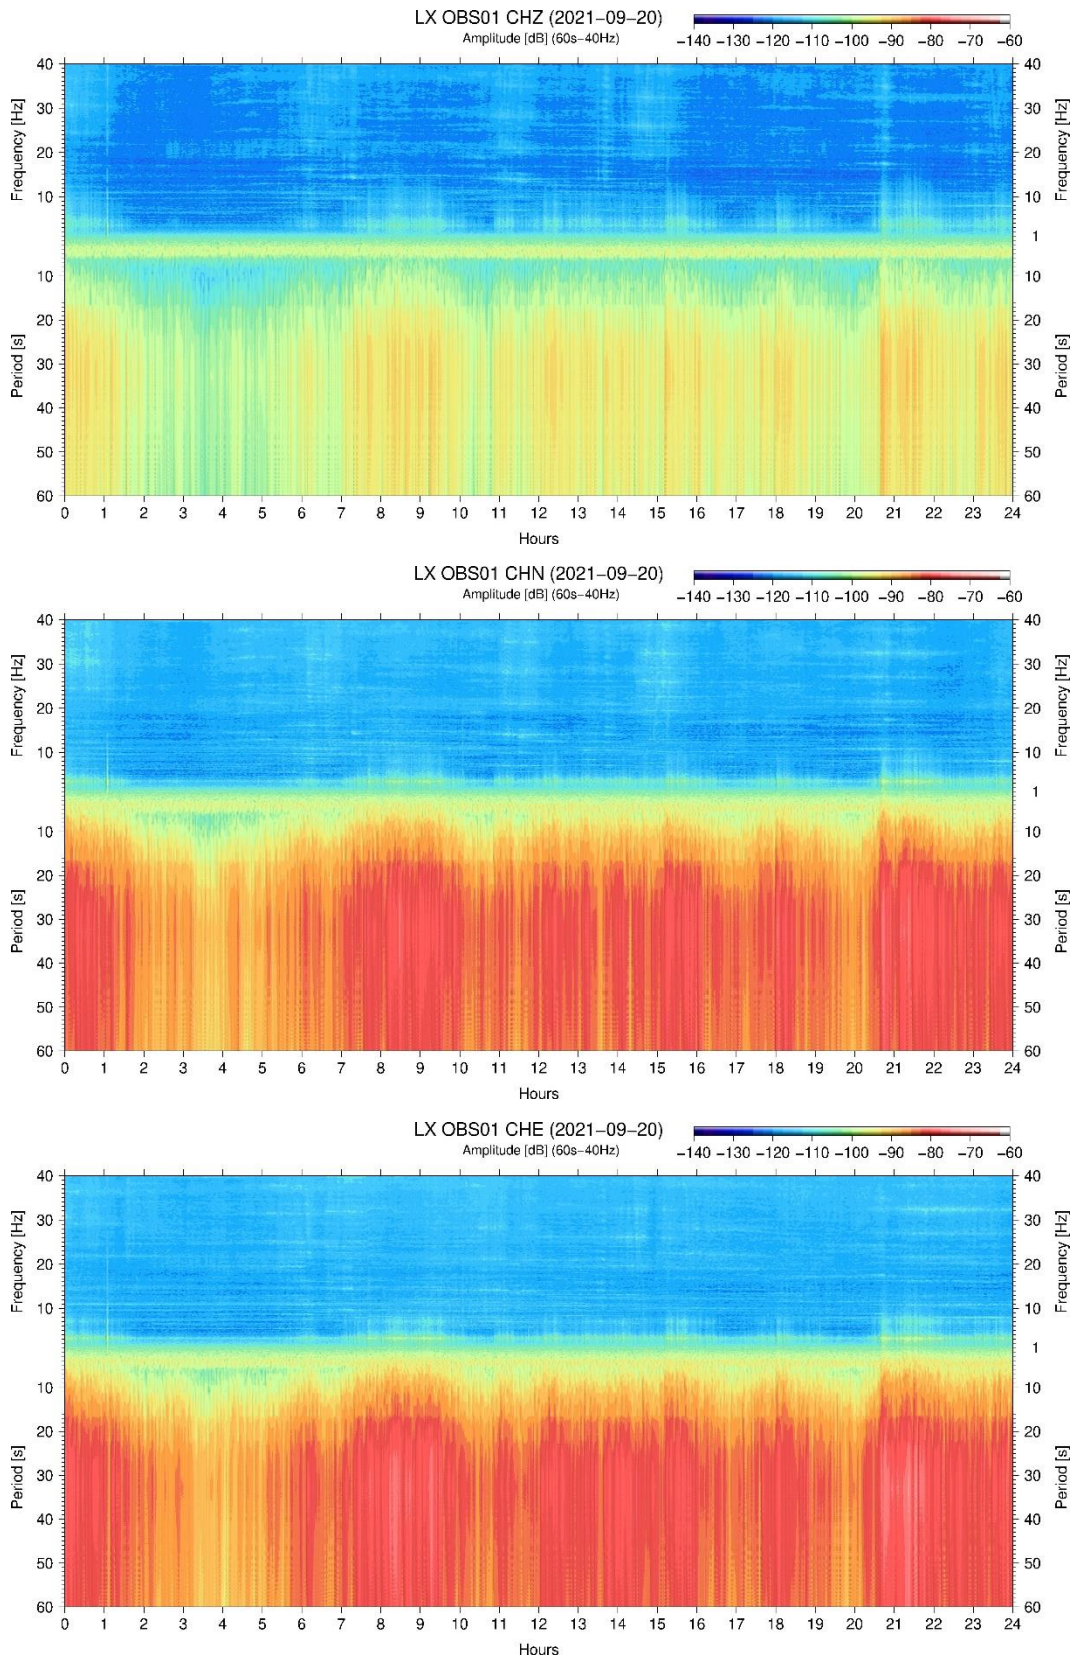

**Figure S21 | Spectrograms of 9H OBS04 and LX OBS01 for current direction – Three-component seismometer showing standard signals recorded with different spectral amplitudes.**
